# Supplementary material for: V-ATPase V0a1 promotes Weibel–Palade body biogenesis through the regulation of membrane fission
Source: eLife journal article supplement (doi:10.7554/elife.71526), 2021-12-14
Supplement: fig3-figsupp2-data1 [file Fig3-fig supp 2A.xlsx]

## Sheet: Sheet1
	Ratio	Ratio SD
7.5	1.12471	0.105184
7	0.925161	0.0563249
6.5	0.81194	0.0701306
6	0.596111	0.0326924
5.5	0.477428	0.0299858
	Ratio	Ratio SD		pH	pH SD
Control	0.560402	0.0247167		5.80229	0.0761218
BA	0.906931	0.0691624		6.86951	0.213004
CA	0.94682	0.0591563		6.99236	0.182188
shControl	0.576501	0.0245339		5.85187	0.0755588
shV0a2	0.667196	0.0274288		6.13118	0.0844742
shV0a1	0.619739	0.0695942		5.98503	0.214334
Double	0.717856	0.101593		6.28721	0.312883
