# Supplementary material for: V-ATPase V0a1 promotes Weibel–Palade body biogenesis through the regulation of membrane fission
Source: eLife journal article supplement (doi:10.7554/elife.71526), 2021-12-14
Supplement: fig3-figsupp3-data1 [file Fig3-figure supplement 3_Feret-shControl.xlsx]

## Sheet: shControl
	Area	Mean	Min	Max	X	Y	Feret	IntDen	%Area	RawIntDen	FeretX	FeretY	FeretAngle	MinFeret	Max/Min		Range
44	0.201	255	255	255	27.338	15.507	0.634	51.178	100	6630	308	175	146.31	0.439	1.44419		0
116	0.216	255	255	255	16.486	39.624	0.634	55.115	100	7140	186	448	123.69	0.439	1.44419		0.5
173	0.216	255	255	255	87.14	56.048	0.634	55.115	100	7140	989	640	33.69	0.527	1.20304		1
270	0.216	255	255	255	20.455	79.572	0.634	55.115	100	7140	230	903	123.69	0.527	1.20304		1.5
17	0.201	255	255	255	3.616	9.462	0.669	51.178	100	6630	40	104	113.199	0.439	1.52392		2
58	0.224	255	255	255	28.156	19.1	0.669	57.083	100	7395	319	221	66.801	0.527	1.26945		2.5
201	0.239	255	255	255	23.967	61.82	0.669	61.02	100	7905	271	707	66.801	0.527	1.26945		3
45	0.224	255	255	255	86.624	15.674	0.686	57.083	100	7395	984	175	129.806	0.527	1.30171		3.5
238	0.232	255	255	255	18.553	73.043	0.686	59.052	100	7650	209	828	129.806	0.5	1.372		4
249	0.201	255	255	255	89.758	75.518	0.686	51.178	100	6630	1019	857	129.806	0.527	1.30171		4.5
23	0.232	255	255	255	23.783	11.272	0.708	59.052	100	7650	269	125	119.745	0.571	1.23993		5
96	0.293	255	255	255	85.887	32.383	0.708	74.799	100	9690	976	365	119.745	0.615	1.15122		5.5
178	0.262	255	255	255	77.422	56.648	0.708	66.925	100	8670	879	648	60.255	0.527	1.34345
204	0.27	255	255	255	68.81	62.519	0.708	68.894	100	8925	781	715	60.255	0.527	1.34345
230	0.27	255	255	255	59.959	70.959	0.708	68.894	100	8925	680	811	60.255	0.615	1.15122
241	0.255	255	255	255	19.551	73.441	0.708	64.957	100	8415	220	833	119.745	0.589	1.20204
177	0.255	255	255	255	43.854	56.463	0.725	64.957	100	8415	498	639	104.036	0.527	1.37571
209	0.293	234.868	0	255	80.134	64.572	0.725	68.894	92.105	8925	912	731	104.036	0.615	1.17886
264	0.208	245.556	0	255	50.052	78.697	0.746	51.178	96.296	6630	567	892	135	0.527	1.41556
303	0.232	255	255	255	18.023	88.196	0.751	59.052	100	7650	204	1008	69.444	0.439	1.71071
191	0.293	255	255	255	27.326	59.862	0.756	74.799	100	9690	309	685	54.462	0.527	1.43454
274	0.301	255	255	255	7.492	81.106	0.756	76.767	100	9945	82	926	35.538	0.615	1.22927
300	0.293	255	255	255	87.685	86.455	0.756	74.799	100	9690	996	988	54.462	0.527	1.43454
302	0.347	255	255	255	76.938	87.657	0.756	88.577	100	11475	872	1000	35.538	0.683	1.10688
32	0.293	255	255	255	44.172	13.456	0.786	74.799	100	9690	501	149	116.565	0.611	1.28642
100	0.324	255	255	255	14.603	34.587	0.786	82.672	100	10710	162	392	153.435	0.621	1.2657
106	0.201	255	255	255	42.486	36.674	0.786	51.178	100	6630	480	420	26.565	0.497	1.58149
103	0.371	255	255	255	55.375	35.859	0.81	94.483	100	12240	627	405	130.601	0.703	1.1522
174	0.401	255	255	255	16.624	56.299	0.81	102.356	100	13260	186	644	40.601	0.703	1.1522
193	0.239	246.774	0	255	22.213	60.196	0.81	59.052	96.774	7650	252	690	77.471	0.661	1.22542
304	0.216	255	255	255	82.113	88.317	0.81	55.115	100	7140	930	1004	167.471	0.351	2.30769
187	0.247	255	255	255	7.85	59.203	0.829	62.988	100	8160	88	670	122.005	0.604	1.37252
145	0.239	255	255	255	1.084	46.79	0.834	61.02	100	7905	7	534	18.435	0.535	1.55888
237	0.247	255	255	255	87.444	72.319	0.834	62.988	100	8160	991	825	18.435	0.431	1.93503
147	0.286	255	255	255	4.795	46.889	0.865	72.83	100	9435	52	529	113.962	0.615	1.4065
272	0.355	255	255	255	76.332	80.687	0.865	90.546	100	11730	867	923	66.038	0.527	1.64137
26	0.255	255	255	255	46.444	12.294	0.879	64.957	100	8415	525	144	53.13	0.497	1.76861
38	0.232	255	255	255	86.064	14.33	0.879	59.052	100	7650	976	159	126.87	0.435	2.02069
61	0.34	255	255	255	39.103	20.427	0.879	86.609	100	11220	441	235	36.87	0.575	1.5287
259	0.286	255	255	255	81.463	77.896	0.879	72.83	100	9435	925	891	53.13	0.559	1.57245
133	0.247	255	255	255	54.835	42.537	0.896	62.988	100	8160	619	482	168.69	0.527	1.70019
129	0.208	255	255	255	2.917	42.151	0.905	53.146	100	6885	31	475	119.055	0.439	2.0615
301	0.355	255	255	255	82.11	86.829	0.905	90.546	100	11730	932	983	119.055	0.703	1.28734
13	0.278	255	255	255	0.19	6.284	0.917	70.862	100	9180	0	66	106.699	0.439	2.08884
67	0.232	255	255	255	38.213	22.12	0.917	59.052	100	7650	434	247	106.699	0.414	2.21498
80	0.247	255	255	255	56.274	25.883	0.917	62.988	100	8160	639	299	73.301	0.621	1.47665
127	0.448	255	255	255	42.415	41.485	0.917	114.167	100	14790	482	467	106.699	0.788	1.16371
62	0.502	255	255	255	33.149	20.68	0.934	127.945	100	16575	374	231	131.186	0.791	1.18078
71	0.309	255	255	255	55.536	24.19	0.946	78.736	100	10200	629	280	68.199	0.615	1.53821
153	0.316	255	255	255	6.383	48.936	0.946	80.704	100	10455	70	562	68.199	0.517	1.82979
107	0.309	255	255	255	84.525	37.241	0.95	78.736	100	10200	959	428	56.31	0.55	1.72727
28	0.255	255	255	255	0.781	12.648	0.982	64.957	100	8415	3	143	169.695	0.527	1.86338
49	0.239	255	255	255	1.838	17.015	0.982	61.02	100	7905	15	192	169.695	0.351	2.79772
157	0.247	247.031	0	255	1.279	49.637	0.982	61.02	96.875	7905	10	562	153.435	0.439	2.2369
299	0.27	255	255	255	58.119	86.141	0.982	68.894	100	8925	657	979	169.695	0.439	2.2369
225	0.27	255	255	255	62.692	69.392	1.002	68.894	100	8925	708	788	164.745	0.351	2.8547
294	0.286	255	255	255	69.471	84.075	1.002	72.83	100	9435	787	961	52.125	0.463	2.16415
298	0.301	255	255	255	79.935	85.681	1.002	76.767	100	9945	904	977	15.255	0.439	2.28246
250	0.27	255	255	255	48.12	75.746	1.025	68.894	100	8925	546	868	59.036	0.54	1.89815
258	0.301	255	255	255	19.914	77.56	1.062	76.767	100	9945	222	880	155.556	0.439	2.41913
47	0.247	255	255	255	82.25	16.699	1.069	62.988	100	8160	935	184	99.462	0.351	3.04558
170	0.301	248.462	0	255	21.225	55.74	1.069	74.799	97.436	9690	241	641	80.538	0.517	2.0677
212	0.378	255	255	255	86.081	65.192	1.069	96.451	100	12495	978	737	99.462	0.527	2.02846
75	0.448	255	255	255	88.433	25.385	1.072	114.167	100	14790	1003	294	55.008	0.667	1.6072
196	0.224	246.207	0	255	73.915	60.912	1.072	55.115	96.552	7140	836	697	34.992	0.404	2.65347
207	0.232	255	255	255	0.287	63.888	1.072	59.052	100	7650	0	722	124.992	0.378	2.83598
141	0.618	255	255	255	5.628	46.093	1.111	157.471	100	20400	58	523	161.565	0.832	1.33534
63	0.726	255	255	255	82.667	20.836	1.125	185.029	100	23970	936	233	128.66	0.966	1.1646
168	0.27	255	255	255	3.86	54.559	1.125	68.894	100	8925	40	618	141.34	0.567	1.98413
214	0.479	255	255	255	24.527	66.827	1.142	122.04	100	15810	277	755	112.62	0.671	1.70194
110	0.301	255	255	255	40.754	38.118	1.146	76.767	100	9945	461	439	57.529	0.457	2.50766
115	0.293	255	255	255	51.081	39.513	1.146	74.799	100	9690	576	450	175.601	0.527	2.17457
136	0.247	255	255	255	3.163	43.962	1.156	62.988	100	8160	29	500	171.254	0.351	3.29345
164	0.355	255	255	255	18.03	52.494	1.156	90.546	100	11730	205	604	81.254	0.527	2.19355
113	0.316	255	255	255	85.498	38.796	1.179	80.704	100	10455	969	448	63.435	0.522	2.25862
143	0.849	255	255	255	82.511	46.673	1.179	216.523	100	28050	933	534	26.565	1.028	1.14689
112	0.278	255	255	255	56.547	38.785	1.195	70.862	100	9180	642	448	72.897	0.361	3.31025
253	0.355	255	255	255	72.399	76.938	1.195	90.546	100	11730	821	882	53.973	0.527	2.26755
102	0.293	255	255	255	11.283	35.243	1.224	74.799	100	9690	126	394	111.038	0.424	2.88679
140	0.548	255	255	255	85.761	45.912	1.243	139.756	100	18105	974	516	98.13	0.703	1.76814
119	0.201	255	255	255	52.121	39.972	1.249	51.178	100	6630	587	459	39.289	0.315	3.96508
233	0.34	255	255	255	6.665	71.521	1.249	86.609	100	11220	71	809	140.711	0.47	2.65745
24	0.34	255	255	255	3.758	11.747	1.258	86.609	100	11220	39	128	114.775	0.485	2.59381
57	0.363	255	255	255	89.705	19.051	1.258	92.514	100	11985	1018	211	114.775	0.506	2.48617
82	0.316	255	255	255	54.474	26.629	1.258	80.704	100	10455	619	311	77.905	0.439	2.8656
139	0.34	255	255	255	49.335	45.505	1.258	86.609	100	11220	555	521	24.775	0.432	2.91204
243	0.44	255	255	255	10.878	74.012	1.258	112.198	100	14535	116	841	167.905	0.439	2.8656
3	0.316	255	255	255	85.357	0.479	1.267	80.704	100	10455	967	0	123.69	0.49	2.58571
15	0.355	255	255	255	4.863	6.994	1.267	90.546	100	11730	51	74	123.69	0.525	2.41333
72	0.34	255	255	255	38.338	24.531	1.267	86.609	100	11220	432	286	56.31	0.497	2.5493
121	0.255	255	255	255	49.937	40.536	1.267	64.957	100	8415	564	455	123.69	0.377	3.36074
142	0.494	255	255	255	89.185	46.138	1.267	125.977	100	16320	1010	520	146.31	0.595	2.12941
74	0.301	255	255	255	56.864	24.94	1.279	76.767	100	9945	645	277	105.945	0.38	3.36579
285	0.479	255	255	255	69.744	82.504	1.279	122.04	100	15810	790	946	74.055	0.65	1.96769
8	0.563	255	255	255	33.016	3.971	1.297	143.692	100	18615	375	38	118.301	1.083	1.1976
53	0.378	255	255	255	0.706	18.247	1.297	96.451	100	12495	1	205	151.699	0.445	2.91461
135	0.278	255	255	255	85.704	43.615	1.297	70.862	100	9180	972	490	118.301	0.354	3.66384
159	0.479	255	255	255	27.721	51.259	1.297	122.04	100	15810	312	577	118.301	0.576	2.25174
197	0.44	255	255	255	6.208	61.326	1.297	112.198	100	14535	63	701	28.301	0.615	2.10894
261	0.324	255	255	255	5.897	78.368	1.306	82.672	100	10710	63	896	42.274	0.497	2.62777
181	0.479	255	255	255	70.688	57.421	1.33	122.04	100	15810	804	646	97.595	0.439	3.02961
228	0.517	255	255	255	17.781	70.866	1.338	131.882	100	17085	201	799	113.199	0.854	1.56674
275	0.563	255	255	255	48.254	81.205	1.338	143.692	100	18615	542	927	23.199	0.583	2.29503
292	0.309	255	255	255	8.008	83.677	1.338	78.736	100	10200	84	949	156.801	0.362	3.69613
132	0.34	255	255	255	11.002	42.823	1.341	86.609	100	11220	122	493	58.392	0.55	2.43818
280	0.54	255	255	255	10.494	82.124	1.341	137.787	100	17850	117	927	121.608	0.802	1.67207
128	0.525	255	255	255	53.82	41.803	1.344	133.85	100	17340	612	484	78.69	0.578	2.32526
31	0.672	255	255	255	52.606	13.601	1.364	171.25	100	22185	590	157	14.931	1.114	1.22442
216	0.78	255	255	255	83.434	67.08	1.364	198.807	100	25755	949	755	104.931	0.923	1.47779
235	0.27	255	255	255	29.007	72.284	1.372	68.894	100	8925	325	816	129.806	0.368	3.72826
262	0.371	255	255	255	14.328	78.374	1.372	94.483	100	12240	155	887	140.194	0.621	2.20934
88	0.201	255	255	255	25.56	27.892	1.375	51.178	100	6630	284	314	153.435	0.31	4.43548
182	0.262	255	255	255	72	57.522	1.375	66.925	100	8670	817	661	63.435	0.4	3.4375
286	0.417	255	255	255	54.712	82.257	1.389	106.293	100	13770	615	934	161.565	0.44	3.15682
29	0.255	255	255	255	47.546	12.869	1.417	64.957	100	8415	533	141	150.255	0.414	3.42271
52	0.201	255	255	255	59.724	18.109	1.417	51.178	100	6630	676	199	119.745	0.275	5.15273
288	0.309	255	255	255	79.194	82.649	1.417	78.736	100	10200	894	936	150.255	0.392	3.6148
1	0.293	255	255	255	56.967	0.197	1.419	74.799	100	9690	639	0	158.199	0.442	3.21041
64	0.371	255	255	255	53.905	21.956	1.43	94.483	100	12240	613	242	100.62	0.472	3.02966
206	0.278	255	255	255	84.613	63.153	1.449	70.862	100	9180	955	716	165.964	0.371	3.90566
78	1.251	255	255	255	89.32	25.812	1.462	318.879	100	41310	1011	300	57.265	1.297	1.12722
101	0.27	255	255	255	84.002	35.054	1.473	68.894	100	8925	954	391	107.354	0.345	4.26957
18	0.432	255	255	255	87.929	9.743	1.496	110.23	100	14280	993	104	139.764	0.769	1.94538
69	0.355	255	255	255	28.76	23.128	1.504	90.546	100	11730	319	262	173.29	0.35	4.29714
200	0.386	255	255	255	62.292	61.663	1.504	98.419	100	12750	701	701	173.29	0.439	3.42597
150	0.371	255	255	255	24.65	47.894	1.512	94.483	100	12240	274	549	35.538	0.512	2.95312
296	0.625	255	255	255	60.601	84.968	1.512	159.439	100	20655	681	971	35.538	0.747	2.0241
5	0.463	255	255	255	81.182	1.855	1.517	118.103	100	15300	920	12	100.008	0.728	2.08379
79	0.417	255	255	255	26.696	25.959	1.517	106.293	100	13770	303	289	100.008	0.615	2.46667
66	0.517	255	255	255	84.843	22.403	1.557	131.882	100	17085	963	263	73.61	0.527	2.95446
221	0.448	255	255	255	63.866	67.268	1.557	114.167	100	14790	718	768	16.39	0.471	3.30573
11	0.672	255	255	255	30.523	5.578	1.564	171.25	100	22185	340	70	38.157	0.777	2.01287
124	0.602	255	255	255	10.312	41.075	1.564	153.534	100	19890	112	461	128.157	0.621	2.51852
220	0.44	255	255	255	70.519	67.187	1.584	112.198	100	14535	795	762	160.56	0.472	3.35593
305	0.826	255	255	255	83.09	89.323	1.584	210.618	100	27285	938	1023	33.69	0.953	1.66212
120	0.355	255	255	255	24.944	40.541	1.603	90.546	100	11730	282	470	80.538	0.323	4.96285
295	0.587	255	255	255	55.161	84.633	1.603	149.598	100	19380	618	963	170.538	0.527	3.04175
27	0.394	255	255	255	4.049	12.578	1.615	100.388	100	13005	38	146	22.38	0.469	3.4435
183	0.695	255	255	255	66.023	57.739	1.615	177.155	100	22950	748	649	112.38	0.618	2.61327
84	0.772	255	255	255	84.268	27.599	1.62	196.839	100	25500	957	304	102.529	0.778	2.08226
290	0.448	255	255	255	75.033	82.996	1.62	114.167	100	14790	847	947	12.529	0.786	2.06107
48	0.695	255	255	255	13.2	17.294	1.634	177.155	100	22950	146	205	53.746	0.658	2.48328
283	0.61	255	255	255	30.798	82.137	1.634	155.503	100	20145	346	940	36.254	0.869	1.88032
160	0.641	251.928	0	255	18.843	51.565	1.641	161.408	98.795	20910	210	578	105.524	0.654	2.50917
199	0.332	249.07	0	255	8.536	61.956	1.641	82.672	97.674	10710	95	698	105.524	0.562	2.91993
217	0.525	255	255	255	25.349	67.49	1.641	133.85	100	17340	285	759	105.524	0.603	2.72139
242	0.455	255	255	255	89.237	73.635	1.641	116.135	100	15045	1006	836	164.476	0.433	3.78984
21	0.502	255	255	255	4.849	10.887	1.651	127.945	100	16575	46	129	25.201	0.909	1.81628
10	0.803	255	255	255	29.977	4.728	1.658	204.712	100	26520	335	61	57.995	0.973	1.70401
104	0.34	255	255	255	60.954	36.072	1.658	86.609	100	11220	688	420	57.995	0.403	4.11414
25	0.247	255	255	255	27.884	12.292	1.688	62.988	100	8160	312	133	128.66	0.311	5.42765
167	0.672	255	255	255	6.315	54.606	1.69	171.25	100	22185	69	613	98.973	0.844	2.00237
179	0.787	252.5	0	255	19.195	57.33	1.69	198.807	99.02	25755	214	643	117.897	0.748	2.25936
86	0.409	255	255	255	57.703	28.165	1.697	104.325	100	13515	653	330	68.749	0.405	4.19012
192	0.494	255	255	255	28.172	60.47	1.697	125.977	100	16320	317	679	111.251	0.472	3.59534
56	0.594	255	255	255	80.216	19.132	1.706	151.566	100	19635	907	210	124.509	0.621	2.74718
60	0.563	255	255	255	86.27	20.845	1.706	143.692	100	18615	977	228	124.509	0.668	2.55389
85	0.517	251.194	0	255	59.031	27.663	1.731	129.914	98.507	16830	670	326	66.038	0.741	2.33603
188	0.579	255	255	255	23.56	59.824	1.733	147.629	100	19125	265	672	120.466	0.827	2.09553
108	0.448	255	255	255	46.32	37.638	1.744	114.167	100	14790	521	436	49.086	0.42	4.15238
184	0.648	255	255	255	72.815	57.848	1.744	165.345	100	21420	822	666	49.086	0.591	2.95093
166	0.471	255	255	255	9.148	53.968	1.751	120.072	100	15555	96	611	162.474	0.462	3.79004
19	0.679	255	255	255	44.585	10.808	1.768	173.218	100	22440	503	115	116.565	0.682	2.59238
297	0.371	255	255	255	74.761	85.305	1.768	94.483	100	12240	842	975	26.565	0.372	4.75269
232	0.563	255	255	255	57.57	71.899	1.779	143.692	100	18615	651	807	110.225	0.578	3.07785
105	0.44	255	255	255	46.53	36.197	1.803	112.198	100	14535	520	405	136.975	0.497	3.62777
244	0.648	255	255	255	50.063	74.804	1.803	165.345	100	21420	562	859	43.025	0.559	3.2254
54	0.911	255	255	255	87.918	19.033	1.809	232.27	100	30090	989	222	29.055	1.316	1.37462
266	0.363	255	255	255	58.332	79.45	1.809	92.514	100	11985	655	910	29.055	0.393	4.60305
30	0.455	255	255	255	55.127	13.701	1.811	116.135	100	15045	628	166	75.964	0.838	2.1611
125	0.648	255	255	255	16.795	41.483	1.811	165.345	100	21420	185	465	129.094	0.719	2.51878
185	0.448	255	255	255	3.732	59.158	1.811	114.167	100	14790	40	663	104.036	0.398	4.55025
287	0.525	255	255	255	71.275	82.691	1.811	133.85	100	17340	801	934	157.166	0.771	2.3489
156	0.533	255	255	255	45.848	50.011	1.847	135.819	100	17595	517	578	64.654	0.491	3.76171
269	0.702	255	255	255	12.168	79.643	1.862	179.123	100	23205	129	903	160.71	0.556	3.34892
271	0.563	255	255	255	2.8	80.644	1.862	143.692	100	18615	28	928	70.71	0.469	3.97015
20	0.509	255	255	255	81.568	10.788	1.864	129.914	100	16830	920	115	135	0.435	4.28506
51	0.533	255	255	255	37.817	17.376	1.864	135.819	100	17595	419	196	171.87	0.351	5.31054
281	0.54	255	255	255	7.669	82.365	1.88	137.787	100	17850	81	928	127.405	0.741	2.53711
276	1.328	255	255	255	50.545	81.38	1.893	338.563	100	43860	565	930	21.801	1.054	1.79602
223	0.687	255	255	255	84.149	69.064	1.919	175.187	100	22695	948	789	15.945	0.542	3.54059
68	0.656	255	255	255	30.492	23.582	1.927	167.313	100	21675	339	274	43.152	0.781	2.46735
81	0.733	255	255	255	83.837	25.949	1.927	186.997	100	24225	945	300	24.228	0.586	3.2884
161	0.726	255	255	255	3.116	51.826	1.927	185.029	100	23970	29	596	46.848	0.851	2.26439
210	0.548	255	255	255	24.545	65.188	1.927	139.756	100	18105	275	734	114.228	0.571	3.37478
7	0.625	255	255	255	89.156	2.966	1.935	159.439	100	20655	1006	42	39.472	0.683	2.83309
55	0.625	255	255	255	82.618	19.114	1.951	159.439	100	20655	934	209	125.838	0.51	3.82549
137	0.919	255	255	255	9.711	44.883	1.992	234.238	100	30345	103	501	138.576	0.845	2.3574
226	0.432	255	255	255	21.976	69.942	1.992	110.23	100	14280	243	789	131.424	0.531	3.75141
246	0.432	255	255	255	8.687	75.107	1.992	110.23	100	14280	90	862	41.424	0.373	5.34048
257	0.841	255	255	255	88.764	77.614	2.003	214.554	100	27795	1002	881	164.745	0.966	2.0735
163	0.641	255	255	255	0.43	52.344	2.005	163.376	100	21165	0	586	118.811	0.55	3.64545
22	0.479	255	255	255	7.868	11.704	2.028	122.04	100	15810	89	122	94.97	0.351	5.77778
76	0.409	255	255	255	33.611	26.123	2.028	104.325	100	13515	381	285	94.97	0.501	4.0479
289	1.073	255	255	255	59.81	83.179	2.049	273.606	100	35445	671	939	149.036	0.977	2.09724
245	1.058	255	255	255	86.141	75.059	2.051	269.669	100	34935	969	855	170.134	1.273	1.61115
236	0.355	255	255	255	2.109	72.392	2.068	90.546	100	11730	10	821	167.735	0.379	5.45646
50	0.988	255	255	255	54.241	17.924	2.074	251.954	100	32640	610	194	126.384	0.994	2.08652
267	0.919	255	255	255	50.075	79.922	2.074	234.238	100	30345	561	900	126.384	0.889	2.33296
94	0.795	255	255	255	29.941	29.238	2.096	202.744	100	26265	331	326	146.976	0.604	3.4702
227	0.718	255	255	255	55.821	70.346	2.096	183.06	100	23715	627	791	146.976	0.816	2.56863
229	0.625	251.852	0	255	12.844	71.424	2.112	157.471	98.765	20400	143	802	106.928	0.493	4.28398
97	0.888	255	255	255	85.168	33.455	2.116	226.365	100	29325	967	393	85.236	0.953	2.22036
234	0.471	255	255	255	4.398	72.401	2.116	120.072	100	15555	42	815	131.634	0.41	5.16098
37	1.482	253.672	0	255	48.378	14.963	2.125	375.962	99.479	48705	537	167	150.255	1.574	1.35006
162	0.702	249.396	0	255	5.135	52.539	2.125	175.187	97.802	22695	56	609	82.875	0.815	2.60736
158	0.71	255	255	255	0.917	51.243	2.145	181.092	100	23460	0	575	145.008	0.796	2.69472
171	0.834	255	255	255	74.141	56.62	2.154	212.586	100	27540	841	656	78.232	0.542	3.97417
33	0.633	255	255	255	50.642	13.747	2.17	161.408	100	20910	565	150	158.629	0.834	2.60192
138	0.509	255	255	255	88.19	45.837	2.202	129.914	100	16830	998	511	118.61	0.45	4.89333
146	0.479	255	255	255	3.436	46.924	2.203	122.04	100	15810	28	530	156.501	0.5	4.406
180	1.065	247.609	0	255	21.022	57.905	2.224	263.764	97.101	34170	237	671	80.91	0.879	2.53015
148	0.795	255	255	255	4.021	47.843	2.24	202.744	100	26265	33	538	154.44	0.761	2.9435
284	0.702	255	255	255	57.579	82.312	2.284	179.123	100	23205	642	931	157.38	0.556	4.10791
218	1.166	255	255	255	55.721	67.432	2.291	297.227	100	38505	621	767	175.601	1.028	2.2286
36	0.865	255	255	255	33.1	14.734	2.364	220.46	100	28560	367	158	138.013	0.621	3.80676
195	1.274	253.455	0	255	70.32	61.333	2.398	322.816	99.394	41820	785	702	28.443	1.066	2.24953
77	0.679	255	255	255	57.775	26.181	2.417	173.218	100	22440	653	311	70.907	0.445	5.43146
41	0.718	255	255	255	62.096	15.023	2.436	183.06	100	23715	692	178	25.641	0.712	3.42135
279	1.065	255	255	255	73.354	82.102	2.447	271.638	100	35190	830	922	111.038	1.027	2.38267
114	1.166	255	255	255	15.785	40.216	2.466	297.227	100	38505	177	472	85.914	1.172	2.1041
14	0.857	255	255	255	83.35	6.603	2.474	218.491	100	28305	933	77	6.116	0.776	3.18814
35	0.687	255	255	255	54.186	14.546	2.476	175.187	100	22695	611	153	117.474	0.454	5.45374
194	1.289	253.473	0	255	24.893	61.554	2.476	326.753	99.401	42330	277	688	117.474	0.892	2.77578
255	0.857	255	255	255	47.17	78.082	2.497	218.491	100	28305	528	899	50.711	0.54	4.62407
293	0.957	252.944	0	255	4.807	84.104	2.516	242.112	99.194	31365	42	952	155.225	0.738	3.40921
165	1.683	253.83	0	255	25.195	53.17	2.562	427.14	99.541	55335	288	621	84.094	1.828	1.40153
215	0.949	255	255	255	77.823	67.886	2.572	242.112	100	31365	886	784	82.147	0.791	3.25158
87	1.266	239.451	0	255	31.553	28.136	2.594	303.132	93.902	39270	347	315	151.699	1.072	2.41978
99	1.088	255	255	255	57.883	35.627	2.637	277.543	100	35955	659	388	91.909	1.142	2.30911
189	1.891	255	255	255	64.832	60.454	2.656	482.255	100	62475	723	693	34.216	1.592	1.66834
247	0.61	255	255	255	1.375	75.182	2.676	155.503	100	20145	0	849	156.801	0.521	5.13628
256	1.876	255	255	255	0.83	77.997	2.689	478.318	100	61965	0	881	141.633	1.86	1.4457
205	0.926	255	255	255	26.025	63.537	2.729	236.207	100	30600	286	738	56.821	0.852	3.20305
90	3.119	249.95	0	255	88.973	28.908	2.757	779.482	98.02	100980	997	332	30.651	2.052	1.34357
9	2.046	249.226	0	255	89.113	5.175	2.778	509.813	97.736	66045	1014	74	71.565	2.001	1.38831
154	0.988	255	255	255	21.747	50.184	2.778	251.954	100	32640	242	556	108.435	0.737	3.76934
260	0.772	255	255	255	52.948	79.113	2.791	196.839	100	25500	596	912	61.821	0.57	4.89649
122	2.177	255	255	255	85.661	41.666	2.792	555.086	100	71910	973	456	114.146	1.611	1.73309
152	1.297	250.446	0	255	10.398	48.659	2.792	324.784	98.214	42075	105	561	24.146	0.862	3.23898
190	0.78	255	255	255	80.652	59.759	2.807	198.807	100	25755	904	685	20.136	0.483	5.81159
73	0.926	252.875	0	255	81.108	25.608	2.824	234.238	99.167	30345	923	275	95.356	0.703	4.01707
186	0.818	255	255	255	4.871	60.211	2.878	208.649	100	27030	54	701	77.661	0.644	4.46894
282	1.351	255	255	255	4.27	82.556	2.878	344.468	100	44625	36	930	148.736	0.894	3.21924
219	0.926	255	255	255	86.687	67.107	2.898	236.207	100	30600	971	768	14.036	0.553	5.24051
39	0.664	255	255	255	40.778	14.607	2.921	169.281	100	21930	448	170	15.709	0.434	6.73041
40	1.258	255	255	255	59.493	15.035	2.921	320.847	100	41565	660	178	21.161	0.945	3.09101
130	0.679	255	255	255	43.077	43.273	2.947	173.218	100	22440	486	509	79.695	0.438	6.72831
248	1.768	255	255	255	79.034	75.842	2.947	450.761	100	58395	885	869	26.565	0.933	3.15863
4	1.636	255	255	255	87.492	0.644	3.03	417.298	100	54060	983	0	150.461	1.234	2.45543
111	1.204	255	255	255	84.493	39.622	3.05	307.069	100	39780	957	434	101.634	0.801	3.80774
123	2.586	248.91	0	255	12.91	41.261	3.05	643.663	97.612	83385	132	481	41.496	1.69	1.80473
65	1.606	255	255	255	56.718	22.676	3.065	409.425	100	53040	634	244	117.3	1.245	2.46185
268	1.305	250.473	0	255	0.672	80.941	3.069	326.753	98.225	42330	7	901	103.241	1.509	2.0338
46	1.119	255	255	255	57.19	17.648	3.09	285.416	100	36975	646	184	104.826	0.671	4.60507
134	0.895	255	255	255	47.967	44.282	3.09	228.333	100	29580	540	521	75.174	0.691	4.47178
83	2.563	253.464	0	255	87.654	27.582	3.095	649.568	99.398	84150	983	311	173.48	2.134	1.45033
144	0.926	255	255	255	44.759	47.832	3.14	236.207	100	30600	504	560	72.072	0.608	5.16447
211	1.374	253.567	0	255	10.384	66.39	3.168	348.405	99.438	45135	118	737	93.18	1.755	1.80513
277	1.343	255	255	255	55.988	81.855	3.169	342.5	100	44370	624	922	133.877	1.249	2.53723
265	1.227	255	255	255	85.264	79.483	3.194	312.974	100	40545	958	912	31.504	0.853	3.74443
222	1.729	255	255	255	13.272	69.183	3.251	440.919	100	57120	136	780	161.075	1.925	1.68883
273	1.266	255	255	255	74.768	81.336	3.307	322.816	100	41820	830	918	163.009	1.103	2.99819
109	1.752	255	255	255	53.999	38.923	3.321	446.824	100	57885	602	457	52.524	1.207	2.75145
42	1.853	242.25	0	255	54.402	16.398	3.417	448.793	95	58140	608	172	133.958	1.294	2.64065
118	1.443	253.636	0	255	48.609	40.901	3.437	366.12	99.465	47430	555	449	94.399	1.142	3.00963
149	1.652	255	255	255	22.787	48.866	3.481	421.235	100	54570	258	577	79.824	1.128	3.08599
93	1.258	255	255	255	34.11	28.937	3.501	320.847	100	41565	370	335	17.526	0.556	6.29676
89	1.999	251.062	0	255	86.363	29.573	3.56	501.939	98.456	65025	978	315	105.751	1.275	2.79216
252	1.196	255	255	255	86.05	76.543	3.56	305.1	100	39525	963	875	15.751	1.204	2.95681
239	1.359	255	255	255	54.549	73.929	3.632	346.436	100	44880	603	851	32.152	0.613	5.92496
92	1.783	252.792	0	255	84.056	29.862	3.641	450.761	99.134	58395	947	321	109.747	1.545	2.35663
291	1.613	253.78	0	255	53.36	84.097	3.645	409.425	99.522	53040	588	964	15.376	1.438	2.53477
202	2.902	251.609	0	255	8.636	63.71	3.666	730.272	98.67	94605	82	712	134.029	1.775	2.06535
224	1.142	255	255	255	87.569	69.426	3.708	291.322	100	37740	974	796	13.707	0.669	5.5426
175	1.281	255	255	255	79.134	57.669	3.753	326.753	100	42330	887	637	147.426	1.69	2.22071
231	1.552	255	255	255	51.221	71.295	3.803	395.646	100	51255	557	813	6.633	0.962	3.95322
176	2.833	252.221	0	255	23.249	57.786	3.815	714.525	98.91	92565	249	673	51.546	2.809	1.35813
254	1.907	255	255	255	56.644	77.726	3.934	486.192	100	62985	622	899	29.427	2.188	1.79799
6	1.907	249.838	0	255	86.508	3.434	4.062	476.35	97.976	61710	972	59	51.147	1.217	3.33772
151	2.354	253.328	0	255	2.65	48.944	4.167	596.422	99.344	77265	4	550	155.056	1.664	2.50421
208	1.86	255	255	255	57.928	65.244	4.362	474.382	100	61455	636	752	27.597	0.835	5.22395
12	5.89	249.987	0	255	86.448	7.185	4.394	1472.36	98.034	190740	982	106	78.465	3.826	1.14846
16	2.57	255	255	255	0.702	10.366	4.412	655.473	100	84915	6	92	102.653	1.62	2.72346
34	4.577	254.57	0	255	1.142	15.091	4.412	1165.29	99.831	150960	2	195	54.728	2.899	1.5219
2	4.994	254.606	0	255	83.572	1.211	4.475	1271.58	99.845	164730	927	0	136.591	2.594	1.72513
213	3.821	252.424	0	255	13.621	67.181	4.557	964.511	98.99	124950	131	753	146.004	2.268	2.00926
98	4.616	252.015	0	255	51.747	36.058	4.755	1163.32	98.829	150705	579	430	62.488	2.436	1.95197
203	3.165	255	255	255	64.144	63.573	4.78	807.039	100	104550	707	717	162.897	2.633	1.81542
240	4.276	255	255	255	84.06	74.188	4.861	1090.49	100	141270	932	837	173.774	3.081	1.57773
251	2.933	253.658	0	255	51.849	77.85	5.118	744.051	99.474	96390	576	909	50.572	1.843	2.77699
169	3.775	249.264	0	255	26.056	57.882	5.144	940.89	97.751	121890	292	627	97.853	2.389	2.1532
155	5.319	247.598	0	255	6.809	51.241	5.244	1316.85	97.097	170595	54	561	121.293	2.889	1.81516
59	4.114	254.043	0	255	88.781	21.784	5.312	1045.21	99.625	135405	985	233	124.216	2.848	1.86517
70	4.423	202.042	0	255	29.958	25.756	5.319	893.649	79.232	115770	317	269	149.199	2.411	2.20614
95	4.724	252.917	0	255	53.844	32.76	5.468	1194.81	99.183	154785	586	393	46.302	2.449	2.23275
278	5.156	255	255	255	65.445	82.863	5.515	1314.88	100	170340	716	962	30.651	3.71	1.48652
15	0.208	255	255	255	11.023	7.317	0.634	53.146	100	6885	124	80	123.69	0.439	1.44419
94	0.201	255	255	255	39.83	27.513	0.634	51.178	100	6630	451	316	56.31	0.439	1.44419
111	0.232	255	255	255	11.433	30.124	0.634	59.052	100	7650	128	340	123.69	0.527	1.20304
179	0.224	255	255	255	16.322	41.813	0.634	57.083	100	7395	184	479	56.31	0.527	1.20304
26	0.239	255	255	255	7.787	10.068	0.669	61.02	100	7905	87	118	66.801	0.527	1.26945
76	0.316	255	255	255	60.93	24.359	0.708	80.704	100	10455	691	274	119.745	0.615	1.15122
125	0.293	255	255	255	38.905	31.074	0.708	74.799	100	9690	439	355	29.745	0.615	1.15122
214	0.278	255	255	255	34.416	53.894	0.708	70.862	100	9180	390	617	60.255	0.615	1.15122
268	0.232	255	255	255	50.2	74.791	0.708	59.052	100	7650	568	849	150.255	0.511	1.38552
304	0.224	255	255	255	45.661	82.768	0.708	57.083	100	7395	516	944	29.745	0.527	1.34345
112	0.216	255	255	255	55.568	30.208	0.725	55.115	100	7140	632	340	104.036	0.49	1.47959
27	0.247	255	255	255	8.654	10.708	0.751	62.988	100	8160	97	118	110.556	0.439	1.71071
123	0.232	255	255	255	48.091	30.994	0.751	59.052	100	7650	546	349	110.556	0.439	1.71071
338	0.293	255	255	255	87.519	89.114	0.751	74.799	100	9690	995	1010	110.556	0.527	1.42505
36	0.309	255	255	255	32.031	14.279	0.756	78.736	100	10200	361	165	35.538	0.615	1.22927
47	0.255	255	255	255	37.916	16.367	0.756	64.957	100	8415	429	183	125.538	0.55	1.37455
120	0.232	255	255	255	54.733	30.721	0.756	59.052	100	7650	620	346	144.462	0.589	1.28353
137	0.208	255	255	255	56.534	33.001	0.756	53.146	100	6885	641	378	35.538	0.615	1.22927
243	0.309	255	255	255	67.131	64.484	0.756	78.736	100	10200	761	731	125.538	0.615	1.22927
247	0.224	255	255	255	88.406	66.238	0.756	57.083	100	7395	1004	758	54.462	0.439	1.7221
149	0.208	255	255	255	40.326	34.895	0.786	53.146	100	6885	458	393	116.565	0.432	1.81944
228	0.347	255	255	255	69.325	59.425	0.786	88.577	100	11475	785	678	26.565	0.615	1.27805
256	0.201	255	255	255	72.652	67.972	0.786	51.178	100	6630	823	771	153.435	0.405	1.94074
262	0.216	255	255	255	77.325	71.994	0.786	55.115	100	7140	878	815	116.565	0.439	1.79043
90	0.347	255	255	255	49.069	26.825	0.81	88.577	100	11475	557	301	102.529	0.615	1.31707
249	0.216	255	255	255	73.466	66.431	0.81	55.115	100	7140	836	761	77.471	0.615	1.31707
297	0.34	255	255	255	42.602	81.823	0.829	86.609	100	11220	481	934	32.005	0.615	1.34797
300	0.293	255	255	255	71.443	82.136	0.829	74.799	100	9690	811	939	57.995	0.693	1.19625
301	0.232	255	255	255	48.062	82.289	0.829	59.052	100	7650	545	941	57.995	0.471	1.76008
46	0.239	255	255	255	34.657	16.491	0.834	61.02	100	7905	393	192	71.565	0.419	1.99045
121	0.239	255	255	255	57.498	30.899	0.834	61.02	100	7905	653	347	108.435	0.439	1.89977
38	0.34	255	255	255	11.116	14.982	0.865	86.609	100	11220	124	175	66.038	0.615	1.4065
333	0.255	255	255	255	28.872	88.401	0.879	64.957	100	8415	326	1010	53.13	0.527	1.66793
124	0.216	255	255	255	26.216	31.152	0.896	55.115	100	7140	298	360	78.69	0.398	2.25126
32	0.27	255	255	255	8.832	12.728	0.905	68.894	100	8925	97	149	60.945	0.506	1.78854
205	0.208	255	255	255	52.2	50.8	0.905	53.146	100	6885	591	574	119.055	0.463	1.95464
259	0.247	255	255	255	57.671	69.222	0.905	62.988	100	8160	652	790	29.055	0.497	1.82093
330	0.425	255	255	255	85.013	87.777	0.905	108.261	100	14025	965	995	119.055	0.615	1.47154
68	0.371	255	255	255	29.431	22.349	0.917	94.483	100	12240	334	250	106.699	0.615	1.49106
142	0.255	255	255	255	13.593	33.507	0.917	64.957	100	8415	153	376	106.699	0.351	2.61254
252	0.201	255	255	255	75.775	67.905	0.917	51.178	100	6630	861	767	106.699	0.432	2.12269
274	0.208	255	255	255	88.498	75.648	0.917	53.146	100	6885	1005	866	73.301	0.389	2.35733
253	0.224	255	255	255	52.983	67.856	0.934	57.083	100	7395	599	776	48.814	0.425	2.19765
59	0.347	255	255	255	39.375	18.715	0.946	88.577	100	11475	443	211	158.199	0.527	1.79507
81	0.301	255	255	255	31.434	25.455	0.946	76.767	100	9945	356	295	68.199	0.439	2.1549
146	0.247	255	255	255	53.078	34.199	0.946	62.988	100	8160	599	391	21.801	0.351	2.69516
198	0.316	255	255	255	32.83	49.003	0.946	80.704	100	10455	369	560	21.801	0.49	1.93061
279	0.286	255	255	255	72.518	78.153	0.95	72.83	100	9435	822	894	56.31	0.471	2.01699
177	0.247	255	255	255	66.537	41.379	0.982	62.988	100	8160	756	476	63.435	0.636	1.54403
296	0.201	255	255	255	8.837	81.962	0.982	51.178	100	6630	98	938	63.435	0.354	2.77401
340	0.278	255	255	255	7.287	89.506	0.982	70.862	100	9180	80	1014	116.565	0.432	2.27315
342	0.224	255	255	255	10.584	89.727	0.982	57.083	100	7395	116	1019	153.435	0.405	2.42469
44	0.301	255	255	255	5.915	15.91	0.994	76.767	100	9945	63	177	135	0.527	1.88615
60	0.208	255	255	255	21.836	19.656	1.002	53.146	100	6885	248	230	74.745	0.611	1.63993
148	0.247	255	255	255	80.792	34.778	1.002	62.988	100	8160	915	392	142.125	0.373	2.68633
159	0.278	255	255	255	36.908	35.815	1.002	70.862	100	9180	415	406	164.745	0.439	2.28246
264	0.232	255	255	255	55.486	73.532	1.002	59.052	100	7650	628	832	105.255	0.618	1.62136
278	0.262	255	255	255	15.657	77.964	1.002	66.925	100	8670	173	886	164.745	0.442	2.26697
329	0.224	255	255	255	24.457	87.833	1.002	57.083	100	7395	277	994	105.255	0.359	2.79109
118	0.309	255	255	255	58.551	30.742	1.025	78.736	100	10200	664	344	120.964	0.6	1.70833
167	0.363	255	255	255	35.33	37.722	1.025	92.514	100	11985	397	427	149.036	0.554	1.85018
284	0.201	255	255	255	53.313	80.337	1.025	51.178	100	6630	604	919	59.036	0.359	2.85515
324	0.355	255	255	255	38.515	86.707	1.025	90.546	100	11730	434	991	30.964	0.551	1.86025
194	0.648	255	255	255	6.419	48.19	1.028	165.345	100	21420	71	543	109.983	0.879	1.16951
242	0.201	255	255	255	65.485	64.225	1.028	51.178	100	6630	740	733	19.983	0.327	3.14373
96	0.286	255	255	255	43.971	27.985	1.058	72.83	100	9435	495	314	131.634	0.559	1.89267
332	0.224	255	255	255	4.273	88.436	1.058	57.083	100	7395	44	1011	48.366	0.37	2.85946
31	0.409	255	255	255	7.492	12.309	1.062	104.325	100	13515	83	134	114.444	0.578	1.83737
51	0.363	255	255	255	39.027	17.444	1.062	92.514	100	11985	442	204	65.556	0.49	2.16735
74	0.255	255	255	255	33.939	23.071	1.062	64.957	100	8415	381	265	24.444	0.422	2.51659
238	0.301	255	255	255	70.173	63.586	1.062	76.767	100	9945	797	718	114.444	0.874	1.2151
255	0.262	255	255	255	54.418	68.119	1.069	66.925	100	8670	619	781	80.538	0.481	2.22245
161	0.301	255	255	255	31.633	36.025	1.072	76.767	100	9945	357	416	55.008	0.559	1.91771
341	0.401	255	255	255	83.3	89.574	1.072	102.356	100	13260	946	1014	124.992	0.695	1.54245
5	0.301	255	255	255	67.479	1.731	1.087	76.767	100	9945	766	14	104.036	0.351	3.09687
56	0.672	255	255	255	2.423	18.267	1.087	171.25	100	22185	26	214	75.964	0.914	1.18928
271	0.216	255	255	255	55.103	75.414	1.087	55.115	100	7140	626	852	104.036	0.351	3.09687
8	0.401	255	255	255	17.827	2.729	1.101	102.356	100	13260	201	37	61.39	0.567	1.9418
54	0.239	255	255	255	9.873	17.981	1.101	61.02	100	7905	110	200	118.61	0.432	2.54861
64	0.509	255	255	255	30.398	21.456	1.101	129.914	100	16830	343	250	61.39	0.703	1.56615
114	0.255	255	255	255	52.852	30.414	1.101	64.957	100	8415	598	352	61.39	0.414	2.65942
316	0.332	255	255	255	8.75	85.026	1.101	84.641	100	10965	95	971	28.61	0.479	2.29854
45	0.208	255	255	255	36.99	16.067	1.118	53.146	100	6885	417	187	45	0.371	3.01348
201	0.216	255	255	255	50.713	50.032	1.118	55.115	100	7140	573	574	45	0.384	2.91146
314	0.293	255	255	255	8.152	84.055	1.118	74.799	100	9690	89	961	45	0.497	2.2495
246	0.425	255	255	255	75.425	65.759	1.125	108.261	100	14025	853	743	128.66	0.738	1.52439
139	0.27	255	255	255	48.06	33.129	1.142	68.894	100	8925	541	375	157.38	0.452	2.52655
215	0.201	255	255	255	22.292	54.006	1.142	51.178	100	6630	248	617	22.62	0.31	3.68387
293	0.255	255	255	255	8.422	81.228	1.142	64.957	100	8415	93	931	67.38	0.379	3.01319
42	0.278	255	255	255	35.986	15.79	1.146	70.862	100	9180	406	185	57.529	0.39	2.93846
197	0.27	255	255	255	34.299	48.801	1.156	68.894	100	8925	383	555	171.254	0.5	2.312
79	0.371	255	255	255	34.679	25.538	1.172	94.483	100	12240	393	297	77.005	0.439	2.6697
307	0.216	255	255	255	19.931	83.14	1.179	55.115	100	7140	224	940	116.565	0.333	3.54054
17	0.262	255	255	255	23.761	7.734	1.182	66.925	100	8670	266	83	131.987	0.311	3.80064
52	0.27	255	255	255	8.689	17.676	1.195	68.894	100	8925	92	205	36.027	0.703	1.69986
168	0.316	255	255	255	10.426	38.085	1.195	80.704	100	10455	115	439	53.973	0.435	2.74713
173	0.293	255	255	255	25.278	38.269	1.195	74.799	100	9690	284	441	53.973	0.414	2.88647
239	0.216	255	255	255	24.867	63.817	1.195	55.115	100	7140	280	732	72.897	0.378	3.16138
305	0.27	255	255	255	52.122	82.729	1.195	68.894	100	8925	587	939	162.897	0.345	3.46377
320	0.255	255	255	255	8.028	86.209	1.195	64.957	100	8415	89	987	72.897	0.424	2.8184
154	0.286	255	255	255	38.832	35.411	1.221	72.83	100	9435	438	410	59.744	0.559	2.18426
280	0.471	255	255	255	56.272	79.752	1.221	120.072	100	15555	639	915	59.744	0.747	1.63454
4	0.401	255	255	255	33.881	1.036	1.224	102.356	100	13260	380	8	158.962	0.528	2.31818
7	0.455	255	255	255	34.112	2.187	1.224	116.135	100	15045	386	18	111.038	0.528	2.31818
66	0.27	255	255	255	4.116	22.187	1.224	68.894	100	8925	44	246	111.038	0.361	3.39058
273	0.394	255	255	255	87.586	75.504	1.224	100.388	100	13005	994	866	68.962	0.758	1.61478
322	0.34	255	255	255	7.356	86.527	1.224	86.609	100	11220	82	991	68.962	0.447	2.73826
88	0.286	255	255	255	58.51	26.895	1.233	72.83	100	9435	666	299	94.086	0.435	2.83448
106	0.401	255	255	255	83.545	29.228	1.249	102.356	100	13260	945	328	140.711	0.558	2.23835
260	0.401	255	255	255	49.902	69.973	1.249	102.356	100	13260	565	801	50.711	0.786	1.58906
299	0.286	255	255	255	61.063	82.268	1.249	72.83	100	9435	690	933	140.711	0.786	1.58906
10	0.432	255	255	255	7.248	4.23	1.258	110.23	100	14280	81	41	102.095	0.439	2.8656
9	0.386	255	255	255	68.284	3.175	1.267	98.419	100	12750	771	33	146.31	0.714	1.77451
109	0.216	255	255	255	14.632	30.167	1.279	55.115	100	7140	165	350	74.055	0.341	3.75073
135	0.517	255	255	255	20.884	33.273	1.279	131.882	100	17085	236	386	74.055	0.527	2.42694
244	0.347	255	255	255	69.324	64.364	1.279	88.577	100	11475	782	730	164.055	0.436	2.93349
213	0.316	255	255	255	31.444	52.448	1.306	80.704	100	10455	353	602	42.274	0.435	3.0023
126	0.811	255	255	255	56.25	31.428	1.318	206.681	100	26775	634	354	143.13	0.966	1.36439
312	0.347	255	255	255	63.56	83.596	1.318	88.577	100	11475	717	947	143.13	0.472	2.79237
117	0.34	255	255	255	44.027	30.675	1.33	86.609	100	11220	501	343	97.595	0.615	2.1626
165	0.316	255	255	255	32.603	37.298	1.33	80.704	100	10455	369	417	97.595	0.439	3.02961
182	0.293	255	255	255	24.256	43.236	1.338	74.799	100	9690	273	486	113.199	0.4	3.345
287	0.332	255	255	255	78.353	80.913	1.338	84.641	100	10965	889	927	66.801	0.445	3.00674
204	0.455	255	255	255	36.94	50.129	1.344	116.135	100	15045	413	569	168.69	0.439	3.0615
170	0.224	255	255	255	64.084	38.05	1.372	57.083	100	7395	724	438	39.806	0.324	4.23457
219	0.216	255	255	255	17.835	56.575	1.372	55.115	100	7140	197	639	140.194	0.331	4.14502
335	0.656	255	255	255	9.061	89.36	1.372	167.313	100	21675	99	1009	129.806	0.957	1.43365
6	0.394	255	255	255	66.965	2.042	1.375	100.388	100	13005	759	17	116.565	0.511	2.6908
48	0.401	255	255	255	35.816	16.891	1.375	102.356	100	13260	404	199	63.435	0.471	2.91932
191	0.509	255	255	255	38.806	47.05	1.375	129.914	100	16830	435	531	153.435	0.629	2.18601
266	0.332	255	255	255	88.528	74.591	1.375	84.641	100	10965	1004	857	63.435	0.432	3.18287
1	0.679	255	255	255	19.306	0.308	1.389	173.218	100	22440	212	0	161.565	0.791	1.75601
65	0.44	255	255	255	11.814	21.529	1.389	112.198	100	14535	127	244	161.565	0.629	2.20827
110	0.332	255	255	255	64.904	30.006	1.389	84.641	100	10965	731	344	18.435	0.39	3.56154
222	0.71	238.37	0	255	18.231	58.55	1.389	169.281	93.478	21930	200	663	145.305	0.742	1.87197
270	0.378	255	255	255	53.45	75.343	1.389	96.451	100	12495	602	861	34.695	0.619	2.24394
104	0.332	255	255	255	44.552	29.411	1.408	84.641	100	10965	507	326	93.576	0.351	4.0114
11	0.363	255	255	255	29.067	4.42	1.417	92.514	100	11985	327	43	119.745	0.432	3.28009
236	0.286	255	255	255	73.969	62.666	1.417	72.83	100	9435	834	712	172.875	0.351	4.03704
237	0.332	255	255	255	70.96	63.362	1.417	84.641	100	10965	806	728	82.875	0.439	3.22779
163	0.34	255	255	255	89.265	36.146	1.43	86.609	100	11220	1008	410	169.38	0.264	5.41667
225	0.286	255	255	255	64.022	58.802	1.43	72.83	100	9435	721	671	10.62	0.264	5.41667
251	0.355	255	255	255	86.503	67.355	1.43	90.546	100	11730	979	773	42.51	0.479	2.98539
289	0.216	255	255	255	3.775	81.084	1.43	55.115	100	7140	42	915	100.62	0.291	4.91409
147	0.71	255	255	255	55.728	35.053	1.441	181.092	100	23460	627	395	142.431	0.877	1.6431
195	0.772	255	255	255	28.584	48.404	1.441	196.839	100	25500	318	555	37.569	0.826	1.74455
321	0.463	255	255	255	10.77	86.411	1.449	118.103	100	15300	119	992	75.964	0.601	2.41098
327	0.78	255	255	255	27.285	87.68	1.449	198.807	100	25755	307	991	104.036	0.791	1.83186
91	0.455	255	255	255	55.574	27.087	1.454	116.135	100	15045	630	316	64.983	0.623	2.33387
143	0.502	255	255	255	57.464	33.607	1.454	127.945	100	16575	646	386	25.017	0.65	2.23692
208	0.594	255	255	255	29.948	51.477	1.454	151.566	100	19635	334	589	25.017	0.664	2.18976
224	0.278	255	255	255	16.564	59.144	1.462	70.862	100	9180	184	666	122.735	0.369	3.96206
29	0.293	255	255	255	35.92	11.831	1.473	74.799	100	9690	407	127	107.354	0.341	4.31965
175	0.417	255	255	255	23.655	40.537	1.473	106.293	100	13770	261	464	17.354	0.445	3.31011
183	0.517	255	255	255	79.572	45.665	1.473	131.882	100	17085	897	522	17.354	0.534	2.75843
325	0.309	255	255	255	16.902	87.347	1.473	78.736	100	10200	190	1002	72.646	0.381	3.86614
133	0.27	255	255	255	36.543	32.569	1.494	68.894	100	8925	412	378	61.928	0.275	5.43273
190	0.347	255	255	255	51.219	46.847	1.494	88.577	100	11475	575	536	28.072	0.589	2.5365
192	0.363	255	255	255	3.138	47.783	1.494	92.514	100	11985	32	551	61.928	0.392	3.81122
241	0.556	255	255	255	61.117	64.292	1.494	141.724	100	18360	688	736	28.072	0.565	2.64425
140	0.278	255	255	255	63.912	33.191	1.496	70.862	100	9180	722	385	40.236	0.597	2.50586
100	0.363	255	255	255	45.02	28.557	1.504	92.514	100	11985	511	318	96.71	0.703	2.1394
127	0.239	255	255	255	41.151	31.886	1.504	61.02	100	7905	467	370	83.29	0.264	5.69697
311	0.448	255	255	255	47.218	83.517	1.504	114.167	100	14790	529	951	173.29	0.581	2.58864
40	0.78	255	255	255	1.076	15.913	1.512	198.807	100	25755	4	185	35.538	1.145	1.32052
151	0.355	255	255	255	35.356	35.285	1.512	90.546	100	11730	398	409	54.462	0.39	3.87692
188	0.386	255	255	255	57.096	46.567	1.512	98.419	100	12750	646	537	54.462	0.472	3.20339
24	0.371	255	255	255	9.19	9.503	1.517	94.483	100	12240	103	117	79.992	0.385	3.94026
71	0.448	255	255	255	33.123	23.389	1.537	114.167	100	14790	372	258	120.964	0.535	2.8729
181	0.394	255	255	255	60.877	42.948	1.537	100.388	100	13005	688	496	59.036	0.393	3.91094
294	0.61	255	255	255	45.84	81.854	1.554	155.503	100	20145	516	939	47.291	0.663	2.34389
130	0.579	255	255	255	49.276	31.816	1.564	147.629	100	19125	552	358	141.843	0.717	2.18131
172	0.563	255	255	255	16.3	38.526	1.572	143.692	100	18615	181	446	63.435	0.553	2.84268
89	0.548	255	255	255	34.32	26.728	1.584	139.756	100	18105	382	307	19.44	0.528	3
18	0.316	255	255	255	18.719	8.676	1.603	80.704	100	10455	212	107	80.538	0.351	4.56695
306	0.741	255	255	255	1.901	83.386	1.613	188.965	100	24480	18	940	119.358	0.943	1.7105
103	0.502	255	255	255	17.552	29.363	1.615	127.945	100	16575	196	342	67.62	0.538	3.00186
164	0.494	255	255	255	88.908	36.86	1.615	125.977	100	16320	1004	416	157.62	0.527	3.06452
199	0.54	255	255	255	46.815	49.254	1.615	137.787	100	17850	525	564	22.38	0.535	3.01869
250	0.27	255	255	255	52.159	67.268	1.615	68.894	100	8925	587	772	45	0.311	5.19293
144	0.517	255	255	255	28.561	34.272	1.62	131.882	100	17085	319	383	130.601	0.497	3.25956
337	0.502	255	255	255	5.295	89.284	1.62	127.945	100	16575	53	1010	130.601	0.61	2.65574
55	0.509	255	255	255	40.556	18.37	1.634	129.914	100	16830	456	201	126.254	0.504	3.24206
196	0.44	255	255	255	31.581	49.075	1.634	112.198	100	14535	351	565	36.254	0.534	3.05993
240	0.818	255	255	255	72.509	64.17	1.658	208.649	100	27030	821	739	57.995	1.054	1.57306
285	0.347	255	255	255	1.86	80.892	1.658	88.577	100	11475	16	929	57.995	0.371	4.469
33	0.502	255	255	255	40.062	13.405	1.667	127.945	100	16575	454	163	71.565	0.549	3.03643
334	0.78	255	255	255	13.269	89.111	1.667	198.807	100	25755	148	1024	71.565	1.034	1.61219
21	0.324	255	255	255	23.847	8.949	1.679	82.672	100	10710	265	95	132.879	0.311	5.39871
78	0.27	255	255	255	30.202	25.488	1.679	68.894	100	8925	338	297	47.121	0.391	4.29412
283	0.255	255	255	255	46.093	80.374	1.679	64.957	100	8415	518	922	47.121	0.285	5.89123
308	0.672	255	255	255	66.453	83.364	1.69	171.25	100	22185	753	957	62.103	0.685	2.46715
69	0.301	255	255	255	7.965	23.432	1.726	76.767	100	9945	88	257	104.744	0.345	5.0029
200	0.509	255	255	255	47.6	49.917	1.726	129.914	100	16830	532	571	14.744	0.466	3.70386
41	0.401	255	255	255	3.842	16.117	1.731	102.356	100	13260	40	174	113.962	0.471	3.67516
211	0.54	255	255	255	43.853	52.4	1.731	137.787	100	17850	495	606	66.038	0.595	2.90924
233	0.409	255	255	255	17.481	61.809	1.733	104.325	100	13515	194	712	59.534	0.414	4.18599
39	0.409	255	255	255	42.09	15.534	1.751	104.325	100	13515	476	167	107.526	0.384	4.5599
61	0.455	255	255	255	37.315	20.049	1.751	116.135	100	15045	415	231	17.526	0.417	4.19904
217	0.386	255	255	255	18.589	54.775	1.751	98.419	100	12750	203	621	162.474	0.375	4.66933
50	0.726	255	255	255	37.462	17.041	1.766	185.029	100	23970	418	190	174.289	0.791	2.23262
331	0.934	233.926	0	255	6.752	88.371	1.768	218.491	91.736	28305	74	1016	63.435	1.133	1.56046
277	0.309	255	255	255	6.198	77.685	1.779	78.736	100	10200	65	892	57.095	0.422	4.21564
187	0.425	255	255	255	13.982	46.438	1.803	108.261	100	14025	152	536	43.025	0.47	3.83617
230	0.787	255	255	255	62.294	60.43	1.803	200.776	100	26010	704	697	43.025	0.96	1.87813
336	0.633	255	255	255	40.63	89.308	1.803	161.408	100	20910	457	1023	43.025	0.87	2.07241
53	0.672	255	255	255	4.704	18.331	1.811	171.25	100	22185	50	198	112.834	0.707	2.56153
218	0.44	255	255	255	47.7	55.278	1.811	112.198	100	14535	536	637	50.906	0.477	3.79665
317	0.594	255	255	255	2.658	86.079	1.811	151.566	100	19635	27	969	104.036	0.591	3.0643
326	0.409	255	255	255	4.84	87.556	1.835	104.325	100	13515	52	987	106.699	0.421	4.35867
155	0.54	255	255	255	57.362	35.407	1.847	137.787	100	17850	644	409	25.346	0.629	2.93641
282	0.563	255	255	255	13.289	80.52	1.847	143.692	100	18615	147	927	64.654	0.5	3.694
101	0.587	255	255	255	42.286	28.854	1.862	149.598	100	19380	478	339	70.71	0.471	3.95329
131	0.502	255	255	255	15.081	32.575	1.862	127.945	100	16575	168	381	70.71	0.417	4.46523
171	0.401	255	255	255	37.705	38.626	1.864	102.356	100	13260	429	429	98.13	0.511	3.64775
193	0.479	255	255	255	44.182	47.903	1.868	122.04	100	15810	494	552	41.186	0.504	3.70635
220	0.587	255	255	255	24.517	58.386	1.88	149.598	100	19380	275	673	52.595	0.634	2.9653
62	0.71	255	255	255	35.838	21.092	1.893	181.092	100	23460	402	230	111.801	0.639	2.96244
113	0.756	255	255	255	22.091	30.933	1.893	192.902	100	24990	246	361	68.199	0.727	2.60385
298	0.525	255	255	255	74.773	82.494	1.897	133.85	100	17340	849	949	76.608	0.41	4.62683
189	0.479	255	255	255	37.483	47.014	1.901	122.04	100	15810	420	544	56.31	0.521	3.64875
229	0.749	255	255	255	20.335	60.046	1.935	190.934	100	24735	224	692	50.528	0.562	3.44306
174	0.486	255	255	255	21.755	40.215	1.951	124.008	100	16065	247	446	97.765	0.351	5.5584
286	0.463	255	255	255	45.016	81.069	1.951	118.103	100	15300	505	931	54.162	0.52	3.75192
315	0.347	255	255	255	11.296	84.492	1.951	88.577	100	11475	121	971	54.162	0.4	4.8775
221	0.401	255	255	255	17.104	58.764	1.965	102.356	100	13260	193	659	100.305	0.439	4.47608
227	0.463	255	255	255	61.324	59.363	1.965	118.103	100	15300	687	674	169.695	0.388	5.06443
70	0.733	255	255	255	62.186	23.403	1.992	186.997	100	24225	699	274	48.576	0.559	3.56351
203	0.602	255	255	255	44.112	50.394	1.992	153.534	100	19890	492	581	41.424	0.529	3.7656
28	0.903	255	255	255	17.018	11.297	2.023	230.301	100	29835	187	119	124.38	0.663	3.05128
57	0.818	255	255	255	7.595	18.701	2.049	208.649	100	27030	80	204	120.964	0.755	2.71391
67	0.687	255	255	255	38.482	22.457	2.049	175.187	100	22695	432	246	120.964	0.659	3.10926
85	0.672	255	255	255	63.881	26.006	2.051	171.25	100	22185	719	304	43.264	0.966	2.12319
231	0.432	255	255	255	72.633	61.405	2.057	110.23	100	14280	823	709	70.017	0.44	4.675
13	0.448	255	255	255	6.435	5.565	2.068	114.167	100	14790	71	53	102.265	0.377	5.48541
34	0.625	255	255	255	37.361	13.826	2.068	159.439	100	20655	423	146	102.265	0.482	4.29046
207	0.533	255	255	255	55.559	51.136	2.083	135.819	100	17595	621	580	152.354	0.869	2.39701
20	0.579	255	255	255	14.021	9.375	2.088	147.629	100	19125	157	95	104.621	0.476	4.38655
309	0.417	255	255	255	5.818	83.729	2.088	106.293	100	13770	61	965	67.751	0.389	5.36761
116	0.44	255	255	255	36.354	30.767	2.116	112.198	100	14535	407	342	131.634	0.548	3.86131
275	1.22	255	255	255	52.851	76.793	2.116	311.005	100	40290	594	885	48.366	1.118	1.89267
295	0.71	255	255	255	47.438	82.283	2.116	181.092	100	23460	533	928	131.634	0.905	2.33812
302	0.587	255	255	255	0.654	83.095	2.127	149.598	100	19380	0	956	51.71	0.497	4.27968
30	0.756	255	255	255	39.359	12.359	2.138	192.902	100	24990	446	152	80.538	0.791	2.70291
58	0.741	255	255	255	18.669	18.974	2.138	188.965	100	24480	211	204	99.462	0.507	4.21696
138	0.988	255	255	255	24.948	33.843	2.14	251.954	100	32640	281	397	70.821	1.054	2.03036
209	0.679	255	255	255	30.966	51.694	2.17	173.218	100	22440	341	593	21.371	0.627	3.46093
210	0.563	255	255	255	35.127	52.289	2.196	143.692	100	18615	396	606	73.74	0.472	4.65254
102	0.726	255	255	255	27.404	29.479	2.202	185.029	100	23970	306	345	61.39	0.793	2.7768
108	1.235	255	255	255	19.759	29.942	2.202	314.942	100	40800	221	353	61.39	1.218	1.80788
134	1.196	246.774	0	255	42.108	33.213	2.202	295.258	96.774	38250	470	370	151.39	1.305	1.68736
141	0.525	251.25	0	255	64.787	34.003	2.25	131.882	98.529	17085	730	394	51.34	0.829	2.71411
235	0.432	255	255	255	68.447	63.006	2.267	110.23	100	14280	772	707	125.538	0.414	5.47585
128	1.397	243.729	0	255	29.546	32.505	2.279	340.531	95.58	44115	328	358	117.553	1.152	1.9783
14	0.594	255	255	255	17.775	6.566	2.281	151.566	100	19635	198	62	105.642	0.452	5.04646
261	1.119	251.483	0	255	56.51	71.821	2.281	281.48	98.621	36465	629	824	15.642	1.277	1.78622
258	0.756	255	255	255	73.323	69.204	2.291	192.902	100	24990	825	795	32.471	0.973	2.35457
19	0.903	255	255	255	18.109	9.395	2.321	230.301	100	29835	199	94	119.476	0.686	3.38338
72	0.795	255	255	255	18.062	23.095	2.326	202.744	100	26265	192	266	10.886	0.501	4.64271
84	0.772	255	255	255	62.548	26.25	2.339	196.839	100	25500	705	310	55.713	0.671	3.48584
186	1.034	255	255	255	40.306	46.797	2.339	263.764	100	34170	455	520	124.287	1.137	2.05717
83	0.911	252.839	0	255	43.297	26.436	2.344	230.301	99.153	29835	488	313	77.005	1.286	1.82271
49	0.664	255	255	255	0.608	17.507	2.357	169.281	100	21930	0	187	116.565	0.707	3.3338
339	0.641	255	255	255	2.753	89.502	2.357	163.376	100	21165	21	1012	153.435	0.847	2.78276
80	1.212	255	255	255	25.253	26.066	2.364	309.037	100	40035	277	305	41.987	0.793	2.98108
22	0.579	255	255	255	34.284	9.55	2.366	147.629	100	19125	383	120	58.671	0.41	5.77073
232	0.517	255	255	255	24.756	61.659	2.366	131.882	100	17085	280	715	74.932	0.556	4.2554
122	0.718	255	255	255	43.279	31.771	2.387	183.06	100	23715	493	376	83.66	0.852	2.80164
25	0.502	255	255	255	37.845	10.209	2.39	127.945	100	16575	427	103	107.103	0.361	6.6205
63	0.811	255	255	255	65.312	21.494	2.39	206.681	100	26775	737	258	53.973	0.863	2.76941
265	1.104	255	255	255	75	75.059	2.398	281.48	100	36465	850	843	98.427	0.891	2.69136
291	0.756	255	255	255	62.477	81.115	2.398	192.902	100	24990	699	916	151.557	0.812	2.9532
292	0.702	255	255	255	65.938	81.083	2.398	179.123	100	23205	737	923	171.573	0.766	3.13055
206	1.173	255	255	255	52.43	51.91	2.4	299.195	100	38760	593	602	66.251	0.863	2.781
263	1.158	255	255	255	28.258	73.257	2.4	295.258	100	38250	316	822	113.749	0.694	3.45821
98	0.494	255	255	255	23.646	28.897	2.413	125.977	100	16320	262	341	56.889	0.466	5.17811
23	0.787	255	255	255	38.883	9.79	2.43	200.776	100	26010	439	126	77.471	0.618	3.93204
216	1.119	255	255	255	45.98	55.356	2.43	285.416	100	36975	517	643	77.471	1.09	2.22936
97	0.641	255	255	255	64.432	28.529	2.441	163.376	100	21165	727	338	59.744	0.629	3.88076
180	0.803	255	255	255	3.762	43.135	2.443	204.712	100	26520	35	502	52.306	0.656	3.72409
310	0.71	255	255	255	11.953	83.622	2.48	181.092	100	23460	129	943	112.932	1.174	2.11244
288	0.718	255	255	255	73.488	81.579	2.485	183.06	100	23715	834	942	81.87	0.475	5.23158
152	0.818	255	255	255	63.936	35.585	2.548	208.649	100	27030	719	416	43.603	0.719	3.54381
248	1.335	253.526	0	255	71.432	67.191	2.566	338.563	99.422	43860	802	752	128.047	1.432	1.7919
318	0.687	255	255	255	48.139	86.079	2.584	175.187	100	22695	537	989	35.311	0.536	4.8209
166	0.625	255	255	255	21.774	37.717	2.594	159.439	100	20655	234	437	28.301	0.536	4.83955
86	1.521	255	255	255	17.921	26.795	2.612	387.773	100	50235	196	317	70.346	1.476	1.76965
323	0.718	255	255	255	26.583	86.935	2.633	183.06	100	23715	289	996	25.71	0.461	5.7115
328	1.22	255	255	255	38.46	88.081	2.656	311.005	100	40290	430	1018	55.784	1.243	2.13677
3	0.895	255	255	255	21.831	1.698	2.678	228.333	100	29580	240	29	41.009	0.861	3.11034
223	0.579	255	255	255	69.839	58.744	2.695	147.629	100	19125	778	677	19.026	0.696	3.87213
276	1.104	255	255	255	74.496	77.626	2.736	281.48	100	36465	846	900	84.472	0.615	4.44878
319	0.919	255	255	255	3.299	86.882	2.736	234.238	100	30345	36	1005	84.472	0.739	3.7023
169	1.498	255	255	255	28.068	38.886	2.752	381.867	100	49470	316	428	106.699	1.406	1.95733
2	0.996	255	255	255	72.003	1.306	2.791	253.922	100	32895	809	0	118.179	0.881	3.16799
16	1.683	249.151	0	255	35.799	8.234	2.792	419.267	97.706	54315	404	110	65.854	1.049	2.66158
281	1.243	255	255	255	71.875	79.923	2.803	316.911	100	41055	807	921	32.196	1.277	2.19499
212	0.942	255	255	255	51.185	53.232	2.813	240.143	100	31110	573	591	104.47	1.279	2.19937
313	0.687	255	255	255	68.837	83.994	2.869	175.187	100	22695	770	963	27.35	0.563	5.09591
95	2.864	255	255	255	49.456	28.649	2.921	730.272	100	94605	560	343	83.089	2.61	1.11916
150	1.853	255	255	255	62.16	36.097	2.973	472.413	100	61200	704	425	71.03	1.74	1.70862
272	0.71	255	255	255	12.905	76.439	3.005	181.092	100	23460	142	886	74.745	0.448	6.70759
107	2.246	254.124	0	255	53.485	30.538	3.033	570.833	99.656	73950	602	329	100.008	1.668	1.81835
43	0.996	255	255	255	39.241	16.232	3.095	253.922	100	32895	433	178	145.408	0.78	3.96795
303	2.501	254.213	0	255	41.915	84.027	3.114	635.79	99.691	82365	475	973	73.61	2.046	1.52199
184	2.038	255	255	255	33.352	46.272	3.175	519.655	100	67320	364	529	14.421	1.477	2.14963
119	1.968	255	255	255	50.8	30.926	3.193	501.939	100	65025	559	351	7.907	1.338	2.3864
160	2.447	243.738	0	255	30.782	37.344	3.207	596.422	95.584	77265	350	406	99.462	2.183	1.46908
136	1.251	255	255	255	51.166	33.443	3.256	318.879	100	41310	565	379	176.906	1.142	2.85114
35	1.104	255	255	255	19.169	14.428	3.357	281.48	100	36465	200	163	6.009	0.757	4.43461
37	1.127	255	255	255	4.683	15.786	3.437	287.385	100	37230	53	160	94.399	0.715	4.80699
132	2.323	255	255	255	22.419	33.168	3.485	592.485	100	76755	237	394	56.31	2.503	1.39233
12	1.498	255	255	255	20.54	5.55	3.488	381.867	100	49470	222	49	130.914	0.905	3.85414
105	1.166	255	255	255	60.744	29.656	3.534	297.227	100	38505	675	350	34.875	0.943	3.74761
87	1.459	255	255	255	19.634	27.419	3.542	372.025	100	48195	211	330	60.255	0.798	4.4386
202	2.91	255	255	255	41.304	50.697	3.584	742.083	100	96135	451	566	168.69	1.845	1.94255
176	1.034	255	255	255	36.36	41.346	3.605	263.764	100	34170	397	486	43.025	0.587	6.1414
267	2.107	255	255	255	48.081	76.32	3.641	537.37	100	69615	542	889	81.674	1.753	2.07701
77	1.999	255	255	255	57.981	26.096	3.738	509.813	100	66045	654	317	66.448	1.802	2.07436
73	0.88	255	255	255	2.13	24.073	3.746	224.396	100	29070	8	293	50.711	0.745	5.02819
145	1.559	255	255	255	18.06	35.282	3.918	397.615	100	51510	198	426	70.346	0.819	4.78388
92	1.652	255	255	255	29.457	28.849	4.015	421.235	100	54570	328	349	66.801	0.881	4.55732
158	1.258	255	255	255	19.141	37.368	4.065	320.847	100	41565	216	405	96.203	0.59	6.88983
226	2.254	255	255	255	70.268	60.597	4.298	574.77	100	74460	779	706	49.145	1.718	2.50175
157	2.1	255	255	255	60.177	37.763	4.396	535.402	100	69360	684	404	92.291	1.36	3.23235
129	1.752	255	255	255	17.164	33.176	4.516	446.824	100	57885	179	399	52.907	0.78	5.78974
93	3.227	255	255	255	56.385	28.394	4.756	822.787	100	106590	617	326	11.725	2.201	2.16084
185	2.617	255	255	255	55.237	47.298	4.794	667.284	100	86445	613	559	48.715	2.186	2.19305
245	2.756	255	255	255	57.214	66.004	4.911	702.715	100	91035	628	772	42.825	2.047	2.39912
153	2.694	255	255	255	24.917	36.37	4.973	686.968	100	88995	263	429	32.005	2.225	2.23506
162	5.164	214.215	0	255	39.379	37.579	4.996	1106.23	84.006	143310	435	459	55.751	2.561	1.9508
82	5.45	247.776	0	255	46.624	27.595	5.033	1350.32	97.167	174930	522	286	106.22	3.118	1.61418
234	3.69	255	255	255	60.969	62.906	5.19	940.89	100	121890	662	719	2.911	1.343	3.86448
233	0.224	255	255	255	61.784	74.079	0.634	57.083	100	7395	700	845	33.69	0.527	1.20304
285	0.201	255	255	255	48.015	85.733	0.64	51.178	100	6630	543	977	15.945	0.527	1.21442
13	0.201	255	255	255	87.136	8.063	0.669	51.178	100	6630	990	95	66.801	0.439	1.52392
11	0.232	255	255	255	57.07	4.882	0.708	59.052	100	7650	648	52	119.745	0.439	1.61276
33	0.27	255	255	255	12.043	17.523	0.708	68.894	100	8925	135	196	119.745	0.527	1.34345
105	0.309	255	255	255	14.382	37.478	0.708	78.736	100	10200	162	423	119.745	0.615	1.15122
193	0.301	255	255	255	55.803	56.093	0.708	76.767	100	9945	632	636	150.255	0.615	1.15122
278	0.278	255	255	255	35.217	84.823	0.708	70.862	100	9180	399	969	60.255	0.615	1.15122
118	0.216	255	255	255	60.864	40.12	0.725	55.115	100	7140	691	461	75.964	0.517	1.40232
296	0.201	255	255	255	17.845	89.177	0.725	51.178	100	6630	202	1011	104.036	0.351	2.06553
274	0.247	255	255	255	70.446	83.537	0.751	62.988	100	8160	800	955	69.444	0.527	1.42505
87	0.286	255	255	255	8.77	33.865	0.756	72.83	100	9435	97	389	54.462	0.527	1.43454
256	0.262	255	255	255	52.299	79.453	0.786	66.925	100	8670	591	906	26.565	0.511	1.53816
264	0.232	255	255	255	30.806	81.337	0.786	59.052	100	7650	348	922	116.565	0.463	1.69762
9	0.208	255	255	255	58.161	4.193	0.796	53.146	100	6885	661	43	96.34	0.439	1.81321
1	0.216	255	255	255	6.241	0.213	0.81	55.115	100	7140	68	6	40.601	0.487	1.66324
6	0.239	255	255	255	31.529	1.81	0.81	61.02	100	7905	355	20	167.471	0.527	1.537
57	0.363	255	255	255	27.439	22.083	0.81	92.514	100	11985	309	248	130.601	0.615	1.31707
60	0.232	255	255	255	28.384	22.363	0.81	59.052	100	7650	319	253	167.471	0.457	1.77243
203	0.324	255	255	255	65.053	59.254	0.81	82.672	100	10710	737	671	130.601	0.615	1.31707
271	0.316	255	255	255	72.879	82.728	0.81	80.704	100	10455	826	945	40.601	0.615	1.31707
291	0.239	255	255	255	64.325	87.838	0.81	61.02	100	7905	729	996	130.601	0.527	1.537
292	0.247	255	255	255	1.496	88.07	0.81	62.988	100	8160	16	998	102.529	0.559	1.44902
12	0.286	255	255	255	56.858	7.88	0.829	72.83	100	9435	645	86	122.005	0.527	1.57306
97	0.316	255	255	255	20.294	36.259	0.829	80.704	100	10455	227	410	147.995	0.589	1.40747
225	0.255	255	255	255	46.519	71.715	0.834	64.957	100	8415	525	815	161.565	0.511	1.63209
255	0.216	255	255	255	18.212	79.503	0.834	55.115	100	7140	206	901	108.435	0.351	2.37607
279	0.201	255	255	255	57.45	84.865	0.834	51.178	100	6630	649	966	161.565	0.523	1.59465
47	0.278	255	255	255	57.579	20.635	0.865	70.862	100	9180	650	232	156.038	0.671	1.28912
173	0.309	255	255	255	42.065	48.281	0.865	78.736	100	10200	474	551	23.962	0.439	1.97039
86	0.201	255	255	255	55.709	33.68	0.87	51.178	100	6630	631	387	45	0.414	2.10145
190	0.44	255	255	255	26.867	53.741	0.879	112.198	100	14535	302	608	126.87	0.703	1.25036
222	0.363	255	255	255	42.072	70.628	0.879	92.514	100	11985	475	801	143.13	0.629	1.39746
123	0.224	255	255	255	44.331	40.923	0.905	57.083	100	7395	500	463	150.945	0.389	2.32648
159	0.232	255	255	255	1.959	45.476	0.905	59.052	100	7650	17	515	150.945	0.615	1.47154
297	0.394	240	0	255	2.216	89.369	0.917	94.483	94.118	12240	21	1014	163.301	0.668	1.37275
153	0.247	255	255	255	62.797	44.468	0.934	62.988	100	8160	711	503	131.186	0.551	1.6951
196	0.255	255	255	255	5.481	57.522	0.934	64.957	100	8415	59	650	138.814	0.607	1.53871
248	0.262	255	255	255	58.594	77.892	0.934	66.925	100	8670	664	882	131.186	0.463	2.01728
72	0.486	255	255	255	36.141	27.312	0.946	124.008	100	16065	409	306	111.801	0.778	1.21594
148	0.208	255	255	255	68.424	44.042	0.946	53.146	100	6885	777	496	111.801	0.351	2.69516
281	0.278	255	255	255	18.111	85.018	0.946	70.862	100	9180	202	969	21.801	0.703	1.34566
48	0.378	255	255	255	10.451	20.87	0.95	96.451	100	12495	116	233	123.69	0.629	1.51033
124	0.309	255	255	255	75.561	40.973	0.95	78.736	100	10200	855	464	146.31	0.487	1.95072
73	0.278	255	255	255	85.877	27.422	0.982	70.862	100	9180	972	311	169.695	0.439	2.2369
107	0.479	255	255	255	57.438	38.204	0.982	122.04	100	15810	651	430	116.565	0.703	1.39687
212	0.255	255	255	255	36.833	62.709	0.982	64.957	100	8415	416	709	116.565	0.432	2.27315
258	0.247	255	255	255	49.95	80.031	0.982	62.988	100	8160	566	916	63.435	0.408	2.40686
50	0.34	255	255	255	75.405	21.228	1.002	86.609	100	11220	857	235	105.255	0.681	1.47137
51	0.301	255	255	255	11.441	21.238	1.002	76.767	100	9945	127	237	127.875	0.435	2.30345
130	0.208	255	255	255	1.609	41.686	1.002	53.146	100	6885	15	470	127.875	0.357	2.80672
238	0.286	255	255	255	37.925	75.32	1.002	72.83	100	9435	428	853	127.875	0.435	2.30345
206	0.378	255	255	255	48.343	60.381	1.025	96.451	100	12495	547	682	120.964	0.559	1.83363
273	0.417	255	255	255	0.288	83.596	1.025	106.293	100	13770	0	957	59.036	0.615	1.66667
286	0.409	255	255	255	21.704	86.228	1.025	104.325	100	13515	242	978	149.036	0.611	1.67758
289	0.247	255	255	255	2.858	87.128	1.025	62.988	100	8160	29	997	59.036	0.668	1.53443
133	0.247	255	255	255	75.465	41.829	1.028	62.988	100	8160	857	482	70.017	0.384	2.67708
169	0.309	255	255	255	37.103	47.984	1.028	78.736	100	10200	417	544	160.017	0.425	2.41882
181	0.232	255	255	255	33.287	51.017	1.028	59.052	100	7650	377	575	109.983	0.341	3.01466
221	0.262	255	255	255	62.475	68.943	1.028	66.925	100	8670	706	782	160.017	0.469	2.1919
205	0.255	255	255	255	50.278	60.025	1.058	64.957	100	8415	568	679	138.366	0.414	2.55556
250	0.247	255	255	255	64.914	78.348	1.058	62.988	100	8160	735	897	41.634	0.435	2.43218
207	0.401	255	255	255	45.827	60.665	1.062	102.356	100	13260	517	696	65.556	0.821	1.29354
71	0.286	255	255	255	84.519	27.188	1.069	72.83	100	9435	961	304	99.462	0.351	3.04558
45	0.216	255	255	255	55.863	19.668	1.072	55.115	100	7140	631	221	145.008	0.354	3.02825
219	0.201	255	255	255	83.571	66.35	1.072	51.178	100	6630	946	752	145.008	0.334	3.20958
288	0.216	255	255	255	63.629	87.087	1.072	55.115	100	7140	721	986	124.992	0.366	2.92896
295	0.386	255	255	255	15.95	89.05	1.072	98.419	100	12750	177	1018	34.992	0.788	1.36041
2	0.378	255	255	255	81.582	0.455	1.101	96.451	100	12495	926	11	61.39	0.55	2.00182
3	0.679	255	255	255	44.13	1.181	1.101	173.218	100	22440	499	8	118.61	0.932	1.18133
223	0.363	255	255	255	68.129	71.247	1.101	92.514	100	11985	770	808	151.39	0.489	2.25153
94	0.293	255	255	255	21.599	35.571	1.111	74.799	100	9690	240	409	18.435	0.597	1.86097
183	0.262	255	255	255	72.889	52.235	1.111	66.925	100	8670	823	592	161.565	0.39	2.84872
55	0.255	255	255	255	52.317	21.713	1.118	64.957	100	8415	591	243	135	0.373	2.99732
262	0.232	255	255	255	47.441	81.155	1.118	59.052	100	7650	535	919	135	0.404	2.76733
39	0.463	255	255	255	21.498	18.488	1.125	118.103	100	15300	241	216	51.34	0.751	1.498
83	0.293	255	255	255	16.215	32.718	1.125	74.799	100	9690	180	368	141.34	0.373	3.01609
137	0.34	255	255	255	34.78	42.312	1.125	86.609	100	11220	390	478	141.34	0.487	2.31006
172	0.34	255	255	255	38.738	48.47	1.125	86.609	100	11220	437	547	141.34	0.527	2.13472
176	0.479	255	255	255	62.133	48.766	1.125	122.04	100	15810	702	550	128.66	0.704	1.59801
143	0.247	255	255	255	10.167	43.303	1.142	62.988	100	8160	113	486	112.62	0.405	2.81975
293	0.44	255	255	255	30.061	88.613	1.142	112.198	100	14535	339	1003	112.62	0.527	2.16698
145	0.224	255	255	255	37.996	43.331	1.146	57.083	100	7395	427	490	147.529	0.341	3.3607
290	0.201	255	255	255	18.893	87.43	1.146	51.178	100	6630	210	991	147.529	0.403	2.84367
53	0.247	255	255	255	65.609	21.061	1.156	62.988	100	8160	740	241	8.746	0.351	3.29345
155	0.27	255	255	255	60.132	44.654	1.156	68.894	100	8925	679	507	171.254	0.351	3.29345
152	0.61	255	255	255	42.806	44.377	1.179	155.503	100	20145	481	508	26.565	0.788	1.49619
187	0.224	255	255	255	38.008	53.501	1.182	57.083	100	7395	428	604	131.987	0.311	3.80064
247	0.301	255	255	255	59.898	77.889	1.182	76.767	100	9945	677	881	131.987	0.435	2.71724
7	0.517	255	255	255	82.395	2.417	1.195	131.882	100	17085	931	24	143.973	0.787	1.51842
136	0.394	255	255	255	66.426	42.108	1.195	100.388	100	13005	750	475	143.973	0.497	2.40443
198	0.286	255	255	255	0.481	57.8	1.195	72.83	100	9435	0	653	143.973	0.522	2.28927
214	0.556	255	255	255	58.828	63.174	1.195	141.724	100	18360	666	712	107.103	0.703	1.69986
243	0.448	255	255	255	24.538	77.101	1.195	114.167	100	14790	274	873	143.973	0.56	2.13393
25	0.27	255	255	255	8.566	15.065	1.221	68.894	100	8925	92	168	149.744	0.419	2.91408
100	0.201	255	255	255	26.165	37.188	1.221	51.178	100	6630	294	429	59.744	0.294	4.15306
210	0.332	255	255	255	59.244	61.968	1.221	84.641	100	10965	669	702	149.744	0.483	2.52795
242	0.371	255	255	255	60.742	76.329	1.224	94.483	100	12240	686	866	158.962	0.439	2.78815
270	0.656	255	255	255	29.963	82.38	1.224	167.313	100	21675	334	940	21.038	0.791	1.54741
171	0.239	255	255	255	2.226	48.687	1.233	61.02	100	7905	25	547	94.086	0.264	4.67045
81	0.309	255	255	255	16.212	30.88	1.249	78.736	100	10200	179	346	140.711	0.435	2.87126
95	0.316	255	255	255	33.207	36.233	1.249	80.704	100	10455	374	407	129.289	0.435	2.87126
70	0.239	255	255	255	49.741	26.815	1.258	61.02	100	7905	565	300	102.095	0.351	3.58405
75	0.409	255	255	255	50.982	28.326	1.258	104.325	100	13515	577	315	102.095	0.615	2.04553
158	0.363	255	255	255	8.553	45.287	1.258	92.514	100	11985	94	510	114.775	0.522	2.40996
287	0.27	255	255	255	1.465	86.864	1.258	68.894	100	8925	16	982	102.095	0.527	2.3871
4	0.216	255	255	255	80.281	1.563	1.279	55.115	100	7140	912	25	74.055	0.306	4.17974
146	0.278	255	255	255	64.864	43.939	1.279	70.862	100	9180	736	507	74.055	0.439	2.91344
30	0.27	255	255	255	66.161	16.835	1.297	68.894	100	8925	750	199	61.699	0.446	2.90807
116	0.463	255	255	255	66.604	40.327	1.297	118.103	100	15300	756	452	118.301	0.804	1.61318
252	0.255	255	255	255	49.397	78.93	1.297	64.957	100	8415	555	895	151.699	0.393	3.30025
120	0.255	255	255	255	21.098	40.411	1.306	64.957	100	8415	233	458	160.346	0.341	3.82991
195	0.232	255	255	255	0.627	57.184	1.306	59.052	100	7650	2	646	137.726	0.373	3.50134
237	0.324	255	255	255	39.61	74.929	1.306	82.672	100	10710	444	850	160.346	0.405	3.22469
254	0.378	249.796	0	255	46.398	79.454	1.306	94.483	97.959	12240	523	899	132.274	0.48	2.72083
269	0.232	255	255	255	51.605	81.946	1.306	59.052	100	7650	582	928	137.726	0.311	4.19936
42	0.262	255	255	255	76.517	19.419	1.318	66.925	100	8670	866	225	36.87	0.375	3.51467
267	0.54	255	255	255	56.286	81.967	1.33	137.787	100	17850	641	926	97.595	0.703	1.89189
131	0.525	255	255	255	55.227	41.689	1.338	133.85	100	17340	622	471	156.801	0.604	2.21523
257	0.54	255	255	255	41.807	79.903	1.341	137.787	100	17850	469	906	148.392	0.603	2.22388
104	0.232	255	255	255	57.017	37.196	1.344	59.052	100	7650	642	422	168.69	0.264	5.09091
215	0.286	255	255	255	1.958	64.01	1.367	72.83	100	9435	17	724	135	0.435	3.14253
8	0.587	255	255	255	56.896	3.083	1.372	149.598	100	19380	643	40	50.194	0.991	1.38446
251	0.301	255	255	255	47.368	78.896	1.372	76.767	100	9945	534	905	50.194	0.432	3.17593
14	0.262	255	255	255	8.982	9.212	1.375	66.925	100	8670	95	101	153.435	0.323	4.25697
23	0.54	255	255	255	22.665	13.941	1.389	137.787	100	17850	252	155	145.305	0.668	2.07934
34	0.509	255	255	255	23.4	18.115	1.389	129.914	100	16830	260	200	108.435	0.872	1.59289
208	0.293	255	255	255	0.386	60.835	1.389	74.799	100	9690	0	686	124.695	0.368	3.77446
66	0.432	255	255	255	36.294	25.306	1.417	110.23	100	14280	406	284	150.255	0.464	3.05388
128	0.409	255	255	255	60.01	41.677	1.417	104.325	100	13515	675	471	150.255	0.806	1.75806
15	0.262	255	255	255	3.375	9.29	1.419	66.925	100	8670	31	103	158.199	0.339	4.18584
140	0.286	255	255	255	18.518	42.392	1.419	72.83	100	9435	203	480	158.199	0.361	3.93075
245	0.378	255	255	255	55.382	77.914	1.419	96.451	100	12495	627	895	68.199	0.441	3.21769
31	0.347	255	255	255	24.635	17.106	1.43	88.577	100	11475	274	189	137.49	0.412	3.47087
98	0.34	255	255	255	78.116	36.563	1.43	86.609	100	11220	881	417	10.62	0.376	3.80319
138	0.332	255	255	255	59.214	42.263	1.43	84.641	100	10965	666	481	169.38	0.555	2.57658
230	0.255	255	255	255	59.657	74.016	1.43	64.957	100	8415	673	837	137.49	0.391	3.65729
168	0.309	255	255	255	6.181	48.25	1.441	78.736	100	10200	65	543	127.569	0.341	4.22581
188	0.378	255	255	255	66.232	53.561	1.441	96.451	100	12495	747	605	142.431	0.467	3.08565
282	0.34	255	255	255	53.163	85.427	1.441	86.609	100	11220	600	965	127.569	0.414	3.48068
185	0.363	255	255	255	15.057	53.159	1.449	92.514	100	11985	170	598	104.036	0.465	3.11613
277	0.363	255	255	255	65.035	84.667	1.454	92.514	100	11985	737	956	115.017	0.611	2.37971
90	0.255	255	255	255	79.641	34.738	1.462	64.957	100	8415	902	388	122.735	0.327	4.47095
240	0.594	255	255	255	55.335	76.167	1.462	151.566	100	19635	622	863	147.265	0.663	2.20513
49	0.255	255	255	255	78.355	21.173	1.473	64.957	100	8415	889	249	72.646	0.331	4.45015
74	0.525	255	255	255	35.654	28.094	1.494	133.85	100	17340	401	312	118.072	0.528	2.82955
213	0.378	255	255	255	2.628	62.754	1.494	96.451	100	12495	23	710	151.928	0.439	3.40319
40	0.563	255	255	255	18.258	18.961	1.496	143.692	100	18615	203	224	49.764	0.994	1.50503
249	0.509	255	255	255	52.602	77.939	1.517	129.914	100	16830	590	885	169.992	0.527	2.87856
184	0.355	255	255	255	71.983	52.713	1.537	90.546	100	11730	812	596	149.036	0.407	3.77641
79	0.247	255	255	255	8.915	30.105	1.554	62.988	100	8160	95	337	137.291	0.311	4.99678
246	0.286	255	255	255	56.537	77.951	1.554	72.83	100	9435	637	881	137.291	0.311	4.99678
191	0.548	255	255	255	76.325	55.03	1.572	139.756	100	18105	860	625	153.435	0.927	1.69579
192	0.973	255	255	255	48.077	56.248	1.572	248.017	100	32130	538	643	26.565	0.904	1.73894
276	0.371	255	255	255	59.217	84.381	1.572	94.483	100	12240	670	952	116.565	0.471	3.33758
27	0.455	255	255	255	20.417	15.985	1.584	116.135	100	15045	224	179	160.56	0.414	3.82609
180	0.324	255	255	255	3.035	50.615	1.584	82.672	100	10710	32	568	109.44	0.353	4.48725
211	0.409	255	255	255	5.156	62.243	1.584	104.325	100	13515	51	703	146.31	0.58	2.73103
91	0.34	255	255	255	8.776	34.902	1.613	86.609	100	11220	95	390	119.358	0.393	4.10433
65	0.371	255	255	255	12.297	25.133	1.62	94.483	100	12240	133	278	130.601	0.435	3.72414
10	0.378	255	255	255	68.158	5.011	1.634	96.451	100	12495	770	49	126.254	0.422	3.87204
110	0.594	255	255	255	42.513	38.838	1.634	151.566	100	19635	477	437	143.746	0.584	2.79795
194	0.563	255	255	255	43.95	57.043	1.634	143.692	100	18615	492	643	143.746	0.629	2.59777
261	0.401	255	255	255	28.659	80.96	1.634	102.356	100	13260	320	915	126.254	0.506	3.22925
177	0.394	255	255	255	77.336	49.145	1.641	100.388	100	13005	877	551	105.524	0.426	3.85211
29	0.486	255	255	255	4.08	16.522	1.651	124.008	100	16065	41	181	115.201	0.75	2.20133
18	0.803	255	255	255	11.084	11.937	1.658	204.712	100	26520	122	128	122.005	0.746	2.22252
52	0.726	255	255	255	22.268	21.693	1.658	185.029	100	23970	246	253	32.005	0.943	1.75822
275	0.687	255	255	255	55.848	84.208	1.658	175.187	100	22695	630	966	57.995	0.796	2.08291
59	0.494	255	255	255	47.731	22.82	1.679	125.977	100	16320	542	250	96.009	0.615	2.73008
69	0.301	255	255	255	37.62	26.712	1.679	76.767	100	9945	422	297	132.879	0.311	5.39871
161	0.926	255	255	255	30.039	46.305	1.679	236.207	100	30600	334	519	132.879	1.033	1.62536
64	0.548	255	255	255	73.683	24.988	1.69	139.756	100	18105	835	293	62.103	0.62	2.72581
179	0.517	255	255	255	35.559	49.095	1.69	131.882	100	17085	395	557	171.027	0.351	4.81481
96	0.44	255	255	255	55.366	36.567	1.726	112.198	100	14535	627	408	104.744	0.422	4.09005
162	0.602	255	255	255	2.326	46.972	1.726	153.534	100	19890	24	525	104.744	0.518	3.33205
241	0.463	255	255	255	40.081	76.124	1.731	118.103	100	15300	447	862	156.038	0.471	3.67516
157	0.726	255	255	255	38.716	45.3	1.74	185.029	100	23970	435	509	135	1.309	1.32926
139	0.386	255	255	255	39.146	42.703	1.744	98.419	100	12750	438	479	139.086	0.51	3.41961
272	0.965	255	255	255	33.465	83.757	1.744	246.049	100	31875	374	947	130.914	0.932	1.87124
260	1.073	245.827	0	255	23.794	80.654	1.751	263.764	96.403	34170	266	909	107.526	1.175	1.49021
129	0.71	235.598	0	255	65.109	41.974	1.757	167.313	92.391	21675	735	488	53.13	1.135	1.54802
244	0.409	255	255	255	74.291	77.658	1.768	104.325	100	13515	841	893	63.435	0.356	4.96629
21	0.587	255	255	255	6.569	12.886	1.779	149.598	100	19380	70	138	122.905	0.487	3.65298
82	0.517	255	255	255	75.487	30.964	1.803	131.882	100	17085	851	360	43.025	0.497	3.62777
182	0.548	255	255	255	67.439	51.887	1.809	139.756	100	18105	759	585	150.945	0.471	3.84076
202	0.648	255	255	255	49.012	59.176	1.809	165.345	100	21420	548	669	150.945	1	1.809
37	0.772	255	255	255	15.953	18.587	1.828	196.839	100	25500	173	206	144.782	0.785	2.32866
119	0.548	255	255	255	67.928	40.721	1.828	139.756	100	18105	767	454	125.218	0.504	3.62698
54	0.417	255	255	255	24.067	21.587	1.835	106.293	100	13770	264	243	163.301	0.387	4.7416
204	0.865	255	255	255	56.461	60.29	1.847	220.46	100	28560	639	676	115.346	0.994	1.85815
117	0.371	255	255	255	42.652	40.331	1.853	94.483	100	12240	476	453	148.57	0.373	4.96783
170	0.425	255	255	255	44.833	48.481	1.853	108.261	100	14025	502	546	148.57	0.432	4.28935
186	0.363	255	255	255	83.039	53.126	1.868	92.514	100	11985	937	598	138.814	0.311	6.00643
294	0.394	255	255	255	36.979	89.052	1.868	100.388	100	13005	411	1008	138.814	0.829	2.25332
165	0.44	255	255	255	31.991	47.169	1.88	112.198	100	14535	356	531	142.595	0.39	4.82051
101	0.371	255	255	255	41.198	37.598	1.886	94.483	100	12240	464	419	117.759	0.354	5.32768
201	0.826	255	255	255	0.424	59.17	1.897	210.618	100	27285	3	665	103.392	1.142	1.66112
114	0.726	255	255	255	40.686	39.822	1.927	185.029	100	23970	455	446	133.152	0.62	3.10806
93	0.772	255	255	255	30.762	35.293	1.929	196.839	100	25500	342	397	149.931	0.707	2.72843
144	0.795	255	255	255	22.398	43.665	1.929	202.744	100	26265	244	504	30.069	1.436	1.34331
226	0.988	255	255	255	39.477	72.696	1.929	251.954	100	32640	444	819	120.069	0.781	2.46991
266	0.448	255	255	255	58.987	82.022	1.951	114.167	100	14790	665	946	82.235	1.016	1.92028
127	0.926	255	255	255	57.936	42.509	1.974	236.207	100	30600	651	488	57.724	1.439	1.37179
174	0.594	255	255	255	25.25	49.235	2.003	151.566	100	19635	283	570	74.745	0.513	3.90448
56	0.463	255	255	255	30.513	22.397	2.023	118.103	100	15300	340	245	124.38	0.39	5.18718
41	0.741	255	255	255	12.342	19.336	2.044	188.965	100	24480	128	215	154.537	0.749	2.72897
67	0.548	255	255	255	50.091	25.792	2.044	139.756	100	18105	566	284	115.463	0.464	4.40517
150	0.834	255	255	255	27.318	44.439	2.051	212.586	100	27540	304	497	133.264	0.641	3.19969
167	0.571	255	255	255	33.392	47.631	2.051	145.661	100	18870	370	534	133.264	0.651	3.15054
231	0.718	255	255	255	39.552	74.198	2.057	183.06	100	23715	441	838	160.017	0.82	2.50854
166	0.888	255	255	255	38.544	47.248	2.096	226.365	100	29325	428	531	146.976	0.649	3.22958
85	0.594	255	255	255	36.731	33.96	2.112	151.566	100	19635	408	380	163.072	0.771	2.7393
68	0.324	255	255	255	83.163	26.065	2.116	82.672	100	10710	938	306	48.366	0.287	7.37282
234	1.104	255	255	255	58.386	74.54	2.161	281.48	100	36465	652	855	26.565	0.883	2.44734
76	0.625	255	255	255	11.879	28.632	2.17	159.439	100	20655	124	321	158.629	0.476	4.55882
106	1.058	255	255	255	53.729	38.511	2.212	269.669	100	34935	613	426	96.843	1.189	1.86039
22	0.448	255	255	255	5.084	14.054	2.24	114.167	100	14790	49	152	138.18	0.38	5.89474
35	0.517	255	255	255	67.996	18.156	2.245	131.882	100	17085	763	204	149.421	1.038	2.16281
239	1.158	255	255	255	62.382	75.623	2.25	295.258	100	38250	707	873	51.34	1.295	1.73745
156	0.756	255	255	255	73.477	45.697	2.252	192.902	100	24990	831	507	110.556	0.762	2.95538
61	1.081	255	255	255	66.647	24.098	2.259	275.574	100	35700	746	275	13.496	0.971	2.32647
80	0.618	255	255	255	37.632	30.971	2.291	157.471	100	20400	418	344	147.529	0.584	3.92295
58	0.633	255	255	255	18.504	22.682	2.299	161.408	100	20910	200	249	136.548	0.559	4.1127
160	0.378	255	255	255	76.318	45.553	2.311	96.451	100	12495	856	516	171.254	0.326	7.08896
63	0.602	255	255	255	33.436	24.308	2.32	153.534	100	19890	367	271	155.376	0.432	5.37037
199	0.502	255	255	255	56.065	58.646	2.339	127.945	100	16575	627	659	145.713	0.487	4.80287
224	0.872	255	255	255	61.718	72.332	2.39	222.428	100	28815	699	837	72.897	0.685	3.48905
253	0.818	255	255	255	44.505	79.395	2.39	208.649	100	27030	493	897	162.897	0.661	3.61573
122	0.571	255	255	255	61.28	41.195	2.398	145.661	100	18870	690	482	61.557	0.493	4.8641
89	0.602	255	255	255	13.828	34.356	2.451	153.534	100	19890	143	395	14.534	0.416	5.89183
209	0.772	255	255	255	6.17	61.759	2.451	196.839	100	25500	57	699	165.466	0.857	2.85998
111	1.034	255	255	255	18.76	39.588	2.476	263.764	100	34170	206	437	117.474	1.036	2.38996
283	1.058	255	255	255	3.185	85.963	2.487	269.669	100	34935	23	986	32.005	0.835	2.97844
284	0.633	255	255	255	34.405	86.688	2.516	161.408	100	20910	389	971	114.775	0.904	2.78319
77	0.872	255	255	255	80.645	28.937	2.53	222.428	100	28815	903	324	159.677	0.599	4.22371
62	0.957	255	255	255	15.939	24.825	2.534	244.08	100	31620	173	271	123.69	0.741	3.4197
263	0.602	255	255	255	54.065	81.506	2.534	153.534	100	19890	604	920	146.31	0.444	5.70721
229	0.571	255	255	255	47.762	73.222	2.554	145.661	100	18870	533	825	139.185	0.536	4.76493
28	0.78	255	255	255	1.974	16.444	2.562	198.807	100	25755	8	181	157.834	0.596	4.29866
113	1.196	255	255	255	27.066	39.552	2.633	305.1	100	39525	295	445	154.29	0.668	3.94162
126	0.695	255	255	255	21.896	41.838	2.633	177.155	100	22950	236	482	25.71	0.46	5.72391
259	2.092	252.177	0	255	60.733	80.473	2.649	527.528	98.893	68340	676	912	174.289	1.437	1.84342
163	0.903	255	255	255	62.819	46.944	2.672	230.301	100	29835	701	529	152.592	0.668	4
5	0.934	255	255	255	88.552	2.674	2.736	238.175	100	30855	1006	14	95.528	0.615	4.44878
109	0.857	255	255	255	44.941	38.87	2.792	218.491	100	28305	495	450	24.146	0.964	2.89627
108	0.834	255	255	255	38.188	38.823	2.796	212.586	100	27540	426	432	136.273	0.808	3.4604
121	1.212	255	255	255	35.417	41.215	2.802	309.037	100	40035	391	458	138.814	0.867	3.23183
125	0.502	255	255	255	43.326	41.767	2.802	127.945	100	16575	482	464	138.814	0.476	5.88655
26	1.559	255	255	255	16.189	15.649	2.846	397.615	100	51510	167	178	171.119	1.163	2.44712
147	1.227	255	255	255	49.348	44.988	2.851	312.974	100	40545	551	523	56.31	1.102	2.58711
149	0.818	255	255	255	69.675	44.848	2.869	208.649	100	27030	783	496	117.35	0.975	2.94256
151	2.733	220.424	0	255	36.604	44.804	2.89	602.327	86.441	78030	401	504	160.463	2	1.445
236	0.988	255	255	255	46.531	75.824	2.911	251.954	100	32640	535	880	84.806	1.255	2.31952
227	1.775	255	255	255	44.712	73.133	2.973	452.729	100	58650	498	818	108.97	1.445	2.05744
132	1.096	255	255	255	73.017	42.631	3.136	279.511	100	36210	833	505	78.69	1.519	2.06452
217	0.818	255	255	255	63.737	64.676	3.149	208.649	100	27030	708	731	157.011	0.888	3.54617
164	0.872	255	255	255	59.044	47.1	3.226	222.428	100	28815	660	529	150.642	1.001	3.22278
32	0.834	255	255	255	28.456	18.125	3.233	212.586	100	27540	310	192	132.797	0.516	6.2655
112	1.606	255	255	255	53.797	39.981	3.24	409.425	100	53040	596	441	130.601	1.864	1.7382
84	1.768	255	255	255	34.02	33.895	3.241	450.761	100	58395	374	400	57.171	1.903	1.7031
235	0.957	255	255	255	67.616	74.946	3.301	244.08	100	31620	753	844	154.799	0.643	5.13375
216	1.459	255	255	255	40.107	64.91	3.307	372.025	100	48195	439	742	16.991	1.139	2.90342
88	1.938	255	255	255	19.682	34.415	3.38	494.066	100	64005	208	385	171.027	1.44	2.34722
102	1.258	255	255	255	36.29	38.497	3.422	320.847	100	41565	400	421	131.878	0.87	3.93333
46	0.942	255	255	255	29.304	20.488	3.437	240.143	100	31110	313	232	175.601	0.609	5.64368
218	1.173	255	255	255	65.028	67.592	3.437	299.195	100	38760	739	789	85.601	0.679	5.06186
268	1.366	255	255	255	50.42	83.209	3.517	348.405	100	45135	567	966	77.005	0.838	4.1969
135	0.98	255	255	255	31.738	43.264	3.542	249.985	100	32385	353	474	113.385	0.492	7.19919
178	1.011	255	255	255	33.892	50.32	3.555	257.859	100	33405	372	556	129.987	0.495	7.18182
280	2.115	255	255	255	0.514	85.916	3.694	539.339	100	69870	0	1004	64.654	1.604	2.30299
20	0.973	255	255	255	18.406	12.624	3.733	248.017	100	32130	188	133	153.435	0.574	6.50348
142	1.382	255	255	255	31.029	44.654	4.098	352.342	100	45645	343	484	120.964	1.161	3.52972
103	2.239	255	255	255	23.12	37.981	4.118	570.833	100	73950	244	422	146.31	1.09	3.77798
36	1.853	255	255	255	8.192	19.613	4.147	472.413	100	61200	71	241	36.384	1.678	2.47139
200	2.03	255	255	255	58.567	60.173	4.166	517.686	100	67065	656	705	62.354	2.628	1.58524
17	2.385	255	255	255	9.488	13.129	4.341	608.232	100	78795	83	134	144.058	1.314	3.30365
16	1.968	254	0	255	13.391	12.899	4.422	499.971	99.608	64770	135	125	130.972	1.009	4.38256
115	1.783	255	255	255	46.661	41.522	4.435	454.698	100	58905	509	453	146.31	1.706	2.59965
44	1.883	255	255	255	20.214	21.504	4.454	480.287	100	62220	224	219	104.859	1.346	3.30906
175	2.323	255	255	255	1.042	50.32	4.474	592.485	100	76755	0	550	109.502	1.41	3.17305
92	2.694	255	255	255	24.651	35.377	4.495	686.968	100	88995	253	406	175.515	2.021	2.22415
265	1.791	255	255	255	48.007	82.077	4.689	456.666	100	59160	520	922	167.005	1.447	3.2405
24	3.435	255	255	255	13.311	16.001	4.871	875.933	100	113475	123	195	7.253	2.902	1.6785
197	2.208	255	255	255	54.254	58.826	5.032	562.959	100	72930	601	650	114.775	1.71	2.94269
134	2.964	245.703	0	255	25.182	43.78	5.244	728.304	96.354	94350	296	531	81.327	2.949	1.77823
228	3.829	255	255	255	69.534	73.885	5.485	976.321	100	126480	766	822	144.782	1.51	3.63245
154	6.345	229.562	0	255	41.072	46.147	5.58	1456.61	90.024	188700	447	505	146.56	2.832	1.97034
156	0.201	255	255	255	66.992	30.751	0.589	51.178	100	6630	761	347	116.565	0.439	1.34169
48	0.232	255	255	255	73.79	11.322	0.634	59.052	100	7650	837	131	33.69	0.527	1.20304
102	0.224	255	255	255	65.108	21.518	0.634	57.083	100	7395	739	242	123.69	0.527	1.20304
108	0.208	255	255	255	85.508	22.428	0.634	53.146	100	6885	971	258	56.31	0.527	1.20304
224	0.232	255	255	255	12.728	41.569	0.634	59.052	100	7650	143	470	123.69	0.527	1.20304
301	0.201	255	255	255	49.025	60.095	0.634	51.178	100	6630	555	686	33.69	0.471	1.34607
110	0.232	255	255	255	81.758	22.463	0.64	59.052	100	7650	927	256	15.945	0.527	1.21442
289	0.208	255	255	255	73.211	58.47	0.64	53.146	100	6885	832	662	105.945	0.439	1.45786
297	0.208	255	255	255	39.209	59.423	0.64	53.146	100	6885	443	675	164.055	0.439	1.45786
347	0.201	255	255	255	25.222	79.931	0.64	51.178	100	6630	287	906	105.945	0.5	1.28
235	0.262	255	255	255	67.698	44.756	0.669	66.925	100	8670	767	508	156.801	0.589	1.13582
239	0.216	255	255	255	37.535	45.633	0.669	55.115	100	7140	425	516	113.199	0.439	1.52392
255	0.216	255	255	255	35.282	49.995	0.669	55.115	100	7140	401	573	66.801	0.439	1.52392
50	0.208	245.556	0	255	67.998	12.139	0.686	51.178	96.296	6630	772	135	129.806	0.487	1.40862
327	0.262	255	255	255	59.033	67.812	0.686	66.925	100	8670	669	769	129.806	0.527	1.30171
340	0.208	255	255	255	59.69	72.117	0.686	53.146	100	6885	676	823	39.806	0.439	1.56264
26	0.278	255	255	255	26.038	6.404	0.708	70.862	100	9180	293	75	29.745	0.527	1.34345
66	0.293	255	255	255	77.288	15.831	0.708	74.799	100	9690	877	177	119.745	0.615	1.15122
85	0.247	255	255	255	53.646	18.412	0.708	62.988	100	8160	607	208	150.255	0.439	1.61276
122	0.216	255	255	255	82.339	24.481	0.708	55.115	100	7140	934	281	29.745	0.471	1.50318
350	0.224	255	255	255	74.621	82.074	0.708	57.083	100	7395	846	932	150.255	0.497	1.42455
5	0.286	255	255	255	54.941	1.735	0.756	72.83	100	9435	623	16	125.538	0.559	1.35242
19	0.363	255	255	255	46.207	4.585	0.756	92.514	100	11985	523	49	125.538	0.703	1.07539
34	0.332	255	255	255	45.248	8.548	0.756	84.641	100	10965	512	94	125.538	0.683	1.10688
132	0.262	255	255	255	81.709	26.216	0.756	66.925	100	8670	928	302	54.462	0.527	1.43454
225	0.324	255	255	255	38.685	41.783	0.756	82.672	100	10710	438	472	125.538	0.615	1.22927
73	0.247	255	255	255	70.658	17.006	0.786	62.988	100	8160	800	195	26.565	0.58	1.35517
189	0.278	255	255	255	66.534	35.934	0.786	70.862	100	9180	755	405	116.565	0.439	1.79043
190	0.255	255	255	255	56.649	35.912	0.786	64.957	100	8415	641	411	26.565	0.471	1.66879
257	0.247	255	255	255	41.387	51.296	0.786	62.988	100	8160	467	582	153.435	0.439	1.79043
276	0.201	255	255	255	67.709	56.385	0.786	51.178	100	6630	769	646	63.435	0.384	2.04688
294	0.255	255	255	255	60.459	59.088	0.786	64.957	100	8415	686	677	63.435	0.611	1.28642
279	0.201	255	255	255	30.845	57.115	0.81	51.178	100	6630	347	652	40.601	0.482	1.6805
59	0.386	255	255	255	66.89	14.5	0.829	98.419	100	12750	757	167	32.005	0.683	1.21376
123	0.262	255	255	255	8.003	24.792	0.829	66.925	100	8670	87	285	32.005	0.511	1.62231
234	0.309	255	255	255	46.998	44.685	0.829	78.736	100	10200	533	513	57.995	0.527	1.57306
270	0.201	255	255	255	68.662	54.777	0.829	51.178	100	6630	777	626	32.005	0.404	2.05198
333	0.224	255	255	255	59.885	70.228	0.829	57.083	100	7395	678	796	122.005	0.511	1.62231
321	0.286	255	255	255	44.956	64.53	0.834	72.83	100	9435	508	737	18.435	0.583	1.43053
22	0.286	255	255	255	66.489	5.489	0.865	72.83	100	9435	756	68	66.038	0.527	1.64137
70	0.208	255	255	255	69.225	16.135	0.865	53.146	100	6885	784	186	23.962	0.39	2.21795
143	0.363	255	255	255	73.23	28.232	0.865	92.514	100	11985	829	323	23.962	0.611	1.41571
299	0.316	255	255	255	59.025	59.841	0.865	80.704	100	10455	667	683	23.962	0.527	1.64137
44	0.448	255	255	255	73.895	9.602	0.879	114.167	100	14790	837	106	126.87	0.703	1.25036
290	0.278	255	255	255	74.338	58.494	0.879	70.862	100	9180	842	668	36.87	0.527	1.66793
18	0.486	255	255	255	45.361	4.564	0.896	124.008	100	16065	515	47	101.31	0.791	1.13274
51	0.494	255	255	255	69.639	12.455	0.905	125.977	100	16320	788	144	29.055	0.791	1.14412
129	0.247	255	255	255	39.023	25.792	0.905	62.988	100	8160	440	296	29.055	0.435	2.08046
105	0.332	255	255	255	53.203	22.423	0.917	84.641	100	10965	604	250	106.699	0.439	2.08884
244	0.201	255	255	255	35.87	46.829	0.917	51.178	100	6630	406	537	73.301	0.524	1.75
328	0.232	255	255	255	47.868	68.181	0.917	59.052	100	7650	540	777	16.699	0.533	1.72045
332	0.432	255	255	255	85.611	70.235	0.917	110.23	100	14280	969	799	163.301	0.703	1.30441
62	0.255	255	255	255	48.752	14.663	0.934	64.957	100	8415	551	163	131.186	0.373	2.50402
263	0.316	255	255	255	60.45	52.588	0.934	80.704	100	10455	684	602	41.186	0.536	1.74254
274	0.27	255	255	255	26.63	55.947	0.934	68.894	100	8925	299	634	138.814	0.497	1.87928
117	0.239	255	255	255	9.139	24.35	0.946	61.02	100	7905	102	282	68.199	0.351	2.69516
273	0.239	255	255	255	24.452	55.71	0.946	61.02	100	7905	273	636	21.801	0.351	2.69516
281	0.247	255	255	255	35.66	57.125	0.946	62.988	100	8160	401	648	158.199	0.351	2.69516
307	0.208	255	255	255	41.207	61.077	0.946	53.146	100	6885	464	693	158.199	0.338	2.79882
15	0.386	255	255	255	59.349	4.071	0.95	98.419	100	12750	671	43	146.31	0.615	1.54472
64	0.262	255	255	255	66.32	15.577	0.95	66.925	100	8670	752	173	123.69	0.435	2.18391
68	0.448	255	255	255	73.877	16.148	0.95	114.167	100	14790	838	179	123.69	0.703	1.35135
77	0.556	255	255	255	51.524	17.68	0.95	141.724	100	18360	583	197	123.69	0.791	1.20101
106	0.239	255	255	255	89.175	22.272	0.95	61.02	100	7905	1010	256	33.69	0.393	2.4173
154	0.255	255	255	255	88.582	30.725	0.95	64.957	100	8415	1003	352	33.69	0.422	2.25118
203	0.309	255	255	255	43.769	38.089	0.95	78.736	100	10200	493	436	33.69	0.489	1.94274
218	0.355	255	255	255	39.057	40.688	0.95	90.546	100	11730	440	460	146.31	0.571	1.66375
349	0.371	255	255	255	72.778	81.635	0.95	94.483	100	12240	823	927	146.31	0.611	1.55483
17	0.278	255	255	255	61.601	4.081	0.982	70.862	100	9180	696	44	153.435	0.439	2.2369
63	0.201	255	255	255	75.471	15.22	0.982	51.178	100	6630	857	169	116.565	0.432	2.27315
163	0.216	255	255	255	82.201	31.51	0.982	55.115	100	7140	931	356	153.435	0.389	2.52442
252	0.293	255	255	255	74.902	49.488	0.982	74.799	100	9690	850	568	63.435	0.542	1.81181
259	0.224	255	255	255	6.751	51.696	0.982	57.083	100	7395	75	595	79.695	0.439	2.2369
313	0.224	255	255	255	41.513	63.242	0.982	57.083	100	7395	472	714	100.305	0.264	3.7197
318	0.286	255	255	255	48.974	64.005	0.982	72.83	100	9435	553	726	153.435	0.471	2.08493
201	0.432	255	255	255	69.849	37.442	0.994	110.23	100	14280	792	431	45	0.707	1.40594
136	0.401	255	255	255	57.914	26.755	1.002	102.356	100	13260	658	310	74.745	0.527	1.90133
187	0.316	255	255	255	45.675	35.77	1.002	80.704	100	10455	515	409	15.255	0.439	2.28246
216	0.286	255	255	255	84.215	39.925	1.002	72.83	100	9435	953	456	15.255	0.41	2.4439
280	0.247	255	255	255	32.187	56.979	1.002	62.988	100	8160	361	647	164.745	0.264	3.79545
339	0.502	255	255	255	61.063	71.816	1.002	127.945	100	16575	689	817	164.745	0.786	1.27481
144	0.293	255	255	255	84.368	28.309	1.025	74.799	100	9690	955	325	30.964	0.445	2.30337
10	0.27	255	255	255	66.52	3.245	1.028	68.894	100	8925	755	32	109.983	0.46	2.23478
11	0.293	255	255	255	61.187	3.207	1.028	74.799	100	9690	691	35	160.017	0.419	2.45346
271	0.216	255	255	255	66.644	54.968	1.028	55.115	100	7140	753	627	19.983	0.381	2.69816
326	0.278	255	255	255	47.097	67.825	1.028	70.862	100	9180	533	767	109.983	0.527	1.95066
138	0.34	255	255	255	77.915	27.051	1.062	86.609	100	11220	882	311	24.444	0.527	2.01518
300	0.332	255	255	255	61.022	60.007	1.062	84.641	100	10965	689	686	24.444	0.49	2.16735
344	0.27	255	255	255	67.946	74.312	1.062	68.894	100	8925	768	843	155.556	0.393	2.70229
25	0.201	255	255	255	71.362	6.589	1.069	51.178	100	6630	811	69	99.462	0.264	4.04924
316	0.216	255	255	255	42.514	63.553	1.069	55.115	100	7140	478	724	9.462	0.264	4.04924
242	0.201	255	255	255	73.433	45.94	1.072	51.178	100	6630	831	527	34.992	0.354	3.02825
246	0.371	255	255	255	32.863	47.056	1.072	94.483	100	12240	369	539	34.992	0.487	2.20123
111	0.309	255	255	255	81.164	23.133	1.087	78.736	100	10200	922	257	104.036	0.351	3.09687
165	0.262	255	255	255	49.488	32.466	1.087	66.925	100	8670	562	375	75.964	0.351	3.09687
247	0.34	255	255	255	41.23	47.058	1.087	86.609	100	11220	463	537	14.036	0.439	2.47608
275	0.332	255	255	255	40.96	56.108	1.087	84.641	100	10965	460	637	165.964	0.439	2.47608
314	0.286	255	255	255	68.999	62.994	1.087	72.83	100	9435	779	716	165.964	0.351	3.09687
6	0.309	255	255	255	57.113	2.203	1.101	78.736	100	10200	645	22	151.39	0.472	2.33263
149	0.232	255	255	255	73.801	29.257	1.101	59.052	100	7650	835	336	28.61	0.354	3.11017
256	0.255	255	255	255	21.79	50.395	1.101	64.957	100	8415	243	577	28.61	0.392	2.80867
320	0.324	255	255	255	58.085	64.474	1.101	82.672	100	10710	655	736	28.61	0.494	2.22874
155	0.208	255	255	255	57.123	30.645	1.111	53.146	100	6885	645	351	18.435	0.351	3.16524
222	0.232	255	255	255	36.912	41.349	1.111	59.052	100	7650	415	472	18.435	0.381	2.91601
89	0.316	255	255	255	69.232	19.656	1.118	80.704	100	10455	783	219	135	0.492	2.27236
178	0.255	255	255	255	81.17	34.051	1.125	64.957	100	8415	920	391	38.66	0.553	2.03436
232	0.27	255	255	255	39.37	44.134	1.125	68.894	100	8925	444	507	38.66	0.521	2.15931
23	0.224	255	255	255	30.325	5.746	1.142	57.083	100	7395	339	68	22.62	0.314	3.63694
170	0.239	255	255	255	44.248	32.71	1.142	61.02	100	7905	498	375	22.62	0.359	3.18106
231	0.355	255	255	255	22.79	44.059	1.142	90.546	100	11730	253	503	22.62	0.5	2.284
237	0.355	255	255	255	84.914	45.11	1.146	90.546	100	11730	961	510	147.529	0.511	2.24266
269	0.309	255	255	255	32.657	54.997	1.146	78.736	100	10200	369	631	57.529	0.536	2.13806
3	0.409	255	255	255	57.522	1.029	1.172	104.325	100	13515	649	13	12.995	0.527	2.22391
57	0.208	255	255	255	13.747	14.205	1.172	53.146	100	6885	155	168	77.005	0.298	3.93289
196	0.355	255	255	255	74.275	37.248	1.172	90.546	100	11730	843	418	102.995	0.583	2.01029
248	0.208	255	255	255	52.193	47.283	1.179	53.146	100	6885	588	535	153.435	0.311	3.791
341	0.278	255	255	255	82.897	73.843	1.179	70.862	100	9180	943	834	116.565	0.864	1.36458
160	0.247	255	255	255	84.548	31.388	1.182	62.988	100	8160	957	362	41.987	0.368	3.21196
220	0.224	255	255	255	33.788	41.029	1.182	57.083	100	7395	380	472	48.013	0.357	3.31092
236	0.216	255	255	255	30.609	45.125	1.182	55.115	100	7140	343	518	41.987	0.326	3.62577
32	0.347	255	255	255	48.653	7.379	1.195	88.577	100	11475	550	90	53.973	0.463	2.58099
69	0.201	255	255	255	43.781	16.247	1.195	51.178	100	6630	492	189	36.027	0.341	3.5044
140	0.27	255	255	255	85.581	27.724	1.195	68.894	100	8925	969	319	36.027	0.405	2.95062
166	0.648	255	255	255	56.6	32.244	1.195	165.345	100	21420	638	369	17.103	0.703	1.69986
180	0.355	255	255	255	4.385	34.517	1.195	90.546	100	11730	46	398	53.973	0.487	2.4538
199	0.347	255	255	255	3.82	37.616	1.195	88.577	100	11475	43	435	72.897	0.551	2.16878
204	0.587	255	255	255	48.062	38.385	1.195	149.598	100	19380	542	431	143.973	0.905	1.32044
238	0.355	255	255	255	77.333	45.501	1.195	90.546	100	11730	874	523	36.027	0.705	1.69504
261	0.293	255	255	255	37.421	52.62	1.195	74.799	100	9690	424	605	72.897	0.389	3.07198
20	0.371	255	255	255	63.857	4.832	1.221	94.483	100	12240	720	58	30.256	0.629	1.94118
61	0.463	255	255	255	46.747	14.684	1.221	118.103	100	15300	529	162	120.256	0.661	1.8472
130	0.309	255	255	255	57.389	26.033	1.224	78.736	100	10200	651	303	68.962	0.384	3.1875
175	0.587	255	255	255	62.027	33.757	1.224	149.598	100	19380	700	381	158.962	0.932	1.3133
282	0.417	255	255	255	63.732	57.235	1.224	106.293	100	13770	719	654	21.038	0.572	2.13986
254	0.332	255	255	255	24.34	49.929	1.243	84.641	100	10965	269	569	8.13	0.439	2.83144
315	0.27	255	255	255	58.314	63.262	1.243	68.894	100	8925	656	719	171.87	0.433	2.87067
84	0.71	255	255	255	52.356	18.678	1.249	181.092	100	23460	591	216	39.289	0.937	1.33298
139	0.548	255	255	255	6.284	27.538	1.249	139.756	100	18105	66	319	50.711	0.904	1.38164
217	0.425	255	255	255	86.904	40.213	1.249	108.261	100	14025	984	452	129.289	0.715	1.74685
245	0.556	255	255	255	37.051	46.997	1.249	141.724	100	18360	417	530	140.711	0.746	1.67426
311	0.324	255	255	255	53.232	62.357	1.249	82.672	100	10710	600	705	140.711	0.422	2.95972
58	0.517	255	255	255	74.922	14.061	1.258	131.882	100	17085	847	157	155.225	0.731	1.72093
112	0.324	255	255	255	63.951	23.513	1.258	82.672	100	10710	725	274	65.225	0.41	3.06829
219	0.332	255	255	255	45.565	40.58	1.258	84.641	100	10965	511	460	167.905	0.439	2.8656
240	0.27	255	255	255	42.505	45.683	1.258	68.894	100	8925	477	517	155.225	0.361	3.48476
121	0.548	255	255	255	71.526	24.686	1.267	139.756	100	18105	808	285	33.69	0.633	2.00158
27	0.309	255	255	255	77.678	6.75	1.279	78.736	100	10200	877	75	164.055	0.439	2.91344
131	0.216	255	255	255	89.192	25.994	1.279	55.115	100	7140	1008	298	15.945	0.306	4.17974
337	0.502	255	255	255	62.737	71.214	1.279	127.945	100	16575	707	812	15.945	0.703	1.81935
353	0.278	255	255	255	75.629	82.697	1.279	70.862	100	9180	853	939	164.055	0.381	3.35696
182	0.371	255	255	255	67.04	35.145	1.297	94.483	100	12240	756	403	28.301	0.518	2.50386
283	0.355	255	255	255	28.136	58.01	1.297	90.546	100	11730	315	657	151.699	0.511	2.53816
291	0.44	255	255	255	76.947	58.741	1.297	112.198	100	14535	869	671	28.301	0.5	2.594
343	0.332	255	255	255	76.806	74.168	1.297	84.641	100	10965	871	852	61.699	0.487	2.66324
152	0.471	255	255	255	62.151	30.148	1.306	120.072	100	15555	700	346	19.654	0.549	2.37887
176	0.432	250.446	0	255	58.421	33.733	1.306	108.261	98.214	14025	658	386	19.654	0.615	2.12358
285	0.332	255	255	255	69.546	58.072	1.306	84.641	100	10965	785	664	19.654	0.411	3.17762
200	0.216	255	255	255	7.857	37.563	1.318	55.115	100	7140	85	422	126.87	0.316	4.17089
78	0.34	255	255	255	6.414	17.981	1.338	86.609	100	11220	69	197	113.199	0.676	1.97929
168	0.371	255	255	255	51.65	32.53	1.338	94.483	100	12240	580	373	23.199	0.479	2.79332
215	0.401	255	255	255	44.438	39.623	1.338	102.356	100	13260	499	454	23.199	0.491	2.72505
65	0.502	255	255	255	73.082	16.172	1.341	127.945	100	16575	828	190	58.392	0.589	2.27674
212	0.448	255	255	255	40.866	39.452	1.341	114.167	100	14790	458	453	31.608	0.542	2.47417
287	0.479	255	255	255	48.963	58.273	1.344	122.04	100	15810	550	665	11.31	0.522	2.57471
1	0.44	255	255	255	44.326	0.517	1.367	112.198	100	14535	499	11	45	0.641	2.13261
226	0.216	255	255	255	11.353	42.778	1.367	55.115	100	7140	124	494	45	0.435	3.14253
142	0.239	255	255	255	2.612	28.193	1.372	61.02	100	7905	25	327	50.194	0.329	4.17021
329	0.347	255	255	255	49.497	68.437	1.375	88.577	100	11475	560	772	116.565	0.393	3.49873
258	0.502	255	255	255	26.595	51.501	1.389	127.945	100	16575	295	587	18.435	0.703	1.97582
2	0.919	255	255	255	43.111	1.155	1.417	234.238	100	30345	488	5	119.745	0.96	1.47604
135	0.316	255	255	255	2.118	26.605	1.417	80.704	100	10455	19	305	29.745	0.559	2.53488
228	0.239	255	255	255	76.858	43.673	1.417	61.02	100	7905	868	501	29.745	0.314	4.51274
24	0.27	255	255	255	17.073	6.543	1.43	68.894	100	8925	193	68	100.62	0.472	3.02966
147	0.602	255	255	255	8.005	29.379	1.43	153.534	100	19890	84	331	132.51	1.056	1.35417
188	0.316	255	255	255	59.111	35.742	1.43	80.704	100	10455	665	406	169.38	0.349	4.09742
295	0.479	255	255	255	25.687	59.354	1.43	122.04	100	15810	285	674	169.38	0.734	1.94823
230	0.579	255	255	255	40.459	44.199	1.441	147.629	100	19125	456	512	52.431	0.879	1.63936
243	0.332	255	255	255	14.974	46.278	1.441	84.641	100	10965	163	532	37.569	0.432	3.33565
207	0.726	192.606	0	255	70.545	38.442	1.454	139.756	75.532	18105	795	441	25.017	0.697	2.08608
262	0.378	255	255	255	35.139	52.96	1.454	96.451	100	12495	396	610	64.983	0.41	3.54634
210	0.278	255	255	255	52.498	39.075	1.462	70.862	100	9180	591	449	32.735	0.331	4.41692
137	0.54	255	255	255	64.615	27.035	1.473	137.787	100	17850	727	311	17.354	0.556	2.64928
184	0.324	255	255	255	61.882	35.727	1.473	82.672	100	10710	702	416	72.646	0.446	3.30269
221	0.216	255	255	255	7.004	41.589	1.491	55.115	100	7140	73	480	45	0.249	5.98795
97	0.262	255	255	255	68.22	20.758	1.494	66.925	100	8670	768	231	151.928	0.354	4.22034
74	0.826	255	255	255	68.295	17.204	1.501	210.618	100	27285	770	192	159.444	0.767	1.95698
265	0.517	255	255	255	4.533	53.71	1.501	131.882	100	17085	44	614	20.556	0.528	2.8428
33	0.34	255	255	255	16.018	8.646	1.512	86.609	100	11220	178	106	54.462	0.366	4.13115
83	0.525	255	255	255	58.323	18.285	1.512	133.85	100	17340	657	214	35.538	0.825	1.83273
223	0.262	255	255	255	48.227	41.743	1.512	66.925	100	8670	544	482	54.462	0.316	4.78481
88	0.486	255	255	255	6.656	19.896	1.517	124.008	100	16065	69	229	10.008	0.958	1.58351
52	0.502	255	255	255	31.919	12.514	1.534	127.945	100	16575	355	146	23.629	0.487	3.1499
119	0.726	255	255	255	80.264	24.84	1.534	185.029	100	23970	913	291	76.759	0.915	1.6765
268	0.347	255	255	255	25.593	54.155	1.534	88.577	100	11475	281	618	13.241	0.351	4.37037
331	0.409	255	255	255	61.868	68.955	1.534	104.325	100	13515	696	781	156.371	0.5	3.068
99	0.563	255	255	255	81.995	21.244	1.537	143.692	100	18615	928	234	120.964	0.585	2.62735
192	0.563	255	255	255	52.479	36.633	1.537	143.692	100	18615	592	423	59.036	0.738	2.08266
205	0.247	255	255	255	14.03	38.422	1.537	62.988	100	8160	153	442	30.964	0.333	4.61562
107	0.316	255	255	255	70.43	22.688	1.554	80.704	100	10455	795	251	132.709	0.373	4.16622
80	0.594	255	255	255	63.541	17.82	1.557	151.566	100	19635	716	205	16.39	0.615	2.53171
109	0.255	255	255	255	14.288	22.954	1.557	64.957	100	8415	160	253	106.39	0.276	5.6413
4	0.232	255	255	255	48.378	1.789	1.564	59.052	100	7650	544	15	141.843	0.341	4.58651
211	0.486	255	255	255	45.672	39.586	1.572	124.008	100	16065	516	443	116.565	0.512	3.07031
9	0.687	255	255	255	63.833	3.331	1.584	175.187	100	22695	719	33	146.31	0.609	2.60099
71	0.309	255	255	255	35.952	17.238	1.584	78.736	100	10200	403	201	56.31	0.599	2.64441
302	0.587	255	255	255	64.083	60.334	1.584	149.598	100	19380	723	692	33.69	0.894	1.77181
323	0.409	255	255	255	49.056	65.255	1.584	104.325	100	13515	550	736	146.31	0.559	2.83363
29	0.293	255	255	255	19.276	6.832	1.591	74.799	100	9690	210	77	173.66	0.264	6.02652
81	0.417	255	255	255	35.017	18.244	1.613	106.293	100	13770	391	212	29.358	0.437	3.69108
198	0.293	255	255	255	77.697	37.183	1.615	74.799	100	9690	876	427	22.38	0.362	4.46133
30	0.401	255	255	255	65.963	7.193	1.62	102.356	100	13260	744	76	139.399	0.373	4.34316
95	0.34	255	255	255	11.432	20.835	1.62	86.609	100	11220	123	243	40.601	0.343	4.72303
98	0.98	250.984	0	255	76.398	21.169	1.62	246.049	98.425	31875	869	232	102.529	1.054	1.537
251	0.872	255	255	255	42.267	48.9	1.62	222.428	100	28815	472	559	12.529	1.221	1.32678
334	0.602	255	255	255	53.859	70.834	1.62	153.534	100	19890	606	799	130.601	0.808	2.00495
94	0.733	255	255	255	70.751	20.47	1.641	186.997	100	24225	803	243	74.476	0.703	2.33428
195	0.571	255	255	255	39.168	37.15	1.667	145.661	100	18870	437	426	18.435	0.589	2.83022
322	0.401	255	255	255	62.39	64.512	1.667	102.356	100	13260	702	738	18.435	0.424	3.9316
145	0.702	255	255	255	69.978	28.714	1.679	179.123	100	23205	787	325	173.991	0.66	2.54394
159	0.401	255	255	255	11.327	31.491	1.679	102.356	100	13260	122	365	42.879	0.424	3.95991
146	0.479	255	255	255	31.176	29.059	1.688	122.04	100	15810	348	337	38.66	0.682	2.47507
194	0.679	255	255	255	48.6	36.568	1.69	173.218	100	22440	545	422	27.897	0.75	2.25333
312	0.641	255	255	255	46.322	62.57	1.69	163.376	100	21165	517	712	8.973	0.775	2.18065
296	0.579	255	255	255	34.562	59.176	1.697	147.629	100	19125	382	671	158.749	0.615	2.75935
56	0.378	255	255	255	47.394	13.825	1.706	96.451	100	12495	537	167	78.111	0.346	4.93064
96	0.533	255	255	255	31.663	21.01	1.706	135.819	100	17595	355	247	55.491	0.477	3.57652
118	0.934	255	255	255	50.194	24.955	1.726	238.175	100	30855	569	273	104.744	0.966	1.78675
141	0.656	255	255	255	9.237	28.166	1.726	167.313	100	21675	105	331	75.256	0.691	2.49783
126	0.44	255	255	255	55.184	25.506	1.731	112.198	100	14535	617	286	156.038	0.528	3.27841
171	1.019	255	255	255	50.735	33.233	1.74	259.827	100	33660	572	370	135	1.177	1.47833
100	0.895	255	255	255	54.086	21.091	1.751	228.333	100	29580	606	237	162.474	0.703	2.49075
208	0.525	255	255	255	37.468	38.553	1.751	133.85	100	17340	416	435	162.474	0.522	3.35441
338	0.417	255	255	255	69.714	71.462	1.751	106.293	100	13770	784	811	162.474	0.379	4.62005
162	0.525	255	255	255	31	31.871	1.757	133.85	100	17340	345	357	143.13	0.439	4.00228
342	0.417	255	255	255	72.184	73.904	1.768	106.293	100	13770	814	837	153.435	0.471	3.75372
40	0.903	255	255	255	76.953	9.171	1.779	230.301	100	29835	871	97	110.225	0.966	1.84161
55	0.401	255	255	255	68.418	13.806	1.792	102.356	100	13260	777	167	78.69	0.348	5.14943
124	0.726	255	255	255	66.774	25.096	1.792	185.029	100	23970	749	287	11.31	0.615	2.91382
286	0.34	255	255	255	34.397	58.244	1.792	86.609	100	11220	381	661	168.69	0.345	5.1942
298	0.363	255	255	255	27.867	59.625	1.792	92.514	100	11985	308	678	168.69	0.508	3.52756
16	0.425	255	255	255	48.373	4.678	1.809	108.261	100	14025	546	62	60.945	0.393	4.60305
169	0.316	255	255	255	86.649	32.775	1.809	80.704	100	10455	978	377	29.055	0.488	3.70697
12	0.463	255	255	255	74.214	3.986	1.811	118.103	100	15300	842	35	104.036	0.431	4.20186
104	0.533	255	255	255	78.306	22.526	1.811	135.819	100	17595	887	247	112.834	0.472	3.83686
133	0.687	255	255	255	50.905	26.302	1.811	175.187	100	22695	570	298	165.964	0.568	3.18838
49	0.587	255	255	255	72.488	12.371	1.828	149.598	100	19380	816	135	144.782	0.487	3.75359
8	0.533	255	255	255	78.065	2.764	1.835	135.819	100	17595	879	29	163.301	0.696	2.63649
177	0.741	255	255	255	0.679	33.92	1.835	188.965	100	24480	0	389	16.699	1.133	1.61959
317	0.448	255	255	255	38.297	63.842	1.847	114.167	100	14790	424	725	177.274	0.615	3.00325
335	0.347	255	255	255	85.527	70.926	1.847	88.577	100	11475	965	812	25.346	0.375	4.92533
253	0.371	255	255	255	22.457	49.869	1.853	94.483	100	12240	245	567	174.56	0.264	7.01894
76	0.926	255	255	255	53.113	17.562	1.862	236.207	100	30600	594	195	160.71	0.778	2.39332
115	0.687	255	255	255	86.964	23.682	1.862	175.187	100	22695	981	272	19.29	0.791	2.35398
42	0.579	255	255	255	26.568	10.086	1.864	147.629	100	19125	298	122	81.87	1.318	1.41426
292	0.363	255	255	255	33.972	58.638	1.864	92.514	100	11985	376	666	171.87	0.264	7.06061
267	0.641	255	255	255	70.246	54.42	1.868	163.376	100	21165	791	612	138.814	0.65	2.87385
288	0.502	255	255	255	43.525	58.794	1.868	127.945	100	16575	487	676	41.186	0.497	3.75855
157	0.587	255	255	255	78.015	31.095	1.88	149.598	100	19380	879	361	37.405	0.648	2.90123
7	1.297	255	255	255	46.204	2.908	1.919	330.689	100	42840	516	29	164.055	1.264	1.5182
209	0.795	255	255	255	42.485	39.319	1.927	202.744	100	26265	475	449	24.228	0.877	2.19726
193	0.301	255	255	255	50.975	36.983	1.929	76.767	100	9945	574	430	59.931	0.442	4.36425
309	0.741	255	255	255	63.492	62.234	1.929	188.965	100	24480	712	708	149.931	1.179	1.63613
229	0.432	255	255	255	46.222	43.948	1.951	110.23	100	14280	516	507	35.838	0.419	4.65632
308	0.502	255	255	255	33.305	61.92	1.965	127.945	100	16575	374	696	116.565	1.001	1.96304
43	0.764	255	255	255	45.833	9.889	1.974	194.87	100	25245	514	105	122.276	0.945	2.08889
38	0.911	255	255	255	47.998	9.197	1.988	232.27	100	30090	539	114	45	0.884	2.24887
116	0.579	255	255	255	68.918	23.883	2.007	147.629	100	19125	773	267	156.801	0.504	3.98214
92	0.54	255	255	255	28.863	20.388	2.023	137.787	100	17850	322	224	124.38	0.455	4.44615
191	0.556	255	255	255	46.277	36.253	2.028	141.724	100	18360	515	414	17.65	0.63	3.21905
305	0.888	255	255	255	49.848	61.46	2.044	226.365	100	29325	564	689	115.463	1.056	1.93561
330	0.502	255	255	255	56.315	68.825	2.049	127.945	100	16575	635	793	59.036	0.47	4.35957
31	0.741	255	255	255	43.78	7.278	2.051	188.965	100	24480	488	81	170.134	0.615	3.33496
127	1.112	255	255	255	62.638	25.947	2.051	283.448	100	36720	705	302	43.264	0.946	2.16808
185	0.517	255	255	255	27.556	35.932	2.051	131.882	100	17085	305	417	43.264	0.397	5.16625
128	0.687	255	255	255	87.732	25.822	2.057	175.187	100	22695	985	301	19.983	1.01	2.03663
164	0.347	255	255	255	1.055	32.134	2.059	88.577	100	11475	3	373	39.806	0.34	6.05588
233	0.602	255	255	255	36.389	45.531	2.083	153.534	100	19890	408	526	62.354	0.882	2.36168
266	0.602	255	255	255	39.032	54.27	2.083	153.534	100	19890	438	608	117.646	0.49	4.25102
179	0.88	241.579	0	255	50.911	34.88	2.127	212.586	94.737	27540	571	386	141.71	1.015	2.09557
348	0.494	255	255	255	21.683	81.074	2.138	125.977	100	16320	236	923	9.462	0.589	3.62988
227	0.803	255	255	255	20.24	43.068	2.17	204.712	100	26520	221	497	31.759	0.765	2.8366
351	0.401	255	255	255	24.69	82.178	2.174	102.356	100	13260	270	933	165.964	0.327	6.64832
82	1.521	255	255	255	55.836	18.712	2.196	387.773	100	50235	623	205	143.13	1.442	1.52288
114	0.502	255	255	255	22.14	24.288	2.202	127.945	100	16575	246	287	61.39	0.432	5.09722
354	0.517	255	255	255	10.086	88.016	2.212	131.882	100	17085	114	1014	83.157	0.351	6.30199
150	0.926	255	255	255	4.806	30.354	2.267	236.207	100	30600	46	357	54.462	0.805	2.81615
158	0.502	255	255	255	2.182	31.651	2.279	127.945	100	16575	19	374	62.447	0.655	3.47939
46	1.312	255	255	255	46.778	11.368	2.281	334.626	100	43350	530	141	74.358	0.98	2.32755
134	0.895	255	255	255	56.402	26.982	2.291	228.333	100	29580	627	311	32.471	1.281	1.78845
241	0.756	255	255	255	19.256	46.339	2.306	192.902	100	24990	211	538	49.635	0.559	4.12522
325	0.78	255	255	255	58.169	68.5	2.306	198.807	100	25755	657	790	72.255	0.725	3.18069
91	0.625	255	255	255	8.189	20.763	2.311	159.439	100	20655	90	250	81.254	0.485	4.76495
324	0.957	255	255	255	66.263	66.032	2.32	244.08	100	31620	744	760	37.304	0.746	3.10992
272	0.486	255	255	255	45.59	55.533	2.326	124.008	100	16065	507	629	169.114	0.356	6.53371
79	1.968	255	255	255	65.996	18.372	2.334	501.939	100	65025	745	223	70.201	1.838	1.26986
161	0.695	255	255	255	6.2	32.248	2.357	177.155	100	22950	57	364	153.435	1.657	1.42245
75	1.22	255	255	255	76.538	17.585	2.364	311.005	100	40290	862	194	138.013	0.979	2.41471
249	0.865	255	255	255	13.355	47.943	2.364	220.46	100	28560	144	558	48.013	0.974	2.4271
90	1.142	255	255	255	55.692	19.866	2.366	291.322	100	37740	620	223	164.932	0.879	2.6917
206	0.316	255	255	255	20.121	39.238	2.374	80.704	100	10455	229	433	92.121	0.253	9.3834
103	0.795	255	255	255	77.495	22.678	2.398	202.744	100	26265	877	245	118.443	0.684	3.50585
28	0.509	255	255	255	74.576	6.991	2.4	129.914	100	16830	836	86	23.749	0.464	5.17241
151	0.749	255	255	255	1.566	29.939	2.413	190.934	100	24735	6	342	10.491	0.74	3.26081
264	0.803	255	255	255	60.242	53.854	2.413	204.712	100	26520	675	620	33.111	0.644	3.74689
306	1.343	255	255	255	61.417	62.089	2.447	342.5	100	44370	687	707	158.962	2.032	1.20423
250	0.772	255	255	255	68.21	48.468	2.487	196.839	100	25500	764	561	32.005	0.563	4.41741
310	1.281	255	255	255	56.403	62.44	2.497	326.753	100	42330	632	703	140.711	1.671	1.49431
47	0.741	255	255	255	20.372	11.782	2.513	188.965	100	24480	219	143	36.469	0.613	4.09951
293	0.641	255	255	255	37.07	58.838	2.516	163.376	100	21165	409	673	12.095	0.455	5.52967
67	1.389	255	255	255	50.505	16.509	2.517	354.31	100	45900	561	179	150.751	1.611	1.56238
336	0.826	255	255	255	89.245	71.245	2.517	210.618	100	27285	999	805	150.751	1.016	2.47736
113	2.192	255	255	255	60.795	23.992	2.554	559.022	100	72420	679	278	26.565	1.396	1.82951
173	0.602	255	255	255	35.848	34.371	2.558	153.534	100	19890	404	406	74.055	0.369	6.93225
101	0.525	255	255	255	51.161	21.649	2.562	133.85	100	17340	571	253	30.964	0.418	6.12919
319	0.803	255	255	255	47.986	65.277	2.562	204.712	100	26520	536	730	120.964	0.831	3.08303
60	0.695	255	255	255	28.116	15.256	2.584	177.155	100	22950	311	186	54.689	0.553	4.67269
39	1.127	255	255	255	75.646	9.846	2.585	287.385	100	37230	862	97	99.782	1.385	1.86643
278	1.003	255	255	255	38.279	57.032	2.602	255.891	100	33150	423	646	168.311	0.791	3.28951
303	0.687	255	255	255	47.337	60.532	2.612	175.187	100	22695	524	693	19.654	0.545	4.79266
45	0.741	255	255	255	24.611	10.288	2.672	188.965	100	24480	266	119	9.462	0.515	5.18835
277	0.548	255	255	255	28.51	56.892	2.672	139.756	100	18105	307	650	9.462	0.7	3.81714
72	1.328	255	255	255	47.303	17.204	2.676	338.563	100	43860	526	186	156.801	1.389	1.92657
125	0.625	251.852	0	255	84.737	25.827	2.707	157.471	98.765	20400	953	307	54.246	0.873	3.1008
148	0.571	255	255	255	28.896	30.077	2.736	145.661	100	18870	328	328	95.528	0.439	6.23235
41	2.547	255	255	255	43.679	9.826	2.752	649.568	100	84150	496	128	73.301	1.651	1.66687
172	1.775	222.848	0	255	55.451	33.659	2.757	395.646	87.391	51255	617	392	30.651	1.358	2.03019
197	1.799	255	255	255	45.046	37.612	2.807	458.635	100	59415	498	425	159.864	1.845	1.52141
304	1.119	255	255	255	43.838	60.834	2.862	285.416	100	36975	484	686	162.121	0.816	3.50735
53	1.992	255	255	255	76.716	13.378	2.878	507.844	100	65790	866	143	121.264	1.618	1.77874
167	1.204	255	255	255	77.747	33.253	2.878	307.069	100	39780	877	394	58.736	1.167	2.46615
183	2.432	248.524	0	255	54.398	35.912	2.946	604.295	97.46	78285	603	403	162.646	1.494	1.97189
213	1.127	255	255	255	87.087	39.352	3.008	287.385	100	37230	975	449	6.71	0.527	5.70778
202	0.795	255	255	255	9.381	39.074	3.035	202.744	100	26265	99	429	112.109	0.518	5.85907
352	1.467	255	255	255	70.147	82.537	3.086	373.994	100	48450	783	942	4.899	0.791	3.90139
54	0.949	255	255	255	44.808	14.297	3.12	242.112	100	31365	508	146	99.728	0.693	4.50216
284	1.081	255	255	255	57.277	59.41	3.129	275.574	100	35700	640	685	51.843	1.458	2.14609
346	0.872	255	255	255	34.002	78.58	3.143	222.428	100	28815	371	900	26.565	0.749	4.19626
260	0.88	255	255	255	29.954	53.127	3.184	224.396	100	29070	330	623	62.021	0.804	3.9602
214	1.606	255	255	255	35.795	39.968	3.194	409.425	100	53040	391	467	31.504	1.316	2.42705
21	0.919	255	255	255	23.333	6.755	3.223	234.238	100	30345	257	93	72.553	1.021	3.15671
14	1.081	255	255	255	81.086	3.982	3.346	275.574	100	35700	908	50	13.671	0.957	3.49634
35	2.223	255	255	255	66.524	9.697	3.394	566.896	100	73440	751	93	111.251	1.273	2.66614
174	1.474	255	255	255	49.129	34.72	3.488	375.962	100	48705	543	409	49.086	1.395	2.50036
37	1.544	253.725	0	255	21.702	9.178	3.618	391.709	99.5	50745	233	118	29.055	2.215	1.63341
86	2.432	255	255	255	59.008	21.013	3.623	620.042	100	80325	665	216	112.834	1.925	1.88208
345	0.973	255	255	255	12.899	77.449	3.654	248.017	100	32130	127	871	152.819	0.489	7.47239
93	2.061	255	255	255	56.592	21.298	3.679	525.56	100	68085	626	253	40.156	1.456	2.52679
13	2.03	245.304	0	255	77.348	4.128	3.774	498.002	96.198	64515	865	57	24.775	1.064	3.54699
153	1.552	255	255	255	75.533	31.22	3.891	395.646	100	51255	838	365	25.408	0.975	3.99077
181	1.629	255	255	255	5.962	35.993	4.341	415.33	100	53805	45	406	144.058	2.83	1.53392
87	5.704	244.993	0	255	63.174	21.01	4.415	1397.56	96.076	181050	714	218	95.711	2.605	1.69482
120	1.992	255	255	255	60.888	25.104	4.55	507.844	100	65790	668	285	10.008	1.335	3.40824
186	1.721	255	255	255	67.008	37.077	4.66	438.951	100	56865	744	440	44.236	1.256	3.71019
36	1.243	255	255	255	17.535	10.59	5.351	316.911	100	41055	180	147	60.489	0.992	5.39415
189	0.216	255	255	255	65.103	67.764	0.589	55.115	100	7140	740	768	116.565	0.527	1.11765
109	0.232	255	255	255	55.779	44.708	0.634	59.052	100	7650	632	511	33.69	0.527	1.20304
165	0.208	255	255	255	65.186	62.707	0.634	53.146	100	6885	739	716	33.69	0.527	1.20304
185	0.224	255	255	255	18.046	66.492	0.634	57.083	100	7395	203	754	123.69	0.527	1.20304
191	0.224	255	255	255	18.458	67.847	0.634	57.083	100	7395	207	774	33.69	0.527	1.20304
256	0.232	255	255	255	77.152	86.553	0.634	59.052	100	7650	875	987	33.69	0.527	1.20304
257	0.232	255	255	255	58.327	86.617	0.634	59.052	100	7650	661	988	33.69	0.527	1.20304
29	0.247	255	255	255	40.404	18.788	0.686	62.988	100	8160	457	211	140.194	0.527	1.30171
107	0.201	255	255	255	29.831	44.169	0.708	51.178	100	6630	337	506	60.255	0.439	1.61276
143	0.232	255	255	255	63.932	56.268	0.708	59.052	100	7650	726	637	119.745	0.439	1.61276
214	0.216	255	255	255	28.604	72.098	0.708	55.115	100	7140	324	817	119.745	0.439	1.61276
249	0.309	255	255	255	55.577	84.634	0.708	78.736	100	10200	630	960	119.745	0.615	1.15122
251	0.309	255	255	255	82.361	84.81	0.708	78.736	100	10200	935	962	119.745	0.615	1.15122
206	0.224	255	255	255	68.468	69.813	0.751	57.083	100	7395	778	799	69.444	0.439	1.71071
241	0.324	255	255	255	64.616	82.416	0.751	82.672	100	10710	734	942	69.444	0.615	1.22114
246	0.247	255	255	255	80.899	83.502	0.756	62.988	100	8160	918	954	54.462	0.497	1.52113
260	0.34	255	255	255	82.42	88.654	0.756	86.609	100	11220	935	1012	35.538	0.695	1.08777
245	0.386	255	255	255	61.071	83.287	0.786	98.419	100	12750	693	944	116.565	0.703	1.11807
12	0.301	255	255	255	44.41	13.162	0.81	76.767	100	9945	502	153	40.601	0.559	1.44902
167	0.355	255	255	255	69.995	63.308	0.81	90.546	100	11730	793	718	139.399	0.615	1.31707
202	0.232	255	255	255	48.967	69.611	0.81	59.052	100	7650	554	796	40.601	0.435	1.86207
237	0.309	255	255	255	64.258	79.567	0.81	78.736	100	10200	728	909	40.601	0.615	1.31707
17	0.332	255	255	255	46.053	13.977	0.829	84.641	100	10965	522	155	122.005	0.609	1.36125
195	0.371	255	255	255	50.914	68.793	0.829	94.483	100	12240	577	779	122.005	0.615	1.34797
89	0.425	255	255	255	55.615	37.497	0.834	108.261	100	14025	631	431	71.565	0.703	1.18634
101	0.247	255	255	255	29.273	41.744	0.834	62.988	100	8160	329	477	18.435	0.615	1.3561
238	0.232	255	255	255	76.408	79.893	0.834	59.052	100	7650	868	913	71.565	0.439	1.89977
38	0.208	255	255	255	39.008	22.962	0.865	53.146	100	6885	442	266	66.038	0.351	2.46439
168	0.417	255	255	255	25.9	63.457	0.879	106.293	100	13770	292	718	126.87	0.683	1.28697
252	0.201	255	255	255	63.045	85.308	0.896	51.178	100	6630	717	976	78.69	0.264	3.39394
52	0.378	255	255	255	46.419	26.857	0.905	96.451	100	12495	524	303	150.945	0.611	1.48118
144	0.309	255	255	255	67.673	56.517	0.905	78.736	100	10200	768	639	119.055	0.511	1.77104
194	0.316	255	255	255	18.972	68.846	0.905	80.704	100	10455	213	788	60.945	0.527	1.71727
201	0.409	255	255	255	70.165	69.487	0.905	104.325	100	13515	794	789	150.945	0.615	1.47154
231	0.417	255	255	255	79.685	78.084	0.905	106.293	100	13770	904	893	60.945	0.695	1.30216
26	0.293	255	255	255	46.69	17.845	0.917	74.799	100	9690	529	208	73.301	0.439	2.08884
140	0.201	255	255	255	36.755	55.192	0.917	51.178	100	6630	417	634	73.301	0.414	2.21498
92	0.355	255	255	255	55.057	39.189	0.946	90.546	100	11730	622	444	158.199	0.527	1.79507
65	0.262	255	255	255	58.067	29.774	0.95	66.925	100	8670	658	344	56.31	0.49	1.93878
198	0.34	255	255	255	20.437	69.063	0.95	86.609	100	11220	229	791	56.31	0.559	1.69946
226	0.247	255	255	255	25.888	75.342	0.95	62.988	100	8160	292	853	123.69	0.412	2.30583
255	0.286	255	255	255	82.691	86.34	0.95	72.83	100	9435	938	978	123.69	0.487	1.95072
18	0.293	255	255	255	48.517	14.337	0.982	74.799	100	9690	550	168	63.435	0.471	2.08493
106	0.201	255	255	255	24.628	44.054	0.982	51.178	100	6630	279	496	100.305	0.351	2.79772
2	0.262	255	255	255	57.907	1.705	1.002	66.925	100	8670	656	15	127.875	0.497	2.0161
32	0.309	255	255	255	50.982	20.572	1.002	78.736	100	10200	579	228	105.255	0.439	2.28246
37	0.262	255	255	255	44.834	21.908	1.002	66.925	100	8670	505	246	142.125	0.542	1.84871
54	0.463	255	255	255	30.543	27.453	1.002	118.103	100	15300	343	309	142.125	0.683	1.46706
62	0.371	255	255	255	58.571	28.809	1.002	94.483	100	12240	662	324	142.125	0.583	1.7187
215	0.278	255	255	255	23.671	72.086	1.002	70.862	100	9180	264	822	15.255	0.439	2.28246
173	0.371	255	255	255	51.469	64.027	1.025	94.483	100	12240	583	734	59.036	0.559	1.83363
222	0.463	255	255	255	31.068	74.087	1.025	118.103	100	15300	349	840	149.036	0.682	1.50293
224	0.324	255	255	255	50.711	74.822	1.028	82.672	100	10710	576	847	109.983	0.621	1.65539
259	0.332	255	255	255	75.225	87.933	1.028	84.641	100	10965	854	1006	70.017	0.5	2.056
10	0.201	255	255	255	21.654	9.915	1.062	51.178	100	6630	244	108	114.444	0.333	3.18919
76	0.579	255	255	255	28.552	33.318	1.062	147.629	100	19125	323	385	65.556	0.703	1.51067
96	0.309	255	255	255	30.204	40.628	1.062	78.736	100	10200	343	456	114.444	0.703	1.51067
3	0.309	255	255	255	0.277	2.642	1.069	78.736	100	10200	3	25	99.462	0.527	2.02846
23	0.324	255	255	255	39.101	15.884	1.072	82.672	100	10710	440	177	145.008	0.471	2.27601
102	0.247	255	255	255	47.702	43.051	1.072	62.988	100	8160	538	486	145.008	0.393	2.72774
4	0.255	255	255	255	64.058	2.951	1.087	64.957	100	8415	728	27	104.036	0.351	3.09687
254	0.533	255	255	255	81.768	86.084	1.111	135.819	100	17595	929	986	71.565	0.703	1.58037
9	0.262	255	255	255	45.759	9.14	1.142	66.925	100	8670	518	98	112.62	0.426	2.68075
42	0.27	255	255	255	32.07	23.706	1.142	68.894	100	8925	362	263	112.62	0.445	2.56629
81	0.394	255	255	255	44.153	34.612	1.142	100.388	100	13005	500	388	112.62	0.439	2.60137
104	0.208	255	255	255	57.526	43.391	1.142	53.146	100	6885	652	500	67.38	0.306	3.73203
110	0.386	255	255	255	22.423	45.108	1.142	98.419	100	12750	253	521	67.38	0.615	1.85691
117	0.247	255	255	255	47.941	48.556	1.142	62.988	100	8160	543	547	112.62	0.36	3.17222
41	0.293	255	255	255	39.985	23.622	1.146	74.799	100	9690	454	262	94.399	0.439	2.61048
178	0.509	255	255	255	32.098	65.394	1.146	129.914	100	16830	362	751	57.529	0.776	1.4768
184	0.425	255	255	255	16.093	66.553	1.172	108.261	100	14025	182	764	77.005	0.527	2.22391
50	0.201	255	255	255	56.459	26.564	1.179	51.178	100	6630	640	296	116.565	0.303	3.89109
164	0.324	255	255	255	35.441	62.673	1.179	82.672	100	10710	400	708	116.565	0.471	2.50318
221	0.278	255	255	255	28.64	73.997	1.179	70.862	100	9180	321	839	153.435	0.458	2.57424
134	0.371	255	255	255	55.518	54.566	1.182	94.483	100	12240	628	616	131.987	0.497	2.37827
208	0.27	255	255	255	27.438	70.534	1.182	68.894	100	8925	307	807	41.987	0.439	2.69248
6	0.394	255	255	255	67.377	3.684	1.195	100.388	100	13005	765	36	107.103	0.439	2.7221
87	0.332	255	255	255	43.871	36.965	1.195	84.641	100	10965	498	414	107.103	0.41	2.91463
233	0.247	255	255	255	69.716	79.098	1.195	62.988	100	8160	792	907	72.897	0.327	3.65443
15	0.394	255	255	255	41.611	13.555	1.221	100.388	100	13005	470	150	120.256	0.655	1.86412
139	0.394	255	255	255	60.546	55.107	1.221	100.388	100	13005	683	631	30.256	0.471	2.59236
21	0.386	255	255	255	51.476	15.405	1.224	98.419	100	12750	579	173	158.962	0.715	1.71189
72	0.239	255	255	255	23.522	31.883	1.224	61.02	100	7905	265	356	111.038	0.35	3.49714
243	0.455	255	255	255	59.299	83.191	1.224	116.135	100	15045	672	953	68.962	0.783	1.56322
204	0.378	255	255	255	72.902	69.806	1.243	96.451	100	12495	827	801	45	0.95	1.30842
73	0.394	255	255	255	61.779	31.916	1.249	100.388	100	13005	698	358	129.289	0.494	2.52834
108	0.702	255	255	255	47.16	44.528	1.249	179.123	100	23205	530	503	140.711	1.003	1.24526
236	0.648	255	255	255	79.247	79.646	1.249	165.345	100	21420	898	913	50.711	0.889	1.40495
25	0.286	241.216	0	255	43.069	17.492	1.258	68.894	94.595	8925	487	193	114.775	0.379	3.31926
31	0.417	255	255	255	57.943	20.367	1.258	106.293	100	13770	656	225	114.775	0.505	2.49109
217	0.208	255	255	255	33.827	72.58	1.258	53.146	100	6885	382	820	114.775	0.326	3.8589
51	0.316	255	255	255	27.55	26.824	1.279	80.704	100	10455	312	298	105.945	0.373	3.42895
192	0.486	255	255	255	28.224	67.936	1.279	124.008	100	16065	314	775	15.945	0.527	2.42694
193	0.34	255	255	255	21.887	68.901	1.279	86.609	100	11220	247	777	105.945	0.41	3.11951
137	0.425	255	255	255	17.542	54.911	1.297	108.261	100	14025	197	618	118.301	0.536	2.41978
66	0.425	255	255	255	26.654	30.132	1.306	108.261	100	14025	298	347	47.726	0.808	1.61634
211	0.239	255	255	255	32.56	71.638	1.306	61.02	100	7905	368	822	70.346	0.31	4.2129
180	0.286	255	255	255	69.702	65.736	1.33	72.83	100	9435	792	741	97.595	0.349	3.81089
187	0.517	255	255	255	49.662	67.342	1.33	131.882	100	17085	563	774	82.405	0.525	2.53333
36	0.432	255	255	255	39.883	22.071	1.338	110.23	100	14280	449	259	66.801	0.806	1.66005
83	0.394	255	255	255	60.966	35.058	1.338	100.388	100	13005	691	406	66.801	0.473	2.82875
159	0.563	255	255	255	48.401	60.995	1.338	143.692	100	18615	544	697	23.199	0.61	2.19344
220	0.347	255	255	255	26.212	74.148	1.341	88.577	100	11475	294	850	58.392	0.403	3.32754
16	0.417	255	255	255	43.009	14.261	1.344	106.293	100	13770	489	153	101.31	0.615	2.18537
99	0.471	255	255	255	21.392	41.284	1.344	120.072	100	15555	242	463	101.31	0.439	3.0615
172	0.594	255	255	255	20.222	64.201	1.344	151.566	100	19635	229	723	101.31	0.615	2.18537
112	0.239	255	255	255	22.36	46.612	1.364	61.02	100	7905	253	523	104.931	0.306	4.45752
148	0.355	255	255	255	72.037	58.237	1.364	90.546	100	11730	818	671	75.069	0.351	3.88604
188	0.417	255	255	255	31.733	67.687	1.364	106.293	100	13770	361	779	75.069	0.788	1.73096
44	0.401	255	255	255	42.404	24.462	1.375	102.356	100	13260	479	271	116.565	0.497	2.7666
56	0.378	255	255	255	32.24	27.897	1.375	96.451	100	12495	363	311	116.565	0.445	3.08989
150	0.363	255	255	255	36.868	58.864	1.375	92.514	100	11985	415	676	63.435	0.583	2.35849
94	0.347	255	255	255	25.677	39.983	1.389	88.577	100	11475	288	447	108.435	0.539	2.57699
35	0.332	255	255	255	21.371	22.039	1.417	84.641	100	10965	239	257	60.255	0.55	2.57636
113	0.232	255	255	255	57.044	46.829	1.417	59.052	100	7650	642	529	150.255	0.345	4.10725
90	0.509	255	255	255	22.167	38.244	1.419	129.914	100	16830	249	428	111.801	0.571	2.48511
244	0.332	255	255	255	57.749	83.679	1.43	84.641	100	10965	656	944	100.62	0.351	4.07407
175	0.919	255	255	255	16.931	65.395	1.441	234.238	100	30345	187	749	52.431	1.054	1.36717
85	0.618	255	255	255	41.813	36.325	1.449	157.471	100	20400	474	421	75.964	0.703	2.06117
261	0.316	255	255	255	83.893	88.884	1.449	80.704	100	10455	947	1011	165.964	0.448	3.23438
53	0.509	255	255	255	58.338	27.517	1.462	129.914	100	16830	660	320	57.265	0.534	2.73783
210	0.432	255	255	255	33.983	71.423	1.462	110.23	100	14280	383	806	122.735	0.536	2.72761
162	0.278	255	255	255	29.828	62.053	1.473	70.862	100	9180	337	715	72.646	0.324	4.5463
212	0.525	255	255	255	35.709	72.292	1.473	133.85	100	17340	404	814	107.354	0.575	2.56174
163	0.309	255	255	255	51.281	62.56	1.491	78.736	100	10200	578	718	45	0.373	3.99732
128	0.44	255	255	255	38.329	53.422	1.496	112.198	100	14535	430	614	40.236	0.435	3.43908
97	0.347	255	255	255	27.848	40.869	1.501	88.577	100	11475	314	474	69.444	0.389	3.85861
133	0.394	255	255	255	22.462	54.825	1.517	100.388	100	13005	254	616	100.008	0.419	3.62053
156	0.417	255	255	255	71.41	60.208	1.517	106.293	100	13770	811	693	79.992	0.351	4.32194
239	0.332	255	255	255	66.486	80.948	1.517	84.641	100	10965	754	912	100.008	0.401	3.78304
33	0.517	255	255	255	46.618	21.521	1.534	131.882	100	17085	527	253	66.371	0.589	2.60441
60	0.324	255	255	255	36.127	28.715	1.554	82.672	100	10710	405	321	137.291	0.368	4.22283
170	0.278	255	255	255	25.42	63.937	1.554	70.862	100	9180	282	720	132.709	0.431	3.60557
125	0.509	255	255	255	18.301	52.631	1.557	129.914	100	16830	207	589	106.39	0.533	2.9212
67	0.432	255	255	255	32.246	30.473	1.564	110.23	100	14280	360	341	128.157	0.724	2.16022
253	0.44	255	255	255	55.876	85.823	1.572	112.198	100	14535	632	985	63.435	0.408	3.85294
13	0.394	255	255	255	39.325	13.771	1.584	100.388	100	13005	443	149	123.69	0.407	3.89189
135	0.316	255	255	255	32.768	54.973	1.584	80.704	100	10455	370	617	109.44	0.333	4.75676
88	0.255	255	255	255	35.736	37.485	1.591	64.957	100	8415	406	417	96.34	0.264	6.02652
153	0.293	255	255	255	50.239	59.721	1.591	74.799	100	9690	571	671	96.34	0.264	6.02652
207	0.301	255	255	255	69.741	70.836	1.591	76.767	100	9945	793	815	83.66	0.292	5.44863
34	0.448	255	255	255	53.573	22.083	1.603	114.167	100	14790	608	241	99.462	0.527	3.04175
100	0.363	255	255	255	32.133	41.545	1.603	92.514	100	11985	364	464	99.462	0.351	4.56695
68	0.316	255	255	255	37.277	30.887	1.613	80.704	100	10455	419	344	119.358	0.451	3.5765
79	0.633	255	255	255	57.941	33.733	1.613	161.408	100	20910	654	376	119.358	0.932	1.73069
84	0.54	255	255	255	21.469	36.263	1.62	137.787	100	17850	242	421	77.471	0.527	3.074
1	0.347	255	255	255	57.798	0.429	1.658	88.577	100	11475	651	0	147.995	0.416	3.98558
242	0.718	255	255	255	55.901	83.181	1.658	183.06	100	23715	631	938	122.005	0.668	2.48204
22	0.618	255	255	255	54.063	16.197	1.667	157.471	100	20400	613	174	108.435	0.879	1.89647
130	0.587	255	255	255	21.04	54.223	1.697	149.598	100	19380	236	608	111.251	0.479	3.5428
131	0.888	255	255	255	61.825	54.257	1.706	226.365	100	29325	702	609	101.889	0.966	1.76605
45	0.316	255	255	255	57.504	25.487	1.726	80.704	100	10455	652	280	104.744	0.361	4.78116
127	0.54	255	255	255	36.685	53.524	1.726	137.787	100	17850	415	600	104.744	0.791	2.18205
64	0.556	255	255	255	37.983	29.789	1.731	141.724	100	18360	428	329	113.962	0.586	2.95392
82	0.741	255	255	255	32.603	34.908	1.731	188.965	100	24480	367	407	66.038	0.703	2.4623
145	0.579	255	255	255	68.963	57.042	1.733	147.629	100	19125	779	640	120.466	0.628	2.75955
48	0.262	255	255	255	30.472	25.924	1.744	66.925	100	8670	341	289	139.086	0.435	4.0092
190	0.386	255	255	255	13.794	68.129	1.744	98.419	100	12750	149	782	40.914	0.412	4.23301
158	0.934	255	255	255	67.729	61.297	1.766	238.175	100	30855	768	688	95.711	1.116	1.58244
115	0.818	255	255	255	20.658	48.106	1.768	208.649	100	27030	230	540	116.565	0.703	2.51494
43	0.44	255	255	255	33.874	24.55	1.779	112.198	100	14535	382	289	69.775	0.394	4.51523
196	0.54	255	255	255	14.517	69.265	1.779	137.787	100	17850	158	794	32.905	0.51	3.48824
123	0.301	255	255	255	62.162	51.351	1.803	76.767	100	9945	700	591	46.975	0.373	4.83378
57	0.641	255	255	255	21.082	28.4	1.811	163.376	100	21165	236	332	75.964	0.722	2.50831
58	0.849	255	255	255	27.811	28.822	1.811	216.523	100	28050	315	338	75.964	0.776	2.33376
227	0.324	255	255	255	54.362	76.293	1.811	82.672	100	10710	611	875	39.094	0.339	5.34218
177	0.425	255	255	255	13.32	65.313	1.862	108.261	100	14025	142	740	160.71	0.362	5.14365
39	0.455	255	255	255	20.868	23.782	1.864	116.135	100	15045	236	261	98.13	0.404	4.61386
20	0.324	255	255	255	49.803	15.17	1.878	82.672	100	10710	557	170	169.216	0.331	5.67372
7	0.371	255	255	255	41.788	5.63	1.893	94.483	100	12240	472	54	111.801	0.359	5.27298
63	0.409	255	255	255	43.312	29.523	1.927	104.325	100	13515	489	327	114.228	0.386	4.99223
27	0.502	255	255	255	20.483	19.085	1.941	127.945	100	16575	233	206	95.194	0.351	5.52991
151	0.88	252.763	0	255	15.454	58.895	1.951	222.428	99.123	28815	165	669	7.765	0.751	2.59787
91	0.587	255	255	255	23.735	39.482	1.974	149.598	100	19380	265	440	122.276	0.694	2.84438
121	0.888	255	255	255	21.133	50.91	1.974	226.365	100	29325	237	590	69.146	0.703	2.80797
124	0.687	255	255	255	58.453	51.961	1.974	175.187	100	22695	662	579	110.854	0.778	2.53728
205	0.811	255	255	255	51.298	70.361	1.974	206.681	100	26775	580	812	69.146	0.631	3.12837
46	0.509	255	255	255	40.544	26.081	2.003	129.914	100	16830	458	306	74.745	0.636	3.14937
248	0.656	255	255	255	83.339	84.968	2.005	167.313	100	21675	942	957	118.811	0.511	3.92368
181	0.949	255	255	255	51.35	66.198	2.028	242.112	100	31365	585	742	94.97	0.703	2.88478
176	1.235	255	255	255	28.131	65.729	2.049	314.942	100	40800	316	738	120.964	1.325	1.54642
49	0.409	255	255	255	29.15	26.798	2.112	104.325	100	13515	328	293	106.928	0.39	5.41538
129	0.324	255	255	255	66.607	54.14	2.116	82.672	100	10710	757	606	94.764	0.282	7.50355
132	0.525	255	255	255	49.4	54.656	2.116	133.85	100	17340	554	631	48.366	0.389	5.43959
169	1.274	255	255	255	71.432	64.418	2.116	324.784	100	42075	812	718	94.764	1.454	1.4553
116	0.787	255	255	255	19.727	49.09	2.125	200.776	100	26010	223	545	119.745	1.305	1.62835
114	0.625	255	255	255	35.723	47.96	2.14	159.439	100	20655	402	557	70.821	0.469	4.5629
199	0.934	255	255	255	65.789	69.82	2.14	238.175	100	30855	744	783	109.179	0.747	2.86479
28	0.811	255	255	255	42.068	19.322	2.154	206.681	100	26775	479	208	101.768	0.796	2.70603
152	1.096	244.225	0	255	19.637	59.792	2.182	267.701	95.775	34680	214	672	130.101	1.093	1.99634
258	0.363	255	255	255	78.926	87.759	2.202	92.514	100	11985	888	1005	28.61	0.349	6.30946
103	0.98	255	255	255	20.047	43.785	2.212	249.985	100	32385	228	513	83.157	0.945	2.34074
186	1.05	255	255	255	34.589	66.93	2.212	267.701	100	34680	381	761	6.843	1.012	2.18577
78	0.563	255	255	255	22.48	34.127	2.224	143.692	100	18615	253	401	80.91	0.529	4.20416
247	0.633	255	255	255	52.534	84.467	2.252	161.408	100	20910	586	967	20.556	0.505	4.45941
219	0.656	255	255	255	66.74	74.38	2.284	167.313	100	21675	753	860	67.38	0.497	4.59557
24	0.803	255	255	255	41.612	17.449	2.299	204.712	100	26520	471	210	83.418	0.879	2.61547
228	0.772	255	255	255	53.038	77.341	2.326	196.839	100	25500	602	893	79.114	1.237	1.88036
8	0.571	255	255	255	24.174	9.035	2.357	145.661	100	18870	270	91	116.565	0.436	5.40596
223	0.749	255	255	255	68.444	75.391	2.366	190.934	100	24735	774	871	68.199	0.528	4.48106
203	0.509	255	255	255	31.777	70.363	2.374	129.914	100	16830	354	811	51.009	0.439	5.40774
182	0.772	255	255	255	13.924	65.909	2.387	196.839	100	25500	147	747	173.66	0.596	4.00503
147	1.829	255	255	255	40.683	58.35	2.39	466.508	100	60435	461	679	72.897	2.021	1.18258
55	0.764	255	255	255	57.286	28.389	2.4	194.87	100	25245	648	333	66.251	0.941	2.55048
142	0.949	255	255	255	70.047	56.99	2.4	242.112	100	31365	794	660	66.251	0.929	2.58342
5	0.648	255	255	255	63.26	3.595	2.43	165.345	100	21420	709	32	139.399	0.467	5.20343
71	0.664	255	255	255	28.155	32.236	2.474	169.281	100	21930	317	381	73.496	0.578	4.28028
232	1.289	255	255	255	63.335	79.648	2.485	328.721	100	42585	721	922	81.87	1.348	1.84347
40	0.641	255	255	255	25.618	23.633	2.513	163.376	100	21165	282	278	36.469	0.492	5.10772
59	1.034	255	255	255	29.433	29.253	2.516	263.764	100	34170	328	346	65.225	0.885	2.84294
111	0.849	255	255	255	39.216	46.717	2.53	216.523	100	28050	441	545	69.677	0.594	4.25926
183	0.494	255	255	255	72.492	66.819	2.612	125.977	100	16320	821	747	109.654	0.412	6.33981
174	1.05	255	255	255	15.41	64.785	2.621	267.701	100	34680	157	740	13.57	1.05	2.49619
138	1.05	255	255	255	64.387	55.399	2.643	267.701	100	34680	716	626	158.552	1.053	2.50997
235	0.679	255	255	255	61.66	80.087	2.672	173.218	100	22440	692	923	46.332	0.559	4.77996
136	1.289	255	255	255	39.755	55.127	2.707	328.721	100	42585	441	620	144.246	1.525	1.77508
146	1.706	255	255	255	55.518	58.287	2.707	435.014	100	56355	626	647	103.134	1.909	1.41802
161	1.274	255	255	255	69.081	62.152	2.736	324.784	100	42075	776	718	47.603	1.34	2.04179
240	0.756	255	255	255	56.204	82.032	2.746	192.902	100	24990	623	931	172.648	0.512	5.36328
122	0.803	255	255	255	40.052	50.836	2.803	204.712	100	26520	443	569	147.804	0.56	5.00536
70	1.011	255	255	255	24.559	32.148	2.807	257.859	100	33405	272	353	110.136	0.702	3.99858
250	1.243	255	255	255	59.975	84.916	2.833	316.911	100	41055	665	968	7.125	1.274	2.2237
19	0.563	255	255	255	45.242	16.069	2.839	143.692	100	18615	509	197	68.199	0.425	6.68
11	0.857	255	255	255	51.304	12.739	2.952	218.491	100	28305	572	136	143.471	0.96	3.075
197	1.814	255	255	255	17.779	69.819	2.953	462.571	100	59925	188	787	149.621	0.991	2.97982
200	0.602	255	255	255	36.109	69.576	3.003	153.534	100	19890	397	799	20.556	0.5	6.006
61	0.648	255	255	255	22.386	29.763	3.005	165.345	100	21420	252	322	105.255	0.588	5.11054
118	0.98	255	255	255	62.379	49.919	3.03	249.985	100	32385	699	585	60.461	1.211	2.50206
225	1.59	255	255	255	53.108	75.055	3.09	405.488	100	52530	586	854	165.174	1.327	2.32856
213	1.482	255	255	255	26.526	72.718	3.231	377.931	100	48960	288	820	157.62	1.181	2.73582
216	1.065	255	255	255	70.358	73.678	3.312	271.638	100	35190	795	853	68.199	0.604	5.48344
126	1.042	255	255	255	59.34	53.643	3.34	265.732	100	34425	668	625	63.435	0.725	4.6069
77	1.073	255	255	255	21.279	34.551	3.422	273.606	100	35445	233	409	60.803	1.231	2.77985
179	1.42	255	255	255	70.352	66.707	3.606	362.184	100	46920	801	781	87.207	0.879	4.10239
30	1.32	255	255	255	41.457	20.742	3.615	336.594	100	43605	464	217	115.942	0.719	5.02782
95	1.366	255	255	255	45.223	41.691	3.753	348.405	100	45135	502	454	122.574	0.838	4.47852
218	1.976	255	255	255	67.86	74.7	3.9	503.908	100	65280	763	870	67.479	0.765	5.09804
98	1.135	255	255	255	22.046	42.476	3.914	289.353	100	37485	246	506	80.961	0.603	6.49088
75	1.837	255	255	255	26.595	34.435	4.07	468.477	100	60690	298	371	103.736	1.098	3.70674
155	2.879	255	255	255	13.709	60.537	4.115	734.209	100	95115	129	682	163.887	2.455	1.67617
119	1.644	255	255	255	19.317	51.574	4.155	419.267	100	54315	215	565	103.449	1.086	3.82597
93	1.799	255	255	255	20.55	40.945	4.163	458.635	100	59415	230	444	97.275	1.411	2.95039
69	2.439	255	255	255	41.406	32.45	4.232	622.011	100	80580	468	397	85.236	1.797	2.35504
166	2.084	255	255	255	34.683	64.649	4.446	531.465	100	68850	386	713	127.776	2.529	1.75801
120	3.396	253.841	0	255	64.009	51.966	4.523	862.154	99.545	111690	730	616	82.185	1.776	2.54673
234	3.273	254.399	0	255	80.87	81.286	4.677	832.628	99.764	107865	914	950	84.611	2.254	2.07498
154	5.187	255	255	255	17.411	61.351	4.709	1322.76	100	171360	180	677	126.656	3.319	1.4188
229	1.93	255	255	255	65.848	78.997	4.835	492.097	100	63750	741	920	70.907	0.945	5.1164
14	2.115	255	255	255	37.263	15.479	4.846	539.339	100	69870	406	150	112.38	1.915	2.53055
157	1.799	255	255	255	39.95	61.51	4.847	458.635	100	59415	429	680	133.531	1.926	2.51661
149	5.843	246.915	0	255	66.353	60.277	5.033	1442.83	96.83	186915	759	714	73.78	3.985	1.26299
160	1.474	255	255	255	49.6	63.198	5.059	375.962	100	48705	555	745	69.677	0.597	8.47404
141	4.77	254.175	0	255	59.789	57.751	5.196	1212.53	99.676	157080	673	625	108.741	3.794	1.36953
74	4.523	237.159	0	255	24.209	35.486	5.283	1072.77	93.003	138975	271	429	86.186	2.665	1.98236
105	3.041	255	255	255	33.523	44.473	5.319	775.545	100	100470	359	490	120.801	3.11	1.71029
86	0.208	255	255	255	82.508	21.27	0.634	53.146	100	6885	936	240	146.31	0.527	1.20304
99	0.201	255	255	255	83.517	23.573	0.64	51.178	100	6630	949	265	105.945	0.527	1.21442
58	0.293	255	255	255	20.399	16.388	0.708	74.799	100	9690	230	183	119.745	0.615	1.15122
59	0.293	255	255	255	55.702	16.561	0.708	74.799	100	9690	632	185	119.745	0.527	1.34345
157	0.239	255	255	255	71.048	35.012	0.708	61.02	100	7905	807	395	119.745	0.55	1.28727
214	0.232	255	255	255	32.08	47.391	0.708	59.052	100	7650	363	536	119.745	0.497	1.42455
264	0.247	255	255	255	46.016	56.265	0.708	62.988	100	8160	522	637	119.745	0.55	1.28727
164	0.247	255	255	255	35.819	36.45	0.725	62.988	100	8160	407	411	104.036	0.439	1.65148
238	0.239	255	255	255	51.577	51.141	0.725	61.02	100	7905	587	578	104.036	0.527	1.37571
31	0.208	255	255	255	37.345	4.857	0.751	53.146	100	6885	421	57	20.556	0.414	1.81401
308	0.201	255	255	255	23.218	68.175	0.751	51.178	100	6630	260	777	20.556	0.351	2.1396
114	0.332	255	255	255	55.473	27.094	0.756	84.641	100	10965	628	311	35.538	0.615	1.22927
165	0.309	255	255	255	47.132	36.6	0.756	78.736	100	10200	533	419	35.538	0.615	1.22927
263	0.247	255	255	255	53.926	55.815	0.756	62.988	100	8160	611	632	125.538	0.511	1.47945
300	0.347	255	255	255	22.096	65.762	0.756	88.577	100	11475	249	745	125.538	0.615	1.22927
329	0.324	255	255	255	80.238	76.833	0.756	82.672	100	10710	911	878	54.462	0.615	1.22927
331	0.262	255	255	255	5.83	76.967	0.786	66.925	100	8670	62	874	153.435	0.527	1.49146
253	0.278	255	255	255	15.912	53.548	0.81	70.862	100	9180	178	606	130.601	0.559	1.44902
355	0.201	255	255	255	47.207	84.297	0.81	51.178	100	6630	533	958	167.471	0.396	2.04545
361	0.232	255	255	255	0.249	86.318	0.81	59.052	100	7650	0	986	49.399	0.497	1.62978
46	0.262	255	255	255	9.3	9.667	0.829	66.925	100	8670	104	105	122.005	0.676	1.22633
51	0.378	255	255	255	28.81	11.408	0.829	96.451	100	12495	324	127	147.995	0.695	1.19281
267	0.232	255	255	255	56.602	57.035	0.829	59.052	100	7650	641	647	147.995	0.527	1.57306
36	0.286	255	255	255	13.356	6.125	0.834	72.83	100	9435	152	65	108.435	0.517	1.61315
77	0.34	255	255	255	86.269	19.798	0.834	86.609	100	11220	980	221	108.435	0.527	1.58254
15	0.27	255	255	255	89.567	1.716	0.865	68.894	100	8925	1018	15	113.962	0.5	1.73
27	0.247	255	255	255	11.164	3.66	0.865	62.988	100	8160	124	46	66.038	0.527	1.64137
130	0.432	255	255	255	71.763	29.309	0.865	110.23	100	14280	812	332	156.038	0.703	1.23044
138	0.293	255	255	255	72.141	31.474	0.865	74.799	100	9690	816	360	23.962	0.727	1.18982
278	0.278	255	255	255	53.613	61.313	0.865	70.862	100	9180	608	693	113.962	0.439	1.97039
328	0.201	255	255	255	86.862	76.204	0.865	51.178	100	6630	984	866	156.038	0.417	2.07434
96	0.309	255	255	255	57.163	23.37	0.896	78.736	100	10200	650	271	78.69	0.527	1.70019
141	0.409	255	255	255	76.829	31.872	0.896	104.325	100	13515	873	358	101.31	0.615	1.45691
317	0.216	255	255	255	35.46	71.357	0.905	55.115	100	7140	401	816	60.945	0.432	2.09491
117	0.239	255	255	255	78.309	27.722	0.917	61.02	100	7905	889	321	73.301	0.439	2.08884
125	0.201	255	255	255	79.992	28.071	0.934	51.178	100	6630	906	316	138.814	0.354	2.63842
172	0.27	255	255	255	30.636	37.906	0.934	68.894	100	8925	344	429	138.814	0.621	1.50403
182	0.232	255	255	255	60.09	41.663	0.934	59.052	100	7650	680	470	138.814	0.545	1.71376
369	0.239	255	255	255	11.967	87.996	0.946	61.02	100	7905	131	1003	21.801	0.472	2.00424
4	0.255	255	255	255	82.474	0.313	0.95	64.957	100	8415	936	9	56.31	0.527	1.80266
128	0.355	255	255	255	78.756	28.896	0.95	90.546	100	11730	892	327	146.31	0.65	1.46154
173	0.224	255	255	255	50.017	38.787	0.95	57.083	100	7395	567	437	123.69	0.432	2.19907
307	0.208	255	255	255	24.01	67.165	0.95	53.146	100	6885	272	760	123.69	0.436	2.1789
108	0.278	255	255	255	47.241	25.247	0.982	70.862	100	9180	535	283	116.565	0.439	2.2369
373	0.224	255	255	255	8.539	89.369	0.994	57.083	100	7395	93	1021	45	0.425	2.33882
13	0.224	255	255	255	39.662	1.541	1.002	57.083	100	7395	446	16	164.745	0.435	2.30345
35	0.471	255	255	255	15.215	6.112	1.002	120.072	100	15555	172	64	105.255	0.682	1.46921
194	0.324	255	255	255	74.333	44.394	1.002	82.672	100	10710	844	500	105.255	0.603	1.66169
196	0.208	255	255	255	53.332	44.663	1.002	53.146	100	6885	603	513	52.125	0.435	2.30345
364	0.208	255	255	255	13.682	86.835	1.002	53.146	100	6885	151	992	37.875	0.362	2.76796
30	0.232	255	255	255	8.721	4.657	1.025	59.052	100	7650	97	47	120.964	0.432	2.37269
65	0.255	255	255	255	78.595	17.648	1.025	64.957	100	8415	892	206	59.036	0.549	1.86703
78	0.262	255	255	255	49.999	19.928	1.025	66.925	100	8670	566	222	120.964	0.432	2.37269
126	0.363	255	255	255	51.15	28.4	1.025	92.514	100	11985	579	329	59.036	0.668	1.53443
240	0.286	255	255	255	41.454	51.548	1.025	72.83	100	9435	467	590	30.964	0.432	2.37269
190	0.316	255	255	255	33.435	44.136	1.028	80.704	100	10455	375	499	160.017	0.514	2
371	0.347	255	255	255	18.418	89.357	1.028	88.577	100	11475	207	1022	70.017	0.615	1.67154
89	0.216	255	255	255	54.215	22.131	1.058	55.115	100	7140	612	248	138.366	0.369	2.86721
101	0.216	255	255	255	25.382	23.998	1.062	55.115	100	7140	287	278	65.556	0.389	2.73008
352	0.201	255	255	255	82.009	84.067	1.087	51.178	100	6630	932	963	75.964	0.264	4.11742
372	0.316	255	255	255	59.732	89.193	1.087	80.704	100	10455	673	1017	14.036	0.527	2.06262
120	0.239	255	255	255	87.106	27.938	1.101	61.02	100	7905	989	313	118.61	0.465	2.36774
208	0.332	255	255	255	19.028	46.75	1.101	84.641	100	10965	211	535	28.61	0.432	2.54861
288	0.232	255	255	255	17.926	63.276	1.101	59.052	100	7650	198	716	151.39	0.471	2.33758
348	0.201	255	255	255	79.691	83.773	1.101	51.178	100	6630	904	948	118.61	0.314	3.50637
23	0.201	255	255	255	12.226	3.16	1.111	51.178	100	6630	133	37	18.435	0.482	2.30498
25	0.301	255	255	255	47.853	3.205	1.111	76.767	100	9945	539	34	161.565	0.447	2.48546
159	0.286	255	255	255	47.148	35.154	1.111	72.83	100	9435	531	403	18.435	0.426	2.60798
250	0.309	255	255	255	57.449	53.39	1.111	78.736	100	10200	652	614	71.565	0.351	3.16524
257	0.301	255	255	255	38.08	54.498	1.111	76.767	100	9945	431	626	71.565	0.469	2.36887
314	0.247	255	255	255	34.067	69.892	1.111	62.988	100	8160	381	793	161.565	0.439	2.53075
64	0.201	255	255	255	48.812	17.376	1.118	51.178	100	6630	551	193	135	0.311	3.59486
7	0.479	255	255	255	58.092	1.169	1.125	122.04	100	15810	659	19	51.34	0.838	1.34248
63	0.208	255	255	255	75.062	17.163	1.125	53.146	100	6885	851	201	51.34	0.48	2.34375
351	0.224	255	255	255	18.94	84.052	1.125	57.083	100	7395	212	961	51.34	0.435	2.58621
109	0.27	255	255	255	29.956	26.063	1.142	68.894	100	8925	339	289	112.62	0.527	2.16698
113	0.417	255	255	255	50.447	26.947	1.142	106.293	100	13770	570	302	112.62	0.689	1.65747
136	0.247	255	255	255	76.218	30.959	1.142	62.988	100	8160	865	358	67.38	0.424	2.6934
215	0.286	255	255	255	10.763	47.713	1.142	72.83	100	9435	120	537	112.62	0.392	2.91327
268	0.394	255	255	255	2.263	58.148	1.142	100.388	100	13005	20	658	157.38	0.583	1.95883
320	0.602	255	255	255	32.93	73.898	1.142	153.534	100	19890	371	836	112.62	0.842	1.35629
156	0.262	255	255	255	37.753	35.022	1.146	66.925	100	8670	424	402	32.471	0.393	2.91603
207	0.239	255	255	255	55.585	46.059	1.146	61.02	100	7905	627	528	32.471	0.411	2.78832
241	0.394	255	255	255	30.801	51.905	1.146	100.388	100	13005	345	586	147.529	0.629	1.82194
244	0.417	255	255	255	57.364	52.037	1.146	106.293	100	13770	648	588	122.471	0.658	1.74164
271	0.316	255	255	255	50.711	59.923	1.156	80.704	100	10455	571	684	8.746	0.615	1.87967
21	0.486	255	255	255	15.854	3.112	1.172	124.008	100	16065	179	28	102.995	0.987	1.18744
289	0.278	255	255	255	33.772	63.788	1.172	70.862	100	9180	383	733	77.005	0.351	3.33903
28	0.355	255	255	255	37.296	3.956	1.179	90.546	100	11730	421	51	63.435	0.506	2.33004
311	0.247	255	255	255	55.848	69.606	1.179	62.988	100	8160	629	795	26.565	0.389	3.03085
342	0.224	255	255	255	72.2	81.298	1.179	57.083	100	7395	817	923	153.435	0.456	2.58553
54	0.301	255	255	255	34.825	15.494	1.182	76.767	100	9945	393	171	131.987	0.543	2.1768
204	0.409	255	255	255	72.831	45.996	1.182	104.325	100	13515	823	527	41.987	0.731	1.61696
231	0.247	255	255	255	84.479	49.961	1.182	62.988	100	8160	958	564	131.987	0.555	2.12973
90	0.216	255	255	255	0.48	22.316	1.195	55.115	100	7140	0	250	143.973	0.388	3.0799
179	0.625	255	255	255	59.21	40.663	1.195	159.439	100	20655	668	465	17.103	0.874	1.36728
333	0.394	255	255	255	11.715	78.021	1.195	100.388	100	13005	127	886	162.897	0.615	1.94309
158	0.332	255	255	255	25.182	35.328	1.221	84.641	100	10965	283	408	59.744	0.508	2.40354
10	0.293	255	255	255	84.351	1.309	1.224	74.799	100	9690	954	13	158.962	0.445	2.75056
202	0.286	255	255	255	32.143	45.847	1.224	72.83	100	9435	360	518	158.962	0.473	2.58774
37	0.239	255	255	255	8.082	7.234	1.243	61.02	100	7905	92	75	98.13	0.34	3.65588
94	0.332	255	255	255	85.567	23.369	1.243	84.641	100	10965	969	260	135	0.497	2.50101
20	0.409	255	255	255	69.82	2.744	1.249	104.325	100	13515	790	27	129.289	0.559	2.23435
68	0.432	255	255	255	47.765	18.165	1.249	110.23	100	14280	538	211	39.289	0.621	2.01127
148	0.401	255	255	255	75.731	32.979	1.249	102.356	100	13260	857	371	129.289	0.844	1.47986
152	0.494	255	255	255	26.071	34.423	1.249	125.977	100	16320	293	397	50.711	0.683	1.8287
310	0.687	246.404	0	255	35.701	69.715	1.249	169.281	96.629	21930	401	788	140.711	0.941	1.32731
225	0.44	255	255	255	25.068	49.149	1.258	112.198	100	14535	282	566	65.225	0.889	1.41507
11	0.44	255	255	255	47.314	1.593	1.267	112.198	100	14535	533	13	123.69	0.786	1.61196
48	0.293	255	255	255	53.994	10.508	1.267	74.799	100	9690	609	124	33.69	0.497	2.5493
66	0.54	255	255	255	71.546	17.859	1.267	137.787	100	17850	810	197	123.69	0.629	2.01431
322	0.301	255	255	255	78.283	74.363	1.267	76.767	100	9945	885	842	146.31	0.387	3.2739
137	0.224	255	255	255	27.132	31.503	1.279	57.083	100	7395	307	352	105.945	0.316	4.04747
236	0.208	255	255	255	32.519	50.986	1.279	53.146	100	6885	368	573	105.945	0.32	3.99687
347	0.371	255	255	255	4.512	83.735	1.279	94.483	100	12240	49	960	74.055	0.426	3.00235
277	0.201	255	255	255	34.18	61.542	1.297	51.178	100	6630	386	706	61.699	0.306	4.23856
18	0.309	255	255	255	9.17	2.627	1.306	78.736	100	10200	99	25	137.726	0.435	3.0023
44	0.224	255	255	255	22.366	9.081	1.306	57.083	100	7395	250	98	132.274	0.311	4.19936
33	0.239	255	255	255	9.55	5.451	1.318	61.02	100	7905	104	57	126.87	0.461	2.859
285	0.363	255	255	255	57.758	63.069	1.318	92.514	100	11985	651	713	143.13	0.505	2.6099
69	0.255	255	255	255	8.713	18.313	1.341	64.957	100	8415	93	205	148.392	0.392	3.42092
181	0.216	255	255	255	25.627	40.974	1.341	55.115	100	7140	285	462	148.392	0.301	4.45515
22	0.262	255	255	255	34.684	2.902	1.344	66.925	100	8670	387	31	168.69	0.327	4.11009
47	0.262	255	255	255	34.43	10.068	1.344	66.925	100	8670	390	122	78.69	0.311	4.32154
24	0.401	255	255	255	44.879	3.524	1.364	102.356	100	13260	509	48	75.069	0.57	2.39298
72	0.324	255	255	255	71.446	19.243	1.364	82.672	100	10710	811	227	75.069	0.409	3.33496
258	0.471	255	255	255	33.969	54.815	1.364	120.072	100	15555	379	622	165.069	0.439	3.10706
286	0.255	255	255	255	12.656	63.358	1.364	64.957	100	8415	142	714	104.931	0.294	4.63946
290	0.301	255	255	255	49.653	63.838	1.364	76.767	100	9945	563	735	75.069	0.396	3.44444
367	0.347	255	255	255	8.32	87.864	1.364	88.577	100	11475	93	1007	75.069	0.439	3.10706
29	0.224	255	255	255	50.048	4.516	1.367	57.083	100	7395	565	46	135	0.384	3.5599
366	0.301	255	255	255	14.02	87.349	1.372	76.767	100	9945	153	999	39.806	0.413	3.32203
229	0.409	255	255	255	26.201	49.984	1.375	104.325	100	13515	293	562	116.565	0.608	2.26151
12	0.741	255	255	255	17.031	1.898	1.389	188.965	100	24480	186	25	34.695	0.982	1.41446
100	0.332	255	255	255	27.907	23.96	1.389	84.641	100	10965	313	266	124.695	0.403	3.44665
193	0.463	255	255	255	62.071	44.818	1.389	118.103	100	15300	701	515	71.565	1.066	1.303
298	0.355	255	255	255	11.935	65.844	1.408	90.546	100	11730	127	748	176.424	0.786	1.79135
41	0.702	255	255	255	19.827	8.527	1.417	179.123	100	23205	219	101	29.745	0.924	1.53355
115	0.378	255	255	255	56.453	27.485	1.417	96.451	100	12495	636	314	172.875	0.703	2.01565
235	0.262	255	255	255	19.329	50.571	1.417	66.925	100	8670	219	585	82.875	0.351	4.03704
70	0.509	255	255	255	51.188	18.434	1.419	129.914	100	16830	576	213	21.801	0.597	2.37688
111	0.286	255	255	255	58.171	26.048	1.419	72.83	100	9435	655	294	158.199	0.391	3.62916
183	0.448	255	255	255	28.762	41.869	1.419	114.167	100	14790	320	474	158.199	0.566	2.50707
249	0.201	255	255	255	47.745	53.036	1.419	51.178	100	6630	541	597	111.801	0.316	4.49051
26	0.394	255	255	255	26.464	3.675	1.43	100.388	100	13005	295	48	42.51	0.435	3.28736
81	0.378	255	255	255	53.328	20.719	1.43	96.451	100	12495	602	230	132.51	0.484	2.95455
91	0.301	255	255	255	2.937	22.482	1.43	76.767	100	9945	29	250	137.49	0.497	2.87726
305	0.502	255	255	255	54.766	67.245	1.43	127.945	100	16575	622	758	100.62	0.527	2.71347
74	0.517	255	255	255	0.853	19.423	1.441	131.882	100	17085	4	216	127.569	0.683	2.10981
198	0.471	255	255	255	78.702	45.079	1.441	120.072	100	15555	888	517	37.569	0.632	2.28006
306	0.34	255	255	255	36.1	67.314	1.441	86.609	100	11220	405	759	127.569	0.467	3.08565
316	0.34	255	255	255	0.517	71.281	1.441	86.609	100	11220	0	806	142.431	0.403	3.57568
87	0.301	255	255	255	39.783	21.294	1.449	76.767	100	9945	444	240	165.964	0.361	4.01385
177	0.386	255	255	255	33.139	40.375	1.454	98.419	100	12750	370	455	154.983	0.506	2.87352
187	0.255	255	255	255	58.915	43.081	1.462	64.957	100	8415	664	494	32.735	0.393	3.7201
161	0.316	255	255	255	69.699	35.62	1.473	80.704	100	10455	785	403	162.646	0.417	3.53237
266	0.309	255	255	255	50.455	57.438	1.473	78.736	100	10200	573	661	72.646	0.568	2.59331
186	0.301	255	255	255	55.791	42.887	1.491	76.767	100	9945	630	483	135	0.373	3.99732
295	0.324	255	255	255	39.037	65.095	1.494	82.672	100	10710	437	737	151.928	0.354	4.22034
346	0.278	255	255	255	20.073	82.673	1.496	70.862	100	9180	223	947	49.764	0.39	3.8359
118	0.355	255	255	255	53.644	28.119	1.504	90.546	100	11730	610	329	83.29	0.264	5.69697
294	0.301	255	255	255	4.41	64.773	1.504	76.767	100	9945	41	738	6.71	0.264	5.69697
349	0.386	255	255	255	5.484	84.299	1.504	98.419	100	12750	61	951	96.71	0.422	3.56398
341	0.44	255	255	255	87.303	81.335	1.512	112.198	100	14535	987	930	35.538	0.49	3.08571
106	0.324	255	255	255	85.363	25.021	1.517	82.672	100	10710	968	294	79.992	0.574	2.64286
239	0.27	255	255	255	47.079	51.544	1.517	68.894	100	8925	534	579	100.008	0.264	5.74621
144	0.517	255	255	255	68.989	32.485	1.534	131.882	100	17085	777	368	166.759	0.527	2.91082
83	0.425	255	255	255	43.93	20.839	1.537	108.261	100	14025	492	232	149.036	0.494	3.11134
259	0.224	255	255	255	2.904	55.537	1.537	57.083	100	7395	29	625	120.964	0.365	4.21096
301	0.417	255	255	255	20.689	66.32	1.537	106.293	100	13770	228	750	149.036	0.467	3.29122
8	0.54	255	255	255	24.001	1.533	1.554	137.787	100	17850	268	11	137.291	0.832	1.86779
209	0.594	255	255	255	73.78	47.016	1.554	151.566	100	19635	835	528	132.709	0.711	2.18565
84	0.286	255	255	255	52.042	21.208	1.557	72.83	100	9435	590	233	106.39	0.32	4.86562
162	0.286	255	255	255	51.693	36.199	1.557	72.83	100	9435	586	422	73.61	0.366	4.2541
169	0.27	255	255	255	21.404	37.668	1.557	68.894	100	8925	240	420	106.39	0.351	4.4359
356	0.363	255	255	255	73.982	84.364	1.557	92.514	100	11985	833	958	163.61	0.424	3.67217
280	0.224	255	255	255	50.266	61.933	1.564	57.083	100	7395	565	710	38.157	0.351	4.45584
39	0.332	255	255	255	11.108	7.841	1.572	84.641	100	10965	121	82	116.565	0.61	2.57705
330	0.401	255	255	255	28.429	77	1.572	102.356	100	13260	316	880	26.565	0.432	3.63889
55	0.494	255	255	255	34.194	16.069	1.584	125.977	100	16320	386	174	109.44	0.606	2.61386
124	0.309	255	255	255	30.465	28.205	1.584	78.736	100	10200	339	316	146.31	0.366	4.32787
149	0.386	255	255	255	24.787	33.056	1.584	98.419	100	12750	274	373	160.56	0.491	3.22607
200	0.278	255	255	255	34.165	45.699	1.584	70.862	100	9180	379	517	160.56	0.341	4.64516
203	0.502	255	255	255	53.608	46.198	1.584	127.945	100	16575	606	535	70.56	0.572	2.76923
318	0.301	255	255	255	31.326	71.752	1.584	76.767	100	9945	354	809	109.44	0.389	4.07198
312	0.525	255	255	255	26.527	70.079	1.613	133.85	100	17340	298	790	119.358	0.746	2.1622
345	0.432	255	255	255	72.278	82.481	1.613	110.23	100	14280	818	930	119.358	0.562	2.87011
121	0.309	255	255	255	77.342	28.266	1.615	78.736	100	10200	877	313	112.38	0.447	3.61298
274	0.363	255	255	255	56.889	60.777	1.615	92.514	100	11985	640	689	157.62	0.417	3.8729
281	0.479	255	255	255	6.988	61.892	1.615	122.04	100	15810	71	708	22.38	0.472	3.42161
195	0.232	255	255	255	69.736	44.752	1.62	59.052	100	7650	787	517	49.399	0.373	4.34316
197	0.486	255	255	255	31.17	44.806	1.62	124.008	100	16065	345	508	167.471	0.583	2.77873
252	0.633	255	255	255	38.768	53.592	1.62	161.408	100	20910	434	604	139.399	0.624	2.59615
260	0.316	255	255	255	49.084	55.866	1.62	80.704	100	10455	556	646	77.471	0.36	4.5
325	0.286	255	255	255	34.131	75.792	1.62	72.83	100	9435	382	857	139.399	0.311	5.209
216	0.502	255	255	255	8.213	47.92	1.634	127.945	100	16575	87	540	143.746	0.695	2.35108
93	0.479	255	255	255	42.182	22.914	1.641	122.04	100	15810	471	263	15.524	0.472	3.47669
105	0.787	255	255	255	73.913	24.968	1.641	200.776	100	26010	838	275	105.524	0.905	1.81326
139	0.34	255	255	255	49.818	31.987	1.641	86.609	100	11220	565	356	105.524	0.377	4.35279
82	0.363	255	255	255	80.575	20.874	1.651	92.514	100	11985	913	230	115.201	0.424	3.89387
251	0.448	255	255	255	40.571	53.654	1.658	114.167	100	14790	457	619	57.995	0.457	3.62801
365	0.548	255	255	255	16.181	87.35	1.658	139.756	100	18105	176	999	32.005	0.72	2.30278
315	0.286	255	255	255	53.151	71.376	1.688	72.83	100	9435	598	820	51.34	0.368	4.58696
6	0.471	255	255	255	48.097	0.665	1.69	120.072	100	15555	539	3	152.103	0.471	3.58811
185	0.494	255	255	255	85.19	42.513	1.69	125.977	100	16320	961	480	152.103	0.511	3.30724
246	0.44	255	255	255	49.384	52.701	1.697	112.198	100	14535	559	591	111.251	0.432	3.92824
276	0.371	255	255	255	39.542	61.635	1.706	94.483	100	12240	448	692	101.889	0.392	4.35204
210	0.888	255	255	255	40.629	47.133	1.731	226.365	100	29325	454	535	156.038	0.928	1.8653
360	0.664	255	255	255	17.582	86.146	1.733	169.281	100	21930	192	986	30.466	0.893	1.94065
245	0.764	255	255	255	32.64	52.553	1.744	194.87	100	25245	365	606	49.086	0.668	2.61078
56	0.293	255	255	255	15.657	16.187	1.768	74.799	100	9690	174	176	116.565	0.354	4.99435
230	0.741	255	255	255	44.654	49.967	1.768	188.965	100	24480	500	573	26.565	0.767	2.30508
175	0.733	255	255	255	31.817	39.195	1.777	186.997	100	24225	351	444	171.469	0.861	2.06388
73	0.409	255	255	255	43.59	19.413	1.779	104.325	100	13515	488	226	32.905	0.5	3.558
293	0.486	255	255	255	52.604	65.216	1.792	124.008	100	16065	598	733	101.31	0.559	3.20572
61	0.44	255	255	255	7.114	17.098	1.811	112.198	100	14535	72	189	157.166	0.57	3.17719
163	0.733	255	255	255	31.017	36.755	1.811	186.997	100	24225	349	407	112.834	0.751	2.41145
353	0.332	255	255	255	16.053	84.16	1.828	84.641	100	10965	175	964	35.218	0.394	4.63959
145	0.78	255	255	255	74.292	33.19	1.835	198.807	100	25755	834	380	16.699	1.395	1.31541
104	0.232	255	255	255	31.161	24.855	1.847	59.052	100	7650	354	273	92.726	0.264	6.99621
188	0.386	255	255	255	71.275	43.576	1.853	98.419	100	12750	802	501	31.43	0.474	3.90928
40	1.081	255	255	255	34.439	8.086	1.864	275.574	100	35700	382	91	8.13	1.396	1.33524
275	0.71	255	255	255	7.563	60.981	1.864	181.092	100	23460	77	690	171.87	0.703	2.65149
337	0.262	255	255	255	84.582	80.241	1.868	66.925	100	8670	955	922	48.814	0.331	5.6435
321	0.61	255	255	255	21.568	74.211	1.878	155.503	100	20145	234	843	169.216	0.469	4.00426
171	0.579	255	255	255	50.294	38.127	1.88	147.629	100	19125	565	425	127.405	0.674	2.78932
338	0.625	255	255	255	72.55	80.665	1.88	159.439	100	20655	816	912	142.595	0.738	2.54743
112	0.471	255	255	255	75.774	26.448	1.886	120.072	100	15555	853	297	152.241	0.463	4.07343
75	0.347	255	255	255	48.05	19.806	1.897	88.577	100	11475	545	216	103.392	0.345	5.49855
368	0.594	255	255	255	0.935	88.285	1.901	151.566	100	19635	6	1015	56.31	0.609	3.12151
176	0.455	255	255	255	85.732	40.426	1.927	116.135	100	15045	969	452	133.152	0.559	3.44723
218	0.895	255	255	255	52.88	47.987	1.927	228.333	100	29580	592	552	24.228	0.945	2.03915
340	0.479	255	255	255	68.567	81.614	1.929	122.04	100	15810	775	938	59.931	0.432	4.46528
178	0.648	255	255	255	28.205	40.684	1.935	165.345	100	21420	313	470	39.472	0.879	2.20137
303	0.463	255	255	255	48.494	67.02	1.935	118.103	100	15300	545	754	129.472	0.398	4.86181
370	0.903	255	255	255	6.058	88.567	1.935	230.301	100	29835	60	1014	39.472	0.806	2.40074
38	1.081	255	255	255	12.615	7.428	1.945	275.574	100	35700	139	75	108.435	0.999	1.94695
103	0.563	255	255	255	67.176	24.549	1.951	143.692	100	18615	759	289	54.162	0.545	3.57982
343	1.034	253.097	0	255	8.464	82.106	1.965	261.796	99.254	33915	93	945	63.435	1.056	1.8608
43	0.648	245.893	0	255	10.5	9.4	1.974	159.439	96.429	20655	116	98	122.276	0.707	2.79208
363	0.695	255	255	255	83.675	87.096	1.982	177.155	100	22950	951	1003	77.196	0.595	3.33109
282	0.502	255	255	255	1.193	62.656	1.988	127.945	100	16575	4	721	45	0.551	3.60799
2	0.818	255	255	255	28.96	0.675	2.003	208.649	100	27030	320	0	164.745	1.253	1.59856
57	0.509	255	255	255	80.742	16.953	2.003	129.914	100	16830	915	182	105.255	0.457	4.38293
191	0.772	255	255	255	81.97	44.269	2.007	196.839	100	25500	922	508	23.199	0.791	2.53729
79	0.625	248.704	0	255	51.237	20.095	2.023	155.503	97.531	20145	574	236	34.38	0.529	3.8242
205	0.772	255	255	255	33.825	46.208	2.023	196.839	100	25500	375	519	145.62	0.657	3.07915
168	0.486	255	255	255	29.355	37.654	2.051	124.008	100	16065	326	419	133.264	0.479	4.28184
184	0.942	255	255	255	73.103	42.828	2.057	240.143	100	31110	828	476	109.983	0.874	2.35355
19	0.988	255	255	255	25.459	2.68	2.068	251.954	100	32640	278	31	12.265	0.879	2.35267
3	0.486	255	255	255	70.402	1.125	2.083	124.008	100	16065	796	21	62.354	0.622	3.34887
60	0.502	255	255	255	22.197	17.33	2.096	127.945	100	16575	246	187	123.024	0.391	5.36061
140	0.386	255	255	255	51.847	32.077	2.116	98.419	100	12750	582	356	131.634	0.337	6.27893
247	1.058	255	255	255	37.564	52.968	2.116	269.669	100	34935	416	609	41.634	0.916	2.31004
102	0.741	255	255	255	76.041	24.556	2.125	188.965	100	24480	858	267	97.125	1.324	1.60498
232	0.602	255	255	255	3.365	50.025	2.138	153.534	100	19890	26	572	9.462	0.439	4.87016
220	0.733	249.632	0	255	59.814	48.194	2.161	183.06	97.895	23715	670	542	153.435	0.773	2.7956
234	0.641	255	255	255	37.812	50.342	2.174	163.376	100	21165	417	573	165.964	0.886	2.45372
222	0.834	255	255	255	89.254	49.172	2.217	212.586	100	27540	1010	545	123.69	1.365	1.62418
167	0.895	255	255	255	68.735	37.395	2.24	228.333	100	29580	775	414	115.56	0.738	3.03523
224	0.718	255	255	255	39.237	49.436	2.24	183.06	100	23715	444	552	101.31	0.563	3.97869
283	0.44	255	255	255	51.902	63.19	2.25	112.198	100	14535	582	707	128.66	0.456	4.93421
334	0.633	255	255	255	81.993	78.967	2.252	161.408	100	20910	923	892	159.444	0.834	2.70024
146	1.173	255	255	255	40.944	33.066	2.279	299.195	100	38760	456	369	152.447	0.984	2.31606
323	0.556	255	255	255	84.952	75.258	2.284	141.724	100	18360	956	853	157.38	0.773	2.95472
32	0.633	255	255	255	35.806	5.69	2.299	161.408	100	20910	398	74	43.452	0.682	3.37097
49	1.181	255	255	255	16.482	11.946	2.32	301.163	100	39015	181	145	52.696	1.773	1.30852
357	0.818	255	255	255	14.783	85.185	2.334	208.649	100	27030	156	965	160.201	0.722	3.23269
344	1.536	252.437	0	255	70.244	82.039	2.344	387.773	98.995	50235	788	938	12.995	1.513	1.54924
292	0.648	255	255	255	8.671	65.509	2.366	165.345	100	21420	94	759	74.932	1.049	2.25548
350	0.509	255	255	255	10.716	84.728	2.366	129.914	100	16830	118	951	105.068	0.426	5.55399
107	0.371	255	255	255	26.281	26.186	2.387	94.483	100	12240	298	310	83.66	0.282	8.46454
237	1.104	253.217	0	255	29.043	51.372	2.39	279.511	99.301	36210	318	589	17.103	1.02	2.34314
16	1.582	255	255	255	46.319	3.049	2.398	403.52	100	52275	522	21	98.427	1.494	1.60509
354	1.042	255	255	255	17.728	84.565	2.43	265.732	100	34425	189	970	40.601	1.282	1.89548
67	0.834	255	255	255	54.244	18.563	2.436	212.586	100	27540	611	224	64.359	0.98	2.48571
228	1.266	255	255	255	16.837	49.722	2.443	322.816	100	41820	177	559	127.694	1.744	1.4008
189	1.382	255	255	255	75.975	44.014	2.451	352.342	100	45645	851	503	165.466	1.706	1.43669
206	0.625	255	255	255	71.376	46.623	2.476	159.439	100	20655	804	545	62.526	0.629	3.93641
134	0.803	255	255	255	72.913	30.68	2.516	204.712	100	26520	817	341	155.225	0.965	2.60725
110	1.065	255	255	255	49.247	27.016	2.517	271.638	100	35190	556	290	119.249	1.201	2.09575
199	0.571	255	255	255	86.515	45.844	2.554	145.661	100	18870	990	508	93.945	1.104	2.31341
217	1.837	253.929	0	255	19.641	48.451	2.584	466.508	99.58	60435	211	563	35.311	1.743	1.4825
297	0.486	255	255	255	38.855	65.847	2.612	124.008	100	16065	428	744	160.346	0.325	8.03692
309	1.86	247.593	0	255	28.558	69.543	2.612	460.603	97.095	59670	319	778	132.274	1.631	1.60147
131	1.32	255	255	255	74.883	30.211	2.621	336.594	100	43605	837	334	166.43	1.884	1.39119
332	0.702	255	255	255	73.983	77.641	2.621	179.123	100	23205	828	881	166.43	0.835	3.13892
319	0.672	255	255	255	37.535	73.87	2.633	171.25	100	22185	411	848	25.71	0.6	4.38833
160	1.467	255	255	255	26.883	36.454	2.637	373.994	100	48450	295	426	60.018	1.982	1.33047
129	1.312	255	255	255	68.767	29.571	2.656	334.626	100	43350	773	351	55.784	1.646	1.61361
223	0.841	255	255	255	80.818	48.828	2.668	214.554	100	27795	906	550	162.759	0.722	3.69529
219	0.602	255	255	255	37.564	47.98	2.707	153.534	100	19890	412	549	13.134	0.428	6.32477
143	0.726	255	255	255	33.768	32.704	2.712	185.029	100	23970	378	360	114.905	0.796	3.40704
53	0.425	255	255	255	57.585	14.839	2.757	108.261	100	14025	642	174	30.651	0.498	5.53614
296	1.173	255	255	255	36.356	65.95	2.759	299.195	100	38760	401	748	170.838	1.673	1.64913
50	1.289	255	255	255	18.305	12.164	2.791	328.721	100	42585	199	153	61.821	1.061	2.63054
255	1.104	251.434	0	255	45.739	54.119	2.792	277.543	98.601	35955	507	619	12.724	1.114	2.50628
9	1.289	255	255	255	26.457	1.574	2.813	328.721	100	42585	284	14	165.53	0.978	2.87628
359	1.49	255	255	255	12.478	86.248	2.813	379.899	100	49215	128	986	14.47	1.581	1.77925
98	1.613	253.78	0	255	53.828	24.391	2.829	409.425	99.522	53040	602	289	53.842	1.278	2.21362
272	0.61	255	255	255	11.232	60.633	2.829	155.503	100	20145	117	679	126.158	0.609	4.64532
5	0.934	255	255	255	88.663	0.395	2.833	238.175	100	30855	992	2	172.875	0.496	5.71169
76	0.911	255	255	255	49.13	20.668	2.846	232.27	100	30090	560	217	98.881	1.063	2.67733
201	1.142	255	255	255	76.551	46.152	2.86	291.322	100	37740	854	522	169.38	1.37	2.08759
154	0.726	255	255	255	49.181	34.34	2.89	185.029	100	23970	544	386	160.463	0.439	6.58314
279	0.98	255	255	255	52.925	62.598	2.905	249.985	100	32385	601	695	93.468	0.527	5.51233
151	0.834	255	255	255	37.464	34.21	2.921	212.586	100	27540	406	388	173.089	0.747	3.91031
212	1.243	255	255	255	50.734	47.684	2.926	316.911	100	41055	565	555	41.348	0.9	3.25111
227	2.161	255	255	255	55.746	49.528	2.932	551.149	100	71400	621	562	8.616	2.333	1.25675
269	1.652	255	255	255	1.622	59.831	2.973	421.235	100	54570	2	676	161.03	2.143	1.38731
233	1.845	255	255	255	88.445	51.368	2.983	470.445	100	60945	999	567	103.627	1.69	1.76509
254	1.513	255	255	255	43.665	54.729	2.992	385.804	100	49980	484	631	40.236	1.705	1.75484
88	1.621	255	255	255	78.029	23.005	3.008	413.362	100	53550	888	281	83.29	2.135	1.4089
133	0.525	255	255	255	6.795	30.984	3.045	133.85	100	17340	66	341	133.831	0.373	8.16354
132	1.498	255	255	255	24.003	30.675	3.069	381.867	100	49470	254	349	13.241	1.32	2.325
304	1.212	255	255	255	53.491	67.879	3.069	309.037	100	40035	606	790	76.759	1.304	2.35353
34	1.806	255	255	255	39.553	6.17	3.105	460.603	100	59670	436	82	25.115	1.332	2.33108
42	2.269	249.796	0	255	14.431	9.882	3.106	566.896	97.959	73440	155	97	118.74	1.878	1.65389
243	0.641	255	255	255	54.804	52.944	3.106	163.376	100	21165	611	588	118.74	0.994	3.12475
80	1.567	253.744	0	255	45.356	20.956	3.109	397.615	99.507	51510	503	252	42.709	1.493	2.08238
287	1.775	255	255	255	55.299	63.949	3.12	452.729	100	58650	619	714	147.653	1.799	1.7343
155	1.636	255	255	255	67.698	36.165	3.143	417.298	100	54060	764	426	63.435	1.602	1.96192
166	1.305	255	255	255	55.402	37.649	3.143	332.658	100	43095	623	413	116.565	1.06	2.96509
213	1.212	255	255	255	13.059	48.361	3.185	309.037	100	40035	142	534	114.444	1.249	2.55004
335	0.756	255	255	255	73.615	79.358	3.24	192.902	100	24990	826	894	139.399	0.731	4.43228
248	1.374	253.567	0	255	35.193	53.822	3.252	348.405	99.438	45135	388	596	128.418	0.927	3.50809
211	1.274	255	255	255	15.342	47.454	3.261	324.784	100	42075	157	532	152.745	1.353	2.4102
273	1.567	255	255	255	36.24	61.294	3.261	399.583	100	51765	414	679	94.635	1.729	1.88606
85	0.826	255	255	255	56.187	22.298	3.27	210.618	100	27285	637	270	83.83	0.533	6.13508
358	1.204	255	255	255	72.557	86.077	3.29	307.069	100	39780	819	994	55.886	1.405	2.34164
97	0.702	255	255	255	52.075	24.665	3.367	179.123	100	23205	589	301	82.504	0.589	5.71647
71	2.733	240.593	0	255	79.246	19.708	3.417	657.442	94.35	85170	901	244	72.031	2.6	1.31423
221	0.957	255	255	255	84.874	48.417	3.417	244.08	100	31620	946	547	162.031	0.955	3.57801
17	2.74	237.761	0	255	43.404	3.325	3.499	651.537	93.239	84405	486	59	61.504	1.488	2.35148
116	1.451	255	255	255	35.037	28.524	3.534	370.057	100	47940	389	309	124.875	1.237	2.85691
14	1.822	250.678	0	255	87.9	2.522	3.542	456.666	98.305	59160	979	16	150.255	1.831	1.93446
92	1.258	255	255	255	88.012	23.861	3.542	320.847	100	41565	997	291	82.875	1.17	3.02735
336	2.161	254.089	0	255	12.376	80.474	3.662	549.18	99.643	71145	124	920	30.256	2.528	1.44858
326	1.513	255	255	255	75.689	77.11	3.691	385.804	100	49980	844	865	141.766	0.998	3.6984
62	0.803	255	255	255	1.138	18.078	3.779	204.712	100	26520	0	190	125.538	0.87	4.34368
153	1.498	255	255	255	33.67	36.214	3.815	381.867	100	49470	383	386	97.943	1.215	3.13992
284	2.941	251.654	0	255	3.325	63.5	3.858	740.114	98.688	95880	23	742	30.069	1.979	1.94947
226	2.347	255	255	255	33.642	49.208	3.879	598.39	100	77520	362	557	166.908	1.361	2.85011
262	1.899	255	255	255	40.25	57.58	3.879	484.224	100	62730	453	675	76.908	1.188	3.26515
150	1.065	255	255	255	69.144	33.926	3.891	271.638	100	35190	770	396	25.408	1.016	3.82972
362	0.965	255	255	255	76.378	87.955	3.902	246.049	100	31875	868	980	97.765	0.553	7.05606
170	1.961	242.953	0	255	26.371	38.438	3.903	476.35	95.276	61710	279	421	148.815	1.516	2.57454
52	1.752	255	255	255	55.229	13.49	3.954	446.824	100	57885	616	168	53.13	1.911	2.06907
324	1.636	245.377	0	255	81.785	75.6	3.969	401.551	96.226	52020	912	863	5.08	1.246	3.18539
180	1.69	253.836	0	255	71.684	41.67	3.978	429.109	99.543	55590	800	495	46.79	1.591	2.50031
265	2.007	255	255	255	3.138	57.768	4.007	511.781	100	66300	13	649	127.875	3.326	1.20475
339	2.524	253.44	0	255	75.392	81.99	4.13	639.726	99.388	82875	840	916	150.709	2.605	1.58541
270	1.227	255	255	255	36.645	59.414	4.136	312.974	100	40545	395	672	167.735	0.816	5.06863
302	1.961	255	255	255	11.976	66.751	4.136	499.971	100	64770	113	767	12.265	1.006	4.11133
256	2.03	253.061	0	255	57.369	56.011	4.144	513.749	99.24	66555	641	614	122.005	2.196	1.88707
45	3.458	248.17	0	255	20.209	10.585	4.351	858.218	97.321	111180	211	102	133.363	2.347	1.85386
299	2.563	255	255	255	19.95	66.764	4.432	653.505	100	84660	205	746	140.631	1.436	3.08635
142	1.644	255	255	255	31.54	32.985	4.44	419.267	100	54315	336	360	152.928	1.175	3.77872
127	2.995	250.399	0	255	32.633	30.019	4.443	749.956	98.196	97155	355	327	155.462	2.332	1.90523
147	4.114	241.604	0	255	44.295	34.441	4.774	994.036	94.747	128775	479	391	173.66	2.475	1.92889
242	2.987	255	255	255	52.331	53.484	4.832	761.766	100	98685	576	588	126.87	2.436	1.98358
122	2.092	255	255	255	26.308	30.8	4.839	533.433	100	69105	302	315	93.122	1.563	3.09597
135	3.35	255	255	255	36.558	31.389	4.839	854.281	100	110670	394	367	15.803	2.112	2.29119
80	0.208	255	255	255	85.856	20.827	0.589	53.146	100	6885	976	234	116.565	0.527	1.11765
50	0.232	255	255	255	72.059	13.003	0.634	59.052	100	7650	818	145	123.69	0.527	1.20304
82	0.239	255	255	255	84.513	22.575	0.634	61.02	100	7905	960	254	123.69	0.527	1.20304
60	0.216	255	255	255	81.266	15.225	0.64	55.115	100	7140	924	170	105.945	0.527	1.21442
113	0.201	255	255	255	56.429	33.616	0.64	51.178	100	6630	641	379	105.945	0.439	1.45786
78	0.224	255	255	255	85.337	20.254	0.669	57.083	100	7395	970	234	66.801	0.497	1.34608
241	0.239	255	255	255	49.069	59.085	0.669	61.02	100	7905	555	671	156.801	0.439	1.52392
43	0.27	255	255	255	53.6	10.479	0.686	68.894	100	8925	608	116	129.806	0.527	1.30171
166	0.255	255	255	255	21.122	43.55	0.686	64.957	100	8415	238	499	39.806	0.527	1.30171
223	0.247	255	255	255	6.378	56.062	0.686	62.988	100	8160	70	635	129.806	0.559	1.22719
267	0.239	255	255	255	46.569	65.244	0.686	61.02	100	7905	527	740	129.806	0.527	1.30171
277	0.208	255	255	255	85.397	68.268	0.686	53.146	100	6885	969	780	39.806	0.497	1.38028
31	0.309	255	255	255	72.71	6.264	0.708	78.736	100	10200	825	68	119.745	0.615	1.15122
61	0.286	255	255	255	89.301	15.547	0.708	72.83	100	9435	1013	179	29.745	0.527	1.34345
76	0.201	255	255	255	58.514	19.9	0.708	51.178	100	6630	664	223	119.745	0.351	2.01709
130	0.293	255	255	255	4.416	37.083	0.708	74.799	100	9690	49	418	119.745	0.615	1.15122
214	0.239	255	255	255	0.548	54.601	0.708	61.02	100	7905	4	625	60.255	0.527	1.34345
53	0.201	255	255	255	81.019	13.655	0.725	51.178	100	6630	918	154	165.964	0.439	1.65148
269	0.247	255	255	255	48.611	66.073	0.725	62.988	100	8160	553	756	75.964	0.527	1.37571
171	0.208	255	255	255	44.81	44.816	0.746	53.146	100	6885	507	513	45	0.471	1.58386
260	0.27	255	255	255	46.117	63.521	0.746	68.894	100	8925	522	720	135	0.527	1.41556
92	0.278	255	255	255	82.878	26.123	0.751	70.862	100	9180	939	299	20.556	0.527	1.42505
265	0.293	255	255	255	41.019	65.217	0.751	74.799	100	9690	466	738	110.556	0.527	1.42505
15	0.216	255	255	255	9.762	2.432	0.756	55.115	100	7140	108	31	35.538	0.463	1.63283
39	0.309	255	255	255	8.564	9.438	0.756	78.736	100	10200	94	110	35.538	0.615	1.22927
62	0.239	255	255	255	69.333	15.728	0.756	61.02	100	7905	786	182	35.538	0.497	1.52113
301	0.216	255	255	255	25.476	76.001	0.756	55.115	100	7140	287	868	35.538	0.571	1.32399
318	0.278	255	255	255	28.644	80.752	0.756	70.862	100	9180	323	916	144.462	0.527	1.43454
330	0.232	255	255	255	9.518	85.191	0.756	59.052	100	7650	106	966	125.538	0.527	1.43454
333	0.34	255	255	255	32.037	86.807	0.756	86.609	100	11220	363	984	125.538	0.615	1.22927
71	0.301	255	255	255	28.409	18.24	0.786	76.767	100	9945	319	209	26.565	0.589	1.33447
191	0.316	255	255	255	26.348	49.796	0.786	80.704	100	10455	298	571	63.435	0.527	1.49146
209	0.309	255	255	255	77.542	53.6	0.786	78.736	100	10200	881	606	116.565	0.589	1.33447
250	0.371	228.438	0	255	1.823	60.914	0.786	84.641	89.583	10965	17	691	153.435	0.703	1.11807
256	0.371	255	255	255	53.607	61.853	0.786	94.483	100	12240	608	700	116.565	0.703	1.11807
274	0.363	255	255	255	39.911	66.604	0.786	92.514	100	11985	452	754	116.565	0.615	1.27805
168	0.316	255	255	255	42.902	44.008	0.829	80.704	100	10455	485	504	32.005	0.615	1.34797
146	0.201	255	255	255	89.014	39.918	0.834	51.178	100	6630	1009	456	18.435	0.471	1.7707
169	0.363	255	255	255	13.382	44.312	0.834	92.514	100	11985	151	509	71.565	0.615	1.3561
7	0.208	255	255	255	18.53	1.316	0.865	53.146	100	6885	207	17	23.962	0.439	1.97039
114	0.278	255	255	255	63.546	33.992	0.865	70.862	100	9180	718	385	156.038	0.527	1.64137
154	0.44	255	255	255	20.392	41.607	0.865	112.198	100	14535	230	469	113.962	0.703	1.23044
181	0.432	255	255	255	47.015	46.433	0.865	110.23	100	14280	533	533	66.038	0.703	1.23044
182	0.201	255	255	255	82.391	46.778	0.865	51.178	100	6630	936	537	66.038	0.361	2.39612
192	0.201	255	255	255	46.305	49.951	0.865	51.178	100	6630	524	573	66.038	0.584	1.48116
197	0.363	255	255	255	53.709	50.621	0.865	92.514	100	11985	607	578	23.962	0.615	1.4065
160	0.224	255	255	255	30.158	42.268	0.879	57.083	100	7395	340	477	126.87	0.373	2.35657
219	0.455	255	255	255	32.235	55.261	0.879	116.135	100	15045	363	632	36.87	0.703	1.25036
240	0.324	255	255	255	36.834	58.761	0.879	82.672	100	10710	415	672	36.87	0.589	1.49236
247	0.247	255	255	255	72.055	59.887	0.879	62.988	100	8160	817	686	53.13	0.435	2.02069
253	0.255	255	255	255	66.311	61.316	0.879	64.957	100	8415	752	702	53.13	0.435	2.02069
283	0.363	255	255	255	24.749	70.705	0.879	92.514	100	11985	279	800	126.87	0.667	1.31784
120	0.34	255	255	255	30.455	35.11	0.905	86.609	100	11220	342	402	29.055	0.55	1.64545
167	0.224	255	255	255	87.991	43.885	0.905	57.083	100	7395	999	504	60.945	0.389	2.32648
183	0.262	255	255	255	83.218	46.666	0.905	66.925	100	8670	943	534	29.055	0.471	1.92144
280	0.378	255	255	255	21.776	69.189	0.905	96.451	100	12495	244	791	29.055	0.72	1.25694
52	0.239	255	255	255	31.772	13.155	0.917	61.02	100	7905	357	151	16.699	0.351	2.61254
329	0.255	255	255	255	13.513	84.277	0.917	64.957	100	8415	152	955	106.699	0.439	2.08884
38	0.239	255	255	255	88.095	8.189	0.934	61.02	100	7905	1000	97	48.814	0.549	1.70128
108	0.216	255	255	255	89.666	32.818	0.934	55.115	100	7140	1017	377	48.814	0.373	2.50402
303	0.201	255	255	255	57.757	76.626	0.934	51.178	100	6630	654	876	48.814	0.373	2.50402
73	0.293	255	255	255	81.688	19.419	0.946	74.799	100	9690	928	216	111.801	0.49	1.93061
148	0.278	255	255	255	52.542	40.127	0.946	70.862	100	9180	593	458	21.801	0.527	1.79507
155	0.255	255	255	255	25.922	41.819	0.946	64.957	100	8415	293	481	68.199	0.405	2.3358
229	0.208	255	255	255	37.413	56.534	0.946	53.146	100	6885	421	646	21.801	0.362	2.61326
335	0.224	255	255	255	23.929	88.327	0.946	57.083	100	7395	271	1010	68.199	0.392	2.41327
225	0.262	255	255	255	26.332	56.232	0.95	66.925	100	8670	295	643	33.69	0.467	2.03426
302	0.286	255	255	255	73.902	76.215	0.95	72.83	100	9435	837	871	33.69	0.489	1.94274
321	0.355	255	255	255	11.632	81.038	0.95	90.546	100	11730	128	926	33.69	0.615	1.54472
58	0.401	255	255	255	32.707	15.024	0.982	102.356	100	13260	367	170	169.695	0.527	1.86338
74	0.232	255	255	255	24.369	19.417	0.982	59.052	100	7650	272	223	26.565	0.389	2.52442
282	0.378	255	255	255	77.15	70.266	0.982	96.451	100	12495	876	805	63.435	0.653	1.50383
95	0.262	255	255	255	82.595	27.962	0.994	66.925	100	8670	936	314	135	0.435	2.28506
270	0.286	255	255	255	61.172	66.071	0.994	72.83	100	9435	692	756	45	0.435	2.28506
16	0.208	255	255	255	63.26	2.794	1.002	53.146	100	6885	717	37	52.125	0.36	2.78333
49	0.417	255	255	255	85.521	12.613	1.002	106.293	100	13770	971	139	127.875	0.703	1.42532
220	0.201	245.192	0	255	28.324	55.554	1.002	49.21	96.154	6375	321	638	74.745	0.264	3.79545
291	0.208	255	255	255	65.164	74.021	1.002	53.146	100	6885	737	846	37.875	0.341	2.93842
293	0.232	255	255	255	64.357	74.34	1.002	59.052	100	7650	730	840	105.255	0.491	2.04073
309	0.316	255	255	255	78.504	78.523	1.002	80.704	100	10455	889	890	142.125	0.55	1.82182
90	0.371	255	255	255	37.23	25.96	1.025	94.483	100	12240	419	299	30.964	0.55	1.86364
195	0.239	255	255	255	47.335	50.449	1.025	61.02	100	7905	535	580	59.036	0.505	2.0297
266	0.286	255	255	255	82.916	65.306	1.025	72.83	100	9435	941	748	59.036	0.432	2.37269
334	0.301	255	255	255	26.395	88.338	1.028	76.767	100	9945	300	1010	70.017	0.72	1.42778
119	0.208	255	255	255	22.269	34.52	1.058	53.146	100	6885	249	389	138.366	0.311	3.40193
314	0.278	255	255	255	58.167	79.988	1.058	70.862	100	9180	657	914	41.634	0.435	2.43218
285	0.208	255	255	255	64.181	72.384	1.062	53.146	100	6885	729	830	65.556	0.432	2.45833
1	0.332	255	255	255	10.266	0.291	1.072	84.641	100	10965	112	7	34.992	0.56	1.91429
6	0.363	255	255	255	19.599	1.218	1.087	92.514	100	11985	222	8	104.036	0.615	1.76748
284	0.316	248.78	0	255	25.18	71.458	1.087	78.736	97.561	10200	286	819	75.964	0.496	2.19153
127	0.224	255	255	255	44.325	36.602	1.101	57.083	100	7395	502	411	118.61	0.36	3.05833
9	0.293	255	255	255	22.09	2.159	1.111	74.799	100	9690	251	17	108.435	0.861	1.29036
51	0.309	255	255	255	65.56	13.135	1.111	78.736	100	10200	740	151	18.435	0.439	2.53075
123	0.394	255	255	255	25.225	35.982	1.111	100.388	100	13005	281	407	161.565	0.577	1.92548
233	0.27	255	255	255	0.538	57.318	1.111	68.894	100	8925	1	651	161.565	0.414	2.68357
179	0.232	255	255	255	28.624	46.032	1.118	59.052	100	7650	322	529	45	0.621	1.80032
288	0.224	255	255	255	66.011	73.127	1.125	57.083	100	7395	747	836	38.66	0.381	2.95276
13	0.409	255	255	255	87.057	2.237	1.142	104.325	100	13515	988	20	112.62	0.615	1.85691
276	0.27	255	255	255	50.133	68.501	1.142	68.894	100	8925	569	773	112.62	0.417	2.73861
36	0.232	255	255	255	87.007	7.875	1.146	59.052	100	7650	985	93	32.471	0.347	3.30259
161	0.278	255	255	255	59.017	42.651	1.146	70.862	100	9180	666	489	32.471	0.392	2.92347
264	0.672	255	255	255	65.551	65.193	1.146	171.25	100	22185	742	747	57.529	0.825	1.38909
91	0.309	255	255	255	41.964	26.417	1.156	78.736	100	10200	477	294	98.746	0.519	2.22736
178	0.255	255	255	255	56.556	45.68	1.156	64.957	100	8415	638	519	171.254	0.35	3.30286
48	0.394	255	255	255	82.232	12.33	1.172	100.388	100	13005	930	138	167.005	0.491	2.38697
147	0.44	255	255	255	18.001	40.231	1.172	112.198	100	14535	202	453	102.995	0.703	1.66714
308	0.239	255	255	255	45.994	78.76	1.172	61.02	100	7905	522	890	102.995	0.345	3.3971
23	0.216	255	255	255	82.358	4.54	1.179	55.115	100	7140	934	57	63.435	0.354	3.33051
98	0.371	255	255	255	75.839	28.356	1.179	94.483	100	12240	857	321	153.435	0.634	1.85962
[truncated: 510 more rows]

## Sheet: Size
Range	Frequency
0.5–1	457
1–1.5	760
1.5–2	516
2–2.5	308
2.5–3	180
2.5–3.5	117
3.5–4	64
4–4.5	50
4.5–5	34
5–5.5	20
>5.5	3
Total WPBs	2509

## Sheet: Aspect
Ratio	Frequency
1–1.5	349
1.5–2	423
2–2.5	426
2.5–3	383
3–3.5	280
3.5–4	214
4–4.5	145
4.5–5	95
5–5.5	74
5.5–6	55
>6	65
