# Supplementary material for: V-ATPase V0a1 promotes Weibel–Palade body biogenesis through the regulation of membrane fission
Source: eLife journal article supplement (doi:10.7554/elife.71526), 2021-12-14
Supplement: fig3-figsupp3-data1 [file Fig3-figure supplement 3_Feret_percent.xlsx]

## Sheet: Feret diameter
Feret diameter
Ratio	shControl	shV0a2	shV0a1
0.5–1	18.2144	20.3175	46.3327
1–1.5	30.291	32.5	32.5581
1.5–2	20.566	19.8016	10.7335
2–2.5	12.2758	10.119	4.74061
2.5–3	7.17417	6.38889	2.50447
2.5–3.5	4.66321	4.3254	1.07335
3.5–4	2.55082	2.5	0.894454
4–4.5	1.99283	2.14286	0.715564
4.5–5	1.35512	0.833333	0.268336
5–5.5	0.79713	0.873016	0.178891
>5.5	0.11957	0.198413	0
Total	100	100	100

## Sheet: Fmax Fmin
Fmax Fmin
Ratio	shControl	shV0a2	shV0a1
1–1.5	13.9099	18.0952	41.1449
1.5–2	16.8593	24.8016	28.8014
2–2.5	16.9789	20.0397	14.0429
2.5–3	15.265	13.4524	7.15564
3–3.5	11.1598	9.56349	3.84615
3.5–4	8.52929	6.30952	2.23614
4–4.5	5.77919	3.33333	1.34168
4.5–5	3.78637	2.10317	0.715564
5–5.5	2.94938	0.992063	0.357782
5.5–6	2.19211	0.714286	0.0894454
>6	2.59067	0.595238	0.268336
Total	100	100	100
