# Supplementary material for: V-ATPase V0a1 promotes Weibel–Palade body biogenesis through the regulation of membrane fission
Source: eLife journal article supplement (doi:10.7554/elife.71526), 2021-12-14
Supplement: fig3-figsupp3-data1 [file Fig3-figure supplement 3_Feret_shV0a1.xlsx]

## Sheet: shV0a1
	Area	Mean	Min	Max	X	Y	Feret	IntDen	%Area	RawIntDen	FeretX	FeretY	FeretAngle	MinFeret	Max/Min		Range
36	0.201	255	255	255	27.838	32.846	0.589	51.178	100	6630	315	371	116.565	0.497	1.18511		0
58	0.201	255	255	255	28.791	41.213	0.589	51.178	100	6630	326	466	116.565	0.527	1.11765		0.5
71	0.201	255	255	255	28.466	54.341	0.589	51.178	100	6630	321	617	153.435	0.439	1.34169		1
57	0.232	255	255	255	18.374	40.579	0.634	59.052	100	7650	207	459	123.69	0.527	1.20304		1.5
49	0.239	255	255	255	19.396	37.528	0.64	61.02	100	7905	217	427	164.055	0.527	1.21442		2
102	0.208	255	255	255	24.804	83.311	0.64	53.146	100	6885	279	947	164.055	0.527	1.21442		2.5
44	0.239	255	255	255	44.722	35.494	0.669	61.02	100	7905	506	406	23.199	0.527	1.26945		3
60	0.247	255	255	255	27.179	42.798	0.669	62.988	100	8160	306	489	23.199	0.527	1.26945		3.5
68	0.255	255	255	255	39.993	52.927	0.669	64.957	100	8415	454	606	66.801	0.527	1.26945		4
18	0.232	255	255	255	69.558	15.633	0.686	59.052	100	7650	789	181	39.806	0.527	1.30171		4.5
53	0.201	255	255	255	24.749	39.266	0.686	51.178	100	6630	279	444	129.806	0.497	1.38028		5
25	0.239	238.548	0	255	75.214	20.274	0.708	57.083	93.548	7395	854	227	119.745	0.527	1.34345		5.5
97	0.224	255	255	255	31.994	79.023	0.708	57.083	100	7395	363	896	119.745	0.527	1.34345
108	0.201	255	255	255	5.559	85.983	0.708	51.178	100	6630	61	982	60.255	0.439	1.61276
38	0.34	255	255	255	25.523	33.826	0.751	86.609	100	11220	289	381	110.556	0.615	1.22114
63	0.247	255	255	255	22.459	44.651	0.751	62.988	100	8160	254	504	110.556	0.527	1.42505
77	0.332	255	255	255	30.304	73.408	0.751	84.641	100	10965	341	834	159.444	0.615	1.22114
21	0.224	255	255	255	70.225	18.022	0.756	57.083	100	7395	796	203	144.462	0.5	1.512
76	0.278	255	255	255	26.463	72.786	0.756	70.862	100	9180	299	824	125.538	0.615	1.22927
78	0.278	255	255	255	16.627	73.728	0.756	70.862	100	9180	186	836	125.538	0.527	1.43454
101	0.216	255	255	255	4.867	82.594	0.756	55.115	100	7140	53	944	54.462	0.497	1.52113
111	0.239	255	255	255	20.181	87.203	0.756	61.02	100	7905	227	989	125.538	0.497	1.52113
11	0.34	255	255	255	68.598	8.532	0.786	86.609	100	11220	779	93	116.565	0.668	1.17665
16	0.262	255	255	255	65.739	12.564	0.786	66.925	100	8670	744	140	153.435	0.597	1.31658
87	0.309	255	255	255	29.784	75.822	0.786	78.736	100	10200	337	859	116.565	0.527	1.49146
92	0.201	255	255	255	29.48	78.154	0.786	51.178	100	6630	331	888	153.435	0.465	1.69032
104	0.278	255	255	255	7.509	83.761	0.786	70.862	100	9180	83	957	63.435	0.609	1.29064
32	0.371	255	255	255	20.195	31.069	0.81	94.483	100	12240	226	351	139.399	0.615	1.31707
52	0.355	255	255	255	16.655	39.21	0.81	90.546	100	11730	185	445	167.471	0.615	1.31707
88	0.262	255	255	255	23.159	75.758	0.81	66.925	100	8670	259	863	12.529	0.527	1.537
93	0.247	255	255	255	25.482	78.422	0.81	62.988	100	8160	287	889	130.601	0.55	1.47273
106	0.286	255	255	255	29.959	85.044	0.81	72.83	100	9435	337	965	139.399	0.589	1.37521
12	0.247	255	255	255	69.829	9.675	0.829	62.988	100	8160	791	107	147.995	0.527	1.57306
22	0.239	255	255	255	81.877	18.08	0.829	61.02	100	7905	928	208	32.005	0.49	1.69184
34	0.201	255	255	255	32.525	32.204	0.829	51.178	100	6630	368	362	122.005	0.417	1.98801
91	0.255	255	255	255	7.445	77.432	0.829	64.957	100	8415	82	877	122.005	0.497	1.66801
107	0.363	255	255	255	26.628	85.833	0.829	92.514	100	11985	299	979	32.005	0.667	1.24288
14	0.371	255	255	255	72.264	11.034	0.834	94.483	100	12240	821	130	71.565	0.615	1.3561
86	0.247	255	255	255	17.687	75.734	0.834	62.988	100	8160	197	861	161.565	0.439	1.89977
90	0.425	255	255	255	26.865	77.235	0.865	108.261	100	14025	301	881	23.962	0.703	1.23044
1	0.301	255	255	255	79.824	0.348	0.879	76.767	100	9945	906	8	53.13	0.536	1.63993
27	0.332	255	255	255	76.645	23.441	0.879	84.641	100	10965	869	271	53.13	0.604	1.4553
42	0.262	255	255	255	21.476	34.916	0.879	66.925	100	8670	241	394	143.13	0.497	1.76861
50	0.371	255	255	255	19.292	38.396	0.879	94.483	100	12240	215	439	36.87	0.621	1.41546
70	0.448	255	255	255	25.72	54.376	0.879	114.167	100	14790	289	622	36.87	0.703	1.25036
72	0.363	255	255	255	31.524	55.442	0.879	92.514	100	11985	356	627	126.87	0.621	1.41546
56	0.262	255	255	255	12.445	40.089	0.896	66.925	100	8670	137	455	168.69	0.439	2.041
103	0.316	255	255	255	23.879	83.503	0.905	80.704	100	10455	267	953	29.055	0.527	1.71727
98	0.533	255	255	255	37.483	81.458	0.946	135.819	100	17595	425	922	111.801	0.791	1.19595
105	0.286	255	255	255	32.376	84.64	0.946	72.83	100	9435	367	969	68.199	0.527	1.79507
110	0.371	255	255	255	20.989	86.861	0.946	94.483	100	12240	234	991	21.801	0.527	1.79507
100	0.255	255	255	255	5.789	82.016	0.982	64.957	100	8415	61	933	169.695	0.439	2.2369
4	0.571	255	255	255	72.954	1.193	1.002	145.661	100	18870	827	9	127.875	0.791	1.26675
35	0.224	255	255	255	20.382	32.343	1.002	57.083	100	7395	227	365	142.125	0.435	2.30345
46	0.625	255	255	255	34.562	36.104	1.002	159.439	100	20655	393	405	105.255	0.879	1.13993
109	0.463	255	255	255	35.964	86.296	1.002	118.103	100	15300	404	980	164.745	0.615	1.62927
13	0.309	255	255	255	66.979	9.851	1.028	78.736	100	10200	757	114	19.983	0.465	2.21075
19	0.448	255	255	255	71.558	16.577	1.028	114.167	100	14790	812	194	70.017	0.615	1.67154
61	0.455	255	255	255	20.299	43.534	1.028	116.135	100	15045	229	490	109.983	0.527	1.95066
39	0.502	255	255	255	26.827	33.945	1.062	127.945	100	16575	303	392	65.556	0.682	1.55718
79	0.401	255	255	255	34.579	74.256	1.062	102.356	100	13260	392	851	65.556	0.571	1.85989
3	0.255	255	255	255	66.119	1.008	1.072	64.957	100	8415	747	9	145.008	0.494	2.17004
30	0.378	255	255	255	80.908	29.38	1.072	96.451	100	12495	916	330	145.008	0.629	1.70429
83	0.517	255	255	255	36.849	75.256	1.072	131.882	100	17085	415	853	145.008	0.761	1.40867
89	0.363	255	255	255	25.96	76.812	1.072	92.514	100	11985	290	878	34.992	0.596	1.79866
26	0.278	255	255	255	75.437	23.334	1.087	70.862	100	9180	853	269	14.036	0.586	1.85495
94	0.471	255	255	255	30.612	78.544	1.111	120.072	100	15555	343	897	18.435	0.699	1.58941
7	0.54	255	255	255	68.023	2.597	1.142	137.787	100	17850	772	36	67.38	0.615	1.85691
43	0.409	255	255	255	36.759	35.678	1.146	104.325	100	13515	415	412	57.529	0.535	2.14206
29	0.316	255	255	255	27.449	29.309	1.156	80.704	100	10455	311	340	81.254	0.439	2.63326
64	0.548	255	255	255	23.803	47.687	1.156	139.756	100	18105	270	537	98.746	0.703	1.64438
67	0.872	255	255	255	27.68	53.116	1.182	222.428	100	28815	310	609	41.987	1.054	1.12144
8	0.641	255	255	255	69.12	2.638	1.195	163.376	100	21165	784	24	126.027	0.853	1.40094
24	0.594	255	255	255	66.463	20.18	1.195	151.566	100	19635	754	224	107.103	0.786	1.52036
55	0.625	255	255	255	21.551	40.044	1.195	159.439	100	20655	242	450	126.027	0.747	1.59973
95	0.27	255	255	255	9.156	78.622	1.195	68.894	100	8925	99	899	36.027	0.414	2.88647
66	0.301	255	255	255	22.777	51.092	1.224	76.767	100	9945	254	579	158.962	0.438	2.79452
74	0.571	255	255	255	54.844	69.953	1.249	145.661	100	18870	620	801	50.711	0.766	1.63055
23	0.702	255	255	255	73.775	19.521	1.306	179.123	100	23205	834	218	132.274	0.904	1.44469
80	0.255	255	255	255	15.528	74.601	1.306	64.957	100	8415	173	842	109.654	0.481	2.71518
17	0.471	255	255	255	66.435	12.758	1.372	120.072	100	15555	750	151	39.806	0.559	2.45438
41	0.355	255	255	255	27.683	34.704	1.375	90.546	100	11730	312	402	63.435	0.432	3.18287
10	0.494	255	255	255	65.073	8.45	1.419	125.977	100	16320	732	99	21.801	0.607	2.33773
99	1.158	255	255	255	28.286	82.286	1.43	295.258	100	38250	313	936	169.38	1.243	1.15044
96	0.849	255	255	255	28.073	79.19	1.494	216.523	100	28050	311	904	28.072	0.907	1.64719
112	0.394	255	255	255	22.157	88.761	1.557	100.388	100	13005	244	1013	16.39	0.403	3.86352
20	1.011	253.053	0	255	73.528	18.18	1.584	255.891	99.237	33150	830	203	160.56	1.031	1.53637
75	0.78	255	255	255	19.603	71.339	1.584	198.807	100	25755	222	803	109.44	0.881	1.79796
28	0.494	255	255	255	74.723	25.744	1.634	125.977	100	16320	844	299	53.746	0.658	2.48328
69	0.517	255	255	255	29.512	54.547	1.688	131.882	100	17085	328	615	141.34	0.457	3.69365
73	0.602	255	255	255	35.832	56.891	1.726	153.534	100	19890	399	650	14.744	0.49	3.52245
65	1.05	255	255	255	20.953	49.746	1.731	267.701	100	34680	230	570	23.962	0.924	1.87338
54	1.058	255	255	255	26.585	39.7	1.779	269.669	100	34935	291	456	20.225	1.123	1.58415
51	0.641	255	255	255	29.922	39.368	1.941	163.376	100	21165	342	458	84.806	0.791	2.45386
81	0.479	255	255	255	17.784	74.517	1.982	122.04	100	15810	191	846	167.196	0.493	4.02028
31	0.455	255	255	255	35.463	31.043	2.003	116.135	100	15045	395	360	37.875	0.39	5.1359
40	0.625	255	255	255	41.527	34.007	2.003	159.439	100	20655	464	381	142.125	0.536	3.73694
48	1.451	255	255	255	40.37	37.608	2.003	370.057	100	47940	453	420	127.875	1.15	1.74174
62	0.973	255	255	255	24.502	44.811	2.023	248.017	100	32130	272	519	55.62	0.853	2.37163
15	1.258	255	255	255	71.066	12.293	2.059	320.847	100	41565	799	147	50.194	1.562	1.31818
82	1.189	255	255	255	24.268	75.949	2.643	303.132	100	39270	272	878	68.552	1.087	2.43146
47	0.641	255	255	255	27.285	37.798	2.833	163.376	100	21165	309	414	97.125	0.581	4.87608
59	1.305	255	255	255	17.811	43.417	3.24	332.658	100	43095	198	476	102.529	0.648	5
84	1.513	253.699	0	255	20.915	75.523	3.27	383.836	99.49	49725	221	856	173.83	0.974	3.35729
6	2.223	255	255	255	72.24	2.923	3.29	566.896	100	73440	808	25	145.886	1.967	1.6726
2	1.513	255	255	255	83.296	1.414	3.679	385.804	100	49980	933	4	139.844	1.142	3.22154
85	1.961	255	255	255	15.114	76.19	3.947	499.971	100	64770	151	875	16.821	0.889	4.43982
45	2.185	255	255	255	24.584	37.212	4.05	557.054	100	72165	262	440	40.601	1.55	2.6129
5	2.408	255	255	255	75.694	1.858	4.313	614.137	100	79560	848	36	33.366	1.615	2.67059
39	0.208	255	255	255	71.174	21.407	0.634	53.146	100	6885	807	245	33.69	0.511	1.2407
120	0.216	255	255	255	24.415	60.243	0.634	55.115	100	7140	275	688	33.69	0.527	1.20304
123	0.201	255	255	255	84.098	61.548	0.634	51.178	100	6630	954	699	146.31	0.439	1.44419
186	0.232	255	255	255	32.08	89.429	0.634	59.052	100	7650	363	1015	123.69	0.527	1.20304
135	0.216	255	255	255	25.692	70.143	0.64	55.115	100	7140	289	797	164.055	0.439	1.45786
85	0.201	255	255	255	23.942	50.772	0.669	51.178	100	6630	269	576	156.801	0.351	1.90598
115	0.216	255	255	255	23.847	58.727	0.669	55.115	100	7140	268	670	23.199	0.439	1.52392
117	0.247	255	255	255	6.707	59.206	0.669	62.988	100	8160	73	672	156.801	0.527	1.26945
125	0.278	255	255	255	22.895	63.3	0.669	70.862	100	9180	259	717	113.199	0.615	1.0878
103	0.216	255	255	255	15.623	55.169	0.686	55.115	100	7140	175	625	129.806	0.497	1.38028
43	0.301	255	255	255	53.651	22.164	0.708	76.767	100	9945	608	249	119.745	0.615	1.15122
86	0.27	255	255	255	17.874	51.303	0.708	68.894	100	8925	200	586	29.745	0.527	1.34345
138	0.278	255	255	255	79.744	71.351	0.708	70.862	100	9180	904	814	29.745	0.527	1.34345
168	0.27	255	255	255	24.928	81.165	0.708	68.894	100	8925	280	922	150.255	0.527	1.34345
169	0.27	255	255	255	81.113	81.318	0.708	68.894	100	8925	920	928	29.745	0.559	1.26655
28	0.232	255	255	255	59.097	20.319	0.746	59.052	100	7650	670	228	135	0.536	1.39179
54	0.301	255	255	255	56.42	28.172	0.751	76.767	100	9945	640	317	110.556	0.615	1.22114
56	0.27	255	255	255	68.84	29.687	0.751	68.894	100	8925	782	334	110.556	0.439	1.71071
155	0.316	255	255	255	13.602	77.525	0.751	80.704	100	10455	154	878	110.556	0.615	1.22114
163	0.293	255	255	255	14.927	79.878	0.751	74.799	100	9690	168	913	69.444	0.527	1.42505
90	0.247	255	255	255	25.147	52.125	0.756	62.988	100	8160	283	596	35.538	0.497	1.52113
129	0.286	255	255	255	33.594	66.472	0.756	72.83	100	9435	380	753	125.538	0.609	1.24138
154	0.293	255	255	255	85.024	76.784	0.756	74.799	100	9690	964	876	35.538	0.615	1.22927
184	0.278	255	255	255	12.437	88.083	0.756	70.862	100	9180	138	1005	35.538	0.559	1.35242
3	0.239	255	255	255	72.185	12.84	0.786	61.02	100	7905	819	150	63.435	0.497	1.58149
18	0.347	255	255	255	53.954	18.158	0.786	88.577	100	11475	610	205	153.435	0.615	1.27805
42	0.255	255	255	255	43.731	22.006	0.786	64.957	100	8415	496	246	116.565	0.497	1.58149
72	0.27	255	255	255	66.141	41.466	0.786	68.894	100	8925	751	476	63.435	0.527	1.49146
76	0.255	255	255	255	55.672	45.432	0.786	64.957	100	8415	631	513	116.565	0.527	1.49146
111	0.316	255	255	255	13.921	57.12	0.786	80.704	100	10455	156	654	63.435	0.611	1.28642
116	0.301	255	255	255	39.188	58.86	0.786	76.767	100	9945	442	668	153.435	0.527	1.49146
158	0.332	255	255	255	79.534	78.279	0.786	84.641	100	10965	903	895	63.435	0.615	1.27805
173	0.262	255	255	255	60.553	82.081	0.786	66.925	100	8670	685	933	153.435	0.527	1.49146
96	0.386	255	255	255	10.29	54.237	0.81	98.419	100	12750	114	614	130.601	0.703	1.1522
106	0.262	255	255	255	37.454	56.284	0.81	66.925	100	8670	423	644	40.601	0.55	1.47273
124	0.34	255	255	255	82.717	62.591	0.81	86.609	100	11220	940	708	102.529	0.615	1.31707
143	0.386	255	255	255	8.292	72.44	0.81	98.419	100	12750	93	820	102.529	0.703	1.1522
180	0.278	255	255	255	12.007	84.823	0.81	70.862	100	9180	134	969	49.399	0.583	1.38937
63	0.401	250.096	0	255	70.108	35.468	0.829	100.388	98.077	13005	795	400	122.005	0.703	1.17923
75	0.262	255	255	255	58.372	44.454	0.829	66.925	100	8670	660	508	32.005	0.5	1.658
83	0.208	255	255	255	29.373	49.414	0.829	53.146	100	6885	332	567	57.995	0.435	1.90575
113	0.293	255	255	255	3.621	58.313	0.829	74.799	100	9690	38	660	122.005	0.55	1.50727
147	0.363	255	255	255	7.899	73.425	0.829	92.514	100	11985	86	838	32.005	0.683	1.21376
162	0.262	255	255	255	88.551	79.6	0.829	66.925	100	8670	1004	909	32.005	0.497	1.66801
179	0.355	255	255	255	10.938	84.849	0.829	90.546	100	11730	122	962	122.005	0.667	1.24288
1	0.239	255	255	255	38.648	8.617	0.834	61.02	100	7905	436	100	18.435	0.439	1.89977
152	0.355	255	255	255	80.414	75.925	0.834	90.546	100	11730	914	869	71.565	0.615	1.3561
161	0.278	255	255	255	6.052	79.373	0.834	70.862	100	9180	68	899	108.435	0.517	1.61315
14	0.224	255	255	255	15.513	17.525	0.865	57.083	100	7395	172	202	23.962	0.39	2.21795
121	0.417	255	255	255	35.132	60.405	0.865	106.293	100	13770	398	692	66.038	0.703	1.23044
165	0.409	255	255	255	85.756	80.31	0.865	104.325	100	13515	972	911	156.038	0.703	1.23044
2	0.371	255	255	255	35.457	12.077	0.87	94.483	100	12240	400	134	135	0.615	1.41463
131	0.293	255	255	255	71.408	67.432	0.87	74.799	100	9690	809	764	135	0.559	1.55635
166	0.278	255	255	255	12.905	80.454	0.87	70.862	100	9180	143	919	45	0.563	1.54529
6	0.401	255	255	255	18.795	14.831	0.879	102.356	100	13260	211	173	53.13	0.683	1.28697
19	0.355	255	255	255	73.286	18.758	0.879	90.546	100	11730	831	217	53.13	0.527	1.66793
23	0.239	255	255	255	64.654	19.398	0.879	61.02	100	7905	733	217	126.87	0.494	1.77935
57	0.471	246.639	0	255	70.05	29.864	0.879	116.135	96.721	15045	794	344	53.13	0.791	1.11125
128	0.386	255	255	255	27.922	66.073	0.879	98.419	100	12750	314	748	126.87	0.695	1.26475
141	0.324	255	255	255	83.826	72.304	0.879	82.672	100	10710	950	827	36.87	0.653	1.34609
145	0.417	255	255	255	27.316	72.477	0.879	106.293	100	13770	307	828	36.87	0.695	1.26475
182	0.355	255	255	255	6.725	86.203	0.879	90.546	100	11730	74	977	126.87	0.615	1.42927
171	0.455	255	255	255	79.239	81.534	0.896	116.135	100	15045	897	929	11.31	0.703	1.27454
44	0.394	255	255	255	73.737	22.384	0.905	100.388	100	13005	836	259	60.945	0.621	1.45733
47	0.247	255	255	255	70.77	22.769	0.905	62.988	100	8160	804	264	60.945	0.497	1.82093
51	0.448	255	255	255	34.747	26.653	0.905	114.167	100	14790	393	308	60.945	0.703	1.28734
127	0.355	255	255	255	82.795	65.862	0.905	90.546	100	11730	938	747	150.945	0.55	1.64545
170	0.486	255	255	255	16.828	81.496	0.905	124.008	100	16065	187	930	29.055	0.791	1.14412
74	0.363	255	255	255	57.599	43.218	0.917	92.514	100	11985	654	487	106.699	0.609	1.50575
80	0.309	255	255	255	23.968	47.301	0.917	78.736	100	10200	268	537	163.301	0.439	2.08884
156	0.309	255	255	255	4.804	77.997	0.917	78.736	100	10200	54	883	106.699	0.615	1.49106
160	0.293	255	255	255	69.293	79.279	0.917	74.799	100	9690	787	898	106.699	0.615	1.49106
45	0.471	255	255	255	57.28	22.465	0.934	120.072	100	15555	648	259	41.186	0.703	1.32859
97	0.463	255	255	255	24.505	54.493	0.934	118.103	100	15300	275	617	138.814	0.778	1.20051
177	0.417	255	255	255	71.69	83.715	0.934	106.293	100	13770	812	949	131.186	0.683	1.3675
178	0.378	255	255	255	13.537	84.526	0.934	96.451	100	12495	151	958	131.186	0.621	1.50403
38	0.394	255	255	255	66.338	21.607	0.946	100.388	100	13005	753	251	68.199	0.527	1.79507
70	0.347	255	255	255	37.655	41.06	0.946	88.577	100	11475	426	472	68.199	0.556	1.70144
37	0.347	255	255	255	8.828	21.558	0.95	88.577	100	11475	95	248	33.69	0.621	1.52979
132	0.316	255	255	255	70.77	68.12	0.95	80.704	100	10455	801	779	33.69	0.55	1.72727
21	0.494	255	255	255	61.505	19.098	0.982	125.977	100	16320	695	215	153.435	0.703	1.39687
94	0.463	255	255	255	12.734	52.863	0.982	118.103	100	15300	140	599	153.435	0.695	1.41295
98	0.378	255	255	255	28.128	54.418	0.982	96.451	100	12495	315	617	169.695	0.609	1.61248
136	0.232	255	255	255	87.092	71.101	0.982	59.052	100	7650	989	815	63.435	0.463	2.12095
40	0.355	255	255	255	58.166	21.768	1.002	90.546	100	11730	656	246	164.745	0.615	1.62927
77	0.293	255	255	255	35.638	45.515	1.002	74.799	100	9690	401	522	37.875	0.435	2.30345
108	0.324	255	255	255	20.036	56.866	1.002	82.672	100	10710	225	643	127.875	0.559	1.79249
15	0.417	255	255	255	72.575	17.954	1.025	106.293	100	13770	821	207	30.964	0.703	1.45804
58	0.54	255	255	255	33.147	29.951	1.025	137.787	100	17850	374	346	59.036	0.791	1.29583
176	0.533	255	255	255	7.7	83.786	1.025	135.819	100	17595	85	959	59.036	0.747	1.37216
81	0.278	255	255	255	28.186	49.159	1.028	70.862	100	9180	319	554	109.983	0.405	2.53827
95	0.247	255	255	255	11.866	53.317	1.028	62.988	100	8160	129	605	160.017	0.351	2.92877
118	0.347	255	255	255	18.139	60.37	1.028	88.577	100	11475	205	693	70.017	0.527	1.95066
137	0.432	255	255	255	69.752	71.148	1.028	110.23	100	14280	788	808	160.017	0.527	1.95066
148	0.525	255	255	255	0.43	74.195	1.028	133.85	100	17340	3	839	109.983	0.703	1.4623
159	0.648	255	255	255	84.464	79.075	1.028	165.345	100	21420	956	897	160.017	0.966	1.06418
175	0.618	255	255	255	21.751	82.912	1.028	157.471	100	20400	242	942	160.017	0.791	1.29962
8	0.262	255	255	255	23.874	15.375	1.072	66.925	100	8670	268	180	55.008	0.407	2.63391
27	0.394	255	255	255	21.985	20.355	1.072	100.388	100	13005	247	237	55.008	0.559	1.91771
52	0.262	255	255	255	33.976	27.316	1.072	66.925	100	8670	382	307	145.008	0.435	2.46437
69	0.44	255	255	255	65.32	40.82	1.072	112.198	100	14535	740	470	55.008	0.615	1.74309
167	0.448	255	255	255	76.689	80.739	1.072	114.167	100	14790	870	924	55.008	0.609	1.76026
172	0.633	255	255	255	77.684	82.078	1.072	161.408	100	20910	881	929	124.992	0.864	1.24074
140	0.556	255	255	255	84.776	72.045	1.087	141.724	100	18360	959	822	14.036	0.703	1.54623
35	0.556	255	255	255	19.464	21.472	1.101	141.724	100	18360	217	249	61.39	0.747	1.4739
89	0.378	255	255	255	41	52.083	1.101	96.451	100	12495	461	596	28.61	0.511	2.1546
146	0.309	255	255	255	83.655	73.437	1.101	78.736	100	10200	949	841	61.39	0.432	2.54861
122	0.201	255	255	255	3.558	60.4	1.111	51.178	100	6630	34	690	18.435	0.373	2.97855
134	0.44	255	255	255	66.895	69.634	1.111	112.198	100	14535	761	787	108.435	0.725	1.53241
149	0.618	255	255	255	82.096	74.482	1.111	157.471	100	20400	928	849	18.435	0.791	1.40455
9	0.394	255	255	255	70.042	15.388	1.125	100.388	100	13005	792	179	38.66	0.511	2.20157
71	0.718	255	255	255	58.411	41.48	1.125	183.06	100	23715	660	477	51.34	0.879	1.27986
79	0.301	255	255	255	32.583	46.611	1.125	76.767	100	9945	367	536	51.34	0.419	2.68496
174	0.594	255	255	255	9.173	82.887	1.125	151.566	100	19635	101	938	128.66	0.746	1.50804
13	0.316	255	255	255	19.666	17.562	1.146	80.704	100	10455	218	204	32.471	0.504	2.27381
101	0.733	255	255	255	37.468	55.171	1.146	186.997	100	24225	421	631	32.471	0.879	1.30375
29	0.301	255	255	255	65.936	20.612	1.172	76.767	100	9945	748	241	77.005	0.465	2.52043
157	0.579	255	255	255	7.726	78.123	1.172	147.629	100	19125	86	896	77.005	0.772	1.51813
185	0.401	255	255	255	13.637	89.368	1.172	102.356	100	13260	153	1011	102.995	0.615	1.90569
133	0.857	255	255	255	28.535	68.837	1.182	218.491	100	28305	320	788	41.987	1.054	1.12144
49	0.247	255	255	255	6.889	26.418	1.195	62.988	100	8160	76	307	72.897	0.381	3.13648
139	0.355	255	255	255	28.449	72.017	1.195	90.546	100	11730	322	826	72.897	0.433	2.75982
150	0.579	255	255	255	18.622	74.713	1.195	147.629	100	19125	209	856	53.973	0.746	1.60188
32	0.895	255	255	255	57.21	21.09	1.221	228.333	100	29580	648	234	120.256	1.054	1.15844
92	0.471	255	255	255	28.831	52.683	1.221	120.072	100	15555	322	603	30.256	0.573	2.13089
126	0.425	255	255	255	82.547	64.837	1.221	108.261	100	14025	935	732	120.256	0.605	2.01818
151	0.556	255	255	255	84.235	74.787	1.221	141.724	100	18360	954	845	149.744	0.764	1.59817
153	0.409	255	255	255	82.376	76.594	1.221	104.325	100	13515	930	868	149.744	0.693	1.7619
7	0.479	255	255	255	68.475	15.289	1.224	122.04	100	15810	776	180	68.962	0.583	2.09949
24	0.378	255	255	255	23.599	20.13	1.224	96.451	100	12495	261	232	21.038	0.707	1.73126
25	0.672	255	255	255	56.874	20.038	1.224	171.25	100	22185	641	230	21.038	0.703	1.74111
144	0.733	255	255	255	82.737	72.58	1.224	186.997	100	24225	940	833	68.962	0.864	1.41667
34	0.409	255	255	255	16.732	21.42	1.249	104.325	100	13515	183	247	39.289	0.771	1.61997
67	0.795	255	255	255	65.855	39.299	1.249	202.744	100	26265	744	452	39.289	0.932	1.34013
30	0.656	255	255	255	68.416	20.987	1.258	167.313	100	21675	775	232	114.775	0.791	1.59039
119	0.378	255	255	255	11.677	60.349	1.258	96.451	100	12495	127	684	155.225	0.511	2.46184
104	0.733	255	255	255	22.406	55.505	1.267	186.997	100	24225	249	628	146.31	0.864	1.46644
142	0.324	255	255	255	85.857	72.247	1.267	82.672	100	10710	970	827	33.69	0.5	2.534
130	0.332	255	255	255	66.106	67.103	1.306	84.641	100	10965	746	766	19.654	0.393	3.32316
114	0.857	255	255	255	34.572	58.593	1.318	218.491	100	28305	387	663	143.13	0.934	1.41113
61	0.88	255	255	255	20.439	34.028	1.338	224.396	100	29070	229	393	66.801	1.054	1.26945
110	0.255	255	255	255	48.481	57.048	1.341	64.957	100	8415	549	657	58.392	0.512	2.61914
31	0.826	255	255	255	54.635	21.044	1.344	210.618	100	27285	615	240	11.31	0.966	1.3913
46	0.525	255	255	255	66.383	22.823	1.389	133.85	100	17340	754	253	108.435	0.725	1.91586
87	0.278	255	255	255	63.754	51.383	1.389	70.862	100	9180	717	587	18.435	0.369	3.76423
55	0.61	255	255	255	6.86	28.683	1.417	155.503	100	20145	77	318	97.125	0.778	1.82134
33	0.872	255	255	255	72.897	21.184	1.43	222.428	100	28815	826	250	79.38	1.054	1.35674
65	1.196	255	255	255	68.417	38.704	1.43	305.1	100	39525	776	433	100.62	1.142	1.25219
78	0.332	255	255	255	30.382	45.716	1.43	84.641	100	10965	340	526	42.51	0.373	3.83378
100	0.579	255	255	255	26.188	54.65	1.43	147.629	100	19125	289	624	10.62	0.615	2.3252
16	0.903	255	255	255	21.44	18.21	1.441	230.301	100	29835	238	212	37.569	1.054	1.36717
11	0.471	255	255	255	23.19	17.398	1.449	120.072	100	15555	262	191	104.036	0.703	2.06117
22	0.841	255	255	255	24.545	19.263	1.454	214.554	100	27795	272	217	154.983	0.944	1.54025
17	1.05	255	255	255	59.221	18.374	1.462	267.701	100	34680	667	214	32.735	0.994	1.47082
60	0.355	255	255	255	71.011	31.792	1.557	90.546	100	11730	800	360	163.61	0.372	4.18548
5	0.826	255	255	255	77.089	14.772	1.564	210.618	100	27285	871	174	38.157	0.896	1.74554
26	0.787	255	255	255	17.616	20.241	1.641	200.776	100	26010	192	234	15.524	0.75	2.188
66	0.625	255	255	255	54.58	39.316	1.651	159.439	100	20655	617	437	115.201	1.16	1.42328
53	0.448	255	255	255	69.771	28.3	1.69	114.167	100	14790	792	314	98.973	0.439	3.84966
84	0.656	255	255	255	21.836	50.838	1.706	167.313	100	21675	238	577	168.111	0.607	2.81054
68	0.718	255	255	255	57.584	39.979	1.744	183.06	100	23715	648	462	40.914	0.629	2.77266
12	0.98	255	255	255	55.376	17.582	1.811	249.985	100	32385	623	206	39.094	0.849	2.1331
102	0.448	255	255	255	16.643	55.384	1.811	114.167	100	14790	180	639	39.094	0.89	2.03483
181	0.563	255	255	255	26.946	85.716	1.811	143.692	100	18615	297	977	14.036	0.547	3.31079
41	0.934	255	255	255	68.701	22.119	1.828	238.175	100	30855	771	257	35.218	1.119	1.6336
105	0.579	255	255	255	11.832	55.893	1.847	147.629	100	19125	124	632	154.654	0.568	3.25176
64	1.721	255	255	255	68.058	37.175	1.88	438.951	100	56865	769	432	52.595	1.322	1.42209
183	1.22	255	255	255	8.318	87.495	1.893	311.005	100	40290	91	985	111.801	1.071	1.76751
164	0.988	255	255	255	82.228	80.597	1.945	251.954	100	32640	929	927	71.565	0.956	2.03452
4	0.803	255	255	255	25.368	14.291	2.003	204.712	100	26520	282	172	52.125	0.559	3.58318
50	1.058	255	255	255	13.659	26.509	2.007	269.669	100	34935	145	299	156.801	0.952	2.10819
88	1.498	255	255	255	22.823	51.786	2.028	381.867	100	49470	249	588	175.03	1.054	1.9241
10	1.003	255	255	255	14.857	16.063	2.112	255.891	100	33150	158	186	16.928	0.689	3.06531
112	1.59	251.286	0	255	19.291	58.621	2.196	399.583	98.544	51765	211	676	36.87	1.476	1.4878
93	0.718	255	255	255	8.958	52.96	2.203	183.06	100	23715	89	598	156.501	0.659	3.34294
82	0.648	255	255	255	34.449	49.974	2.364	165.345	100	21420	382	578	48.013	0.694	3.40634
73	1.135	255	255	255	55.807	43.24	2.474	289.353	100	37485	633	478	96.116	0.939	2.63472
99	1.243	255	255	255	21.444	55.624	2.584	316.911	100	41055	241	618	107.819	0.963	2.68328
62	0.849	255	255	255	52.462	35.315	2.659	216.523	100	28050	596	389	97.595	0.612	4.34477
109	0.841	255	255	255	27.508	57.834	2.846	214.554	100	27795	308	675	81.119	0.911	3.12404
59	1.289	255	255	255	68.918	31.492	2.947	328.721	100	42585	778	375	63.435	0.953	3.09234
36	2.516	255	255	255	13.936	22.549	3.106	641.695	100	83130	158	275	81.87	2.19	1.41826
91	1.32	255	255	255	32.474	53.047	3.217	336.594	100	43605	356	595	145.008	1.012	3.17885
107	2.038	255	255	255	15.276	58.116	3.231	519.655	100	67320	165	673	67.62	2.013	1.60507
20	4.13	255	255	255	62.885	20.31	4.155	1053.09	100	136425	694	226	166.551	2.876	1.44471
48	3.373	241.579	0	255	70.316	25.811	4.335	814.913	94.737	105570	796	270	107.7	2.194	1.97584
40	0.216	255	255	255	28.73	34.497	0.634	55.115	100	7140	324	391	146.31	0.439	1.44419
85	0.201	255	255	255	54.915	60.302	0.634	51.178	100	6630	622	688	33.69	0.439	1.44419
99	0.224	255	255	255	42.416	64.744	0.634	57.083	100	7395	481	740	56.31	0.527	1.20304
100	0.239	255	255	255	69.58	65.096	0.634	61.02	100	7905	789	739	146.31	0.527	1.20304
108	0.208	255	255	255	42.516	68.88	0.634	53.146	100	6885	481	786	33.69	0.497	1.27565
120	0.216	255	255	255	53.606	80.306	0.634	55.115	100	7140	607	912	146.31	0.527	1.20304
20	0.224	255	255	255	39.729	21.588	0.64	57.083	100	7395	451	249	74.055	0.527	1.21442
5	0.255	255	255	255	85.275	9.264	0.669	64.957	100	8415	969	102	113.199	0.583	1.14751
17	0.286	255	255	255	21.481	20.427	0.669	72.83	100	9435	243	229	113.199	0.615	1.0878
81	0.216	255	255	255	47.218	59.631	0.669	55.115	100	7140	534	677	156.801	0.497	1.34608
107	0.262	255	255	255	63.574	68.855	0.669	66.925	100	8670	720	785	23.199	0.615	1.0878
63	0.247	255	255	255	35.426	50.25	0.686	62.988	100	8160	400	574	39.806	0.527	1.30171
69	0.224	255	255	255	41.801	55.962	0.708	57.083	100	7395	472	635	150.255	0.497	1.42455
124	0.247	255	255	255	65.968	89.031	0.708	62.988	100	8160	747	1015	29.745	0.527	1.34345
48	0.232	255	255	255	25.787	37.812	0.725	59.052	100	7650	293	426	104.036	0.439	1.65148
61	0.239	255	255	255	35.615	49.384	0.725	61.02	100	7905	404	558	104.036	0.439	1.65148
83	0.309	255	255	255	66.797	60.249	0.725	78.736	100	10200	759	682	104.036	0.615	1.17886
1	0.208	255	255	255	80.718	1.648	0.751	53.146	100	6885	915	20	20.556	0.351	2.1396
19	0.278	255	255	255	36.827	21.506	0.751	70.862	100	9180	418	249	69.444	0.527	1.42505
27	0.262	255	255	255	45.555	26.257	0.751	66.925	100	8670	517	295	110.556	0.439	1.71071
50	0.301	255	255	255	40.423	38.371	0.751	76.767	100	9945	456	438	20.556	0.621	1.20934
13	0.293	255	255	255	41.342	19.091	0.756	74.799	100	9690	468	221	54.462	0.611	1.23732
25	0.324	255	255	255	34.393	26.056	0.756	82.672	100	10710	389	293	125.538	0.615	1.22927
39	0.293	255	255	255	39.402	34.112	0.756	74.799	100	9690	445	386	144.462	0.611	1.23732
44	0.232	255	255	255	47.833	36.617	0.756	59.052	100	7650	541	419	35.538	0.471	1.6051
75	0.332	255	255	255	55.985	58.027	0.756	84.641	100	10965	633	662	35.538	0.615	1.22927
86	0.293	255	255	255	45.263	61.064	0.756	74.799	100	9690	512	692	144.462	0.527	1.43454
106	0.293	255	255	255	55.476	68.664	0.756	74.799	100	9690	629	778	125.538	0.615	1.22927
111	0.301	255	255	255	66.666	71.608	0.756	76.767	100	9945	755	817	35.538	0.615	1.22927
12	0.27	255	255	255	32.328	18.585	0.786	68.894	100	8925	366	216	63.435	0.527	1.49146
57	0.316	255	255	255	26.882	43.525	0.786	80.704	100	10455	302	498	26.565	0.615	1.27805
65	0.262	255	255	255	58.48	53.149	0.786	66.925	100	8670	664	609	63.435	0.511	1.53816
68	0.371	255	255	255	57.904	55.091	0.786	94.483	100	12240	657	623	116.565	0.695	1.13094
74	0.255	255	255	255	61.108	57.77	0.786	64.957	100	8415	691	656	153.435	0.527	1.49146
104	0.224	255	255	255	42.128	67.189	0.786	57.083	100	7395	478	769	63.435	0.439	1.79043
117	0.286	255	255	255	61.79	77.604	0.786	72.83	100	9435	701	887	63.435	0.527	1.49146
98	0.255	255	255	255	47.533	64.261	0.81	64.957	100	8415	538	728	130.601	0.511	1.58513
8	0.417	255	255	255	29.602	17.328	0.829	106.293	100	13770	333	195	147.995	0.703	1.17923
14	0.394	255	255	255	31.642	19.488	0.829	100.388	100	13005	356	224	32.005	0.703	1.17923
28	0.378	255	255	255	30.502	26.366	0.829	96.451	100	12495	343	298	147.995	0.703	1.17923
90	0.27	255	255	255	58.073	61.917	0.829	68.894	100	8925	657	707	32.005	0.511	1.62231
96	0.409	255	255	255	66.19	64.237	0.829	104.325	100	13515	749	733	32.005	0.703	1.17923
101	0.332	255	255	255	47.68	65.95	0.829	84.641	100	10965	538	752	32.005	0.583	1.42196
112	0.201	255	255	255	45.639	71.706	0.829	51.178	100	6630	517	820	57.995	0.379	2.18734
10	0.371	255	255	255	35.552	17.969	0.834	94.483	100	12240	403	209	71.565	0.615	1.3561
32	0.262	255	255	255	34.947	27.288	0.834	66.925	100	8670	393	311	18.435	0.439	1.89977
84	0.255	255	255	255	65.126	60.278	0.834	64.957	100	8415	736	687	18.435	0.522	1.5977
93	0.255	255	255	255	49.074	63.308	0.834	64.957	100	8415	554	718	161.565	0.5	1.668
127	0.247	255	255	255	70.413	89.786	0.834	62.988	100	8160	797	1021	161.565	0.439	1.89977
35	0.224	255	255	255	33.182	30.028	0.865	57.083	100	7395	373	340	156.038	0.527	1.64137
113	0.355	255	255	255	65.537	72.382	0.896	90.546	100	11730	745	829	78.69	0.527	1.70019
29	0.27	255	255	255	80.254	26.876	0.905	68.894	100	8925	910	301	119.055	0.559	1.61896
79	0.216	255	255	255	70.911	58.621	0.905	55.115	100	7140	806	672	60.945	0.496	1.8246
116	0.509	255	255	255	54.536	76.273	0.905	129.914	100	16830	616	866	150.945	0.791	1.14412
123	0.316	255	255	255	89.433	88.518	0.905	80.704	100	10455	1013	1005	150.945	0.527	1.71727
7	0.417	255	255	255	24.781	14.384	0.917	106.293	100	13770	277	163	163.301	0.615	1.49106
62	0.355	255	255	255	34.114	49.787	0.917	90.546	100	11730	387	572	73.301	0.583	1.5729
67	0.432	255	255	255	31.497	54.618	0.917	110.23	100	14280	358	616	106.699	0.615	1.49106
15	0.448	255	255	255	40.489	19.895	0.946	114.167	100	14790	458	231	68.199	0.786	1.20356
34	0.409	255	255	255	40.931	29.162	0.95	104.325	100	13515	461	335	33.69	0.615	1.54472
102	0.201	255	255	255	74.126	65.928	0.95	51.178	100	6630	841	756	56.31	0.432	2.19907
55	0.255	255	255	255	39.522	41.463	0.982	64.957	100	8415	448	467	100.305	0.351	2.79772
119	0.316	255	255	255	55.697	80.15	0.994	80.704	100	10455	630	916	45	0.536	1.85448
4	0.386	255	255	255	85.17	6.104	1.002	98.419	100	12750	966	74	52.125	0.615	1.62927
21	0.479	255	255	255	42.838	22.126	1.002	122.04	100	15810	485	257	74.745	0.703	1.42532
89	0.324	255	255	255	68.781	61.11	1.002	82.672	100	10710	778	697	15.255	0.439	2.28246
11	0.363	255	255	255	39.607	17.836	1.025	92.514	100	11985	447	207	30.964	0.583	1.75815
37	0.548	255	255	255	42.1	32.464	1.025	139.756	100	18105	474	367	149.036	0.791	1.29583
87	0.332	255	255	255	59.206	61.279	1.025	84.641	100	10965	672	692	120.964	0.576	1.77951
97	0.494	255	255	255	70.895	64.326	1.025	125.977	100	16320	803	736	30.964	0.832	1.23197
125	0.556	255	255	255	63.892	89.405	1.025	141.724	100	18360	722	1020	30.964	0.808	1.26856
47	0.401	255	255	255	34.387	37.656	1.028	102.356	100	13260	390	423	109.983	0.667	1.54123
76	0.27	255	255	255	73.363	57.913	1.028	68.894	100	8925	829	657	160.017	0.439	2.34169
91	0.517	255	255	255	55.16	62.552	1.028	131.882	100	17085	625	718	70.017	0.791	1.29962
18	0.401	255	255	255	32.423	20.706	1.062	102.356	100	13260	366	242	65.556	0.615	1.72683
46	0.486	255	255	255	27.759	37.265	1.062	124.008	100	16065	312	419	114.444	0.695	1.52806
118	0.525	255	255	255	45.132	79.484	1.072	133.85	100	17340	510	900	124.992	0.707	1.51627
92	0.371	255	255	255	66.379	62.905	1.087	94.483	100	12240	749	713	165.964	0.527	2.06262
52	0.347	255	255	255	39.51	39.18	1.125	88.577	100	11475	445	451	51.34	0.559	2.01252
60	0.363	255	255	255	33.301	48.146	1.142	92.514	100	11985	378	554	67.38	0.611	1.86907
95	0.432	255	255	255	57.116	64.41	1.142	110.23	100	14280	647	739	67.38	0.64	1.78437
59	0.347	255	255	255	35.869	47.134	1.172	88.577	100	11475	407	544	77.005	0.439	2.6697
26	0.255	255	255	255	33.763	26.41	1.179	64.957	100	8415	381	294	116.565	0.461	2.55748
78	0.378	255	255	255	53.12	58.581	1.179	96.451	100	12495	598	671	26.565	0.583	2.0223
126	0.448	255	255	255	67.089	89.555	1.179	114.167	100	14790	757	1021	26.565	0.78	1.51154
41	0.78	255	255	255	42.569	35.5	1.182	198.807	100	25755	480	409	41.987	0.943	1.25345
31	0.533	255	255	255	42.177	27.411	1.195	135.819	100	17595	474	309	162.897	0.774	1.54393
121	0.448	255	255	255	88.092	84.664	1.195	114.167	100	14790	1000	970	72.897	0.543	2.20074
110	0.726	255	255	255	51.545	71.051	1.224	185.029	100	23970	583	815	68.962	0.864	1.41667
24	0.363	255	255	255	42.115	24.009	1.258	92.514	100	11985	473	277	24.775	0.526	2.39163
42	0.895	255	255	255	24.048	36.212	1.258	228.333	100	29580	272	405	114.775	0.966	1.30228
49	0.27	255	255	255	39.219	38.062	1.258	68.894	100	8925	439	434	12.095	0.323	3.89474
72	0.232	255	255	255	66.776	57.003	1.258	59.052	100	7650	754	652	24.775	0.343	3.66764
103	0.517	255	255	255	45.9	66.848	1.258	131.882	100	17085	515	760	167.905	0.527	2.3871
30	0.911	255	255	255	44.986	27.109	1.306	232.27	100	30090	505	311	19.654	0.966	1.35197
109	0.54	255	255	255	48.553	70.692	1.338	137.787	100	17850	549	798	113.199	0.555	2.41081
6	0.756	255	255	255	88.499	12.863	1.372	192.902	100	24990	1003	140	129.806	0.746	1.83914
23	0.664	255	255	255	37.325	22.835	1.372	169.281	100	21930	420	255	129.806	0.87	1.57701
38	0.201	255	255	255	85.007	33.701	1.417	51.178	100	6630	964	376	119.745	0.35	4.04857
71	0.78	255	255	255	52.711	57.256	1.441	198.807	100	25755	592	657	37.569	0.934	1.54283
77	0.795	255	255	255	63.044	58.598	1.449	202.744	100	26265	710	670	14.036	0.915	1.58361
66	0.386	255	255	255	63.74	53.812	1.454	98.419	100	12750	719	616	25.017	0.528	2.75379
54	0.625	255	255	255	30.819	41.277	1.462	159.439	100	20655	347	478	57.265	0.717	2.03905
33	0.625	255	255	255	33.883	28.662	1.494	159.439	100	20655	380	331	28.072	0.948	1.57595
45	0.332	255	255	255	32.985	37.192	1.496	84.641	100	10965	376	415	93.366	0.351	4.26211
53	0.579	255	255	255	25.502	39.783	1.512	147.629	100	19125	285	460	54.462	0.621	2.43478
2	0.895	255	255	255	82.285	2.21	1.534	228.333	100	29580	934	17	103.241	0.791	1.93932
115	0.78	255	255	255	50.812	74.502	1.534	198.807	100	25755	571	844	156.371	0.722	2.12465
70	0.594	255	255	255	50.997	57.073	1.554	151.566	100	19635	575	644	132.709	0.662	2.34743
22	0.973	255	255	255	39.679	22.887	1.584	248.017	100	32130	445	265	33.69	1.054	1.50285
82	1.15	255	255	255	48.896	60.328	1.584	293.29	100	37995	548	692	33.69	1.142	1.38704
9	0.502	255	255	255	42.673	17.704	1.634	127.945	100	16575	481	209	53.746	0.59	2.76949
88	0.957	255	255	255	49.655	61.716	1.679	244.08	100	31620	567	693	96.009	1.305	1.28659
16	0.695	255	255	255	87.375	20.803	1.69	177.155	100	22950	993	246	81.027	0.527	3.20683
94	1.359	255	255	255	55.15	64.472	1.697	346.436	100	44880	620	728	158.749	1.406	1.20697
3	0.486	255	255	255	86.213	4.892	1.706	124.008	100	16065	976	65	55.491	0.578	2.95156
73	0.502	255	255	255	47.636	57.696	1.733	127.945	100	16575	537	667	59.534	0.597	2.90285
105	0.857	255	255	255	66.595	67.894	1.988	218.491	100	28305	750	782	45	0.908	2.18943
58	0.926	255	255	255	38.112	44.374	2.023	236.207	100	30600	429	519	55.62	1.527	1.32482
51	1.729	250.446	0	255	34.388	39.924	2.279	433.046	98.214	56100	389	441	117.553	1.685	1.35252
43	1.513	255	255	255	30.392	36.896	2.32	385.804	100	49980	334	429	37.304	1.463	1.58578
114	0.88	255	255	255	48.4	74.563	2.594	224.396	100	29070	535	856	28.301	1.037	2.50145
64	1.065	255	255	255	33.18	52.102	2.612	271.638	100	35190	369	604	47.726	0.916	2.85153
122	1.76	255	255	255	69.822	89.063	2.621	448.793	100	58140	782	1024	39.56	1.18	2.22119
36	2.493	255	255	255	33.989	32.581	3.632	635.79	100	82365	378	356	147.848	2.152	1.68773
80	3.682	253.931	0	255	52.334	60.156	4.032	934.985	99.581	121125	572	693	11.31	1.837	2.19488
143	0.216	255	255	255	11.246	76.989	0.589	55.115	100	7140	127	873	116.565	0.527	1.11765
54	0.216	255	255	255	68.828	34.318	0.634	55.115	100	7140	781	388	123.69	0.527	1.20304
59	0.208	255	255	255	72.71	35.161	0.634	53.146	100	6885	825	403	56.31	0.527	1.20304
65	0.224	255	255	255	23.469	37.917	0.634	57.083	100	7395	264	430	146.31	0.527	1.20304
106	0.247	255	255	255	0.791	52.276	0.634	62.988	100	8160	7	592	123.69	0.527	1.20304
91	0.232	255	255	255	22.032	46.056	0.64	59.052	100	7650	249	521	105.945	0.527	1.21442
7	0.201	255	255	255	66.273	21.745	0.669	51.178	100	6630	753	244	113.199	0.439	1.52392
14	0.239	246.774	0	255	70.745	25.478	0.669	59.052	96.774	7650	802	292	23.199	0.527	1.26945
18	0.208	255	255	255	9.796	26.314	0.669	53.146	100	6885	110	296	113.199	0.439	1.52392
22	0.232	255	255	255	9.369	27.277	0.669	59.052	100	7650	105	314	66.801	0.527	1.26945
26	0.232	255	255	255	61.952	28.261	0.669	59.052	100	7650	704	318	113.199	0.527	1.26945
70	0.208	255	255	255	24.273	40.397	0.669	53.146	100	6885	275	456	113.199	0.439	1.52392
81	0.208	255	255	255	28.862	43.973	0.669	53.146	100	6885	327	504	66.801	0.439	1.52392
145	0.232	255	255	255	16.517	77.957	0.686	59.052	100	7650	185	890	39.806	0.527	1.30171
12	0.201	235.385	0	255	11.466	24.932	0.708	47.241	92.308	6120	128	287	60.255	0.439	1.61276
86	0.262	255	255	255	34.88	45.467	0.708	66.925	100	8670	395	514	119.745	0.527	1.34345
92	0.216	255	255	255	56.707	47.234	0.708	55.115	100	7140	643	541	60.255	0.439	1.61276
102	0.224	255	255	255	55.768	50.729	0.708	57.083	100	7395	633	574	119.745	0.439	1.61276
119	0.278	255	255	255	1.381	57.489	0.708	70.862	100	9180	14	658	60.255	0.589	1.20204
140	0.286	255	255	255	13.299	73.397	0.708	72.83	100	9435	149	832	119.745	0.615	1.15122
121	0.208	255	255	255	1.69	58.385	0.725	53.146	100	6885	15	664	165.964	0.439	1.65148
127	0.286	255	255	255	64.884	61.151	0.725	72.83	100	9435	737	692	104.036	0.615	1.17886
135	0.208	255	255	255	50.384	68.405	0.751	53.146	100	6885	572	775	110.556	0.439	1.71071
49	0.208	255	255	255	6.601	33.411	0.756	53.146	100	6885	73	384	54.462	0.439	1.7221
63	0.363	255	255	255	19.967	37.511	0.756	92.514	100	11985	224	424	125.538	0.683	1.10688
85	0.34	255	255	255	32.458	45.112	0.756	86.609	100	11220	367	510	125.538	0.615	1.22927
113	0.324	255	255	255	3.843	55.437	0.756	82.672	100	10710	42	627	125.538	0.615	1.22927
116	0.27	255	255	255	9.209	57.13	0.756	68.894	100	8925	102	647	125.538	0.511	1.47945
120	0.34	255	255	255	55.738	57.536	0.756	86.609	100	11220	631	652	144.462	0.615	1.22927
148	0.224	255	255	255	5.933	80.856	0.756	57.083	100	7395	65	917	125.538	0.439	1.7221
27	0.216	255	255	255	10.998	28.987	0.786	55.115	100	7140	123	334	63.435	0.439	1.79043
67	0.371	255	255	255	61.823	38.447	0.786	94.483	100	12240	700	435	153.435	0.703	1.11807
101	0.347	255	255	255	59.29	50.666	0.786	88.577	100	11475	671	579	26.565	0.615	1.27805
118	0.286	255	255	255	36.531	57.193	0.786	72.83	100	9435	414	655	63.435	0.527	1.49146
137	0.347	255	255	255	56.069	69.964	0.786	88.577	100	11475	634	798	26.565	0.615	1.27805
46	0.293	255	255	255	37.102	32.903	0.81	74.799	100	9690	419	371	130.601	0.559	1.44902
64	0.247	255	255	255	3.989	37.831	0.81	62.988	100	8160	44	435	77.471	0.439	1.8451
125	0.232	255	255	255	34.596	59.958	0.81	59.052	100	7650	390	685	40.601	0.5	1.62
56	0.378	255	255	255	31.243	34.798	0.829	96.451	100	12495	353	392	122.005	0.682	1.21554
93	0.216	255	255	255	4.829	47.82	0.829	55.115	100	7140	50	542	147.995	0.439	1.88838
105	0.208	255	255	255	49.206	51.975	0.829	53.146	100	6885	556	589	147.995	0.432	1.91898
147	0.394	255	255	255	6.945	79.801	0.829	100.388	100	13005	75	906	147.995	0.703	1.17923
78	0.224	255	255	255	29.095	42.804	0.834	57.083	100	7395	330	492	71.565	0.351	2.37607
104	0.44	255	255	255	29.218	51.944	0.834	112.198	100	14535	331	587	108.435	0.786	1.06107
144	0.363	255	255	255	1.526	77.208	0.834	92.514	100	11985	16	874	108.435	0.615	1.3561
146	0.409	255	255	255	4.137	78.106	0.834	104.325	100	13515	43	891	18.435	0.703	1.18634
77	0.355	255	255	255	6.099	42.803	0.865	90.546	100	11730	67	492	66.038	0.615	1.4065
138	0.247	255	255	255	65.092	72.14	0.865	62.988	100	8160	737	824	23.962	0.439	1.97039
32	0.448	246.207	0	255	68.004	29.849	0.879	110.23	96.552	14280	771	344	53.13	0.703	1.25036
80	0.293	255	255	255	26.628	43.95	0.879	74.799	100	9690	300	504	53.13	0.527	1.66793
31	0.262	255	255	255	62.757	29.58	0.883	66.925	100	8670	714	332	95.711	0.439	2.01139
28	0.278	255	255	255	9.879	29.377	0.896	70.862	100	9180	112	339	78.69	0.527	1.70019
72	0.309	255	255	255	17.791	40.747	0.896	78.736	100	10200	197	464	168.69	0.439	2.041
95	0.324	255	255	255	7.179	48.383	0.896	82.672	100	10710	80	546	101.31	0.527	1.70019
108	0.471	255	255	255	57.159	53.196	0.905	120.072	100	15555	648	601	119.055	0.746	1.21314
133	0.448	255	255	255	72.611	65.24	0.905	114.167	100	14790	824	747	60.945	0.746	1.21314
57	0.278	255	255	255	33.418	34.814	0.917	70.862	100	9180	375	398	16.699	0.49	1.87143
100	0.401	255	255	255	65.122	49.823	0.917	102.356	100	13260	739	572	73.301	0.703	1.30441
142	0.224	255	255	255	13.111	76.496	0.917	57.083	100	7395	143	872	16.699	0.439	2.08884
136	0.34	255	255	255	47.969	69.137	0.934	86.609	100	11220	542	790	41.186	0.559	1.67084
11	0.208	255	255	255	84.779	24.937	0.946	53.146	100	6885	963	289	68.199	0.457	2.07002
13	0.247	255	255	255	62.594	25.446	0.946	62.988	100	8160	710	285	111.801	0.405	2.3358
36	0.409	255	255	255	28.038	31.048	0.946	104.325	100	13515	317	348	111.801	0.615	1.53821
35	0.309	255	255	255	3.444	30.948	0.994	78.736	100	10200	36	348	135	0.56	1.775
40	0.363	255	255	255	5.22	31.931	1.002	92.514	100	11985	56	368	74.745	0.615	1.62927
114	0.44	250.526	0	255	54.595	56.038	1.002	110.23	98.246	14280	619	633	105.255	0.615	1.62927
1	0.34	255	255	255	8.333	17.899	1.025	86.609	100	11220	92	199	120.964	0.536	1.91231
149	0.371	255	255	255	12.408	85.261	1.025	94.483	100	12240	136	968	149.036	0.575	1.78261
109	0.455	255	255	255	0.528	53.318	1.028	116.135	100	15045	1	605	160.017	0.672	1.52976
124	0.633	255	255	255	62.855	59.943	1.028	161.408	100	20910	713	677	109.983	0.879	1.16951
97	0.448	255	255	255	42.536	49.82	1.062	114.167	100	14790	482	561	114.444	0.615	1.72683
3	0.239	255	255	255	72.034	18.902	1.072	61.02	100	7905	816	220	55.008	0.373	2.87399
79	0.278	255	255	255	18.253	42.9	1.072	70.862	100	9180	202	485	145.008	0.435	2.46437
103	0.34	255	255	255	3.472	51.21	1.072	86.609	100	11220	38	588	55.008	0.589	1.82003
134	0.425	255	255	255	48.766	67.652	1.072	108.261	100	14025	552	775	55.008	0.611	1.7545
84	0.556	255	255	255	51.452	44.774	1.087	141.724	100	18360	584	504	104.036	0.791	1.37421
17	0.471	255	255	255	66.896	26.168	1.111	120.072	100	15555	760	291	108.435	0.615	1.8065
82	0.548	247.817	0	255	6.663	44.456	1.118	135.819	97.183	17595	71	502	135	0.791	1.4134
152	0.239	255	255	255	89.269	89.629	1.125	61.02	100	7905	1011	1024	38.66	0.37	3.04054
87	0.463	246.5	0	255	25.577	45.959	1.142	114.167	96.667	14790	289	517	112.62	0.655	1.74351
88	0.749	255	255	255	5.442	45.965	1.142	190.934	100	24735	56	526	22.62	0.879	1.2992
151	0.409	255	255	255	4.354	89.381	1.142	104.325	100	13515	48	1011	112.62	0.554	2.06137
25	0.355	255	255	255	76.892	27.993	1.146	90.546	100	11730	870	316	147.529	0.621	1.84541
69	0.401	255	255	255	63.355	40.01	1.146	102.356	100	13260	717	461	57.529	0.687	1.66812
8	0.432	255	255	255	7.612	23.336	1.156	110.23	100	14280	85	272	81.254	0.527	2.19355
47	0.347	255	255	255	3.595	33.27	1.172	88.577	100	11475	35	377	167.005	0.653	1.79479
129	0.316	255	255	255	71.895	62.715	1.172	80.704	100	10455	817	707	102.995	0.414	2.83092
48	0.401	255	255	255	13.711	33.368	1.179	102.356	100	13260	151	378	153.435	0.791	1.49052
51	0.425	255	255	255	6.958	34.414	1.179	108.261	100	14025	77	399	63.435	0.788	1.49619
24	0.942	255	255	255	64.369	28.051	1.195	240.143	100	31110	730	313	107.103	1.054	1.13378
45	0.432	255	255	255	29.855	33.01	1.195	110.23	100	14280	338	382	72.897	0.553	2.16094
131	0.764	247.273	0	255	70.189	64.531	1.195	188.965	96.97	24480	797	728	107.103	0.879	1.3595
130	0.895	255	255	255	61.539	64.266	1.221	228.333	100	29580	695	735	30.256	1.108	1.10199
98	0.625	255	255	255	4.481	49.901	1.224	159.439	100	20655	49	575	68.962	0.747	1.63855
117	0.834	255	255	255	34.996	57.301	1.224	212.586	100	27540	396	659	68.962	0.966	1.26708
15	0.401	255	255	255	34.268	25.726	1.249	102.356	100	13260	385	288	129.289	0.529	2.36106
71	0.471	255	255	255	52.025	40.676	1.258	120.072	100	15555	589	469	65.225	0.527	2.3871
83	0.409	255	255	255	23.262	44.544	1.258	104.325	100	13515	257	504	167.905	0.674	1.86647
38	0.401	255	255	255	77.796	31.464	1.267	102.356	100	13260	879	361	33.69	0.536	2.36381
68	0.795	255	255	255	65.421	39.639	1.267	202.744	100	26265	740	457	56.31	0.904	1.40155
107	0.425	255	255	255	2.854	52.699	1.279	108.261	100	14025	30	592	105.945	0.568	2.25176
37	0.293	255	255	255	64.118	31.155	1.306	74.799	100	9690	724	352	160.346	0.439	2.97494
9	0.502	255	255	255	61.842	24.561	1.364	127.945	100	16575	702	287	75.069	0.575	2.37217
23	0.525	255	255	255	21.168	28.077	1.389	133.85	100	17340	239	328	71.565	0.611	2.27332
112	0.687	255	255	255	27.696	55.432	1.389	175.187	100	22695	311	638	55.305	0.746	1.86193
62	0.687	255	255	255	25.07	36.899	1.454	175.187	100	22695	278	424	25.017	0.672	2.16369
6	0.517	255	255	255	9.211	22.209	1.473	131.882	100	17085	102	260	72.646	0.6	2.455
2	0.556	255	255	255	11.779	19.075	1.494	141.724	100	18360	130	225	61.928	0.633	2.36019
20	0.386	255	255	255	31.32	26.909	1.494	98.419	100	12750	352	315	61.928	0.471	3.17197
141	0.679	255	255	255	67.175	73.982	1.496	173.218	100	22440	760	836	130.236	0.731	2.04651
110	0.587	255	255	255	30.958	53.811	1.501	149.598	100	19380	343	617	20.556	0.732	2.05055
33	0.463	255	255	255	6.977	30.693	1.534	118.103	100	15300	77	340	103.241	0.528	2.9053
74	0.702	255	255	255	4.494	41.883	1.534	179.123	100	23205	49	485	76.759	0.603	2.54395
96	0.347	255	255	255	58.165	49.456	1.534	88.577	100	11475	659	570	76.759	0.439	3.49431
34	0.664	255	255	255	30.204	30.925	1.537	169.281	100	21930	340	358	59.036	0.863	1.781
21	0.695	255	255	255	2.208	27.3	1.564	177.155	100	22950	21	304	128.157	0.746	2.09651
29	0.787	255	255	255	3.869	29.617	1.584	200.776	100	26010	37	331	146.31	1.116	1.41935
30	0.394	255	255	255	14.52	29.801	1.584	100.388	100	13005	162	347	70.56	0.426	3.71831
43	0.672	255	255	255	35.272	32.733	1.584	171.25	100	22185	394	378	33.69	0.589	2.6893
73	0.834	250.278	0	255	62.25	41.142	1.584	208.649	98.148	27030	699	472	33.69	1.344	1.17857
89	0.718	255	255	255	1.228	46.295	1.584	183.06	100	23715	11	519	109.44	0.668	2.37126
111	0.61	255	255	255	72.04	55.395	1.615	155.503	100	20145	818	623	112.38	0.707	2.2843
4	0.394	255	255	255	12.704	19.74	1.62	100.388	100	13005	138	232	49.399	0.457	3.54486
55	0.88	255	255	255	12.292	35.093	1.62	224.396	100	29070	135	391	130.601	0.864	1.875
90	0.803	255	255	255	54.655	46.552	1.634	204.712	100	26520	617	536	36.254	1.26	1.29683
115	0.733	255	255	255	58.759	56.38	1.667	186.997	100	24225	660	638	161.565	0.647	2.57651
19	0.239	255	255	255	77.544	26.892	1.726	61.02	100	7905	880	315	75.256	0.318	5.42767
42	0.98	255	255	255	21.459	32.91	1.726	249.985	100	32385	243	366	104.744	0.957	1.80355
99	1.058	255	255	255	6.488	50.148	1.751	269.669	100	34935	70	581	72.474	1.054	1.66129
123	1.104	253.217	0	255	55.825	59.263	1.811	279.511	99.301	36210	628	678	39.094	1.139	1.58999
61	0.926	255	255	255	12.204	37.235	1.835	236.207	100	30600	135	434	73.301	0.889	2.06412
150	0.332	255	255	255	86.368	88.479	1.862	84.641	100	10965	980	1019	70.71	0.409	4.55257
76	0.834	255	255	255	56.812	42.731	1.893	212.586	100	27540	640	497	68.199	0.968	1.95558
75	0.401	255	255	255	15.095	41.746	2.005	102.356	100	13260	161	482	28.811	0.458	4.37773
5	0.448	255	255	255	82.818	20.621	2.028	114.167	100	14790	939	246	72.35	0.424	4.78302
128	0.795	255	255	255	52.907	62.738	2.051	202.744	100	26265	601	726	80.134	0.527	3.89184
122	0.718	255	255	255	30.868	59.344	2.116	183.06	100	23715	350	688	85.236	0.439	4.82005
126	1.528	255	255	255	60.963	60.513	2.125	389.741	100	50490	689	680	119.745	1.243	1.70957
60	0.664	255	255	255	28.457	35.304	2.14	169.281	100	21930	312	399	160.821	0.604	3.54305
132	1.104	255	255	255	65.686	64.773	2.24	281.48	100	36465	744	750	48.18	1.478	1.51556
44	0.687	255	255	255	58.401	33.566	2.474	175.187	100	22695	665	368	96.116	0.46	5.37826
10	1.343	253.534	0	255	82.612	25.386	2.513	340.531	99.425	44115	928	292	36.469	1.413	1.77849
52	1.513	255	255	255	63.572	34.519	2.846	385.804	100	49980	706	393	171.119	1.007	2.82622
53	1.127	255	255	255	59.633	35.116	2.901	287.385	100	37230	667	408	35.134	1.163	2.49441
39	0.533	255	255	255	60.208	32.637	2.964	135.819	100	17595	682	354	101.976	0.39	7.6
50	2.802	255	255	255	24.149	34.121	3.619	714.525	100	92565	256	390	5.572	1.805	2.00499
16	1.961	255	255	255	3.551	27.096	3.801	499.971	100	64770	27	289	123.69	1.112	3.41817
41	1.613	255	255	255	61.636	32.632	3.863	411.393	100	53295	687	363	162.801	1.811	2.13308
58	1.521	255	255	255	66.912	36.449	3.964	387.773	100	50235	751	440	77.196	1.923	2.06136
139	1.142	255	255	255	66.295	75.113	4.065	291.322	100	37740	750	877	83.797	0.645	6.30233
94	1.274	255	255	255	54.892	50.066	4.232	324.784	100	42075	623	592	85.236	1.095	3.86484
66	4.886	251.777	0	255	58.204	39.779	5.345	1230.24	98.736	159375	640	474	25.301	2.715	1.96869
84	0.216	245.893	0	255	50.98	79.754	0.64	53.146	96.429	6885	580	904	105.945	0.527	1.21442
92	0.216	255	255	255	10.496	83.256	0.64	55.115	100	7140	118	951	74.055	0.439	1.45786
2	0.232	255	255	255	84.028	2.554	0.686	59.052	100	7650	954	26	129.806	0.527	1.30171
80	0.27	255	255	255	28.209	75.143	0.686	68.894	100	8925	319	852	129.806	0.527	1.30171
106	0.216	255	255	255	8.632	88.022	0.686	55.115	100	7140	95	1004	39.806	0.527	1.30171
50	0.224	255	255	255	44.04	40.65	0.708	57.083	100	7395	498	465	29.745	0.527	1.34345
85	0.316	255	255	255	17.704	79.929	0.708	80.704	100	10455	200	906	119.745	0.615	1.15122
105	0.309	255	255	255	38.607	87.709	0.708	78.736	100	10200	437	995	119.745	0.615	1.15122
62	0.324	255	255	255	64.292	53.646	0.751	82.672	100	10710	730	607	110.556	0.615	1.22114
66	0.324	255	255	255	18.31	60.369	0.751	82.672	100	10710	207	683	110.556	0.615	1.22114
7	0.309	255	255	255	81.208	5.408	0.756	78.736	100	10200	922	58	125.538	0.615	1.22927
41	0.208	255	255	255	50.459	37.111	0.756	53.146	100	6885	571	425	35.538	0.439	1.7221
98	0.255	255	255	255	11.269	84.966	0.756	64.957	100	8415	125	964	125.538	0.527	1.43454
12	0.278	255	255	255	88.471	11.627	0.786	70.862	100	9180	1005	136	63.435	0.527	1.49146
22	0.309	255	255	255	46.205	19.931	0.786	78.736	100	10200	524	231	63.435	0.527	1.49146
35	0.301	255	255	255	63.613	34.007	0.786	76.767	100	9945	720	389	26.565	0.527	1.49146
81	0.347	255	255	255	56.424	76.737	0.786	88.577	100	11475	638	875	26.565	0.615	1.27805
78	0.371	212.5	0	255	21.474	73.318	0.796	78.736	83.333	10200	244	830	96.34	0.703	1.13229
1	0.208	255	255	255	53.273	2.371	0.81	53.146	100	6885	603	24	130.601	0.435	1.86207
9	0.216	255	255	255	59.016	6.53	0.81	55.115	100	7140	670	70	102.529	0.351	2.30769
57	0.371	255	255	255	44.513	48.297	0.81	94.483	100	12240	506	554	77.471	0.615	1.31707
99	0.386	255	255	255	28.732	86.035	0.81	98.419	100	12750	324	983	40.601	0.703	1.1522
45	0.409	255	255	255	64.672	38.906	0.829	104.325	100	13515	732	445	32.005	0.703	1.17923
53	0.286	255	255	255	41.791	45.906	0.829	72.83	100	9435	474	527	57.995	0.527	1.57306
55	0.409	255	255	255	44.197	46.647	0.829	104.325	100	13515	501	535	57.995	0.703	1.17923
60	0.316	255	255	255	43.776	51.96	0.829	80.704	100	10455	494	590	147.995	0.615	1.34797
71	0.363	255	255	255	37.171	63.237	0.829	92.514	100	11985	419	723	32.005	0.615	1.34797
87	0.417	255	255	255	27.757	81.338	0.829	106.293	100	13770	312	923	147.995	0.703	1.17923
63	0.247	255	255	255	43.542	53.956	0.834	62.988	100	8160	491	616	18.435	0.482	1.73029
82	0.378	255	255	255	34.612	78.003	0.834	96.451	100	12495	393	883	108.435	0.695	1.2
3	0.224	255	255	255	76.09	2.625	0.865	57.083	100	7395	861	28	156.038	0.351	2.46439
21	0.239	255	255	255	64.266	18.914	0.865	61.02	100	7905	729	220	66.038	0.439	1.97039
90	0.201	255	255	255	22.428	82.817	0.865	51.178	100	6630	251	940	156.038	0.405	2.1358
25	0.255	255	255	255	59.713	21.194	0.879	64.957	100	8415	676	237	126.87	0.497	1.76861
33	0.463	255	255	255	56.265	33.011	0.905	118.103	100	15300	636	378	29.055	0.703	1.28734
54	0.425	255	255	255	31.323	46.422	0.905	108.261	100	14025	354	533	60.945	0.615	1.47154
107	0.502	255	255	255	33.794	88.57	0.905	127.945	100	16575	380	1010	29.055	0.791	1.14412
37	0.486	255	255	255	54.395	35.146	0.917	124.008	100	16065	618	405	73.301	0.703	1.30441
39	0.27	255	255	255	60.566	36.355	0.917	68.894	100	8925	685	416	16.699	0.439	2.08884
4	0.239	255	255	255	79.446	3.23	0.934	61.02	100	7905	901	33	131.186	0.471	1.98301
38	0.232	255	255	255	62.916	35.723	0.934	59.052	100	7650	711	409	41.186	0.506	1.84585
14	0.301	255	255	255	60.241	12.531	0.946	76.767	100	9945	681	144	21.801	0.551	1.71688
43	0.27	255	255	255	49.255	38.132	0.946	68.894	100	8925	559	439	68.199	0.434	2.17972
30	0.239	255	255	255	51.991	22.156	0.95	61.02	100	7905	587	256	33.69	0.474	2.00422
86	0.463	255	255	255	15.122	81.157	0.95	118.103	100	15300	169	928	56.31	0.703	1.35135
11	0.394	255	255	255	58.622	10.74	0.982	100.388	100	13005	665	117	116.565	0.615	1.59675
20	0.401	255	255	255	58.639	17.399	0.982	102.356	100	13260	662	200	26.565	0.786	1.24936
52	0.563	255	255	255	44.177	44.077	1.002	143.692	100	18615	502	496	105.255	0.791	1.26675
56	0.401	255	255	255	45.234	47.08	1.002	102.356	100	13260	511	540	52.125	0.703	1.42532
18	0.618	255	255	255	61.515	15.09	1.025	157.471	100	20400	695	169	149.036	0.879	1.1661
23	0.347	255	255	255	58.636	20.363	1.028	88.577	100	11475	662	234	19.983	0.477	2.15514
24	0.255	255	255	255	63.478	21	1.028	64.957	100	8415	721	233	109.983	0.439	2.34169
68	0.494	251.016	0	255	33.112	61.071	1.028	124.008	98.438	16065	372	698	19.983	0.767	1.34029
51	0.309	255	255	255	48.641	42.55	1.058	78.736	100	10200	549	488	41.634	0.653	1.62021
8	0.278	255	255	255	81.596	6.162	1.062	70.862	100	9180	924	73	24.444	0.439	2.41913
88	0.425	255	255	255	50.951	81.74	1.069	108.261	100	14025	574	931	9.462	0.578	1.84948
27	0.309	255	255	255	53.291	21.583	1.072	78.736	100	10200	602	250	34.992	0.55	1.94909
77	0.656	237	0	255	22.328	72.236	1.072	155.503	92.941	20145	249	819	145.008	0.879	1.21957
13	0.679	255	255	255	62.543	12.51	1.087	173.218	100	22440	710	148	75.964	0.919	1.18281
59	0.695	255	255	255	60.519	51.872	1.101	177.155	100	22950	686	596	61.39	0.914	1.2046
93	0.571	255	255	255	37.294	83.631	1.101	145.661	100	18870	421	946	118.61	0.825	1.33455
6	0.502	255	255	255	47.79	4.273	1.111	127.945	100	16575	538	51	18.435	0.615	1.8065
48	0.455	255	255	255	48.503	40.404	1.111	116.135	100	15045	546	463	18.435	0.768	1.44661
58	0.239	255	255	255	40.382	49.14	1.125	61.02	100	7905	456	564	51.34	0.373	3.01609
79	0.563	255	255	255	20.502	74.476	1.142	143.692	100	18615	228	850	22.62	0.703	1.62447
100	0.332	255	255	255	32.3	86.146	1.146	84.641	100	10965	362	984	32.471	0.556	2.06115
104	0.371	255	255	255	63.383	87.791	1.146	94.483	100	12240	718	994	122.471	0.501	2.28743
103	0.702	255	255	255	34.563	87.909	1.172	179.123	100	23205	392	1007	77.005	0.791	1.48167
46	0.201	255	255	255	48.988	39.543	1.179	51.178	100	6630	555	444	116.565	0.329	3.58359
36	0.378	255	255	255	49.63	34.44	1.182	96.451	100	12495	559	396	41.987	0.814	1.45209
95	0.262	255	255	255	12.331	84.505	1.182	66.925	100	8670	136	958	131.987	0.55	2.14909
5	0.563	255	255	255	84.917	4.202	1.195	143.692	100	18615	964	42	107.103	0.703	1.69986
10	0.494	247.031	0	255	83.478	7.84	1.195	122.04	96.875	15810	947	83	107.103	0.75	1.59333
26	0.332	255	255	255	49.506	21.708	1.195	84.641	100	10965	560	241	126.027	0.457	2.61488
61	0.355	255	255	255	59.461	53.132	1.195	90.546	100	11730	676	598	107.103	0.431	2.77262
96	0.679	255	255	255	29.712	84.772	1.195	173.218	100	22440	333	969	36.027	0.87	1.37356
65	0.293	255	255	255	19.791	59.538	1.224	74.799	100	9690	223	684	68.962	0.438	2.79452
72	0.695	255	255	255	46.985	65.061	1.243	177.155	100	22950	527	739	171.87	0.932	1.33369
94	0.293	255	255	255	1.487	83.921	1.306	74.799	100	9690	9	953	160.346	0.407	3.20885
49	0.332	255	255	255	49.709	40.77	1.372	84.641	100	10965	560	458	129.806	0.486	2.82305
19	0.625	255	255	255	60.007	15.587	1.462	159.439	100	20655	679	169	122.735	0.785	1.86242
29	0.602	255	255	255	41.83	21.693	1.517	153.534	100	19890	467	248	10.008	0.527	2.87856
34	0.455	255	255	255	61.453	34.532	1.517	116.135	100	15045	699	384	100.008	0.487	3.11499
47	0.455	255	255	255	46.917	39.701	1.584	116.135	100	15045	526	458	33.69	0.558	2.83871
83	0.587	255	255	255	15.223	80.029	1.634	149.598	100	19380	167	904	143.746	0.722	2.26316
102	0.587	255	255	255	61.38	87.451	1.634	149.598	100	19380	691	989	143.746	0.559	2.92308
64	0.888	255	255	255	19.665	57.709	1.641	226.365	100	29325	224	668	74.476	1.061	1.54665
89	0.563	255	255	255	53.765	82.767	1.641	143.692	100	18615	607	950	74.476	0.702	2.33761
97	0.255	255	255	255	5.156	85.243	1.688	64.957	100	8415	53	964	128.66	0.34	4.96471
40	0.425	255	255	255	48.555	37.013	1.751	108.261	100	14025	551	431	72.474	0.469	3.73348
69	0.548	255	255	255	42.314	62.174	1.768	139.756	100	18105	473	705	153.435	0.746	2.36997
101	0.625	255	255	255	31.059	87.561	1.777	159.439	100	20655	351	989	98.531	0.703	2.52774
16	0.54	255	255	255	60.506	14.106	1.779	137.787	100	17850	685	150	110.225	0.528	3.36932
91	0.316	255	255	255	3.593	83.422	1.853	80.704	100	10455	37	941	121.43	0.413	4.48668
28	0.672	255	255	255	61.817	21.978	1.929	171.25	100	22185	693	254	30.069	0.71	2.7169
15	1.142	255	255	255	59.264	13.153	1.941	291.322	100	37740	671	140	95.194	1.136	1.70863
76	0.849	255	255	255	15.464	71.952	1.945	216.523	100	28050	172	830	71.565	0.682	2.85191
42	1.05	255	255	255	62.142	38.108	1.965	267.701	100	34680	695	434	169.695	0.965	2.03627
70	1.582	255	255	255	41.392	63.276	2.028	403.52	100	52275	461	716	162.35	1.236	1.64078
73	0.803	255	255	255	43.566	65.432	2.051	204.712	100	26520	485	748	9.866	0.966	2.12319
67	0.494	255	255	255	36.735	61.5	2.161	125.977	100	16320	413	689	116.565	0.504	4.2877
32	1.636	255	255	255	54.169	23.539	2.252	417.298	100	54060	603	263	159.444	1.318	1.70865
75	1.042	255	255	255	58.018	69.763	2.487	265.732	100	34425	651	807	57.995	1.152	2.15885
17	0.888	255	255	255	63.188	14.899	2.612	226.365	100	29325	714	184	70.346	1.064	2.45489
31	0.934	255	255	255	59.403	23.273	2.695	238.175	100	30855	674	280	70.974	0.884	3.04864
74	1.22	255	255	255	38.756	69.054	2.759	311.005	100	40290	436	770	99.162	1.218	2.26519
44	2.902	255	255	255	52.285	39.492	4.617	740.114	100	95880	571	457	21.194	2.121	2.1768
119	0.201	255	255	255	26.446	60.754	0.589	51.178	100	6630	298	690	153.435	0.439	1.34169
187	0.201	255	255	255	11.29	84.696	0.589	51.178	100	6630	127	961	116.565	0.439	1.34169
36	0.232	255	255	255	61.689	21.689	0.634	59.052	100	7650	700	244	123.69	0.527	1.20304
56	0.216	255	255	255	73.61	28.764	0.634	55.115	100	7140	835	330	56.31	0.527	1.20304
114	0.216	255	255	255	25.906	59.22	0.634	55.115	100	7140	292	676	33.69	0.527	1.20304
109	0.278	255	255	255	37.391	57.594	0.669	70.862	100	9180	424	652	113.199	0.615	1.0878
123	0.255	255	255	255	24.951	63.795	0.669	64.957	100	8415	283	730	66.801	0.527	1.26945
134	0.262	255	255	255	69.992	69.109	0.669	66.925	100	8670	795	783	113.199	0.615	1.0878
136	0.239	255	255	255	27.719	70.595	0.669	61.02	100	7905	312	802	156.801	0.439	1.52392
150	0.216	255	255	255	87.815	74.099	0.669	55.115	100	7140	996	842	156.801	0.497	1.34608
11	0.201	255	255	255	62.66	17.42	0.708	51.178	100	6630	711	202	60.255	0.439	1.61276
39	0.232	255	255	255	73.186	21.889	0.708	59.052	100	7650	832	253	60.255	0.511	1.38552
45	0.293	255	255	255	55.654	22.631	0.708	74.799	100	9690	631	261	60.255	0.615	1.15122
55	0.301	255	255	255	58.434	28.686	0.708	76.767	100	9945	663	323	119.745	0.615	1.15122
73	0.262	255	255	255	68.116	41.953	0.708	66.925	100	8670	773	481	60.255	0.559	1.26655
103	0.224	255	255	255	17.655	55.683	0.708	57.083	100	7395	199	630	119.745	0.497	1.42455
125	0.216	255	255	255	88.392	65.314	0.708	55.115	100	7140	1004	740	119.745	0.5	1.416
183	0.293	255	255	255	74.68	83.334	0.708	74.799	100	9690	848	945	119.745	0.527	1.34345
57	0.262	255	255	255	70.832	30.203	0.725	66.925	100	8670	805	340	104.036	0.527	1.37571
197	0.278	255	255	255	13.406	89.736	0.746	70.862	100	9180	149	1024	45	0.527	1.41556
2	0.232	255	255	255	74.197	13.331	0.751	59.052	100	7650	843	156	69.444	0.497	1.51107
44	0.224	255	255	255	45.721	22.515	0.751	57.083	100	7395	519	252	110.556	0.439	1.71071
75	0.278	255	255	255	61.86	42.917	0.751	70.862	100	9180	703	484	110.556	0.527	1.42505
78	0.216	255	255	255	57.66	45.944	0.751	55.115	100	7140	654	519	110.556	0.527	1.42505
85	0.216	255	255	255	25.937	51.3	0.751	55.115	100	7140	291	585	20.556	0.351	2.1396
108	0.286	255	255	255	15.961	57.618	0.751	72.83	100	9435	180	660	69.444	0.527	1.42505
128	0.324	255	255	255	35.616	66.957	0.751	82.672	100	10710	404	758	110.556	0.615	1.22114
156	0.201	255	255	255	7.884	76.785	0.751	51.178	100	6630	86	872	159.444	0.351	2.1396
173	0.301	255	255	255	26.987	81.604	0.751	76.767	100	9945	303	930	20.556	0.615	1.22114
179	0.262	255	255	255	62.545	82.505	0.751	66.925	100	8670	708	938	159.444	0.559	1.34347
90	0.232	255	255	255	27.163	52.636	0.756	59.052	100	7650	306	602	35.538	0.497	1.52113
116	0.301	255	255	255	8.749	59.7	0.756	76.767	100	9945	96	677	144.462	0.615	1.22927
132	0.208	255	255	255	28.774	69.013	0.756	53.146	100	6885	325	789	54.462	0.432	1.75
139	0.309	255	255	255	81.748	71.831	0.756	78.736	100	10200	927	820	35.538	0.615	1.22927
148	0.255	255	255	255	8.63	74.034	0.756	64.957	100	8415	95	846	54.462	0.52	1.45385
158	0.293	255	255	255	86.996	77.226	0.756	74.799	100	9690	987	882	35.538	0.527	1.43454
175	0.286	255	255	255	83.125	81.757	0.756	72.83	100	9435	943	934	35.538	0.559	1.35242
190	0.286	255	255	255	14.089	85.26	0.756	72.83	100	9435	157	973	35.538	0.559	1.35242
122	0.332	255	255	255	84.701	63.088	0.786	84.641	100	10965	962	714	116.565	0.527	1.49146
172	0.278	255	255	255	80.737	81.196	0.786	70.862	100	9180	917	920	116.565	0.527	1.49146
1	0.371	255	255	255	37.444	12.564	0.829	94.483	100	12240	424	139	122.005	0.668	1.24102
19	0.355	255	255	255	55.968	18.681	0.829	90.546	100	11730	633	210	147.995	0.615	1.34797
97	0.386	255	255	255	12.379	54.761	0.829	98.419	100	12750	139	619	122.005	0.683	1.21376
105	0.278	255	255	255	39.48	56.754	0.829	70.862	100	9180	445	648	32.005	0.527	1.57306
115	0.293	255	255	255	41.201	59.335	0.829	74.799	100	9690	465	673	147.995	0.527	1.57306
120	0.394	255	255	255	37.148	60.892	0.829	100.388	100	13005	420	697	57.995	0.703	1.17923
144	0.417	255	255	255	10.348	72.921	0.829	106.293	100	13770	115	826	122.005	0.703	1.17923
159	0.394	255	255	255	15.655	78.028	0.829	100.388	100	13005	176	884	122.005	0.695	1.19281
169	0.286	255	255	255	14.975	80.9	0.829	72.83	100	9435	166	923	32.005	0.569	1.45694
189	0.371	255	255	255	13.012	85.258	0.829	94.483	100	12240	144	968	147.995	0.615	1.34797
193	0.316	255	255	255	86.632	86.615	0.829	80.704	100	10455	982	983	147.995	0.527	1.57306
195	0.347	255	255	255	14.49	88.516	0.829	88.577	100	11475	161	1010	32.005	0.615	1.34797
43	0.316	255	255	255	65.638	22.407	0.834	80.704	100	10455	746	250	108.435	0.527	1.58254
184	0.278	255	255	255	15.412	83.725	0.834	70.862	100	9180	174	948	108.435	0.439	1.89977
3	0.208	255	255	255	36.33	14.121	0.865	53.146	100	6885	409	163	23.962	0.384	2.2526
29	0.386	255	255	255	61.116	20.831	0.865	98.419	100	12750	691	235	156.038	0.683	1.26647
71	0.316	255	255	255	39.66	41.58	0.865	80.704	100	10455	450	478	66.038	0.527	1.64137
99	0.355	255	255	255	30.158	54.919	0.865	90.546	100	11730	339	622	156.038	0.615	1.4065
168	0.432	255	255	255	87.714	80.752	0.865	110.23	100	14280	994	917	156.038	0.703	1.23044
6	0.409	255	255	255	20.799	15.335	0.879	104.325	100	13515	233	178	36.87	0.703	1.25036
20	0.371	255	255	255	75.297	19.226	0.879	94.483	100	12240	855	223	53.13	0.664	1.3238
52	0.201	255	255	255	36.002	27.848	0.879	51.178	100	6630	406	314	143.13	0.435	2.02069
63	0.417	255	255	255	72.114	35.938	0.879	106.293	100	13770	818	405	126.87	0.703	1.25036
77	0.27	255	255	255	60.388	44.91	0.879	68.894	100	8925	683	514	36.87	0.511	1.72016
111	0.332	255	255	255	5.62	58.777	0.879	84.641	100	10965	61	665	126.87	0.589	1.49236
126	0.363	255	255	255	84.753	66.344	0.879	92.514	100	11985	962	751	126.87	0.589	1.49236
130	0.309	255	255	255	73.371	67.902	0.879	78.736	100	10200	831	770	143.13	0.589	1.49236
145	0.409	255	255	255	29.349	72.927	0.879	104.325	100	13515	330	833	36.87	0.703	1.25036
192	0.347	255	255	255	8.816	86.63	0.879	88.577	100	11475	97	982	126.87	0.611	1.43863
70	0.363	255	255	255	62.003	41.485	0.896	92.514	100	11985	701	472	168.69	0.615	1.45691
40	0.34	255	255	255	10.894	22.045	0.905	86.609	100	11220	119	254	29.055	0.668	1.35479
76	0.363	255	255	255	59.584	43.717	0.905	92.514	100	11985	676	493	119.055	0.609	1.48604
127	0.394	255	255	255	29.956	66.565	0.905	100.388	100	13005	338	753	119.055	0.683	1.32504
155	0.378	255	255	255	82.43	76.372	0.905	96.451	100	12495	936	874	60.945	0.615	1.47154
186	0.425	255	255	255	73.689	84.134	0.905	108.261	100	14025	834	955	150.945	0.683	1.32504
81	0.247	255	255	255	25.995	47.798	0.917	62.988	100	8160	291	543	163.301	0.351	2.61254
147	0.463	255	255	255	10.017	73.905	0.917	118.103	100	15300	109	843	16.699	0.703	1.30441
164	0.324	255	255	255	71.3	79.719	0.917	82.672	100	10710	810	903	106.699	0.615	1.49106
177	0.471	255	255	255	81.247	81.973	0.917	120.072	100	15555	920	935	16.699	0.703	1.30441
46	0.417	255	255	255	75.738	22.874	0.934	106.293	100	13770	858	264	41.186	0.668	1.3982
48	0.224	255	255	255	54.947	24.86	0.934	57.083	100	7395	621	287	41.186	0.435	2.14713
51	0.425	255	255	255	36.759	27.146	0.934	108.261	100	14025	415	313	48.814	0.615	1.5187
79	0.255	255	255	255	37.682	46.007	0.934	64.957	100	8415	425	528	41.186	0.435	2.14713
174	0.208	255	255	255	8.404	81.684	0.934	53.146	100	6885	92	934	48.814	0.373	2.50402
188	0.394	255	255	255	15.6	84.962	0.934	100.388	100	13005	174	963	131.186	0.658	1.41945
196	0.378	255	255	255	15.751	89.655	0.934	96.451	100	12495	176	1016	131.186	0.615	1.5187
59	0.471	242.459	0	255	35.141	30.468	0.946	114.167	95.082	14790	398	352	68.199	0.768	1.23177
149	0.286	255	255	255	71.134	74.187	0.946	72.83	100	9435	807	839	111.801	0.491	1.92668
162	0.448	255	255	255	81.527	78.718	0.946	114.167	100	14790	926	901	68.199	0.703	1.34566
176	0.533	255	255	255	18.874	81.967	0.946	135.819	100	17595	210	935	21.801	0.864	1.09491
41	0.232	255	255	255	64.298	22.041	0.95	59.052	100	7650	728	254	33.69	0.472	2.01271
93	0.463	255	255	255	14.772	53.339	0.982	118.103	100	15300	163	605	153.435	0.667	1.47226
38	0.425	255	255	255	68.363	22.084	1.002	108.261	100	14025	777	257	74.745	0.615	1.62927
107	0.262	255	255	255	29.756	57.442	1.002	66.925	100	8670	335	649	127.875	0.559	1.79249
160	0.401	255	255	255	6.834	78.526	1.002	102.356	100	13260	76	899	74.745	0.527	1.90133
181	0.255	255	255	255	20.776	83.198	1.002	64.957	100	8415	234	942	127.875	0.529	1.89414
17	0.432	255	255	255	74.608	18.443	1.025	110.23	100	14280	844	213	30.964	0.703	1.45804
131	0.355	255	255	255	72.795	68.585	1.025	90.546	100	11730	823	784	30.964	0.589	1.74024
151	0.509	255	255	255	2.531	74.679	1.025	129.914	100	16830	26	845	120.964	0.703	1.45804
182	0.618	255	255	255	23.803	83.349	1.025	157.471	100	20400	266	946	149.036	0.791	1.29583
25	0.355	255	255	255	67.39	20.45	1.028	90.546	100	11730	765	238	70.017	0.569	1.80668
82	0.27	255	255	255	30.21	49.679	1.028	68.894	100	8925	342	560	109.983	0.384	2.67708
185	0.602	255	255	255	9.775	84.196	1.028	153.534	100	19890	109	964	70.017	0.791	1.29962
80	0.278	255	255	255	34.602	47.114	1.058	70.862	100	9180	390	541	48.366	0.373	2.83646
138	0.502	255	255	255	71.769	71.622	1.062	127.945	100	16575	811	813	155.556	0.615	1.72683
21	0.409	250.189	0	255	21.405	19.474	1.072	102.356	98.113	13260	238	219	145.008	0.746	1.437
89	0.355	255	255	255	42.978	52.595	1.072	90.546	100	11730	484	602	34.992	0.5	2.144
95	0.301	255	255	255	13.811	53.793	1.111	76.767	100	9945	151	610	161.565	0.417	2.66427
146	0.347	255	255	255	85.603	73.931	1.111	88.577	100	11475	972	847	71.565	0.5	2.222
9	0.44	255	255	255	72.065	15.885	1.125	112.198	100	14535	815	185	38.66	0.589	1.91002
178	0.71	255	255	255	79.684	82.514	1.125	181.092	100	23460	903	934	128.66	0.879	1.27986
15	0.401	255	255	255	17.381	18.074	1.142	102.356	100	13260	192	208	22.62	0.49	2.33061
24	0.602	255	255	255	66.672	19.853	1.142	153.534	100	19890	757	220	112.62	0.853	1.3388
117	0.409	255	255	255	20.187	60.827	1.142	104.325	100	13515	228	699	67.38	0.527	2.16698
14	0.34	255	255	255	21.677	18.061	1.146	86.609	100	11220	241	210	32.471	0.528	2.17045
28	0.401	255	255	255	23.997	20.87	1.146	102.356	100	13260	269	243	57.529	0.559	2.05009
133	0.857	255	255	255	30.558	69.319	1.146	218.491	100	28305	342	792	32.471	1.054	1.08729
170	0.486	255	255	255	78.692	81.182	1.146	124.008	100	16065	892	929	57.529	0.621	1.84541
102	0.756	255	255	255	39.495	55.682	1.172	192.902	100	24990	443	635	12.995	0.879	1.33333
49	0.301	255	255	255	70.646	25.561	1.179	76.767	100	9945	798	295	26.565	0.6	1.965
137	0.309	255	255	255	89.087	71.64	1.179	78.736	100	10200	1011	822	63.435	0.471	2.50318
157	0.455	255	255	255	84.387	77.04	1.179	116.135	100	15045	953	874	153.435	0.703	1.6771
161	0.587	255	255	255	9.795	78.614	1.179	149.598	100	19380	108	901	63.435	0.76	1.55132
34	0.911	255	255	255	59.215	21.606	1.195	232.27	100	30090	669	241	126.027	1.054	1.13378
106	0.417	255	255	255	22.111	57.404	1.195	106.293	100	13770	248	648	126.027	0.652	1.83282
121	0.262	255	255	255	5.592	60.889	1.195	66.925	100	8670	57	696	17.103	0.408	2.92892
124	0.432	255	255	255	84.519	65.325	1.195	110.23	100	14280	957	738	126.027	0.609	1.96223
154	0.571	255	255	255	20.665	75.179	1.195	145.661	100	18870	232	861	53.973	0.746	1.60188
165	0.525	255	255	255	8.266	79.923	1.195	133.85	100	17340	89	906	143.973	0.746	1.60188
35	0.602	255	255	255	21.48	21.98	1.221	153.534	100	19890	240	256	59.744	0.791	1.54362
92	0.486	255	255	255	30.852	53.187	1.221	124.008	100	16065	345	609	30.256	0.589	2.07301
7	0.455	255	255	255	70.492	15.797	1.224	116.135	100	15045	799	186	68.962	0.583	2.09949
143	0.756	255	255	255	84.699	73.048	1.224	192.902	100	24990	962	838	68.962	0.879	1.39249
67	0.787	255	255	255	67.873	39.801	1.249	200.776	100	26010	767	458	39.289	0.904	1.38164
61	0.865	255	255	255	22.45	34.558	1.258	220.46	100	28560	252	399	65.225	1.054	1.19355
153	0.633	255	255	255	86.191	75.231	1.267	161.408	100	20910	977	849	123.69	0.829	1.52835
30	0.425	255	255	255	67.954	21.103	1.279	108.261	100	14025	771	247	74.055	0.527	2.42694
113	0.34	255	255	255	29.323	59.253	1.306	86.609	100	11220	331	681	70.346	0.419	3.11695
135	0.517	255	255	255	68.969	70.175	1.306	131.882	100	17085	782	793	132.274	0.746	1.75067
166	0.517	255	255	255	17.02	80.162	1.306	131.882	100	17085	192	919	70.346	0.615	2.12358
171	0.247	255	255	255	9.159	81.36	1.318	62.988	100	8160	99	920	126.87	0.715	1.84336
26	0.811	255	255	255	58.913	20.542	1.338	206.681	100	26775	664	237	23.199	0.879	1.52218
8	0.425	255	255	255	25.86	15.884	1.341	108.261	100	14025	290	188	58.392	0.527	2.54459
87	0.293	255	255	255	65.732	51.881	1.364	74.799	100	9690	740	592	14.931	0.371	3.67655
129	0.378	255	255	255	68.122	67.604	1.364	96.451	100	12495	768	771	14.931	0.439	3.10706
140	0.386	255	255	255	30.489	72.383	1.364	98.419	100	12750	345	831	75.069	0.435	3.13563
112	0.872	255	255	255	36.596	59.089	1.372	222.428	100	28815	410	669	140.194	0.95	1.44421
33	0.872	255	255	255	56.646	21.544	1.389	222.428	100	28815	638	247	18.435	0.966	1.43789
66	1.212	255	255	255	70.425	39.205	1.389	309.037	100	40035	798	439	108.435	1.142	1.21629
72	0.919	255	255	255	60.303	42.042	1.389	234.238	100	30345	681	485	55.305	0.994	1.39738
180	0.826	255	255	255	11.3	83.312	1.389	210.618	100	27285	122	944	161.565	0.982	1.41446
18	1.081	255	255	255	61.2	18.896	1.441	275.574	100	35700	690	220	37.569	1.024	1.40723
142	0.44	255	255	255	87.707	72.779	1.462	112.198	100	14535	991	834	32.735	0.538	2.71747
47	0.687	255	255	255	68.332	23.324	1.473	175.187	100	22695	778	258	107.354	0.895	1.64581
163	0.872	255	255	255	86.563	79.525	1.473	222.428	100	28815	978	903	162.646	1.014	1.45266
54	0.602	255	255	255	8.873	29.184	1.504	153.534	100	19890	100	340	83.29	0.758	1.98417
69	0.563	255	255	255	67.195	41.398	1.512	143.692	100	18615	756	476	35.538	0.746	2.02681
86	0.594	255	255	255	20.237	51.986	1.512	151.566	100	19635	224	587	144.462	0.734	2.05995
118	0.425	255	255	255	13.911	60.829	1.557	108.261	100	14025	150	690	163.61	0.577	2.69844
5	0.849	255	255	255	79.135	15.251	1.564	216.523	100	28050	894	179	38.157	0.858	1.82284
32	0.996	255	255	255	74.923	21.673	1.564	253.922	100	32895	848	255	51.843	1.054	1.48387
152	0.888	255	255	255	84.174	75.044	1.651	226.365	100	29325	950	852	154.799	1.002	1.6477
96	0.633	255	255	255	25.925	54.262	1.809	161.408	100	20910	290	628	60.945	0.741	2.4413
13	0.973	255	255	255	57.373	18.088	1.828	248.017	100	32130	648	214	54.782	0.808	2.26238
104	0.625	255	255	255	13.914	56.383	1.847	159.439	100	20655	147	638	154.654	0.637	2.89953
16	1.166	255	255	255	23.516	18.671	1.853	297.227	100	38505	260	218	31.43	1.274	1.45447
60	0.525	255	255	255	72.773	32.262	1.878	133.85	100	17340	818	367	169.216	0.524	3.58397
191	0.618	255	255	255	29.069	86.126	1.878	157.471	100	20400	320	981	10.784	0.594	3.16162
194	1.281	255	255	255	10.409	87.924	1.893	326.753	100	42330	114	990	111.801	1.12	1.69018
88	1.459	255	255	255	24.849	52.305	1.897	372.025	100	48195	273	599	13.392	1.078	1.75974
68	0.803	255	255	255	59.535	40.515	1.935	204.712	100	26520	669	469	39.472	0.63	3.07143
64	1.752	255	255	255	70.07	37.671	1.951	446.824	100	57885	792	438	54.162	1.327	1.47023
167	1.065	255	255	255	84.181	81.037	1.974	271.638	100	35190	951	932	69.146	0.945	2.08889
12	0.71	255	255	255	25.385	18.15	1.988	181.092	100	23460	284	197	135	1.036	1.91892
4	0.741	255	255	255	27.364	14.798	1.992	188.965	100	24480	304	177	48.576	0.562	3.54448
141	0.934	255	255	255	86.368	72.611	2.007	238.175	100	30855	972	832	23.199	0.788	2.54695
42	0.919	255	255	255	59.685	22.695	2.023	234.238	100	30345	671	265	34.38	0.831	2.43442
84	0.741	255	255	255	23.988	51.385	2.038	188.965	100	24480	263	583	172.569	0.703	2.899
10	0.973	255	255	255	16.851	16.57	2.112	248.017	100	32130	181	192	16.928	0.672	3.14286
53	0.656	255	255	255	71.753	28.702	2.138	167.313	100	21675	814	315	99.462	0.527	4.05693
50	1.266	255	255	255	15.584	26.935	2.182	322.816	100	41820	170	297	139.899	1.156	1.88754
65	1.374	255	255	255	56.428	39.742	2.245	350.373	100	45390	635	439	120.579	1.494	1.50268
110	1.683	247.982	0	255	21.348	59.12	2.281	417.298	97.248	54060	230	674	15.642	1.553	1.46877
23	1.351	253.543	0	255	26.299	19.95	2.291	342.5	99.429	44370	287	235	32.471	1.299	1.76366
83	0.563	255	255	255	36.473	50.492	2.299	143.692	100	18615	405	583	46.548	0.694	3.31268
74	1.173	255	255	255	57.815	43.806	2.474	299.195	100	38760	656	484	96.116	0.939	2.63472
62	1.027	255	255	255	54.446	35.796	2.746	261.796	100	33915	619	395	97.352	0.945	2.90582
100	2.239	255	255	255	23.806	56.09	2.807	570.833	100	73950	255	632	159.864	1.992	1.40914
94	0.903	255	255	255	11.358	53.501	2.947	230.301	100	29835	112	605	169.695	0.799	3.68836
98	1.513	255	255	255	27.514	55.1	2.992	385.804	100	49980	297	626	3.366	0.879	3.40387
27	1.405	255	255	255	19.219	21.257	3.005	358.247	100	46410	204	254	37.875	1.229	2.44508
37	2.401	255	255	255	15.942	23.074	3.019	612.169	100	79305	181	280	81.634	2.181	1.38423
91	1.328	255	255	255	34.546	53.571	3.146	338.563	100	43860	380	601	144.09	1.067	2.94845
58	1.961	255	255	255	71.212	31.597	3.969	499.971	100	64770	801	381	62.301	1.177	3.37213
22	5.519	255	255	255	64.835	20.74	4.993	1407.4	100	182325	717	221	151.631	2.797	1.78513
101	2.601	255	255	255	17.586	58.058	5.029	663.347	100	85935	188	679	62.987	1.967	2.55669
5	0.201	255	255	255	45.768	11.188	0.634	51.178	100	6630	518	125	146.31	0.527	1.20304
34	0.247	255	255	255	26.709	29.696	0.634	62.988	100	8160	302	335	123.69	0.527	1.20304
42	0.232	255	255	255	34.877	69.157	0.634	59.052	100	7650	394	785	146.31	0.527	1.20304
66	0.232	255	255	255	45.499	74.844	0.634	59.052	100	7650	515	854	33.69	0.527	1.20304
38	0.239	255	255	255	68.767	60.817	0.669	61.02	100	7905	779	691	156.801	0.527	1.26945
32	0.262	255	255	255	35.066	28.332	0.686	66.925	100	8670	396	325	39.806	0.527	1.30171
53	0.27	255	255	255	40.323	72.623	0.686	68.894	100	8925	456	824	140.194	0.527	1.30171
80	0.262	255	255	255	55.044	83.378	0.708	66.925	100	8670	623	951	29.745	0.527	1.34345
15	0.255	255	255	255	41.119	15.566	0.751	64.957	100	8415	466	181	69.444	0.527	1.42505
26	0.201	255	255	255	55.834	21.549	0.751	51.178	100	6630	631	244	159.444	0.439	1.71071
10	0.34	255	255	255	40.255	14.211	0.756	86.609	100	11220	455	165	35.538	0.615	1.22927
18	0.278	255	255	255	55.18	16.957	0.756	70.862	100	9180	625	190	125.538	0.527	1.43454
20	0.27	255	255	255	41.177	17.724	0.756	68.894	100	8925	465	199	144.462	0.527	1.43454
30	0.27	255	255	255	54.496	24.039	0.756	68.894	100	8925	618	270	125.538	0.55	1.37455
47	0.27	255	255	255	45.781	71.041	0.756	68.894	100	8925	519	805	125.538	0.527	1.43454
76	0.286	248.108	0	255	61.671	79.601	0.756	70.862	97.297	9180	699	909	35.538	0.527	1.43454
83	0.324	212.5	0	255	89.12	86.65	0.756	68.894	83.333	8925	1011	989	35.538	0.615	1.22927
46	0.239	230.323	0	255	46.89	70.762	0.786	55.115	90.323	7140	530	803	153.435	0.511	1.53816
72	0.324	255	255	255	54.602	76.816	0.786	82.672	100	10710	620	870	116.565	0.615	1.27805
31	0.27	255	255	255	38.102	25.874	0.796	68.894	100	8925	429	294	173.66	0.439	1.81321
14	0.324	255	255	255	40.4	15.31	0.865	82.672	100	10710	454	173	156.038	0.681	1.27019
39	0.293	255	255	255	81.138	66.773	0.865	74.799	100	9690	919	762	23.962	0.511	1.69276
70	0.247	255	255	255	42.068	75.894	0.865	62.988	100	8160	474	865	23.962	0.527	1.64137
22	0.278	255	255	255	39.986	18.282	0.879	70.862	100	9180	451	211	36.87	0.511	1.72016
43	0.286	255	255	255	57.012	70.203	0.879	72.83	100	9435	645	802	36.87	0.497	1.76861
40	0.324	255	255	255	41.114	67.812	0.896	82.672	100	10710	463	771	168.69	0.527	1.70019
13	0.401	255	255	255	49.336	14.721	0.905	102.356	100	13260	557	170	29.055	0.615	1.47154
35	0.471	255	255	255	52.87	54.724	0.905	120.072	100	15555	600	618	119.055	0.786	1.1514
9	0.432	255	255	255	45.489	12.898	0.917	110.23	100	14280	513	148	16.699	0.703	1.30441
37	0.455	255	255	255	65.126	60.279	0.946	116.135	100	15045	739	691	68.199	0.703	1.34566
60	0.347	255	255	255	46.791	74.003	0.946	88.577	100	11475	527	840	158.199	0.596	1.58725
6	0.201	255	255	255	52.769	11.151	0.95	51.178	100	6630	596	130	33.69	0.387	2.45478
29	0.347	249.333	0	255	36.542	23.073	0.95	86.609	97.778	11220	411	266	33.69	0.615	1.54472
84	0.355	255	255	255	57.479	87.219	0.95	90.546	100	11730	650	990	146.31	0.615	1.54472
41	0.54	255	255	255	70.75	68.216	1.002	137.787	100	17850	800	778	15.255	0.786	1.27481
44	0.61	255	255	255	42.492	70.367	1.002	155.503	100	20145	479	804	37.875	0.879	1.13993
52	0.286	255	255	255	49.772	72.729	1.002	72.83	100	9435	566	833	74.745	0.435	2.30345
57	0.309	255	255	255	57.075	73.081	1.002	78.736	100	10200	644	829	142.125	0.596	1.68121
45	0.309	255	255	255	52.799	70.518	1.025	78.736	100	10200	596	800	149.036	0.471	2.17622
63	0.587	251.645	0	255	65.581	74.627	1.025	147.629	98.684	19125	741	852	30.964	0.851	1.20447
11	0.687	255	255	255	41.278	14.372	1.028	175.187	100	22695	468	158	109.983	0.879	1.16951
19	0.378	255	255	255	37.723	17.363	1.028	96.451	100	12495	424	196	160.017	0.55	1.86909
17	0.201	255	255	255	42.25	16.463	1.058	51.178	100	6630	477	193	48.366	0.505	2.09505
81	0.409	255	255	255	87.059	85.106	1.087	104.325	100	13515	985	969	14.036	0.611	1.77905
21	0.641	255	255	255	36.082	18.248	1.111	163.376	100	21165	405	211	18.435	0.932	1.19206
51	0.293	255	255	255	58.759	72.333	1.118	74.799	100	9690	665	819	135	0.621	1.80032
71	0.448	255	255	255	53.335	76.611	1.125	114.167	100	14790	601	869	141.34	0.668	1.68413
50	0.656	255	255	255	54.167	71.829	1.172	167.313	100	21675	610	816	167.005	0.775	1.51226
55	0.394	255	255	255	72.26	72.955	1.195	100.388	100	13005	816	832	17.103	0.439	2.7221
59	0.587	248.289	0	255	40.725	73.525	1.224	145.661	97.368	18870	457	834	158.962	0.703	1.74111
65	0.479	255	255	255	57.796	74.74	1.224	122.04	100	15810	652	849	158.962	0.615	1.99024
68	0.448	255	255	255	51.484	75.802	1.258	114.167	100	14790	585	856	114.775	0.944	1.33263
77	0.479	255	255	255	63.644	80.486	1.297	122.04	100	15810	721	909	118.301	0.587	2.20954
28	0.733	244.263	0	255	40.689	22.844	1.318	179.123	95.789	23205	458	255	126.87	0.883	1.49264
48	0.517	255	255	255	61.162	71.401	1.318	131.882	100	17085	691	807	126.87	0.559	2.35778
33	0.594	255	255	255	33.993	29.238	1.33	151.566	100	19635	378	334	172.405	1.142	1.16462
73	0.494	255	255	255	57.94	77.006	1.375	125.977	100	16320	653	880	26.565	0.829	1.65862
36	1.15	255	255	255	50.04	55.887	1.389	293.29	100	37995	563	632	145.305	1.139	1.21949
67	0.455	255	255	255	59.326	74.928	1.389	116.135	100	15045	666	856	18.435	0.615	2.25854
49	0.548	255	255	255	41.778	71.873	1.449	139.756	100	18105	466	817	165.964	0.8	1.81125
74	0.378	255	255	255	51.115	78.801	1.449	96.451	100	12495	580	904	75.964	0.746	1.94236
16	0.394	255	255	255	43.96	16.046	1.496	100.388	100	13005	493	177	139.764	0.54	2.77037
23	0.332	255	255	255	44.102	19.655	1.496	84.641	100	10965	496	219	139.764	0.487	3.07187
27	0.533	255	255	255	34.449	22.151	1.534	135.819	100	17595	386	250	166.759	0.764	2.00785
87	0.363	255	255	255	60.848	88.789	1.584	92.514	100	11985	692	1002	93.18	0.264	6
82	0.54	255	255	255	81.118	86.914	1.62	137.787	100	17850	916	996	40.601	0.559	2.89803
2	0.301	255	255	255	39.934	9.379	1.634	76.767	100	9945	449	99	126.254	0.366	4.46448
1	0.44	255	255	255	43.215	8.958	1.658	112.198	100	14535	484	107	32.005	0.474	3.49789
79	0.695	255	255	255	58.795	83.177	1.706	177.155	100	22950	661	946	11.889	1.021	1.67091
54	0.98	255	255	255	41.948	73.145	1.792	249.985	100	32385	468	830	168.69	0.901	1.9889
8	0.656	246	0	255	40.965	12.472	1.809	161.408	96.471	20910	456	136	150.945	0.819	2.20879
56	0.741	255	255	255	55.83	73.506	1.811	188.965	100	24480	627	829	140.906	0.721	2.51179
3	0.425	255	255	255	37.949	10.68	1.853	108.261	100	14025	422	116	148.57	0.456	4.0636
4	0.494	255	255	255	39.987	11.15	1.992	125.977	100	16320	446	132	41.424	0.81	2.45926
7	1.003	255	255	255	37.066	11.678	2.007	255.891	100	33150	411	130	156.801	0.953	2.10598
24	0.34	255	255	255	45.231	20.571	2.007	86.609	100	11220	512	245	66.801	0.538	3.73048
62	0.525	255	255	255	12.968	75.002	2.051	133.85	100	17340	145	843	99.866	0.405	5.0642
25	0.672	255	255	255	37.862	21.686	2.096	171.25	100	22185	425	254	33.024	1.111	1.88659
86	0.803	255	255	255	8.38	89.016	2.441	204.712	100	26520	89	1000	120.256	0.511	4.77691
85	0.471	255	255	255	6.158	88.61	2.572	120.072	100	15555	68	995	97.853	0.305	8.43279
58	1.088	255	255	255	58.813	73.631	2.612	277.543	100	35955	656	831	160.346	0.966	2.70393
78	1.791	229.72	0	255	58.402	81.259	2.656	411.393	90.086	53295	649	918	145.784	1.525	1.74164
64	1.737	255	255	255	43.03	75.41	2.973	442.887	100	57375	473	849	145.84	1.055	2.81801
75	1.907	248.806	0	255	53.437	78.752	3.28	474.382	97.571	61455	591	889	159.624	1.127	2.91038
12	2.362	248.333	0	255	46.786	15.748	3.452	586.58	97.386	75990	526	160	104.744	1.502	2.29827
69	4.006	255	255	255	49.091	76.861	4.309	1021.59	100	132345	530	870	163.413	2.032	2.12057
61	2.439	251.772	0	255	61.74	76.231	4.664	614.137	98.734	79560	703	842	93.24	1.205	3.87054
69	0.208	255	255	255	71.509	44.611	0.589	53.146	100	6885	812	505	116.565	0.527	1.11765
123	0.201	255	255	255	47.059	71.825	0.621	51.178	100	6630	533	815	135	0.439	1.41458
124	0.208	255	255	255	60.383	71.938	0.621	53.146	100	6885	685	816	135	0.527	1.17837
18	0.208	255	255	255	63.006	20.72	0.634	53.146	100	6885	714	234	146.31	0.527	1.20304
53	0.216	255	255	255	24.058	38.212	0.634	55.115	100	7140	271	437	33.69	0.527	1.20304
61	0.247	255	255	255	26.709	41.645	0.634	62.988	100	8160	302	471	123.69	0.527	1.20304
74	0.232	255	255	255	53.357	45.613	0.634	59.052	100	7650	606	516	123.69	0.527	1.20304
155	0.224	255	255	255	67.935	89.624	0.634	57.083	100	7395	771	1023	56.31	0.527	1.20304
116	0.224	255	255	255	60.676	69.146	0.64	57.083	100	7395	687	788	15.945	0.527	1.21442
140	0.224	255	255	255	66.029	81.262	0.64	57.083	100	7395	748	924	164.055	0.527	1.21442
126	0.262	255	255	255	50.361	74.065	0.669	66.925	100	8670	570	841	156.801	0.527	1.26945
55	0.201	255	255	255	15.75	39.618	0.686	51.178	100	6630	177	448	129.806	0.435	1.57701
87	0.232	255	255	255	75.544	52.185	0.686	59.052	100	7650	857	591	129.806	0.527	1.30171
137	0.27	255	255	255	58.114	78.999	0.686	68.894	100	8925	659	896	129.806	0.527	1.30171
138	0.224	255	255	255	59.509	79.141	0.686	57.083	100	7395	674	903	39.806	0.527	1.30171
28	0.278	255	255	255	51.056	25.711	0.708	70.862	100	9180	579	296	60.255	0.527	1.34345
35	0.27	255	255	255	62.112	27.785	0.708	68.894	100	8925	703	316	172.875	0.527	1.34345
45	0.301	255	255	255	49.515	33.496	0.708	76.767	100	9945	560	379	150.255	0.615	1.15122
51	0.27	255	255	255	63.681	36.776	0.708	68.894	100	8925	723	415	119.745	0.527	1.34345
76	0.216	255	255	255	72.11	46.819	0.708	55.115	100	7140	817	535	29.745	0.497	1.42455
117	0.301	255	255	255	57.418	69.786	0.708	76.767	100	9945	651	791	119.745	0.615	1.15122
122	0.201	255	255	255	65.864	71.774	0.708	51.178	100	6630	747	814	119.745	0.497	1.42455
145	0.216	255	255	255	65.11	83.118	0.708	55.115	100	7140	738	949	60.255	0.487	1.4538
149	0.255	255	255	255	66.058	85.48	0.708	64.957	100	8415	749	976	60.255	0.527	1.34345
9	0.201	255	255	255	64.684	18.822	0.746	51.178	100	6630	733	217	45	0.471	1.58386
64	0.232	255	255	255	25.338	42.169	0.746	59.052	100	7650	286	483	45	0.527	1.41556
25	0.262	255	255	255	71.902	22.197	0.751	66.925	100	8670	814	254	20.556	0.439	1.71071
131	0.255	255	255	255	46.404	75.618	0.751	64.957	100	8415	524	859	159.444	0.527	1.42505
52	0.309	255	255	255	29.009	37.252	0.756	78.736	100	10200	327	421	144.462	0.527	1.43454
81	0.332	255	255	255	66.3	47.653	0.756	84.641	100	10965	752	539	125.538	0.615	1.22927
84	0.286	255	255	255	68.035	48.988	0.756	72.83	100	9435	772	554	125.538	0.559	1.35242
109	0.216	255	255	255	49.681	64.702	0.756	55.115	100	7140	562	734	144.462	0.439	1.7221
112	0.224	255	255	255	37.651	67.071	0.756	57.083	100	7395	426	767	54.462	0.471	1.6051
119	0.255	255	255	255	63.675	70.339	0.756	64.957	100	8415	723	797	125.538	0.559	1.35242
128	0.332	255	255	255	51.417	74.8	0.756	84.641	100	10965	582	854	35.538	0.615	1.22927
75	0.201	255	255	255	21.059	46.173	0.786	51.178	100	6630	238	530	63.435	0.412	1.90777
154	0.286	255	255	255	63.582	88.924	0.786	72.83	100	9435	722	1008	116.565	0.536	1.46642
26	0.286	255	255	255	45.88	24.293	0.81	72.83	100	9435	519	273	130.601	0.559	1.44902
50	0.324	255	255	255	6.891	36.608	0.81	82.672	100	10710	75	420	49.399	0.615	1.31707
58	0.355	255	255	255	23.722	41.074	0.81	90.546	100	11730	267	471	49.399	0.615	1.31707
79	0.355	255	255	255	16.155	47.73	0.81	90.546	100	11730	182	539	130.601	0.683	1.18594
139	0.239	255	255	255	62.115	79.93	0.81	61.02	100	7905	706	914	77.471	0.439	1.8451
100	0.355	255	255	255	47.157	61.077	0.829	90.546	100	11730	535	691	122.005	0.615	1.34797
104	0.239	255	255	255	74.766	61.914	0.829	61.02	100	7905	847	706	32.005	0.615	1.34797
143	0.301	255	255	255	65.963	82.061	0.829	76.767	100	9945	747	931	147.995	0.527	1.57306
7	0.224	255	255	255	70.073	18.691	0.834	57.083	100	7395	795	217	71.565	0.5	1.668
17	0.309	255	255	255	73.683	20.548	0.834	78.736	100	10200	834	234	161.565	0.667	1.25037
88	0.316	255	255	255	70.942	52.451	0.834	80.704	100	10455	805	601	71.565	0.597	1.39698
141	0.332	213.488	0	255	64.702	81.595	0.834	70.862	83.721	9180	736	924	108.435	0.611	1.36498
29	0.363	238.723	0	255	64.289	27.091	0.865	86.609	93.617	11220	730	313	66.038	0.615	1.4065
71	0.232	255	255	255	14.359	45.01	0.865	59.052	100	7650	161	517	66.038	0.439	1.97039
80	0.247	255	255	255	22.346	47.567	0.865	62.988	100	8160	250	543	23.962	0.439	1.97039
63	0.255	231.818	0	255	14.482	41.982	0.87	59.052	90.909	7650	161	481	45	0.482	1.80498
13	0.347	255	255	255	60.532	19.783	0.879	88.577	100	11475	685	222	143.13	0.597	1.47236
86	0.232	255	255	255	78.727	51.898	0.879	59.052	100	7650	893	594	53.13	0.497	1.76861
89	0.394	255	255	255	65.032	52.454	0.879	100.388	100	13005	737	593	143.13	0.682	1.28886
91	0.224	255	255	255	50.635	53.053	0.879	57.083	100	7395	573	608	53.13	0.373	2.35657
144	0.286	255	255	255	34.439	82.391	0.879	72.83	100	9435	388	934	143.13	0.538	1.63383
148	0.417	255	255	255	65.591	84.325	0.879	106.293	100	13770	743	956	143.13	0.703	1.25036
16	0.247	255	255	255	19.425	19.971	0.896	62.988	100	8160	220	222	101.31	0.5	1.792
78	0.293	255	255	255	65.425	47.31	0.896	74.799	100	9690	740	540	11.31	0.439	2.041
153	0.247	255	255	255	62.814	86.747	0.896	62.988	100	8160	709	987	168.69	0.439	2.041
44	0.316	255	255	255	33.362	33.535	0.917	80.704	100	10455	375	378	163.301	0.687	1.33479
92	0.232	255	255	255	72.34	53.565	0.917	59.052	100	7650	822	614	73.301	0.351	2.61254
99	0.386	255	255	255	68.026	58.523	0.917	98.419	100	12750	773	661	106.699	0.672	1.36458
121	0.232	255	255	255	29.72	70.879	0.917	59.052	100	7650	333	808	16.699	0.351	2.61254
5	0.347	255	255	255	9.665	18.145	0.934	88.577	100	11475	106	203	131.186	0.621	1.50403
31	0.34	255	255	255	33.348	27.522	0.934	86.609	100	11220	377	309	131.186	0.679	1.37555
49	0.216	255	255	255	22.391	36.148	0.934	55.115	100	7140	251	415	48.814	0.435	2.14713
22	0.316	255	255	255	16.506	21.469	0.946	80.704	100	10455	186	239	111.801	0.49	1.93061
72	0.286	255	255	255	24.784	45.628	0.946	72.83	100	9435	280	515	111.801	0.527	1.79507
41	0.309	255	255	255	53.537	32.198	0.95	78.736	100	10200	604	364	146.31	0.528	1.79924
94	0.332	255	255	255	67.801	54.308	0.95	84.641	100	10965	768	614	123.69	0.667	1.42429
97	0.316	255	255	255	66.705	56.672	0.95	80.704	100	10455	756	641	123.69	0.56	1.69643
146	0.463	255	255	255	68.347	83.338	0.95	118.103	100	15300	773	952	33.69	0.78	1.21795
11	0.525	255	255	255	71.867	19.397	0.982	133.85	100	17340	815	216	116.565	0.703	1.39687
32	0.463	255	255	255	3.513	27.718	0.982	118.103	100	15300	35	313	153.435	0.722	1.36011
103	0.27	255	255	255	78.723	61.871	0.982	68.894	100	8925	894	699	116.565	0.445	2.20674
106	0.363	255	255	255	68.587	63.155	0.982	92.514	100	11985	779	714	100.305	0.527	1.86338
108	0.27	255	255	255	67.946	64.271	0.982	68.894	100	8925	771	726	116.565	0.469	2.09382
130	0.618	255	255	255	56.837	75.754	0.982	157.471	100	20400	642	860	153.435	0.879	1.11718
133	0.309	255	255	255	67.906	76.4	0.982	78.736	100	10200	771	864	116.565	0.545	1.80183
3	0.378	255	255	255	20.289	15.864	1.002	96.451	100	12495	227	176	127.875	0.559	1.79249
15	0.293	255	255	255	70.336	19.81	1.002	74.799	100	9690	796	229	37.875	0.536	1.8694
56	0.618	255	255	255	72.657	39.784	1.002	157.471	100	20400	824	448	127.875	0.879	1.13993
57	0.533	255	255	255	20.604	39.915	1.002	135.819	100	17595	229	455	15.255	0.791	1.26675
82	0.486	255	255	255	72.732	48.52	1.002	124.008	100	16065	823	555	37.875	0.791	1.26675
90	0.278	255	255	255	59.097	52.425	1.002	70.862	100	9180	667	598	15.255	0.351	2.8547
111	0.324	255	255	255	59.29	65.961	1.002	82.672	100	10710	670	752	15.255	0.527	1.90133
114	0.216	255	255	255	76.261	67.604	1.002	55.115	100	7140	866	764	105.255	0.351	2.8547
115	0.309	255	255	255	42.855	67.803	1.002	78.736	100	10200	483	775	37.875	0.492	2.03659
62	0.378	255	255	255	28.847	41.732	1.028	96.451	100	12495	323	473	160.017	0.556	1.84892
113	0.54	255	255	255	65.471	67.216	1.028	137.787	100	17850	740	767	19.983	0.791	1.29962
1	0.61	255	255	255	15.576	12.193	1.058	155.503	100	20145	173	143	41.634	0.87	1.21609
77	0.262	255	255	255	2.45	47.268	1.062	66.925	100	8670	23	540	24.444	0.462	2.2987
83	0.525	255	255	255	76.546	48.635	1.062	133.85	100	17340	870	559	65.556	0.791	1.3426
132	0.417	255	255	255	54.965	75.672	1.062	106.293	100	13770	620	864	24.444	0.615	1.72683
37	0.494	255	255	255	34.494	30.635	1.101	125.977	100	16320	387	352	28.61	0.615	1.79024
110	0.486	255	255	255	78.315	64.97	1.101	124.008	100	16065	886	743	28.61	0.621	1.77295
54	0.479	255	255	255	9.785	38.794	1.111	122.04	100	15810	110	436	108.435	0.615	1.8065
151	0.479	250.887	0	255	65.225	86.1	1.111	120.072	98.387	15555	740	974	108.435	0.703	1.58037
93	0.54	255	255	255	77.259	53.623	1.118	137.787	100	17850	874	614	45	0.825	1.35515
42	0.27	255	255	255	63.942	32.672	1.142	68.894	100	8925	722	374	22.62	0.432	2.64352
48	0.378	255	255	255	21.874	35.098	1.142	96.451	100	12495	246	394	112.62	0.599	1.90651
30	0.224	255	255	255	21.597	27.662	1.156	57.083	100	7395	245	321	81.254	0.351	3.29345
98	0.448	255	255	255	69.152	57.855	1.156	114.167	100	14790	786	652	98.746	0.615	1.87967
34	0.525	255	255	255	52.153	27.987	1.172	133.85	100	17340	591	324	77.005	0.926	1.26566
135	0.811	255	255	255	59.97	77.547	1.172	206.681	100	26775	676	881	167.005	0.953	1.2298
152	0.301	255	255	255	67.202	86.637	1.172	76.767	100	9945	762	992	77.005	0.476	2.46218
59	0.34	249.205	0	255	27.402	41.182	1.179	84.641	97.727	10965	305	465	153.435	0.517	2.28046
96	0.394	255	255	255	64.034	55.6	1.221	100.388	100	13005	725	626	120.256	0.559	2.18426
129	0.664	255	255	255	28.911	75.754	1.221	169.281	100	21930	325	856	120.256	0.808	1.51114
150	0.278	255	255	255	67.444	85.618	1.221	70.862	100	9180	765	969	120.256	0.497	2.45674
43	0.494	255	255	255	61.794	33.37	1.224	125.977	100	16320	697	382	21.038	0.527	2.32258
60	0.34	255	255	255	3.191	41.625	1.224	86.609	100	11220	32	468	111.038	0.547	2.23766
68	0.394	255	255	255	16.813	44.58	1.224	100.388	100	13005	186	504	158.962	0.703	1.74111
134	0.278	255	255	255	49.953	76.252	1.258	70.862	100	9180	562	866	167.905	0.405	3.10617
120	0.394	255	255	255	41.203	70.555	1.279	100.388	100	13005	461	802	164.055	0.53	2.41321
125	0.641	255	255	255	43.711	73.536	1.279	163.376	100	21165	496	844	74.055	0.791	1.61694
73	0.332	255	255	255	72.783	45.62	1.297	84.641	100	10965	821	523	28.301	0.463	2.8013
102	0.602	255	255	255	48.982	61.578	1.306	153.534	100	19890	550	699	160.346	0.615	2.12358
6	0.687	255	255	255	69.205	18.808	1.318	175.187	100	22695	781	208	126.87	1.096	1.20255
95	0.633	255	255	255	72.127	55.363	1.341	161.408	100	20910	814	627	148.392	0.804	1.66791
12	0.71	255	255	255	23.502	19.709	1.344	181.092	100	23460	266	232	78.69	0.791	1.69912
14	0.648	255	255	255	63.78	19.915	1.389	165.345	100	21420	720	232	34.695	0.707	1.96464
107	0.432	255	255	255	50.401	63.334	1.43	110.23	100	14280	565	722	10.62	0.527	2.71347
65	0.718	255	255	255	73.815	43.523	1.449	183.06	100	23715	834	492	165.964	1.078	1.34416
10	0.888	255	255	255	66.099	18.951	1.454	226.365	100	29325	744	219	25.017	0.879	1.65415
21	0.834	255	255	255	50.022	21.467	1.462	212.586	100	27540	563	248	32.735	1.1	1.32909
127	0.401	255	255	255	39.878	74.714	1.504	102.356	100	13260	445	852	6.71	0.439	3.42597
142	0.934	255	255	255	33.316	81.866	1.512	238.175	100	30855	374	939	54.462	0.982	1.53971
4	0.571	255	255	255	16.158	16.696	1.534	145.661	100	18870	182	181	103.241	0.6	2.55667
118	1.003	255	255	255	64.476	70.48	1.572	255.891	100	33150	730	793	116.565	0.966	1.62733
33	0.432	255	255	255	19.266	28.16	1.591	110.23	100	14280	217	311	96.34	0.439	3.62415
105	0.857	255	255	255	46.076	63.065	1.651	218.491	100	28305	515	721	25.201	0.786	2.10051
147	0.926	255	255	255	64.215	83.811	1.667	236.207	100	30600	725	964	71.565	1.04	1.60288
38	0.455	255	255	255	1.205	30.984	1.69	116.135	100	15045	5	356	27.897	0.451	3.74723
8	0.903	255	255	255	62.728	19.107	1.757	230.301	100	29835	705	221	36.87	0.932	1.88519
70	0.417	255	255	255	28.683	44.948	1.886	106.293	100	13770	317	507	152.241	0.45	4.19111
24	1.142	255	255	255	63.374	22.7	1.901	291.322	100	37740	714	249	123.69	0.932	2.0397
20	0.455	255	255	255	11.775	21.51	2.023	116.135	100	15045	128	236	124.38	0.449	4.50557
47	0.44	255	255	255	12.662	34.876	2.028	112.198	100	14535	136	401	17.65	0.613	3.30832
136	0.957	255	255	255	63.104	79.015	2.028	244.08	100	31620	715	910	72.35	0.896	2.26339
40	0.756	255	255	255	18.808	32.519	2.088	192.902	100	24990	203	364	157.751	0.679	3.07511
101	0.741	255	255	255	73.79	61.182	2.17	188.965	100	24480	828	701	21.371	0.528	4.10985
46	0.942	255	255	255	54.884	34.105	2.364	240.143	100	31110	615	379	138.013	0.762	3.10236
39	0.857	255	255	255	20.468	31.299	2.374	218.491	100	28305	222	366	38.991	0.683	3.47584
27	0.888	255	255	255	32.126	26.075	2.398	226.365	100	29325	353	293	151.557	1.28	1.87344
2	0.988	255	255	255	19.301	14.335	2.554	251.954	100	32640	207	158	153.435	0.629	4.06041
23	0.965	255	255	255	29.078	22.408	2.585	246.049	100	31875	331	242	99.782	0.956	2.70397
66	1.251	255	255	255	23.163	44.91	2.757	318.879	100	41310	260	497	112.479	0.893	3.08735
85	1.142	255	255	255	75.622	50.291	2.89	291.322	100	37740	844	569	160.463	0.897	3.22185
36	1.467	252.316	0	255	9.259	31.213	3.307	370.057	98.947	47940	88	364	16.991	1.418	2.33216
19	2.022	255	255	255	25.431	21.737	3.508	515.718	100	66810	275	238	157.932	2.032	1.72638
67	2.663	254.261	0	255	75.695	45.723	3.819	677.126	99.71	87720	850	541	66.975	2.799	1.36442

## Sheet: Size
Range	Frequency
0.5–1	518
1–1.5	364
1.5–2	120
2–2.5	53
2.5–3	28
2.5–3.5	12
3.5–4	10
4–4.5	8
4.5–5	3
5–5.5	2
>5.5	0
Total WPBs	1118

## Sheet: Aspect
Ratio	Frequency
1–1.5	460
1.5–2	322
2–2.5	157
2.5–3	80
3–3.5	43
3.5–4	25
4–4.5	15
4.5–5	8
5–5.5	4
5.5–6	1
>6	3
