# Supplementary material for: V-ATPase V0a1 promotes Weibel–Palade body biogenesis through the regulation of membrane fission
Source: eLife journal article supplement (doi:10.7554/elife.71526), 2021-12-14
Supplement: fig3-figsupp3-data1 [file Fig3-figure supplement 3_Feret_shV0a2.xlsx]

## Sheet: shV0a2
	Area	Mean	Min	Max	X	Y	Feret	IntDen	%Area	RawIntDen	FeretX	FeretY	FeretAngle	MinFeret	Max/Min		Range
143	0.208	255	255	255	46.573	56.96	0.589	53.146	100	6885	529	645	116.565	0.527	1.11765		0
42	0.232	255	255	255	13.428	12.915	0.634	59.052	100	7650	151	144	123.69	0.527	1.20304		0.5
86	0.208	255	255	255	38.529	38.363	0.64	53.146	100	6885	435	438	15.945	0.439	1.45786		1
25	0.232	255	255	255	14.277	6.39	0.669	59.052	100	7650	159	71	156.801	0.527	1.26945		1.5
69	0.255	255	255	255	35.581	32.693	0.669	64.957	100	8415	404	376	66.801	0.527	1.26945		2
75	0.262	255	255	255	31.826	35.89	0.669	66.925	100	8670	361	405	113.199	0.527	1.26945		2.5
151	0.224	255	255	255	76.82	58.646	0.669	57.083	100	7395	873	664	113.199	0.439	1.52392		3
28	0.208	255	255	255	25.1	6.617	0.686	53.146	100	6885	282	73	140.194	0.439	1.56264		3.5
176	0.247	255	255	255	82.137	65.117	0.686	62.988	100	8160	932	744	39.806	0.527	1.30171		4
66	0.27	255	255	255	31.809	31.929	0.708	68.894	100	8925	360	360	119.745	0.527	1.34345		4.5
98	0.278	255	255	255	18.243	40.317	0.708	70.862	100	9180	204	457	150.255	0.527	1.34345		5
160	0.232	255	255	255	79.963	61.378	0.708	59.052	100	7650	908	695	119.745	0.527	1.34345		5.5
79	0.216	255	255	255	67.686	36.342	0.725	55.115	100	7140	766	413	165.964	0.439	1.65148
124	0.286	255	255	255	41.487	46.298	0.751	72.83	100	9435	468	528	20.556	0.527	1.42505
194	0.216	255	255	255	29.091	68.197	0.751	55.115	100	7140	330	772	110.556	0.351	2.1396
78	0.309	255	255	255	38.421	36.288	0.756	78.736	100	10200	435	409	125.538	0.615	1.22927
94	0.355	255	255	255	14.884	39.58	0.756	90.546	100	11730	167	447	125.538	0.615	1.22927
103	0.224	255	255	255	24.278	40.865	0.756	57.083	100	7395	272	463	144.462	0.545	1.38716
109	0.347	255	255	255	18.709	41.683	0.756	88.577	100	11475	210	471	125.538	0.615	1.22927
144	0.224	255	255	255	20.367	57.104	0.756	57.083	100	7395	230	646	125.538	0.487	1.55236
181	0.262	255	255	255	29.611	66.625	0.756	66.925	100	8670	334	755	144.462	0.615	1.22927
224	0.301	255	255	255	29.749	73.447	0.756	76.767	100	9945	335	838	35.538	0.604	1.25166
32	0.316	255	255	255	56.046	7.87	0.786	80.704	100	10455	637	85	116.565	0.615	1.27805
96	0.371	255	255	255	48.081	39.86	0.786	94.483	100	12240	543	452	153.435	0.703	1.11807
136	0.201	255	255	255	39.472	54.706	0.786	51.178	100	6630	447	627	63.435	0.439	1.79043
166	0.27	255	255	255	58.41	63.071	0.786	68.894	100	8925	661	720	26.565	0.511	1.53816
198	0.224	255	255	255	79.074	68.234	0.786	57.083	100	7395	896	775	153.435	0.439	1.79043
90	0.363	255	255	255	69.716	39.027	0.796	92.514	100	11985	789	444	173.66	0.703	1.13229
1	0.301	255	255	255	21.409	0.294	0.81	76.767	100	9945	240	6	40.601	0.615	1.31707
93	0.378	255	255	255	60.769	39.209	0.81	96.451	100	12495	688	449	40.601	0.703	1.1522
237	0.239	255	255	255	25.753	76.49	0.829	61.02	100	7905	289	868	147.995	0.431	1.92343
59	0.401	255	255	255	44.076	27.101	0.834	102.356	100	13260	500	304	108.435	0.615	1.3561
243	0.239	255	255	255	44.928	82.2	0.834	61.02	100	7905	507	934	161.565	0.439	1.89977
76	0.216	255	255	255	62.141	35.79	0.896	55.115	100	7140	703	406	168.69	0.351	2.55271
23	0.247	255	255	255	66.764	5.947	0.905	62.988	100	8160	755	70	29.055	0.439	2.0615
99	0.509	255	255	255	25.733	40.6	0.905	129.914	100	16830	290	458	119.055	0.791	1.14412
111	0.44	255	255	255	45.328	41.996	0.905	112.198	100	14535	512	474	119.055	0.703	1.28734
241	0.394	255	255	255	88.375	81.809	0.905	100.388	100	13005	1004	936	60.945	0.636	1.42296
44	0.224	255	255	255	27.135	13.28	0.917	57.083	100	7395	304	149	163.301	0.348	2.63506
74	0.471	255	255	255	32.896	35.892	0.917	120.072	100	15555	372	404	106.699	0.703	1.30441
89	0.455	255	255	255	49.273	39.044	0.917	116.135	100	15045	556	447	16.699	0.703	1.30441
196	0.27	255	255	255	38.514	68.283	0.917	68.894	100	8925	437	772	106.699	0.439	2.08884
106	0.525	255	255	255	67.474	41.316	0.946	133.85	100	17340	763	468	158.199	0.791	1.19595
112	0.363	255	255	255	22.255	42.039	0.946	92.514	100	11985	247	478	158.199	0.615	1.53821
200	0.247	255	255	255	19.606	68.689	0.946	62.988	100	8160	218	783	21.801	0.485	1.95052
24	0.594	255	255	255	30.579	6.434	0.982	151.566	100	19635	345	78	63.435	0.879	1.11718
33	0.563	255	255	255	12.351	8.449	0.982	143.692	100	18615	138	101	63.435	0.791	1.24147
37	0.355	249.457	0	255	12.875	10.027	0.982	88.577	97.826	11475	142	117	26.565	0.527	1.86338
135	0.201	255	255	255	71.409	54.621	0.982	51.178	100	6630	812	616	100.305	0.351	2.79772
188	0.309	255	255	255	12.089	67.588	0.982	78.736	100	10200	136	764	100.305	0.439	2.2369
115	0.247	255	255	255	46.837	42.864	1.002	62.988	100	8160	528	491	37.875	0.432	2.31944
121	0.216	255	255	255	31.35	44.529	1.002	55.115	100	7140	352	509	15.255	0.351	2.8547
133	0.239	255	255	255	38.784	54.366	1.025	61.02	100	7905	438	613	120.964	0.432	2.37269
134	0.401	255	255	255	40.805	54.275	1.025	102.356	100	13260	460	614	120.964	0.788	1.30076
230	0.309	255	255	255	67.59	74.825	1.025	78.736	100	10200	764	848	149.036	0.497	2.06237
43	0.502	255	255	255	24.102	13.152	1.028	127.945	100	16575	272	145	109.983	0.786	1.30789
193	0.448	255	255	255	28.171	68.241	1.028	114.167	100	14790	318	771	109.983	0.615	1.67154
22	0.401	255	255	255	22.289	5.91	1.058	102.356	100	13260	249	71	41.634	0.59	1.79322
48	0.479	255	255	255	24.289	14.923	1.058	122.04	100	15810	272	174	41.634	0.703	1.50498
164	0.224	255	255	255	48.327	62.802	1.058	57.083	100	7395	546	710	131.634	0.373	2.83646
189	0.201	255	255	255	16.048	67.54	1.058	51.178	100	6630	178	773	41.634	0.311	3.40193
132	0.255	255	255	255	39.847	53.603	1.072	64.957	100	8415	449	607	145.008	0.435	2.46437
242	0.316	255	255	255	49.886	81.973	1.072	80.704	100	10455	564	938	55.008	0.487	2.20123
30	0.232	255	255	255	31.152	7.439	1.087	59.052	100	7650	348	83	165.964	0.351	3.09687
41	0.548	255	255	255	15.573	11.871	1.087	139.756	100	18105	171	135	165.964	0.703	1.54623
174	0.479	255	255	255	30.933	65.061	1.087	122.04	100	15810	346	742	14.036	0.791	1.37421
141	0.34	255	255	255	66.471	56.489	1.101	86.609	100	11220	755	650	61.39	0.682	1.61437
153	0.386	255	255	255	42.408	59.09	1.101	98.419	100	12750	478	669	151.39	0.527	2.08918
50	0.648	255	255	255	10.085	16.034	1.111	165.345	100	21420	109	180	161.565	0.791	1.40455
182	0.255	255	255	255	27.065	66.646	1.111	64.957	100	8415	302	760	18.435	0.361	3.07756
102	0.201	255	255	255	52.357	40.794	1.125	51.178	100	6630	591	460	141.34	0.343	3.27988
108	0.556	255	255	255	62.616	41.568	1.125	141.724	100	18360	709	469	128.66	0.791	1.42225
6	0.656	255	255	255	19.299	0.939	1.142	167.313	100	21675	217	17	67.38	0.861	1.32636
117	0.479	255	255	255	37.667	43.904	1.142	122.04	100	15810	426	494	112.62	0.611	1.86907
126	0.247	255	255	255	31.569	51.093	1.142	62.988	100	8160	353	579	157.38	0.361	3.16343
38	0.316	255	255	255	23.468	10.54	1.146	80.704	100	10455	262	124	32.471	0.511	2.24266
154	0.448	255	255	255	59.879	59.28	1.172	114.167	100	14790	676	677	12.995	0.703	1.66714
185	0.355	255	255	255	19.516	67.128	1.172	90.546	100	11730	216	764	12.995	0.573	2.04538
63	0.872	255	255	255	46.103	30.719	1.179	222.428	100	28815	519	346	153.435	1.054	1.1186
53	0.409	255	255	255	18.367	16.651	1.182	104.325	100	13515	204	194	41.987	0.521	2.26871
18	0.293	255	255	255	56.787	4.492	1.195	74.799	100	9690	640	53	17.103	0.389	3.07198
77	0.262	255	255	255	8.869	36.038	1.195	66.925	100	8670	95	408	162.897	0.361	3.31025
162	0.355	255	255	255	40.47	62.481	1.195	90.546	100	11730	459	718	72.897	0.567	2.10758
47	0.486	255	255	255	27.669	14.391	1.221	124.008	100	16065	310	168	30.256	0.658	1.85562
140	0.448	255	255	255	64.264	56.62	1.221	114.167	100	14790	728	638	120.256	0.583	2.09434
105	0.98	255	255	255	44.373	41.348	1.224	249.985	100	32385	503	464	111.038	1.054	1.16129
171	0.347	255	255	255	35.09	64.521	1.224	88.577	100	11475	398	741	68.962	0.469	2.60981
31	0.378	255	255	255	32.437	7.524	1.243	96.451	100	12495	366	93	45	0.855	1.4538
123	0.232	255	255	255	43.982	44.717	1.243	59.052	100	7650	494	510	8.13	0.297	4.18519
152	0.448	255	255	255	40.927	59.177	1.243	114.167	100	14790	463	668	135	0.879	1.41411
101	0.872	255	255	255	61.386	40.842	1.258	222.428	100	28815	695	459	114.775	1.1	1.14364
201	0.355	255	255	255	29.202	68.988	1.258	90.546	100	11730	331	792	65.225	0.861	1.46109
211	0.355	255	255	255	76.111	70.978	1.258	90.546	100	11730	860	805	155.225	0.471	2.67091
52	0.316	255	255	255	12.37	16.476	1.267	80.704	100	10455	136	193	56.31	0.404	3.13614
199	0.594	255	255	255	18.103	68.519	1.279	151.566	100	19635	199	781	15.945	0.791	1.61694
88	0.633	255	255	255	37.32	39.063	1.297	161.408	100	20910	419	448	28.301	0.828	1.56643
12	0.247	255	255	255	22.003	3.937	1.306	62.988	100	8160	245	39	132.274	0.372	3.51075
16	0.378	255	255	255	63.365	4.423	1.306	96.451	100	12495	714	54	19.654	0.582	2.24399
120	0.679	255	255	255	42.341	44.565	1.306	173.218	100	22440	479	514	70.346	0.703	1.85775
130	0.316	255	255	255	47.933	53.539	1.306	80.704	100	10455	543	602	109.654	0.393	3.32316
225	0.533	255	255	255	53.877	74.215	1.318	135.819	100	17595	609	839	126.87	0.621	2.12238
20	0.309	255	255	255	24.609	4.993	1.321	78.736	100	10200	272	56	176.186	0.351	3.76353
180	0.262	255	255	255	25.489	66.351	1.321	66.925	100	8670	282	754	176.186	0.35	3.77429
222	0.316	255	255	255	73.13	73.067	1.338	80.704	100	10455	826	835	23.199	0.386	3.46632
231	0.494	255	255	255	23.538	75.053	1.341	125.977	100	16320	261	858	31.608	0.645	2.07907
149	0.293	255	255	255	63.859	58.382	1.344	74.799	100	9690	719	666	11.31	0.351	3.82906
216	0.347	255	255	255	23.576	72.205	1.344	88.577	100	11475	267	814	101.31	0.351	3.82906
125	0.301	255	255	255	67.873	49.993	1.367	76.767	100	9945	767	564	135	0.398	3.43467
202	0.602	255	255	255	27.498	69.027	1.367	153.534	100	19890	307	781	135	0.746	1.83244
208	0.201	255	255	255	61.903	70.791	1.375	51.178	100	6630	701	813	63.435	0.294	4.67687
2	0.293	255	255	255	77.177	0.194	1.389	74.799	100	9690	870	0	161.565	0.398	3.48995
46	0.494	255	255	255	20.596	14.425	1.389	125.977	100	16320	227	169	34.695	0.879	1.5802
82	0.355	255	255	255	63.277	37.485	1.389	90.546	100	11730	715	423	145.305	0.604	2.29967
116	0.232	255	255	255	67.238	43.191	1.389	59.052	100	7650	758	494	18.435	0.305	4.5541
139	0.417	255	255	255	44.408	56.03	1.389	106.293	100	13770	503	630	108.435	0.431	3.22274
168	0.587	255	255	255	82.395	63.781	1.389	149.598	100	19380	931	730	34.695	0.796	1.74497
187	0.247	255	255	255	80.693	67.517	1.419	62.988	100	8160	914	777	68.199	0.465	3.05161
107	0.811	255	255	255	32.933	41.507	1.43	206.681	100	26775	367	470	169.38	0.791	1.80784
184	0.316	255	255	255	17.811	66.941	1.43	80.704	100	10455	194	762	169.38	0.499	2.86573
220	0.247	255	255	255	57.007	73.368	1.43	62.988	100	8160	646	827	100.62	0.36	3.97222
163	0.409	255	255	255	46.041	62.336	1.449	104.325	100	13515	516	709	165.964	0.584	2.48116
19	0.587	255	255	255	69.331	4.865	1.454	149.598	100	19380	782	49	115.017	1.028	1.4144
39	0.648	255	255	255	14.13	11.003	1.473	165.345	100	21420	153	123	162.646	0.609	2.41872
209	0.44	255	255	255	40.228	70.755	1.473	112.198	100	14535	450	807	17.354	0.479	3.07516
178	0.633	255	255	255	23.554	66.287	1.496	161.408	100	20910	262	749	139.764	0.705	2.12199
218	0.656	255	255	255	68.515	72.695	1.496	167.313	100	21675	774	834	49.764	0.825	1.81333
240	0.656	255	255	255	63.815	80.085	1.501	167.313	100	21675	723	919	69.444	0.667	2.25037
172	0.409	255	255	255	40.169	64.935	1.534	104.325	100	13515	455	749	66.371	0.632	2.42722
4	0.463	255	255	255	8.601	0.739	1.537	118.103	100	15300	90	13	30.964	0.471	3.26327
205	0.471	255	255	255	72.15	70.427	1.537	120.072	100	15555	815	796	149.036	0.651	2.36098
55	0.849	255	255	255	13.27	19.405	1.564	216.523	100	28050	146	228	51.843	0.773	2.02329
57	0.664	255	255	255	24.423	23.251	1.584	169.281	100	21930	269	262	160.56	0.689	2.29898
87	0.865	255	255	255	43.633	38.955	1.584	220.46	100	28560	488	440	160.56	0.879	1.80205
137	0.494	255	255	255	76.314	55.046	1.584	125.977	100	16320	865	634	56.31	0.703	2.2532
49	0.656	255	255	255	2.324	15.294	1.603	167.313	100	21675	19	172	170.538	0.615	2.6065
228	0.262	255	255	255	21.823	74.298	1.615	66.925	100	8670	240	850	22.38	0.402	4.01741
167	0.44	255	255	255	79.052	63.769	1.634	112.198	100	14535	892	731	36.254	0.494	3.30769
232	0.772	255	255	255	21.574	75.594	1.634	196.839	100	25500	240	868	53.746	0.738	2.21409
97	1.058	255	255	255	41.533	40.646	1.651	269.669	100	34935	465	469	25.201	1.133	1.45719
21	0.316	255	255	255	51.771	5.515	1.679	80.704	100	10455	583	70	47.121	0.336	4.99702
54	0.834	255	255	255	16.456	16.835	1.688	212.586	100	27540	180	199	38.66	0.829	2.03619
183	0.803	255	255	255	31.477	67.118	1.69	204.712	100	26520	347	765	8.973	0.84	2.0119
92	0.872	255	255	255	58.556	39.084	1.697	222.428	100	28815	659	448	21.251	0.879	1.9306
118	1.251	255	255	255	48.03	44.378	1.706	318.879	100	41310	538	510	11.889	1.43	1.19301
223	0.695	255	255	255	35.725	73.326	1.706	177.155	100	22950	397	830	145.491	0.743	2.2961
215	0.741	255	255	255	51.674	71.828	1.726	188.965	100	24480	578	820	14.744	0.864	1.99769
221	0.618	255	255	255	21.158	73.11	1.726	157.471	100	20400	233	829	165.256	0.763	2.26212
17	0.811	255	255	255	66.404	4.791	1.731	206.681	100	26775	753	65	66.038	0.861	2.01045
51	0.726	255	255	255	15.417	16.494	1.744	185.029	100	23970	168	194	40.914	0.609	2.86371
70	0.756	255	255	255	59.628	33.838	1.744	192.902	100	24990	671	391	40.914	0.661	2.63843
159	0.587	255	255	255	18.758	61.443	1.744	149.598	100	19380	204	703	40.914	1.073	1.62535
207	0.44	255	255	255	52.471	70.591	1.744	112.198	100	14535	591	811	49.086	0.435	4.0092
13	1.027	255	255	255	64.76	3.984	1.779	261.796	100	33915	729	48	20.225	1.142	1.55779
110	1.498	255	255	255	34.769	42.176	1.779	381.867	100	49470	387	486	32.905	1.177	1.51147
127	0.795	255	255	255	34.926	52.256	1.779	202.744	100	26265	395	584	110.225	0.93	1.9129
148	0.448	255	255	255	17.644	58.303	1.779	114.167	100	14790	191	667	20.225	0.417	4.26619
239	0.88	255	255	255	60.385	77.658	1.779	224.396	100	29070	680	892	57.095	0.91	1.95495
131	0.849	255	255	255	36.585	53.312	1.811	216.523	100	28050	407	603	165.964	0.788	2.29822
186	0.517	255	255	255	76.543	67.32	1.864	131.882	100	17085	860	766	171.87	0.663	2.81146
210	0.849	255	255	255	69.963	71.319	1.864	216.523	100	28050	784	815	8.13	1.318	1.41426
146	0.602	255	255	255	71.381	57.563	1.897	153.534	100	19890	803	653	166.608	0.648	2.92747
165	0.988	255	255	255	56.961	63.256	1.901	251.954	100	32640	643	729	56.31	0.714	2.66246
119	0.394	255	255	255	52.349	44.225	1.935	100.388	100	13005	587	496	140.528	0.359	5.38997
234	0.633	255	255	255	67.525	75.535	1.941	161.408	100	20910	758	858	174.806	0.542	3.58118
67	0.988	255	255	255	27.538	32.062	1.951	251.954	100	32640	302	366	7.765	0.703	2.77525
190	0.957	255	255	255	55.584	67.981	1.992	244.08	100	31620	623	783	41.424	1.367	1.45721
7	0.895	255	255	255	10.857	1.407	2.003	228.333	100	29580	111	18	15.255	1.011	1.98121
128	1.073	255	255	255	24.404	52.977	2.003	273.606	100	35445	269	613	37.875	1.085	1.84608
244	0.579	255	255	255	76.22	87.092	2.003	147.629	100	19125	862	1001	52.125	0.6	3.33833
214	0.895	255	255	255	33.221	71.952	2.028	228.333	100	29580	369	812	162.35	1.053	1.92593
233	0.957	250.887	0	255	26.689	75.789	2.028	240.143	98.387	31110	301	852	107.65	0.879	2.30717
206	0.394	255	255	255	25.473	70.433	2.049	100.388	100	13005	277	808	30.964	0.662	3.09517
155	1.15	255	255	255	42.45	60.819	2.057	293.29	100	37995	482	704	70.017	1.69	1.21716
204	0.618	255	255	255	69.027	69.893	2.125	157.471	100	20400	775	799	29.745	0.747	2.84471
169	1.027	255	255	255	58.028	64.394	2.17	261.796	100	33915	651	724	121.759	1.243	1.74578
71	1.49	255	255	255	35.935	35.036	2.174	379.899	100	49215	396	397	165.964	1.553	1.39987
83	0.548	255	255	255	62.493	38.293	2.182	139.756	100	18105	703	425	139.899	0.747	2.92102
113	1.166	255	255	255	40.8	43.131	2.245	297.227	100	38505	454	481	120.579	1.421	1.57987
114	0.98	255	255	255	52.633	42.943	2.279	249.985	100	32385	590	494	27.553	0.886	2.57223
142	0.78	255	255	255	76.785	57.137	2.291	198.807	100	25755	861	649	175.601	0.86	2.66395
212	0.618	255	255	255	74.601	71.314	2.291	157.471	100	20400	835	810	175.601	0.432	5.30324
158	1.289	255	255	255	38.11	61.195	2.306	328.721	100	42585	428	707	49.635	1.163	1.9828
104	0.973	255	255	255	38.179	41.236	2.334	248.017	100	32130	422	465	160.201	0.914	2.55361
235	0.571	255	255	255	62.481	76.658	2.339	145.661	100	18870	704	883	55.713	0.439	5.32802
175	0.502	255	255	255	42.783	65.973	2.344	127.945	100	16575	485	763	77.005	0.526	4.45627
245	0.733	255	255	255	2.889	88.874	2.366	186.997	100	24225	25	1001	121.329	0.651	3.63441
80	1.459	255	255	255	24.959	37.22	2.39	372.025	100	48195	273	414	143.973	1.188	2.01178
145	0.826	255	255	255	67.787	57.561	2.39	210.618	100	27285	759	659	17.103	0.906	2.63797
150	0.78	255	255	255	47.039	58.781	2.4	198.807	100	25755	522	663	156.251	0.873	2.74914
40	0.533	255	255	255	28.58	11.677	2.462	135.819	100	17595	315	140	34.824	0.533	4.61914
95	1.575	255	255	255	46.28	40.269	2.513	401.551	100	52020	517	450	143.531	1.173	2.14237
81	1.088	255	255	255	33.309	38.301	2.516	277.543	100	35955	375	421	102.095	0.966	2.60455
29	1.459	255	255	255	27.077	7.664	2.562	372.025	100	48195	295	93	5.906	1.179	2.17303
156	0.872	255	255	255	49.89	60.933	2.621	222.428	100	28815	556	705	50.44	0.815	3.21595
91	1.853	255	255	255	55.016	40.016	2.649	472.413	100	61200	625	441	95.711	1.142	2.31961
58	1.575	255	255	255	20.373	26.434	2.672	401.551	100	52020	218	313	46.332	1.586	1.68474
122	0.803	255	255	255	74.364	44.852	2.728	204.712	100	26520	829	506	165.069	0.551	4.951
157	0.934	255	255	255	60.031	61.605	2.736	238.175	100	30855	681	685	95.528	0.527	5.19165
195	1.166	255	255	255	35.997	69.377	2.757	297.227	100	38505	399	801	67.521	1.718	1.60477
236	1.158	255	255	255	69.681	76.539	2.817	295.258	100	38250	779	869	176.424	1.318	2.13733
68	1.698	252.682	0	255	1.753	33.035	2.833	429.109	99.091	55590	6	389	29.745	1.57	1.80446
226	1.212	255	255	255	60.334	74.68	2.851	309.037	100	40035	675	839	123.69	1.414	2.01627
65	1.119	255	255	255	61.501	31.705	2.946	285.416	100	36975	687	368	17.354	1.195	2.46527
203	1.474	255	255	255	17.623	69.843	2.947	375.962	100	48705	184	793	169.695	1.211	2.43353
85	1.806	255	255	255	36.027	38.977	2.953	460.603	100	59670	401	460	59.621	1.322	2.23374
35	1.204	255	255	255	29.677	9.448	2.964	307.069	100	39780	321	104	168.024	0.615	4.81951
138	2.725	255	255	255	21.363	56.293	2.964	694.841	100	90015	225	642	11.976	2.247	1.31909
219	1.783	251.688	0	255	25.481	73.849	2.987	448.793	98.701	58140	283	822	118.072	1.137	2.62709
61	0.942	255	255	255	3.128	30.443	3.008	240.143	100	31110	19	347	6.71	0.49	6.13878
11	1.359	255	255	255	27.703	4.612	3.24	346.436	100	44880	306	37	139.399	2.429	1.33388
26	0.88	255	255	255	54.738	6.424	3.27	224.396	100	29070	603	74	6.17	0.532	6.14662
238	1.436	255	255	255	63.584	78.132	3.293	366.12	100	47430	710	901	46.081	1.788	1.84172
10	2.092	255	255	255	68.736	3.008	3.417	533.433	100	69105	763	39	17.969	1.236	2.76456
9	0.996	255	255	255	50.192	2.625	3.437	253.922	100	32895	561	47	57.529	0.668	5.14521
100	3.867	252.964	0	255	28.912	41.657	3.444	978.289	99.202	126735	310	463	142.253	2.757	1.24918
3	3.18	253.143	0	255	53.381	2.037	3.498	805.071	99.272	104295	584	30	11.592	2.649	1.3205
173	2.046	255	255	255	79.434	66.065	3.532	521.623	100	67575	882	749	174.289	1.922	1.83767
36	2.625	240.75	0	255	25.623	10.589	3.542	631.853	94.412	81855	274	116	156.615	2.101	1.68586
197	4.346	255	255	255	22.868	69.38	3.602	1108.2	100	143565	241	795	12.68	2.884	1.24896
60	1.544	255	255	255	22.067	27.651	3.641	393.678	100	51000	233	318	8.326	0.745	4.88725
179	2.91	255	255	255	21.442	67.208	3.662	742.083	100	96135	240	789	59.744	2.109	1.73637
213	2.046	255	255	255	77.805	72.56	3.779	521.623	100	67575	866	836	35.538	1.195	3.16234
84	3.211	255	255	255	57.436	39.811	3.815	818.85	100	106080	649	429	104.676	2.234	1.7077
64	1.683	255	255	255	58.923	31.146	3.918	429.109	100	55590	650	363	19.654	1.391	2.81668
227	2.223	240.833	0	255	63.739	74.959	3.978	535.402	94.444	69360	705	840	149.47	1.554	2.55985
192	2.671	255	255	255	71.431	68.767	4.057	681.063	100	88230	789	775	162.35	2.186	1.8559
14	4.879	246.93	0	255	18.64	5.332	4.175	1204.65	96.835	156060	188	62	8.471	2.522	1.65543
129	0.949	255	255	255	24.699	54.055	4.294	242.112	100	31365	257	625	30.763	0.92	4.66739
72	2.972	255	255	255	61.563	35.733	4.341	757.83	100	98175	685	424	35.942	2.144	2.02472
27	1.706	255	255	255	60.766	7.238	4.401	435.014	100	56355	668	95	26.053	1.152	3.82031
217	3.435	255	255	255	32.016	73.096	4.445	875.933	100	113475	342	845	18.435	2.299	1.93345
161	3.173	255	255	255	42.796	63.178	4.489	809.008	100	104805	468	700	139.764	1.869	2.40182
45	2.1	253.125	0	255	17.349	14.388	4.576	531.465	99.265	68850	173	164	176.698	0.879	5.20592
5	6.283	197.359	0	255	15.401	2.219	4.67	1240.09	77.396	160650	159	40	41.186	3.089	1.51182
15	3.528	253.326	0	255	59.541	5.039	4.842	893.649	99.344	115770	655	56	11.514	2.223	2.17814
177	2.532	254.223	0	255	59.206	67.393	5.204	643.663	99.695	83385	665	799	68.199	1.708	3.04684
170	3.18	255	255	255	37.366	65.967	5.395	810.976	100	105060	416	779	59.676	2.121	2.54361
62	4.323	242.705	0	255	5.967	31.319	5.468	1049.15	95.179	135915	43	371	23.682	1.838	2.97497
93	0.232	255	255	255	6.417	22.416	0.634	59.052	100	7650	71	252	123.69	0.527	1.20304
112	0.239	255	255	255	76.722	37.679	0.64	61.02	100	7905	870	427	164.055	0.527	1.21442
200	0.216	255	255	255	23.697	64.934	0.64	55.115	100	7140	266	739	164.055	0.511	1.25245
203	0.208	255	255	255	48.822	65.583	0.64	53.146	100	6885	552	746	164.055	0.439	1.45786
67	0.255	255	255	255	14.857	17.661	0.669	64.957	100	8415	166	199	156.801	0.527	1.26945
223	0.232	255	255	255	81.84	72.079	0.669	59.052	100	7650	928	819	156.801	0.527	1.26945
48	0.208	255	255	255	55.519	13.402	0.686	53.146	100	6885	629	150	140.194	0.439	1.56264
170	0.232	255	255	255	0.776	58.183	0.708	59.052	100	7650	5	664	29.745	0.55	1.28727
237	0.27	255	255	255	84.614	75.123	0.725	68.894	100	8925	962	851	104.036	0.527	1.37571
244	0.316	255	255	255	44.67	76.513	0.725	80.704	100	10455	507	867	104.036	0.615	1.17886
117	0.286	255	255	255	63.447	39.763	0.751	72.83	100	9435	718	451	159.444	0.583	1.28816
194	0.247	255	255	255	37.211	63.909	0.751	62.988	100	8160	420	726	159.444	0.527	1.42505
212	0.278	255	255	255	46.636	69.23	0.751	70.862	100	9180	529	784	110.556	0.527	1.42505
217	0.27	255	255	255	23.811	70.464	0.751	68.894	100	8925	269	798	110.556	0.527	1.42505
202	0.301	255	255	255	44.658	65.337	0.756	76.767	100	9945	506	740	125.538	0.615	1.22927
40	0.201	255	255	255	43.828	11.807	0.786	51.178	100	6630	495	136	26.565	0.432	1.81944
78	0.27	255	255	255	46.629	18.991	0.786	68.894	100	8925	529	212	116.565	0.527	1.49146
225	0.247	255	255	255	44.407	72.495	0.786	62.988	100	8160	501	823	153.435	0.439	1.79043
228	0.216	255	255	255	75.044	73.13	0.786	55.115	100	7140	850	834	26.565	0.405	1.94074
259	0.262	255	255	255	82.006	80.179	0.786	66.925	100	8670	930	916	26.565	0.597	1.31658
22	0.324	255	255	255	71.64	8.271	0.834	82.672	100	10710	815	99	71.565	0.527	1.58254
29	0.247	255	255	255	88.71	9.535	0.834	62.988	100	8160	1008	104	108.435	0.439	1.89977
234	0.301	255	255	255	81.358	74.891	0.834	76.767	100	9945	924	848	108.435	0.527	1.58254
253	0.378	255	255	255	40.538	78.339	0.865	96.451	100	12495	459	896	66.038	0.615	1.4065
229	0.425	255	255	255	45.047	73.569	0.87	108.261	100	14025	509	834	135	0.703	1.23755
242	0.216	255	255	255	35.893	76.032	0.87	55.115	100	7140	405	869	45	0.373	2.33244
23	0.301	255	255	255	43.739	8.406	0.879	76.767	100	9945	496	101	53.13	0.727	1.20908
69	0.432	255	255	255	46.207	17.809	0.879	110.23	100	14280	523	207	53.13	0.773	1.13713
198	0.463	255	255	255	43.026	64.932	0.896	118.103	100	15300	489	734	101.31	0.788	1.13706
20	0.394	255	255	255	13.436	8.272	0.905	100.388	100	13005	151	99	60.945	0.668	1.35479
37	0.278	255	255	255	50.321	10.98	0.905	70.862	100	9180	570	121	119.055	0.439	2.0615
71	0.309	255	255	255	31.423	18.031	0.905	78.736	100	10200	355	210	60.945	0.559	1.61896
211	0.208	255	255	255	50.69	67.126	0.905	53.146	100	6885	574	768	60.945	0.39	2.32051
216	0.278	255	255	255	47.136	70.138	0.905	70.862	100	9180	532	796	150.945	0.471	1.92144
7	0.224	255	255	255	89.811	2.774	0.917	57.083	100	7395	1021	27	106.699	0.351	2.61254
70	0.494	255	255	255	44.73	18.019	0.917	125.977	100	16320	508	200	106.699	0.791	1.15929
115	0.432	255	255	255	64.143	39.265	0.917	110.23	100	14280	728	442	106.699	0.703	1.30441
152	0.378	255	255	255	47.515	55.112	0.946	96.451	100	12495	536	625	158.199	0.615	1.53821
208	0.27	255	255	255	35.582	66.312	0.946	68.894	100	8925	403	750	111.801	0.439	2.1549
131	0.255	255	255	255	6.013	45.334	0.95	64.957	100	8415	65	520	56.31	0.432	2.19907
155	0.324	255	255	255	21.007	55.828	0.95	82.672	100	10710	234	632	146.31	0.615	1.54472
245	0.371	255	255	255	87.01	76.796	0.95	94.483	100	12240	987	879	56.31	0.78	1.21795
80	0.255	255	255	255	38.494	18.902	0.97	64.957	100	8415	433	214	174.806	0.439	2.20957
109	0.232	255	255	255	67.604	35.691	0.982	59.052	100	7650	769	400	100.305	0.439	2.2369
240	0.239	255	255	255	40.448	75.574	0.982	61.02	100	7905	459	866	79.695	0.422	2.32701
77	0.309	255	255	255	44.52	18.874	1.002	78.736	100	10200	503	211	142.125	0.527	1.90133
163	0.533	255	255	255	44.497	57.156	1.002	135.819	100	17595	504	645	127.875	0.791	1.26675
257	0.332	255	255	255	36.054	79.536	1.002	84.641	100	10965	404	906	15.255	0.55	1.82182
250	0.463	255	255	255	35.696	78.118	1.025	118.103	100	15300	403	884	120.964	0.621	1.65056
24	0.44	255	255	255	40.726	8.554	1.028	112.198	100	14535	458	95	160.017	0.615	1.67154
156	0.224	255	255	255	45.412	56.128	1.028	57.083	100	7395	515	633	109.983	0.351	2.92877
116	0.224	246.207	0	255	66.85	39.711	1.058	55.115	96.552	7140	757	447	131.634	0.373	2.83646
98	0.409	255	255	255	5.092	24.794	1.062	104.325	100	13515	54	279	155.556	0.703	1.51067
39	0.363	255	255	255	51.254	11.387	1.069	92.514	100	11985	577	130	9.462	0.527	2.02846
72	0.262	255	255	255	52.584	18.215	1.069	66.925	100	8670	598	201	99.462	0.264	4.04924
91	0.386	255	255	255	45.72	21.963	1.069	98.419	100	12750	519	244	99.462	0.439	2.43508
235	0.247	255	255	255	45.431	75.128	1.069	62.988	100	8160	516	861	80.538	0.347	3.08069
254	0.224	255	255	255	33.036	78.602	1.069	57.083	100	7395	375	888	99.462	0.351	3.04558
103	0.316	255	255	255	57.341	28.448	1.072	80.704	100	10455	649	329	55.008	0.471	2.27601
100	0.247	255	255	255	38.367	26.053	1.087	62.988	100	8160	430	298	14.036	0.378	2.87566
169	0.394	255	255	255	19.664	58.081	1.101	100.388	100	13005	220	656	151.39	0.723	1.52282
201	0.293	255	255	255	38.154	65.2	1.101	74.799	100	9690	432	737	118.61	0.435	2.53103
222	0.232	255	255	255	23.965	71.576	1.101	59.052	100	7650	268	818	28.61	0.381	2.88976
8	0.208	255	255	255	84.493	3.09	1.111	53.146	100	6885	960	41	71.565	0.294	3.77891
46	0.309	255	255	255	39.172	13.482	1.125	78.736	100	10200	442	158	51.34	0.435	2.58621
94	0.618	255	255	255	10.384	23.761	1.125	157.471	100	20400	114	276	51.34	0.879	1.27986
271	0.278	255	255	255	84.645	87.273	1.125	70.862	100	9180	959	997	38.66	0.504	2.23214
113	0.378	255	255	255	71.457	37.954	1.142	96.451	100	12495	806	431	157.38	0.661	1.72769
92	0.286	255	255	255	47.64	22.032	1.156	72.83	100	9435	541	258	81.254	0.351	3.29345
206	0.587	255	255	255	47.859	66.066	1.182	149.598	100	19380	540	757	41.987	0.746	1.58445
108	0.232	255	255	255	53.275	34.326	1.195	59.052	100	7650	604	384	107.103	0.335	3.56716
130	0.363	255	255	255	73.974	45.23	1.195	92.514	100	11985	839	508	107.103	0.465	2.56989
154	0.201	255	255	255	43.304	55.665	1.195	51.178	100	6630	487	636	17.103	0.362	3.3011
226	0.602	255	255	255	50.334	73.273	1.195	153.534	100	19890	568	828	126.027	0.808	1.47896
251	0.618	255	255	255	41.987	78.204	1.195	157.471	100	20400	471	893	17.103	0.879	1.3595
122	0.756	255	255	255	64.581	40.904	1.221	192.902	100	24990	729	469	30.256	0.864	1.41319
59	0.394	255	255	255	72.314	16.691	1.243	100.388	100	13005	821	183	98.13	0.602	2.06478
99	0.201	255	255	255	31.734	25.08	1.243	51.178	100	6630	356	291	45	0.343	3.62391
164	0.533	255	255	255	24.189	57.127	1.258	135.819	100	17595	268	648	167.905	0.615	2.04553
129	0.826	252.617	0	255	68.659	44.589	1.267	208.649	99.065	27030	776	503	123.69	1.054	1.20209
63	0.378	255	255	255	36.989	17.594	1.279	96.451	100	12495	419	207	74.055	0.351	3.64387
180	0.448	255	255	255	26.727	60.242	1.297	114.167	100	14790	298	682	151.699	0.511	2.53816
58	0.54	255	255	255	30.53	15.699	1.306	137.787	100	17850	340	180	19.654	0.607	2.15157
145	0.316	255	255	255	1.788	52.253	1.306	80.704	100	10455	16	602	70.346	0.52	2.51154
173	0.394	255	255	255	26.66	59.195	1.306	100.388	100	13005	298	670	160.346	0.615	2.12358
95	0.479	255	255	255	59.269	23.978	1.318	122.04	100	15810	670	279	53.13	0.524	2.51527
214	0.363	255	255	255	78.122	70.043	1.318	92.514	100	11985	883	801	36.87	0.435	3.02989
30	0.509	255	255	255	57.469	9.86	1.338	129.914	100	16830	653	120	66.801	0.724	1.84807
65	0.502	255	255	255	28.858	17.659	1.338	127.945	100	16575	323	205	23.199	0.916	1.4607
126	0.432	255	255	255	73.648	43.15	1.338	110.23	100	14280	834	497	66.801	0.732	1.82787
188	0.425	255	255	255	31.541	62.615	1.341	108.261	100	14025	355	707	121.608	0.791	1.69532
246	0.371	255	255	255	34.766	77.199	1.344	94.483	100	12240	394	871	101.31	0.351	3.82906
89	0.618	255	255	255	31.623	22.072	1.364	157.471	100	20400	357	257	75.069	1.153	1.183
142	0.27	255	255	255	39.887	50.811	1.364	68.894	100	8925	452	571	104.931	0.328	4.15854
144	0.247	255	255	255	38.63	51.968	1.364	62.988	100	8160	437	599	75.069	0.306	4.45752
157	0.502	255	255	255	50.096	55.907	1.364	127.945	100	16575	564	639	14.931	0.615	2.21789
181	0.648	255	255	255	37.829	60.563	1.364	165.345	100	21420	428	696	75.069	0.806	1.69231
105	0.324	255	255	255	54.535	31.458	1.375	82.672	100	10710	617	351	116.565	0.393	3.49873
137	0.239	255	255	255	74.979	48.482	1.375	61.02	100	7905	846	549	153.435	0.405	3.39506
233	0.378	255	255	255	85.174	75.102	1.375	96.451	100	12495	966	847	116.565	0.47	2.92553
236	0.502	255	255	255	46.297	75.175	1.375	127.945	100	16575	522	849	116.565	0.725	1.89655
270	0.316	255	255	255	83.143	87.181	1.389	80.704	100	10455	940	988	145.305	0.382	3.63613
31	0.517	255	255	255	34.603	10.343	1.419	131.882	100	17085	393	126	68.199	0.757	1.8745
252	0.494	255	255	255	32.192	78.4	1.419	125.977	100	16320	362	885	111.801	0.597	2.37688
17	0.54	255	255	255	51.656	7.398	1.43	137.787	100	17850	582	90	42.51	0.554	2.58123
168	0.525	255	255	255	54.523	57.741	1.43	133.85	100	17340	613	659	10.62	0.527	2.71347
50	0.355	255	255	255	44.695	14.523	1.441	90.546	100	11730	504	172	52.431	0.373	3.86327
21	0.594	255	255	255	48.312	8.331	1.449	151.566	100	19635	542	97	14.036	0.629	2.30366
27	0.726	255	255	255	48.66	9.174	1.449	185.029	100	23970	547	107	14.036	0.791	1.83186
162	0.386	255	255	255	50.188	57.168	1.449	98.419	100	12750	569	643	104.036	0.351	4.12821
186	0.733	255	255	255	18.029	62.341	1.473	186.997	100	24225	197	712	17.354	0.889	1.65692
272	0.463	255	255	255	85.929	87.374	1.473	118.103	100	15300	970	993	162.646	0.491	3
102	0.525	255	255	255	72.81	27.02	1.496	133.85	100	17340	827	300	93.366	0.769	1.94538
11	0.888	255	255	255	87.051	4.564	1.504	226.365	100	29325	982	54	6.71	1.118	1.34526
193	0.417	255	255	255	39.741	63.777	1.512	106.293	100	13770	445	721	144.462	0.559	2.70483
187	0.371	255	255	255	34.843	62.235	1.517	94.483	100	12240	388	710	10.008	0.388	3.90979
133	0.378	255	255	255	76.915	46.516	1.534	96.451	100	12495	872	537	76.759	0.465	3.29892
178	0.633	255	255	255	51.089	59.927	1.534	161.408	100	20910	572	681	166.759	0.676	2.26923
34	0.309	255	255	255	47.483	10.341	1.537	78.736	100	10200	533	122	30.964	0.379	4.05541
127	0.571	255	255	255	74.807	43.712	1.557	145.661	100	18870	842	500	16.39	0.791	1.96839
121	0.625	255	255	255	66.851	40.995	1.584	159.439	100	20655	758	457	109.44	0.791	2.00253
195	0.432	255	255	255	49.262	64.242	1.584	110.23	100	14280	553	727	146.31	0.791	2.00253
6	0.594	255	255	255	80.964	3.141	1.591	151.566	100	19635	921	27	96.34	0.439	3.62415
49	0.54	255	255	255	56.478	14.708	1.591	137.787	100	17850	642	158	96.34	0.563	2.82593
81	0.432	255	255	255	36.796	19.72	1.603	110.23	100	14280	417	233	80.538	0.439	3.65148
249	0.54	255	255	255	77.554	77.532	1.603	137.787	100	17850	874	884	9.462	0.508	3.15551
238	0.664	255	255	255	89.334	75.356	1.613	169.281	100	21930	1008	854	150.642	0.631	2.55626
266	0.54	255	255	255	82.871	83.652	1.613	137.787	100	17850	941	943	119.358	0.702	2.29772
262	0.895	255	255	255	86.569	81.163	1.62	228.333	100	29580	982	932	77.471	1.084	1.49446
110	0.702	255	255	255	59.481	36.79	1.634	179.123	100	23205	671	425	53.746	0.792	2.06313
221	0.579	255	255	255	44.379	71.361	1.634	147.629	100	19125	497	807	143.746	0.55	2.97091
190	1.289	255	255	255	43.301	63.015	1.651	328.721	100	42585	485	713	154.799	1.118	1.47674
143	0.78	255	255	255	47.763	51.748	1.658	198.807	100	25755	537	580	147.995	1.161	1.42808
269	0.448	255	255	255	79.909	86.156	1.658	114.167	100	14790	905	988	57.995	0.439	3.77677
43	0.625	255	255	255	18.896	12.802	1.688	159.439	100	20655	209	152	51.34	0.786	2.14758
205	0.811	255	255	255	49.344	66.276	1.69	206.681	100	26775	562	765	81.027	0.784	2.15561
62	1.05	255	255	255	43.399	17.323	1.697	267.701	100	34680	485	193	158.749	1.193	1.42246
147	1.135	255	255	255	34.116	53.14	1.706	289.353	100	37485	386	596	101.889	0.879	1.94084
153	0.502	255	255	255	30.731	55.371	1.706	127.945	100	16575	341	630	11.889	0.595	2.86723
248	0.54	255	255	255	73.145	77.406	1.706	137.787	100	17850	825	884	11.889	0.527	3.23719
52	0.232	255	255	255	63.973	15.132	1.731	59.052	100	7650	725	163	113.962	0.332	5.21386
73	0.494	255	255	255	49.6	18.743	1.731	125.977	100	16320	560	223	66.038	0.465	3.72258
268	0.533	255	255	255	85.285	84.455	1.733	135.819	100	17595	961	965	30.466	0.6	2.88833
45	0.911	255	255	255	40.643	13.056	1.744	232.27	100	30090	456	155	40.914	0.81	2.15309
132	0.548	255	255	255	60.95	45.64	1.744	139.756	100	18105	686	514	139.086	0.715	2.43916
35	0.371	255	255	255	37.382	10.733	1.751	94.483	100	12240	415	126	17.526	0.469	3.73348
231	0.525	255	255	255	24.442	73.745	1.751	133.85	100	17340	268	838	162.474	0.65	2.69385
66	0.934	255	255	255	39.155	17.844	1.757	238.175	100	30855	441	195	126.87	0.914	1.92232
160	0.872	255	255	255	31.525	56.909	1.768	222.428	100	28815	350	647	153.435	1.202	1.47088
26	0.301	255	255	255	29.488	9.767	1.792	76.767	100	9945	334	120	78.69	0.294	6.09524
176	0.818	255	255	255	21.293	59.867	1.792	208.649	100	27030	234	683	11.31	0.772	2.32124
243	1.552	255	255	255	46.667	76.785	1.792	395.646	100	51255	521	875	11.31	1.414	1.26733
19	0.672	255	255	255	32.107	8.604	1.803	171.25	100	22185	354	104	43.025	1.379	1.30747
260	0.34	255	255	255	78.035	80.748	1.803	86.609	100	11220	881	926	46.975	0.311	5.79743
54	0.563	255	255	255	74.483	15.63	1.811	143.692	100	18615	845	187	75.964	0.439	4.12528
74	0.509	255	255	255	54.422	18.792	1.811	129.914	100	16830	611	221	39.094	0.48	3.77292
191	0.664	255	255	255	80.959	63.466	1.811	169.281	100	21930	916	714	129.094	0.633	2.86098
241	1.027	255	255	255	81.885	76.143	1.835	261.796	100	33915	927	876	73.301	1.152	1.59288
85	0.656	255	255	255	71.494	21.2	1.847	167.313	100	21675	808	250	64.654	0.694	2.66138
33	0.957	255	255	255	33.352	10.474	1.868	244.08	100	31620	372	113	131.186	1.212	1.54125
36	0.641	255	255	255	85.606	11.441	1.878	163.376	100	21165	972	140	79.216	0.481	3.90437
14	0.594	255	255	255	89.452	5.273	1.88	151.566	100	19635	1011	53	127.405	0.869	2.16341
56	1.119	255	255	255	40.93	15.929	1.88	285.416	100	36975	460	188	52.595	1.115	1.6861
1	0.949	255	255	255	54.721	0.883	1.893	242.112	100	31365	619	20	68.199	0.773	2.4489
239	0.71	255	255	255	29.989	75.751	1.893	181.092	100	23460	336	854	111.801	0.832	2.27524
134	0.949	255	255	255	77.918	46.608	1.901	242.112	100	31365	880	537	33.69	1.249	1.52202
255	1.158	248.2	0	255	81.321	78.916	1.901	287.385	97.333	37230	917	889	146.31	1.224	1.5531
197	0.695	255	255	255	19.445	64.2	1.927	177.155	100	22950	209	726	155.772	0.791	2.43616
227	0.633	255	255	255	79.077	73.284	1.927	161.408	100	20910	890	830	155.772	0.511	3.77104
183	0.811	255	255	255	32.824	60.697	1.929	206.681	100	26775	363	686	149.931	0.966	1.99689
139	1.251	243.981	0	255	44.689	49.745	1.945	305.1	95.679	39525	506	555	108.435	1.426	1.36396
101	0.61	255	255	255	75.676	26.875	1.951	155.503	100	20145	860	295	97.765	0.439	4.44419
165	1.05	255	255	255	3.87	57.996	1.951	267.701	100	34680	42	651	97.765	0.966	2.01967
149	0.672	255	255	255	48.924	53.586	1.965	171.25	100	22185	545	613	10.305	0.527	3.72865
75	0.656	255	255	255	71.083	19.163	1.974	167.313	100	21675	806	207	110.854	0.62	3.18387
88	1.042	255	255	255	9.633	21.621	1.974	265.732	100	34425	105	258	57.724	1.08	1.82778
141	0.556	255	255	255	76.963	50.325	1.974	141.724	100	18360	865	569	159.146	0.458	4.31004
184	0.718	255	255	255	45.718	61.47	1.992	183.06	100	23715	513	692	131.424	0.858	2.32168
166	0.471	255	255	255	48.07	58.094	2.003	120.072	100	15555	538	667	37.875	0.439	4.56264
158	0.486	255	255	255	35.399	56.064	2.038	124.008	100	16065	390	638	7.431	0.478	4.2636
171	0.764	255	255	255	34.578	59.33	2.057	194.87	100	25245	386	665	109.983	0.931	2.20945
210	0.726	255	255	255	45.421	67.274	2.074	185.029	100	23970	511	776	53.616	0.646	3.21053
167	0.865	255	255	255	36.938	58.519	2.096	220.46	100	28560	416	674	56.976	0.956	2.19247
215	0.98	255	255	255	19.426	70.833	2.112	249.985	100	32385	216	818	73.072	0.75	2.816
4	0.533	255	255	255	60.02	1.883	2.123	135.819	100	17595	677	33	65.556	0.511	4.1546
265	1.258	255	255	255	86.437	82.839	2.125	320.847	100	41565	970	946	29.745	1.652	1.28632
60	1.552	255	255	255	47.732	17.556	2.127	395.646	100	51255	535	209	38.29	1.589	1.33858
68	0.702	255	255	255	40.833	18.18	2.127	179.123	100	23205	456	216	38.29	0.615	3.45854
61	0.834	240.833	0	255	60.791	17.533	2.138	200.776	94.444	26010	689	212	80.538	0.615	3.47642
82	0.803	255	255	255	33.306	19.702	2.145	204.712	100	26520	368	230	34.992	0.739	2.90257
182	1.196	255	255	255	88.844	60.973	2.145	305.1	100	39525	1004	705	55.008	0.896	2.39397
125	1.582	255	255	255	57.978	42.801	2.154	403.52	100	52275	645	489	11.768	1.406	1.53201
135	0.865	255	255	255	71.035	46.753	2.154	220.46	100	28560	795	528	168.232	0.722	2.98338
28	0.849	255	255	255	71.767	10.335	2.161	216.523	100	28050	816	104	116.565	1.361	1.5878
15	0.942	255	255	255	57.717	6.977	2.196	240.143	100	31110	649	91	53.13	0.82	2.67805
179	0.695	255	255	255	19.619	60.631	2.203	177.155	100	22950	219	705	66.501	0.892	2.46973
207	0.556	255	255	255	80.446	66.846	2.224	141.724	100	18360	913	773	80.91	0.406	5.47783
159	0.98	255	255	255	41.052	56.995	2.24	249.985	100	32385	464	663	64.44	1.267	1.76796
16	0.733	255	255	255	34.593	7.449	2.279	186.997	100	24225	387	96	62.447	0.546	4.17399
267	0.903	255	255	255	88.306	84.113	2.299	230.301	100	29835	1002	974	83.418	0.966	2.37992
128	0.988	255	255	255	72.595	44.535	2.306	251.954	100	32640	819	516	40.365	0.994	2.31992
96	1.011	255	255	255	74.763	24.294	2.334	257.859	100	33405	850	293	70.201	1.318	1.77086
10	0.425	255	255	255	30.857	3.892	2.339	108.261	100	14025	340	52	34.287	0.403	5.80397
219	1.443	255	255	255	22.182	71.048	2.366	368.089	100	47685	242	814	15.068	1.23	1.92358
161	0.872	255	255	255	42.159	57.11	2.39	222.428	100	28815	469	660	36.027	0.7	3.41429
5	0.826	255	255	255	34.336	2.733	2.413	210.618	100	27285	391	16	100.491	1.196	2.01756
97	1.019	255	255	255	57.647	25.275	2.441	259.827	100	33660	649	299	59.744	0.664	3.6762
57	1.876	255	255	255	45.807	16.426	2.488	478.318	100	61965	514	172	132.138	1.663	1.49609
123	0.834	255	255	255	72.031	42.673	2.53	212.586	100	27540	815	472	110.323	0.605	4.18182
247	1.914	255	255	255	38.405	77.794	2.536	488.16	100	63240	434	871	104.036	1.568	1.61735
9	0.841	255	255	255	58.59	4.379	2.572	214.554	100	27795	664	36	97.853	0.879	2.92605
13	0.934	255	255	255	56.28	5.734	2.572	238.175	100	30855	643	79	82.147	1.104	2.32971
84	0.625	255	255	255	59.972	20.865	2.594	159.439	100	20655	675	252	61.699	0.471	5.50743
185	0.895	255	255	255	21.51	62.608	2.602	228.333	100	29580	238	698	101.689	1.165	2.23348
119	0.756	255	255	255	7.43	41.365	2.643	192.902	100	24990	81	457	105.422	0.621	4.25604
107	1.096	255	255	255	73.766	34.596	2.672	279.511	100	36210	836	411	80.538	0.791	3.378
199	1.019	255	255	255	51.278	65.605	2.678	259.827	100	33660	574	735	131.009	0.763	3.50983
172	0.996	255	255	255	42.053	59.306	2.707	253.922	100	32895	465	684	35.754	0.683	3.9634
204	1.845	255	255	255	21.528	66.212	2.714	470.445	100	60945	232	761	29.055	1.375	1.97382
258	1.575	255	255	255	88.226	79.804	2.736	401.551	100	52020	991	905	174.472	1.12	2.44286
151	1.984	254.008	0	255	25.654	55.787	2.778	503.908	99.611	65280	276	640	18.435	1.501	1.85077
18	2.061	255	255	255	53.1	9.127	2.792	525.56	100	68085	600	85	102.724	1.73	1.61387
263	0.996	255	255	255	84.446	80.971	2.792	253.922	100	32895	944	924	12.724	0.789	3.53866
209	2.115	255	255	255	18.864	67.128	2.869	539.339	100	69870	207	751	117.35	1.889	1.51879
177	1.559	255	255	255	36.731	60.664	2.925	397.615	100	51510	406	684	147.265	1.719	1.70157
120	1.474	248.325	0	255	63.208	41.076	2.999	366.12	97.382	47430	710	487	58.173	1.218	2.46223
111	1.034	255	255	255	75.258	37.587	3.023	263.764	100	34170	845	412	125.538	0.951	3.17876
220	1.907	255	255	255	46.417	72.097	3.069	486.192	100	62985	521	806	113.629	1.168	2.62757
140	2.231	254.118	0	255	35.94	51.014	3.075	566.896	99.654	73440	391	589	53.13	2.458	1.25102
104	1.266	255	255	255	55.256	30.431	3.08	322.816	100	41820	629	329	93.27	0.953	3.2319
42	1.968	255	255	255	51.326	13.295	3.085	501.939	100	65025	563	153	160.017	2.407	1.28168
230	1.752	255	255	255	73.57	75.023	3.086	446.824	100	57885	844	834	94.899	2.316	1.33247
150	1.127	255	255	255	43.566	54.805	3.09	287.385	100	37230	478	623	165.174	0.998	3.09619
118	1.42	255	255	255	74.902	40.925	3.106	362.184	100	46920	838	453	135	1.327	2.34062
213	1.968	255	255	255	49.872	70.522	3.12	501.939	100	65025	562	822	80.272	1.635	1.90826
32	1.876	255	255	255	40.963	10.414	3.207	478.318	100	61965	446	121	9.462	1.152	2.78385
83	1.945	255	255	255	43.829	20.712	3.233	496.034	100	64260	482	226	137.203	2.485	1.30101
3	1.142	255	255	255	87.952	1.551	3.28	291.322	100	37740	1001	0	97.696	1.077	3.0455
86	1.636	255	255	255	51.192	21.066	3.391	417.298	100	54060	561	233	163.443	0.995	3.40804
87	1.698	255	255	255	43.042	22.801	3.422	433.046	100	56100	483	238	119.197	1.229	2.78438
148	1.66	255	255	255	50.928	54.001	3.488	423.204	100	54825	563	623	40.914	1.468	2.37602
79	1.636	255	255	255	38.76	20.56	3.514	417.298	100	54060	426	213	126.87	1.167	3.01114
64	1.505	255	255	255	72.086	18.29	3.529	383.836	100	49725	811	194	108.886	1.256	2.80971
189	0.973	255	255	255	88.129	62.91	3.774	248.017	100	32130	984	726	24.775	0.604	6.24834
232	2.702	246.257	0	255	41.818	76	3.793	665.315	96.571	86190	473	883	76.608	1.392	2.72486
196	1.76	255	255	255	52.547	65.034	3.801	448.793	100	58140	583	727	123.69	1.264	3.00712
192	2.686	255	255	255	41.537	64.762	3.9	684.999	100	88740	459	715	112.521	2.097	1.8598
256	4.145	254.05	0	255	75.509	80.226	3.949	1053.09	99.628	136425	849	895	122.276	2.919	1.35286
25	2.995	254.343	0	255	50.922	9.942	3.976	761.766	99.742	98685	564	102	135	2.544	1.56289
174	4.585	252.854	0	255	39.64	61.111	4.07	1159.38	99.158	150195	443	673	103.736	2.151	1.89214
124	2.972	255	255	255	66.945	43.399	4.102	757.83	100	98175	736	480	136.736	3.239	1.26644
38	2.987	255	255	255	54.197	11.544	4.309	761.766	100	98685	594	142	16.587	1.685	2.55727
264	2.833	255	255	255	79.712	82.647	4.327	722.399	100	93585	882	950	23.962	2.203	1.96414
136	1.305	253.491	0	255	75.625	47.745	4.341	330.689	99.408	42840	841	529	144.058	0.976	4.44775
51	1.297	255	255	255	73.281	16.565	4.349	330.689	100	42840	832	210	81.87	0.661	6.57943
53	2.609	255	255	255	39.151	16.313	4.508	665.315	100	86190	428	207	56.929	2.959	1.52349
55	3.373	255	255	255	35.947	17.006	4.586	860.186	100	111435	385	210	36.431	2.02	2.2703
175	3.319	251.442	0	255	44.174	60.338	4.677	834.597	98.605	108120	476	691	5.389	2.318	2.01769
261	1.698	255	255	255	77.828	82.017	5.096	433.046	100	56100	860	953	43.603	0.999	5.1011
47	6.26	219.784	0	255	53.529	15.428	5.385	1375.9	86.19	178245	584	176	174.382	3.396	1.58569
76	4.562	255	255	255	41.366	21.506	5.422	1163.32	100	150705	456	266	63.02	2.485	2.18189
138	8.013	232.645	0	255	42.371	51.129	5.546	1864.06	91.233	241485	461	555	139.497	4.543	1.22078
35	0.201	255	255	255	89.528	13.75	0.589	51.178	100	6630	1016	155	153.435	0.439	1.34169
230	0.201	255	255	255	71.473	55.175	0.589	51.178	100	6630	812	625	116.565	0.439	1.34169
108	0.201	255	255	255	72.004	33.522	0.634	51.178	100	6630	818	378	123.69	0.527	1.20304
123	0.247	255	255	255	81.709	35.319	0.634	62.988	100	8160	928	399	123.69	0.527	1.20304
191	0.293	255	255	255	85.033	45.996	0.708	74.799	100	9690	966	520	119.745	0.611	1.15876
192	0.224	255	255	255	25.462	46.091	0.708	57.083	100	7395	286	526	29.745	0.439	1.61276
227	0.293	255	255	255	10.599	53.908	0.708	74.799	100	9690	117	612	150.255	0.615	1.15122
273	0.232	255	255	255	25.699	65.443	0.708	59.052	100	7650	290	748	60.255	0.511	1.38552
325	0.278	255	255	255	84.696	84.652	0.708	70.862	100	9180	962	967	60.255	0.527	1.34345
209	0.286	255	255	255	76.36	49.544	0.725	72.83	100	9435	868	568	75.964	0.527	1.37571
125	0.201	255	255	255	60.318	35.539	0.751	51.178	100	6630	685	401	110.556	0.439	1.71071
151	0.232	255	255	255	69.701	38.716	0.751	59.052	100	7650	792	445	69.444	0.439	1.71071
263	0.34	255	255	255	77.184	63.083	0.751	86.609	100	11220	877	714	110.556	0.615	1.22114
67	0.232	255	255	255	18.38	22.152	0.756	59.052	100	7650	206	255	54.462	0.527	1.43454
185	0.208	255	255	255	22.526	45.083	0.756	53.146	100	6885	253	515	35.538	0.435	1.73793
253	0.316	255	255	255	87.08	60.733	0.756	80.704	100	10455	989	695	54.462	0.615	1.22927
279	0.201	255	255	255	85.774	66.695	0.756	51.178	100	6630	974	755	125.538	0.467	1.61884
235	0.208	255	255	255	13.203	56.905	0.786	53.146	100	6885	146	649	26.565	0.439	1.79043
264	0.316	255	255	255	69.035	63.514	0.786	80.704	100	10455	783	719	116.565	0.527	1.49146
18	0.332	255	255	255	14.236	8.578	0.81	84.641	100	10965	159	101	40.601	0.615	1.31707
38	0.255	255	255	255	50.038	14.855	0.81	64.957	100	8415	567	173	49.399	0.527	1.537
161	0.239	255	255	255	74.834	40.949	0.81	61.02	100	7905	847	466	167.471	0.439	1.8451
302	0.309	255	255	255	84.037	72.044	0.81	78.736	100	10200	952	819	167.471	0.527	1.537
331	0.293	255	255	255	81.172	86.957	0.81	74.799	100	9690	919	989	167.471	0.615	1.31707
25	0.27	255	255	255	0.222	9.774	0.829	68.894	100	8925	0	107	122.005	0.527	1.57306
247	0.255	255	255	255	6.868	59.929	0.829	64.957	100	8415	76	678	122.005	0.492	1.68496
326	0.378	255	255	255	85.244	86.472	0.829	96.451	100	12495	968	980	122.005	0.695	1.19281
162	0.201	255	255	255	48.545	41.324	0.834	51.178	100	6630	551	466	108.435	0.264	3.15909
244	0.401	255	255	255	84.946	59.534	0.834	102.356	100	13260	966	673	108.435	0.703	1.18634
313	0.262	255	255	255	8.484	76.326	0.834	66.925	100	8670	92	867	161.565	0.5	1.668
155	0.324	255	255	255	85.934	39.836	0.865	82.672	100	10710	976	449	113.962	0.527	1.64137
87	0.224	255	255	255	35.696	28.934	0.879	57.083	100	7395	403	333	53.13	0.393	2.23664
177	0.355	255	255	255	83.987	43.998	0.879	90.546	100	11730	953	497	126.87	0.615	1.42927
299	0.255	255	255	255	80.371	70.203	0.879	64.957	100	8415	912	803	53.13	0.432	2.03472
311	0.232	255	255	255	34.772	75.746	0.879	59.052	100	7650	393	866	53.13	0.373	2.35657
190	0.216	255	255	255	69.211	45.856	0.896	55.115	100	7140	786	518	101.31	0.439	2.041
214	0.201	255	255	255	52.188	50.695	0.896	51.178	100	6630	593	582	78.69	0.341	2.62757
316	0.216	255	255	255	66.032	78.37	0.896	55.115	100	7140	751	887	101.31	0.264	3.39394
174	0.309	255	255	255	16.946	44.114	0.905	78.736	100	10200	189	505	60.945	0.609	1.48604
29	0.262	255	255	255	5.352	11.478	0.917	66.925	100	8670	60	136	73.301	0.351	2.61254
107	0.201	255	255	255	38.202	33.444	0.917	51.178	100	6630	430	380	163.301	0.398	2.30402
109	0.386	255	255	255	25.53	33.699	0.917	98.419	100	12750	289	379	106.699	0.788	1.16371
128	0.224	255	255	255	81.371	36.457	0.917	57.083	100	7395	925	410	106.699	0.351	2.61254
276	0.232	255	255	255	22.501	65.92	0.917	59.052	100	7650	255	756	73.301	0.439	2.08884
34	0.425	255	255	255	76.869	13.652	0.934	108.261	100	14025	871	160	41.186	0.791	1.18078
12	0.34	255	255	255	18.742	6.242	0.946	86.609	100	11220	211	76	68.199	0.439	2.1549
295	0.262	255	255	255	18.014	69.84	0.946	66.925	100	8670	199	794	158.199	0.689	1.373
334	0.309	255	255	255	3.666	89.53	0.946	78.736	100	10200	40	1024	68.199	0.511	1.85127
42	0.232	255	255	255	85.677	16.099	0.95	59.052	100	7650	970	180	146.31	0.477	1.99161
221	0.278	255	255	255	0.344	52.442	0.95	70.862	100	9180	0	593	146.31	0.471	2.01699
252	0.509	255	255	255	75.634	60.84	0.95	129.914	100	16830	857	696	56.31	0.791	1.20101
195	0.486	255	255	255	89.678	46.735	0.982	124.008	100	16065	1019	537	63.435	0.615	1.59675
201	0.309	255	255	255	51.288	48.274	0.982	78.736	100	10200	579	548	169.695	0.439	2.2369
243	0.332	255	255	255	7.759	59.439	0.982	84.641	100	10965	83	679	26.565	0.534	1.83895
188	0.309	255	255	255	28.179	45.75	1.002	78.736	100	10200	318	515	105.255	0.506	1.98024
215	0.355	255	255	255	88.814	50.96	1.002	90.546	100	11730	1006	583	37.875	0.597	1.67839
241	0.34	255	255	255	52.302	58.396	1.002	86.609	100	11220	594	659	105.255	0.439	2.28246
318	0.208	255	255	255	28.894	80.425	1.002	53.146	100	6885	326	910	127.875	0.435	2.30345
178	0.448	255	255	255	61.848	44.196	1.025	114.167	100	14790	701	508	59.036	0.683	1.50073
200	0.27	255	255	255	58.45	48.196	1.025	68.894	100	8925	663	543	120.964	0.393	2.60814
232	0.494	255	255	255	72.512	55.473	1.025	125.977	100	16320	823	637	59.036	0.778	1.31748
289	0.371	255	255	255	88.271	68.572	1.025	94.483	100	12240	1001	776	120.964	0.559	1.83363
62	0.232	255	255	255	28.519	21.104	1.028	59.052	100	7650	319	243	19.983	0.376	2.73404
132	0.208	255	255	255	25.09	37.316	1.028	53.146	100	6885	284	418	109.983	0.351	2.92877
262	0.641	255	255	255	86.79	63.082	1.028	163.376	100	21165	982	716	160.017	0.879	1.16951
309	0.293	255	255	255	6.539	75.448	1.028	74.799	100	9690	72	853	109.983	0.527	1.95066
51	0.239	255	255	255	36.794	18.67	1.058	61.02	100	7905	414	208	138.366	0.422	2.50711
237	0.656	255	255	255	88.365	57.327	1.058	167.313	100	21675	1002	648	131.634	0.926	1.14255
287	0.556	255	255	255	86.751	68.121	1.058	141.724	100	18360	984	770	131.634	0.791	1.33755
57	0.201	255	255	255	53.705	20.093	1.062	51.178	100	6630	609	234	65.556	0.331	3.20846
225	0.247	255	255	255	47.724	53.52	1.062	62.988	100	8160	541	603	114.444	0.426	2.49296
250	0.278	255	255	255	28.4	60.745	1.062	70.862	100	9180	321	697	65.556	0.439	2.41913
66	0.355	255	255	255	67.974	22.135	1.069	90.546	100	11730	771	246	99.462	0.527	2.02846
176	0.44	255	255	255	26.184	44.222	1.069	112.198	100	14535	299	497	99.462	0.769	1.39012
44	0.409	255	255	255	54.624	16.858	1.072	104.325	100	13515	617	187	145.008	0.848	1.26415
56	0.224	255	255	255	38.06	20	1.072	57.083	100	7395	430	232	55.008	0.373	2.87399
81	0.432	255	255	255	4.594	26.537	1.072	110.23	100	14280	47	305	34.992	0.611	1.7545
143	0.293	255	255	255	44.757	38.216	1.072	74.799	100	9690	505	440	55.008	0.559	1.91771
222	0.409	255	255	255	86.538	52.945	1.087	104.325	100	13515	984	609	75.964	0.527	2.06262
274	0.525	255	255	255	21.381	65.872	1.087	133.85	100	17340	241	756	75.964	0.703	1.54623
314	0.224	255	255	255	62.463	76.545	1.101	57.083	100	7395	708	867	118.61	0.455	2.41978
3	0.247	255	255	255	3.608	1.483	1.111	62.988	100	8160	39	11	108.435	0.327	3.39755
91	0.34	255	255	255	31.328	30.1	1.111	86.609	100	11220	350	341	161.565	0.477	2.32914
199	0.371	255	255	255	69.815	47.402	1.111	94.483	100	12240	792	534	108.435	0.52	2.13654
206	0.309	255	255	255	8.153	49.403	1.111	78.736	100	10200	90	568	71.565	0.414	2.68357
280	0.324	255	255	255	87.173	67.166	1.111	82.672	100	10710	991	758	108.435	0.471	2.35881
307	0.44	255	255	255	61.269	74.867	1.111	112.198	100	14535	695	858	71.565	0.527	2.10816
7	0.262	255	255	255	25.234	3.706	1.125	66.925	100	8670	282	46	38.66	0.369	3.04878
68	0.239	255	255	255	56.713	22.278	1.142	61.02	100	7905	644	260	67.38	0.535	2.13458
89	0.401	255	255	255	4.798	29.321	1.142	102.356	100	13260	48	336	22.62	0.527	2.16698
103	0.347	255	255	255	69.763	33.19	1.156	88.577	100	11475	792	385	81.254	0.439	2.63326
106	0.602	255	255	255	78.061	33.489	1.156	153.534	100	19890	888	375	98.746	0.791	1.46144
321	0.224	255	255	255	33.445	83.358	1.156	57.083	100	7395	374	950	8.746	0.301	3.84053
268	0.27	255	255	255	18.831	64.713	1.172	68.894	100	8925	208	739	12.995	0.439	2.6697
298	0.216	255	255	255	36.578	70.416	1.172	55.115	100	7140	415	808	77.005	0.264	4.43939
216	0.888	255	255	255	86.168	51.457	1.182	226.365	100	29325	976	581	131.987	0.966	1.2236
48	0.471	255	255	255	50.386	17.819	1.195	120.072	100	15555	568	208	36.027	0.632	1.89082
90	0.34	255	255	255	68.484	29.976	1.195	86.609	100	11220	773	343	17.103	0.439	2.7221
135	0.239	255	255	255	25.767	37.557	1.195	61.02	100	7905	292	435	72.897	0.583	2.04974
137	0.324	255	255	255	54.621	37.618	1.195	82.672	100	10710	614	431	17.103	0.73	1.63699
141	0.509	255	255	255	71.642	37.818	1.195	129.914	100	16830	811	435	36.027	0.661	1.80787
164	0.34	255	255	255	33.808	41.781	1.195	86.609	100	11220	381	470	107.103	0.702	1.70228
248	0.571	255	255	255	78.186	60.586	1.195	145.661	100	18870	888	696	72.897	0.784	1.52423
294	0.378	255	255	255	84.154	69.592	1.195	96.451	100	12495	952	789	143.973	0.523	2.28489
303	0.201	255	255	255	8.87	73.311	1.195	51.178	100	6630	97	840	53.973	0.378	3.16138
175	0.262	255	255	255	56.258	44.159	1.221	66.925	100	8670	637	508	59.744	0.392	3.1148
226	0.602	255	255	255	83.102	54.028	1.221	153.534	100	19890	942	609	120.256	0.746	1.63673
322	0.355	255	255	255	63.321	84.514	1.224	90.546	100	11730	720	967	68.962	0.751	1.62983
72	0.417	255	255	255	70.18	23.559	1.243	106.293	100	13770	799	261	98.13	0.439	2.83144
126	0.27	255	255	255	24.469	36.121	1.243	68.894	100	8925	278	404	98.13	0.264	4.70833
233	0.224	255	255	255	14.41	56.761	1.243	57.083	100	7395	163	653	81.87	0.31	4.00968
149	0.432	255	255	255	3.98	38.777	1.249	110.23	100	14280	38	445	39.289	0.683	1.8287
308	0.239	255	255	255	31.931	75.228	1.249	61.02	100	7905	358	862	50.711	0.407	3.0688
77	0.425	255	255	255	72.628	25.499	1.258	108.261	100	14025	824	282	114.775	0.703	1.78947
220	0.479	255	255	255	44.119	52.467	1.258	122.04	100	15810	501	604	77.905	0.527	2.3871
304	0.556	255	255	255	6.276	74.006	1.258	141.724	100	18360	69	848	65.225	0.791	1.59039
329	0.316	255	255	255	79.974	86.827	1.258	80.704	100	10455	904	984	155.225	0.604	2.08278
196	0.448	255	255	255	44.096	46.961	1.267	114.167	100	14790	498	529	123.69	0.545	2.32477
258	0.394	255	255	255	10.341	62.506	1.267	100.388	100	13005	114	717	56.31	0.559	2.26655
20	0.309	255	255	255	4.573	9.179	1.279	78.736	100	10200	50	112	74.055	0.439	2.91344
242	0.54	255	255	255	27.094	58.906	1.279	137.787	100	17850	301	673	15.945	0.655	1.95267
283	0.517	255	255	255	88.506	67.813	1.297	131.882	100	17085	1001	769	151.699	0.609	2.12972
37	0.247	255	255	255	40.528	14.167	1.306	62.988	100	8160	455	167	42.274	0.435	3.0023
85	0.471	255	255	255	38.932	27.38	1.306	120.072	100	15555	436	314	19.654	0.524	2.49237
224	0.293	255	255	255	1.905	53.284	1.306	74.799	100	9690	19	614	70.346	0.494	2.64372
228	0.293	255	255	255	6.305	54.408	1.306	74.799	100	9690	69	612	109.654	0.36	3.62778
76	0.309	255	255	255	66.975	25.325	1.318	78.736	100	10200	758	282	126.87	0.373	3.53351
129	0.316	255	255	255	85.576	36.514	1.318	80.704	100	10455	968	410	143.13	0.438	3.00913
154	0.363	255	255	255	3.786	40.014	1.33	92.514	100	11985	40	449	97.595	0.791	1.68142
8	0.262	255	255	255	3.041	4.331	1.338	66.925	100	8670	32	41	113.199	0.49	2.73061
59	0.34	255	255	255	60.523	21.208	1.338	86.609	100	11220	686	248	66.801	0.441	3.03401
157	0.386	255	255	255	18.649	40.097	1.338	98.419	100	12750	206	451	156.801	0.595	2.24874
208	0.625	255	255	255	33.23	49.456	1.341	159.439	100	20655	372	559	148.392	0.738	1.81707
113	0.672	255	255	255	76.759	34.147	1.344	171.25	100	22185	871	382	101.31	0.994	1.35211
255	0.347	255	255	255	47.884	61.826	1.344	88.577	100	11475	544	712	78.69	0.351	3.82906
180	0.533	255	255	255	2.177	44.558	1.372	135.819	100	17595	19	513	50.194	0.603	2.27529
61	0.425	255	255	255	88.208	21.288	1.375	108.261	100	14025	999	250	63.435	0.583	2.35849
257	0.54	255	255	255	77.982	62.155	1.375	137.787	100	17850	881	704	153.435	0.667	2.06147
26	0.293	255	255	255	43.227	10.58	1.389	74.799	100	9690	487	127	55.305	0.432	3.21528
33	0.378	255	255	255	39.959	13.519	1.389	96.451	100	12495	452	161	71.565	0.481	2.88773
100	0.641	255	255	255	68.047	32.239	1.389	163.376	100	21165	773	359	108.435	0.762	1.82283
1	0.463	255	255	255	9.498	0.602	1.417	118.103	100	15300	104	14	60.255	0.629	2.25278
104	0.401	255	255	255	2.381	33.381	1.417	102.356	100	13260	23	387	60.255	0.471	3.00849
82	0.425	255	255	255	61.556	26.846	1.43	108.261	100	14025	695	311	47.49	0.534	2.6779
254	0.494	255	255	255	89.497	61.45	1.43	125.977	100	16320	1012	695	137.49	0.585	2.44444
291	0.394	255	255	255	82.623	69.189	1.43	100.388	100	13005	938	779	100.62	0.435	3.28736
306	0.479	255	255	255	33.796	74.628	1.43	122.04	100	15810	380	855	42.51	0.787	1.81703
172	0.664	249.07	0	255	22.552	43.852	1.441	165.345	97.674	21420	251	505	52.431	0.904	1.59403
184	0.633	255	255	255	85.068	45.18	1.454	161.408	100	20910	962	510	154.983	0.756	1.92328
114	0.548	255	255	255	75.44	34.464	1.473	139.756	100	18105	856	401	72.646	0.557	2.64452
189	0.556	255	255	255	46.901	45.979	1.473	141.724	100	18360	530	531	72.646	0.582	2.53093
46	0.548	255	255	255	47.882	17.692	1.496	139.756	100	18105	538	197	139.764	0.738	2.0271
27	0.44	255	255	255	48.09	10.798	1.501	112.198	100	14535	545	131	69.444	0.438	3.42694
71	0.872	255	255	255	60.025	23.544	1.501	222.428	100	28815	679	261	110.556	0.922	1.62798
58	0.34	255	255	255	52.448	20.894	1.504	86.609	100	11220	596	248	83.29	0.439	3.42597
75	0.463	255	255	255	73.659	24.838	1.512	118.103	100	15300	831	280	144.462	0.747	2.0241
181	0.347	255	255	255	20.831	44.459	1.534	88.577	100	11475	229	509	23.629	0.417	3.67866
73	0.664	255	255	255	38.099	23.768	1.537	169.281	100	21930	427	263	120.964	0.747	2.05756
80	0.401	255	255	255	59.84	26.685	1.537	102.356	100	13260	676	296	120.964	0.471	3.26327
319	0.394	255	255	255	33.132	80.814	1.537	100.388	100	13005	369	917	149.036	0.687	2.23726
23	0.363	255	255	255	46.082	9.492	1.554	92.514	100	11985	517	102	137.291	0.476	3.26471
133	0.409	255	255	255	10.423	37.606	1.557	104.325	100	13515	115	420	106.39	0.565	2.75575
36	0.324	255	255	255	82.661	13.988	1.564	82.672	100	10710	933	166	38.157	0.485	3.22474
30	0.494	255	255	255	52.249	12.856	1.572	125.977	100	16320	590	153	63.435	0.558	2.8172
63	0.432	255	255	255	26.954	21.98	1.584	110.23	100	14280	302	259	70.56	0.65	2.43692
205	0.888	255	255	255	88.189	49.149	1.584	226.365	100	29325	1003	553	93.18	1.271	1.24626
249	0.525	255	255	255	66.541	60.754	1.584	133.85	100	17340	752	699	56.31	0.629	2.51828
218	0.425	255	255	255	7.411	52.628	1.603	108.261	100	14025	83	590	99.462	0.437	3.66819
17	0.509	255	255	255	12.831	8.653	1.613	129.914	100	16830	141	90	119.358	0.502	3.21315
19	0.371	255	255	255	5.87	9.108	1.615	94.483	100	12240	62	95	112.38	0.455	3.54945
146	0.563	255	255	255	36.652	38.751	1.615	143.692	100	18615	413	432	135	1.094	1.47623
166	0.834	255	255	255	84.863	42.45	1.615	212.586	100	27540	963	474	112.38	1.172	1.37799
193	0.934	255	255	255	48.093	46.796	1.615	238.175	100	30855	545	524	112.38	0.879	1.83732
97	0.455	255	255	255	1.378	32.035	1.62	116.135	100	15045	14	356	102.529	0.439	3.69021
207	0.633	255	255	255	77.904	49.421	1.62	161.408	100	20910	880	556	130.601	0.596	2.71812
78	0.787	255	255	255	73.612	26.479	1.634	200.776	100	26010	832	293	143.746	1.26	1.29683
282	0.509	255	255	255	81.509	67.871	1.634	129.914	100	16830	920	779	36.254	0.527	3.10057
101	0.355	255	255	255	18.836	31.984	1.651	90.546	100	11730	206	368	25.201	0.338	4.88462
64	0.502	255	255	255	35.693	22.198	1.658	127.945	100	16575	400	261	57.995	0.943	1.75822
15	0.594	255	255	255	28.237	7.522	1.667	151.566	100	19635	311	83	161.565	0.848	1.9658
202	0.533	255	255	255	81.755	48.803	1.667	135.819	100	17595	927	547	108.435	0.517	3.22437
288	0.556	255	255	255	86.109	68.887	1.667	141.724	100	18360	976	776	108.435	0.544	3.06434
127	0.417	255	255	255	76.637	36.452	1.679	106.293	100	13770	873	427	83.991	0.703	2.38834
213	0.795	255	255	255	13.554	51.057	1.679	202.744	100	26265	151	570	96.009	1.367	1.22824
290	0.463	255	255	255	0.575	69.028	1.679	118.103	100	15300	2	778	132.879	0.559	3.00358
131	0.479	255	255	255	53.109	37.296	1.688	122.04	100	15810	599	416	128.66	0.583	2.89537
79	0.371	249.688	0	255	28.508	26.877	1.69	92.514	97.917	11985	323	296	98.973	0.387	4.36693
168	0.563	255	255	255	52.195	43.311	1.69	143.692	100	18615	592	503	81.027	0.525	3.21905
210	0.756	255	255	255	45.712	50.253	1.69	192.902	100	24990	519	562	98.973	0.615	2.74797
269	0.841	255	255	255	4.078	65.194	1.69	214.554	100	27795	39	747	27.897	0.747	2.26238
330	0.262	255	255	255	82.391	87.115	1.697	66.925	100	8670	934	1001	68.749	0.31	5.47419
32	0.54	255	255	255	4.316	13.746	1.706	137.787	100	17850	46	146	101.889	0.646	2.64087
284	0.409	255	255	255	20.275	67.776	1.706	104.325	100	13515	222	774	11.889	0.527	3.23719
292	0.571	255	255	255	7.278	69.839	1.751	145.661	100	18870	80	785	107.526	0.5	3.502
158	0.618	255	255	255	73.815	40.542	1.766	157.471	100	20400	839	452	95.711	0.496	3.56048
328	0.556	255	255	255	87.905	87.071	1.768	141.724	100	18360	996	1000	63.435	0.472	3.74576
267	0.726	255	255	255	81.146	64.765	1.777	185.029	100	23970	912	741	8.531	0.879	2.02162
6	0.656	255	255	255	87.426	3.256	1.779	167.313	100	21675	987	32	147.095	1.116	1.59409
53	0.44	255	255	255	65.249	19.492	1.779	112.198	100	14535	737	214	122.905	0.4	4.4475
286	0.425	255	255	255	18.712	68.379	1.779	108.261	100	14025	208	787	57.095	0.469	3.79318
11	0.625	255	255	255	15.145	6.194	1.803	159.439	100	20655	164	64	133.025	0.808	2.23144
69	0.826	255	255	255	89.564	22.863	1.809	210.618	100	27285	1014	269	60.945	0.938	1.92857
41	0.602	255	255	255	42.5	16.343	1.811	153.534	100	19890	473	193	14.036	1.01	1.79307
5	0.834	255	255	255	82.495	3.365	1.828	212.586	100	27540	933	45	35.218	1.21	1.51074
49	0.448	255	255	255	46.286	18.814	1.835	114.167	100	14790	523	224	73.301	0.501	3.66267
156	0.741	255	255	255	38.391	40.075	1.835	188.965	100	24480	427	455	163.301	0.966	1.89959
256	0.471	255	255	255	5.38	61.895	1.835	120.072	100	15555	52	701	163.301	0.446	4.11435
139	0.463	255	255	255	38.856	37.93	1.847	118.103	100	15300	432	437	25.346	0.5	3.694
120	0.988	255	255	255	58.85	35.738	1.853	251.954	100	32640	670	395	95.44	1.182	1.56768
203	0.656	255	255	255	1.273	48.517	1.862	167.313	100	21675	4	557	19.29	0.709	2.62623
259	0.811	255	255	255	29.74	62.394	1.862	206.681	100	26775	329	707	160.71	0.629	2.96025
10	0.363	255	255	255	2.539	5.553	1.864	92.514	100	11985	28	53	98.13	0.411	4.53528
219	0.394	255	255	255	32.876	52.825	1.864	100.388	100	13005	372	590	98.13	0.439	4.24601
265	1.127	255	255	255	11.506	64.428	1.864	287.385	100	37230	121	732	171.87	1.275	1.46196
21	0.672	255	255	255	9.819	9.651	1.88	171.25	100	22185	105	101	127.405	0.497	3.7827
173	0.401	255	255	255	53.54	44.191	1.88	102.356	100	13260	602	495	127.405	0.449	4.18708
223	0.88	255	255	255	89.19	53.119	1.886	224.396	100	29070	1005	600	152.241	0.981	1.92253
124	1.227	255	255	255	73.282	36.113	1.893	312.974	100	40545	830	420	68.199	1.167	1.62211
169	0.44	255	255	255	71.98	43.358	1.927	112.198	100	14535	810	499	43.152	0.658	2.92857
271	0.347	255	255	255	89.713	65.76	1.927	88.577	100	11475	1015	740	114.228	0.524	3.67748
70	1.281	255	255	255	49.135	23.594	1.929	326.753	100	42330	555	278	59.931	0.971	1.98661
86	0.841	255	255	255	61.037	29.139	1.935	214.554	100	27795	688	323	129.472	0.612	3.16176
115	0.633	255	255	255	4.965	34.777	1.945	161.408	100	20910	54	407	71.565	0.736	2.64266
159	0.803	255	255	255	26.586	41.396	1.945	204.712	100	26520	301	461	108.435	0.773	2.51617
52	0.749	255	255	255	9.035	19.324	1.965	190.934	100	24735	101	231	79.695	0.527	3.72865
211	0.71	255	255	255	38.613	50.553	1.965	181.092	100	23460	437	586	79.695	0.533	3.68668
245	0.865	255	255	255	9.335	60.233	1.974	220.46	100	28560	100	693	57.724	0.784	2.51786
31	0.988	255	255	255	56.381	13.584	2.003	251.954	100	32640	640	164	74.745	0.934	2.14454
43	0.726	255	255	255	38.23	16.943	2.005	185.029	100	23970	426	186	151.189	0.799	2.50939
231	0.71	255	255	255	70.142	56.123	2.028	181.092	100	23460	798	650	85.03	0.527	3.8482
261	0.286	255	255	255	3.979	63.024	2.044	72.83	100	9435	34	723	25.463	0.428	4.7757
272	0.394	255	255	255	8.742	66.078	2.044	100.388	100	13005	93	762	64.537	0.473	4.32135
94	0.795	255	255	255	78.87	31.646	2.068	202.744	100	26265	896	349	102.265	0.615	3.3626
305	1.451	255	255	255	89.517	74.629	2.068	370.057	100	47940	1015	860	77.735	0.879	2.35267
212	1.119	255	255	255	55.332	50.678	2.083	285.416	100	36975	625	564	117.646	1.142	1.82399
54	0.726	255	255	255	85.905	19.875	2.088	185.029	100	23970	979	214	104.621	1.055	1.97915
112	0.61	255	255	255	61.337	34.063	2.088	155.503	100	20145	688	391	22.249	0.56	3.72857
60	0.926	255	255	255	0.731	21.632	2.138	236.207	100	30600	6	235	99.462	0.791	2.70291
239	0.826	255	255	255	86.251	58.304	2.145	210.618	100	27285	974	670	34.992	0.897	2.3913
118	0.726	255	255	255	52.344	35.33	2.154	185.029	100	23970	593	416	78.232	0.908	2.37225
246	1.343	255	255	255	19.907	60.351	2.161	342.5	100	44370	218	680	153.435	1.767	1.22298
251	0.71	255	255	255	44.392	61.287	2.17	181.092	100	23460	500	710	68.629	0.577	3.76083
47	1.258	255	255	255	52.611	18.296	2.182	320.847	100	41565	591	198	130.101	0.931	2.34372
153	1.389	255	255	255	78.956	40.359	2.196	354.31	100	45900	887	467	53.13	1.77	1.24068
95	0.965	255	255	255	36.678	31.575	2.217	246.049	100	31875	412	371	56.31	0.829	2.67431
204	0.764	255	255	255	8.07	48.375	2.224	194.87	100	25245	78	548	170.91	0.527	4.22011
315	1.22	213.038	0	255	6.697	78.095	2.24	259.827	83.544	33660	69	879	131.82	1.422	1.57525
281	0.672	255	255	255	1.983	68.047	2.25	171.25	100	22185	12	781	38.66	0.823	2.7339
238	1.196	255	255	255	28.916	58.632	2.252	305.1	100	39525	324	678	69.444	1.189	1.89403
147	0.926	255	255	255	40.667	39.034	2.279	236.207	100	30600	452	436	152.447	0.784	2.90689
183	0.78	255	255	255	24.183	45.413	2.279	198.807	100	25755	269	530	62.447	0.606	3.76073
179	1.999	250.077	0	255	70.863	44.917	2.306	499.971	98.069	64770	796	504	139.635	1.755	1.31396
332	1.351	255	255	255	71.495	88.154	2.366	344.468	100	44625	802	1008	15.068	1.293	1.82985
240	1.683	255	255	255	82.378	58.959	2.379	429.109	100	55590	940	658	94.236	1.221	1.9484
16	1.034	255	255	255	49.763	8.482	2.4	263.764	100	34170	561	83	113.749	0.953	2.51836
122	0.942	255	255	255	68.388	36.058	2.413	240.143	100	31110	775	424	79.509	1.18	2.04492
92	1.127	255	255	255	71.746	31.373	2.417	287.385	100	37230	811	343	109.093	0.975	2.47897
28	1.158	255	255	255	20.551	11.38	2.43	295.258	100	38250	221	130	12.529	0.938	2.59062
320	0.849	255	255	255	0.91	83.779	2.443	216.523	100	28050	0	962	37.694	0.562	4.34698
160	1.258	255	255	255	40.958	41.399	2.447	320.847	100	41565	452	472	158.962	1.542	1.5869
187	1.683	255	255	255	86.666	45.964	2.462	429.109	100	55590	974	530	34.824	1.646	1.49575
197	1.544	255	255	255	59.667	46.932	2.474	393.678	100	51000	667	539	16.504	0.948	2.6097
152	1.559	255	255	255	75.688	40.043	2.487	397.615	100	51510	850	443	122.005	1.565	1.58914
323	1.065	255	255	255	83.6	85.236	2.513	271.638	100	35190	941	979	53.531	0.902	2.78603
102	1.112	255	255	255	45.255	33.34	2.516	283.448	100	36720	502	371	155.225	0.9	2.79556
277	1.15	255	255	255	11.821	67.349	2.517	293.29	100	37995	125	779	60.751	0.894	2.81544
84	0.648	255	255	255	74.967	28.052	2.554	165.345	100	21420	843	307	130.815	0.695	3.67482
134	1.173	255	255	255	57.574	38.048	2.562	299.195	100	38760	649	446	59.036	0.697	3.67575
14	0.895	255	255	255	3.815	7.726	2.584	228.333	100	29580	40	74	107.819	0.55	4.69818
236	1.374	255	255	255	83.844	57.7	2.584	350.373	100	45390	951	673	72.181	1.008	2.56349
234	1.938	255	255	255	72.919	57.342	2.637	494.066	100	64005	822	641	119.982	1.572	1.67748
285	0.888	255	255	255	34.05	68.794	2.668	226.365	100	29325	382	769	107.241	0.549	4.85974
275	0.841	255	255	255	0.777	66.845	2.688	214.554	100	27795	6	776	78.69	0.753	3.56972
317	1.883	255	255	255	23.506	81.371	2.714	480.287	100	62220	250	929	29.055	2.201	1.23308
45	1.15	255	255	255	87.951	17.87	2.728	293.29	100	37995	999	188	104.931	1.129	2.4163
165	0.818	255	255	255	19.288	42.357	2.757	208.649	100	27030	207	474	149.349	0.7	3.93857
333	2.686	255	255	255	88.555	89.064	2.803	684.999	100	88740	1000	1024	57.804	2.114	1.32592
266	2.563	251.928	0	255	23.739	65.243	2.833	645.632	98.795	83640	268	758	82.875	1.757	1.61241
98	2.594	255	255	255	27.159	32.918	2.862	661.379	100	85680	301	389	72.121	1.549	1.84764
111	2.37	255	255	255	71.342	34.726	2.91	604.295	100	78285	794	392	151.113	1.854	1.56958
65	1.49	255	255	255	36.732	23.28	2.925	379.899	100	49215	405	273	57.265	1.311	2.23112
297	1.837	255	255	255	88.902	70.751	2.952	468.477	100	60690	998	793	126.529	1.609	1.83468
229	1.86	248.651	0	255	87.071	55.448	2.973	462.571	97.51	59925	984	615	124.16	1.471	2.02107
121	0.98	255	255	255	37.331	35.5	3.026	249.985	100	32385	411	412	25.821	0.648	4.66975
310	1.389	255	255	255	60.335	76.783	3.033	354.31	100	45900	685	891	79.992	1.024	2.96191
260	1.961	255	255	255	83.954	63.79	3.116	499.971	100	64770	948	742	68.499	1.883	1.65481
144	1.474	255	255	255	86.704	39.246	3.12	375.962	100	48705	984	430	99.728	0.844	3.69668
296	1.266	255	255	255	6.438	71.049	3.207	322.816	100	41820	71	793	99.462	0.984	3.25915
301	1.528	253.712	0	255	34.996	73.571	3.251	387.773	99.495	50235	394	817	108.925	0.799	4.06884
93	2.787	244.404	0	255	5.432	31.907	3.265	681.063	95.845	88230	54	346	113.806	1.861	1.75443
119	1.428	255	255	255	26.561	36.265	3.283	364.152	100	47175	302	394	105.524	0.98	3.35
293	1.413	255	255	255	11.948	70.695	3.307	360.215	100	46665	132	786	106.991	0.682	4.84897
300	2.709	255	255	255	15.894	71.329	3.34	690.904	100	89505	173	829	54.638	2.004	1.66667
167	1.768	255	255	255	47.526	43.834	3.343	450.761	100	58395	544	479	93.013	1.269	2.63436
39	1.76	255	255	255	86.81	16.127	3.357	448.793	100	58140	977	205	47.121	2.125	1.57976
50	1.243	255	255	255	42.494	20.101	3.381	316.911	100	41055	469	242	65.433	1.514	2.23316
55	0.872	255	255	255	87.31	20.919	3.412	222.428	100	28815	991	256	78.111	0.644	5.29814
99	1.636	255	255	255	61.383	32.467	3.422	417.298	100	54060	685	384	41.878	1.426	2.39972
13	1.791	253.901	0	255	23.806	7.29	3.444	454.698	99.569	58905	257	71	142.253	1.189	2.89655
186	2.802	255	255	255	3.323	46.766	3.514	714.525	100	92565	29	549	53.13	1.83	1.92022
150	2.354	255	255	255	25.572	40.113	3.558	600.359	100	77775	280	474	69.775	1.481	2.40243
83	2.702	255	255	255	29.488	28.368	3.612	688.936	100	89250	329	340	71.565	1.202	3.00499
217	2.161	255	255	255	10.067	52.323	3.658	551.149	100	71400	96	605	24.102	1.199	3.05088
140	1.799	255	255	255	42.293	39.016	3.695	458.635	100	59415	473	427	108.004	1.531	2.41346
145	1.961	239.941	0	255	1.505	38.851	3.708	470.445	94.094	60945	0	460	36.327	1.429	2.59482
2	3.35	255	255	255	84.587	1.173	3.738	854.281	100	110670	944	0	119.578	2.426	1.54081
110	3.312	244.895	0	255	28.816	35.45	3.793	810.976	96.037	105060	326	380	103.392	2.19	1.73196
136	2.269	245.459	0	255	28.597	38.767	3.794	557.054	96.259	72165	328	465	84.685	1.402	2.70613
148	1.883	255	255	255	50.302	39.849	3.794	480.287	100	62220	558	467	47.816	1.047	3.62369
24	2.37	255	255	255	56.727	10.721	4.011	604.295	100	78285	635	143	61.189	1.458	2.75103
130	2.462	255	255	255	77.429	38.25	4.062	627.916	100	81345	878	457	68.429	1.744	2.32913
198	3.914	216.775	0	255	49.084	48.601	4.07	848.376	85.01	109905	557	576	76.264	2.006	2.02891
324	1.173	255	255	255	54.075	86.521	4.07	299.195	100	38760	610	1005	76.264	0.855	4.76023
171	3.682	255	255	255	88.373	44.403	4.118	938.921	100	121635	985	499	146.31	2.861	1.43936
182	3.512	255	255	255	16.413	46.076	4.244	895.617	100	116025	170	511	152.904	3.402	1.2475
278	3.227	255	255	255	79.519	67.983	4.244	822.787	100	106590	889	754	117.096	1.592	2.66583
327	3.62	239.232	0	255	83.705	88.472	4.25	866.091	93.817	112200	939	1024	60.255	2.705	1.57116
170	2.794	255	255	255	19.878	43.943	4.327	712.557	100	92310	208	513	29.168	2.238	1.93342
96	3.381	255	255	255	81.318	32.475	4.391	862.154	100	111690	904	359	160.115	2.941	1.49303
74	1.992	255	255	255	72.229	26.869	4.407	507.844	100	65790	814	278	113.499	1.154	3.81889
105	2.949	255	255	255	82.291	33.968	4.489	751.925	100	97410	921	406	40.236	2.136	2.10159
22	2.694	255	255	255	51.845	10.5	4.637	686.968	100	88995	576	148	62.949	1.973	2.35023
4	2.632	255	255	255	89.075	4.468	4.998	671.221	100	86955	1005	82	79.875	1.206	4.14428
312	5.504	244.271	0	255	31.795	78.131	5.263	1344.41	95.792	174165	349	864	104.5	3.4	1.54794
142	4.716	255	255	255	22.453	40.021	5.29	1202.69	100	155805	223	470	41.634	2.963	1.78535
270	4.508	255	255	255	16.557	66.924	5.49	1149.54	100	148920	169	789	50.194	2.992	1.83489
88	6.168	251.17	0	255	76.49	31.14	5.56	1549.12	98.498	200685	854	383	58.57	3.109	1.78836
138	4.547	241.579	0	255	70.733	40.615	5.584	1098.36	94.737	142290	801	426	102.724	2.557	2.18381
139	0.208	255	255	255	28.914	29.412	0.589	53.146	100	6885	327	332	116.565	0.527	1.11765
145	0.201	255	255	255	59.524	31.717	0.589	51.178	100	6630	676	358	116.565	0.439	1.34169
22	0.247	255	255	255	71.836	8.555	0.64	62.988	100	8160	817	94	105.945	0.559	1.1449
25	0.255	255	255	255	75.259	9.296	0.669	64.957	100	8415	853	107	23.199	0.527	1.26945
40	0.27	255	255	255	28.252	13.213	0.669	68.894	100	8925	318	149	156.801	0.615	1.0878
212	0.232	255	255	255	22.073	59.056	0.669	59.052	100	7650	248	670	156.801	0.511	1.3092
111	0.201	255	255	255	50.593	25.003	0.686	51.178	100	6630	573	282	140.194	0.471	1.45648
315	0.232	255	255	255	71.025	79.802	0.686	59.052	100	7650	805	906	129.806	0.559	1.22719
52	0.286	255	255	255	66.292	15.471	0.708	72.83	100	9435	752	173	119.745	0.615	1.15122
72	0.293	255	255	255	66.368	18.249	0.708	74.799	100	9690	752	210	29.745	0.615	1.15122
88	0.232	255	255	255	42.392	21.35	0.708	59.052	100	7650	482	239	97.125	0.439	1.61276
89	0.286	255	255	255	81.088	21.574	0.708	72.83	100	9435	921	242	119.745	0.527	1.34345
91	0.208	255	255	255	74.792	21.563	0.708	53.146	100	6885	848	243	150.255	0.439	1.61276
161	0.232	255	255	255	45.083	37.536	0.708	59.052	100	7650	511	431	60.255	0.527	1.34345
270	0.216	255	255	255	58.363	68.254	0.708	55.115	100	7140	662	774	119.745	0.527	1.34345
299	0.247	255	255	255	77.681	74.545	0.708	62.988	100	8160	882	852	60.255	0.527	1.34345
97	0.286	255	255	255	23.98	22.925	0.725	72.83	100	9435	272	257	104.036	0.527	1.37571
304	0.286	255	255	255	65.05	75.467	0.725	72.83	100	9435	739	855	104.036	0.615	1.17886
313	0.208	255	255	255	73.051	78.964	0.725	53.146	100	6885	830	895	104.036	0.439	1.65148
93	0.239	255	255	255	44.495	22.4	0.751	61.02	100	7905	505	251	110.556	0.439	1.71071
137	0.286	255	255	255	14.139	29.55	0.751	72.83	100	9435	160	332	110.556	0.527	1.42505
168	0.316	255	255	255	43.176	40.626	0.751	80.704	100	10455	489	459	110.556	0.615	1.22114
241	0.34	255	255	255	18.187	64.181	0.751	86.609	100	11220	203	729	159.444	0.615	1.22114
287	0.247	255	255	255	23.719	72.343	0.751	62.988	100	8160	266	825	20.556	0.439	1.71071
31	0.201	255	255	255	44.511	10.918	0.756	51.178	100	6630	504	121	125.538	0.435	1.73793
126	0.224	255	255	255	26.323	27.668	0.756	57.083	100	7395	296	317	35.538	0.435	1.73793
193	0.255	255	255	255	57.682	50.044	0.756	64.957	100	8415	653	572	35.538	0.497	1.52113
198	0.255	255	255	255	48.742	51.803	0.756	64.957	100	8415	552	586	125.538	0.55	1.37455
252	0.216	255	255	255	59.239	65.336	0.756	55.115	100	7140	670	742	144.462	0.527	1.43454
271	0.208	255	255	255	14.326	68.444	0.756	53.146	100	6885	161	783	54.462	0.439	1.7221
289	0.262	255	255	255	79.037	72.589	0.756	66.925	100	8670	896	829	35.538	0.497	1.52113
310	0.216	255	255	255	81.254	76.732	0.756	55.115	100	7140	921	875	35.538	0.445	1.69888
37	0.355	255	255	255	27.425	12.3	0.786	90.546	100	11730	310	136	116.565	0.615	1.27805
146	0.216	255	255	255	57.017	32.768	0.786	55.115	100	7140	647	369	116.565	0.457	1.71991
324	0.239	255	255	255	33.456	87.429	0.786	61.02	100	7905	377	997	26.565	0.439	1.79043
4	0.301	255	255	255	14.128	1.058	0.81	76.767	100	9945	160	8	102.529	0.615	1.31707
92	0.262	255	255	255	33.069	22.125	0.81	66.925	100	8670	373	255	40.601	0.55	1.47273
114	0.324	255	255	255	75.95	25.331	0.81	82.672	100	10710	861	285	139.399	0.615	1.31707
143	0.201	255	255	255	49.576	30.382	0.81	51.178	100	6630	562	343	130.601	0.527	1.537
251	0.347	255	255	255	58.203	65.393	0.81	88.577	100	11475	660	748	49.399	0.615	1.31707
274	0.247	255	255	255	59.34	68.782	0.81	62.988	100	8160	672	786	40.601	0.497	1.62978
282	0.208	255	255	255	82.683	71.063	0.81	53.146	100	6885	937	809	12.529	0.439	1.8451
28	0.232	255	255	255	75.963	9.928	0.829	59.052	100	7650	863	109	122.005	0.497	1.66801
110	0.232	255	255	255	8.402	24.803	0.829	59.052	100	7650	92	280	147.995	0.471	1.76008
123	0.224	255	255	255	23.102	27.159	0.829	57.083	100	7395	259	311	32.005	0.445	1.86292
165	0.239	255	255	255	62.809	38.804	0.829	61.02	100	7905	712	438	122.005	0.497	1.66801
204	0.355	255	255	255	20.332	56.921	0.829	90.546	100	11730	229	652	57.995	0.615	1.34797
303	0.371	255	255	255	78.394	75.368	0.829	94.483	100	12240	888	860	32.005	0.672	1.23363
26	0.425	255	255	255	74.43	9.539	0.834	108.261	100	14025	846	104	108.435	0.703	1.18634
94	0.239	255	255	255	20.66	22.459	0.834	61.02	100	7905	233	252	108.435	0.511	1.63209
107	0.401	255	255	255	74.369	24.263	0.834	102.356	100	13260	844	272	108.435	0.615	1.3561
36	0.471	255	255	255	74.734	12.274	0.879	120.072	100	15555	848	144	53.13	0.786	1.11832
150	0.347	255	255	255	47.822	34.227	0.879	88.577	100	11475	540	392	36.87	0.609	1.44335
190	0.216	255	255	255	67.46	48.887	0.879	55.115	100	7140	764	553	143.13	0.39	2.25385
253	0.409	255	255	255	32.149	65.674	0.879	104.325	100	13515	364	743	126.87	0.703	1.25036
314	0.262	255	255	255	5.468	79.499	0.879	66.925	100	8670	59	908	36.87	0.527	1.66793
320	0.316	236.341	0	255	1.608	85.816	0.879	74.799	92.683	9690	14	980	53.13	0.703	1.25036
237	0.224	255	255	255	67.968	63.448	0.883	57.083	100	7395	769	722	174.289	0.469	1.88273
11	0.224	255	255	255	62.663	5.282	0.896	57.083	100	7395	712	65	78.69	0.351	2.55271
108	0.463	255	255	255	22.895	24.538	0.905	118.103	100	15300	256	282	29.055	0.703	1.28734
118	0.363	255	255	255	12.798	26.331	0.905	92.514	100	11985	143	304	60.945	0.583	1.55232
291	0.34	255	255	255	59.061	72.873	0.905	86.609	100	11220	669	834	60.945	0.703	1.28734
71	0.309	255	255	255	60.794	18.371	0.917	78.736	100	10200	690	204	106.699	0.615	1.49106
119	0.44	255	255	255	45.895	26.505	0.917	112.198	100	14535	522	307	73.301	0.703	1.30441
258	0.394	255	255	255	57.898	66.346	0.917	100.388	100	13005	657	760	73.301	0.615	1.49106
54	0.247	255	255	255	29.295	16.048	0.934	62.988	100	8160	330	179	131.186	0.435	2.14713
295	0.347	255	255	255	52.898	73.777	0.934	88.577	100	11475	599	844	41.186	0.589	1.58574
24	0.386	249.9	0	255	72.687	9.19	0.946	96.451	98	12495	822	103	158.199	0.615	1.53821
142	0.324	255	255	255	13.453	30.638	0.946	82.672	100	10710	151	343	111.801	0.527	1.79507
175	0.378	255	255	255	62.589	43.654	0.946	96.451	100	12495	710	502	68.199	0.611	1.54828
176	0.239	255	255	255	71.071	44.09	0.946	61.02	100	7905	804	500	158.199	0.351	2.69516
194	0.425	255	255	255	59.111	50.623	0.946	108.261	100	14025	668	578	21.801	0.615	1.53821
308	0.208	255	255	255	16.535	76.621	0.946	53.146	100	6885	186	868	111.801	0.404	2.34158
75	0.239	255	255	255	26.217	19.308	0.95	61.02	100	7905	294	217	146.31	0.393	2.4173
191	0.278	255	255	255	51.139	49.169	0.95	70.862	100	9180	580	564	56.31	0.538	1.7658
215	0.386	255	255	255	64.162	59.793	0.95	98.419	100	12750	726	677	146.31	0.615	1.54472
227	0.355	255	255	255	65.995	61.898	0.95	90.546	100	11730	748	709	56.31	0.597	1.59129
332	0.355	255	255	255	48.315	89.681	0.95	90.546	100	11730	545	1024	33.69	0.615	1.54472
45	0.224	255	255	255	73.912	14.359	0.982	57.083	100	7395	840	158	100.305	0.351	2.79772
147	0.401	255	255	255	51.108	32.964	0.982	102.356	100	13260	579	370	116.565	0.703	1.39687
201	0.247	255	255	255	14.689	54.181	0.982	62.988	100	8160	166	622	79.695	0.351	2.79772
296	0.332	255	255	255	23.038	73.829	0.982	84.641	100	10965	257	843	26.565	0.527	1.86338
316	0.332	255	255	255	70.548	80.874	0.982	84.641	100	10965	797	919	169.695	0.578	1.69896
61	0.363	255	255	255	45.216	17.038	1.002	92.514	100	11985	511	190	127.875	0.575	1.74261
87	0.247	255	255	255	8.234	21.27	1.002	62.988	100	8160	92	248	74.745	0.351	2.8547
103	0.316	255	255	255	52.311	23.363	1.002	80.704	100	10455	591	262	142.125	0.435	2.30345
127	0.208	255	255	255	12.839	28.058	1.002	53.146	100	6885	145	313	105.255	0.439	2.28246
220	0.409	255	255	255	15.529	60.932	1.002	104.325	100	13515	173	698	52.125	0.629	1.593
49	0.208	255	255	255	22.23	15.26	1.025	53.146	100	6885	250	179	59.036	0.333	3.07808
263	0.278	255	255	255	14.765	67.105	1.025	70.862	100	9180	163	767	30.964	0.439	2.33485
63	0.602	255	255	255	6.006	17.198	1.028	153.534	100	19890	63	198	19.983	0.87	1.18161
125	0.316	255	255	255	7.617	27.456	1.028	80.704	100	10455	81	314	19.983	0.439	2.34169
154	0.216	255	255	255	45.994	34.952	1.028	55.115	100	7140	522	403	70.017	0.39	2.6359
223	0.44	255	255	255	61.457	61.497	1.028	112.198	100	14535	696	695	109.983	0.77	1.33506
273	0.239	255	255	255	56.146	68.866	1.058	61.02	100	7905	635	787	41.634	0.435	2.43218
156	0.394	255	255	255	58.468	36.25	1.062	100.388	100	13005	660	410	155.556	0.571	1.85989
186	0.618	255	255	255	55.537	47.929	1.062	157.471	100	20400	626	544	155.556	0.879	1.20819
7	0.409	255	255	255	78.818	2.6	1.069	104.325	100	13515	897	24	99.462	0.703	1.52063
196	0.432	255	255	255	52.977	51.407	1.069	110.23	100	14280	597	583	170.538	0.615	1.73821
120	0.232	255	255	255	7.942	26.689	1.072	59.052	100	7650	87	308	55.008	0.432	2.48148
256	0.417	255	255	255	80.451	65.8	1.072	106.293	100	13770	912	744	124.992	0.559	1.91771
268	0.486	255	255	255	4.834	67.762	1.072	124.008	100	16065	50	768	145.008	0.756	1.41799
326	0.509	255	255	255	23.934	88.097	1.072	129.914	100	16830	267	999	145.008	0.703	1.52489
16	0.324	255	255	255	72.379	7.144	1.087	82.672	100	10710	817	83	14.036	0.439	2.47608
250	0.425	255	255	255	57.36	65.644	1.087	108.261	100	14025	651	752	75.964	0.615	1.76748
151	0.216	255	255	255	60.645	34.24	1.101	55.115	100	7140	685	392	28.61	0.354	3.11017
247	0.494	255	255	255	39.527	65.264	1.101	125.977	100	16320	444	745	28.61	0.636	1.73113
55	0.448	255	255	255	21.024	16.449	1.111	114.167	100	14790	238	193	71.565	0.527	2.10816
69	0.479	255	255	255	26.766	18.124	1.111	122.04	100	15810	303	212	71.565	0.615	1.8065
185	0.448	255	255	255	69.399	47.707	1.111	114.167	100	14790	784	541	161.565	0.527	2.10816
197	0.27	255	255	255	45.349	51.612	1.111	68.894	100	8925	510	586	161.565	0.439	2.53075
244	0.332	255	255	255	62.497	64.663	1.125	84.641	100	10965	707	732	141.34	0.784	1.43495
100	0.695	255	255	255	74.344	23.177	1.142	177.155	100	22950	844	270	67.38	0.879	1.2992
83	0.479	242.661	0	255	9.623	21.242	1.172	116.135	95.161	15045	109	248	77.005	0.767	1.52803
153	0.394	255	255	255	54.26	34.585	1.172	100.388	100	13005	611	395	12.995	0.439	2.6697
155	0.27	255	255	255	62.381	35.248	1.172	68.894	100	8925	704	399	167.005	0.351	3.33903
297	0.502	255	255	255	55.006	73.935	1.172	127.945	100	16575	620	843	12.995	0.615	1.90569
319	0.247	255	255	255	29.23	85.489	1.172	62.988	100	8160	332	981	77.005	0.517	2.26692
321	0.208	255	255	255	3.278	86.975	1.172	53.146	100	6885	36	983	102.995	0.264	4.43939
60	0.371	255	255	255	30.183	17.149	1.179	94.483	100	12240	340	189	116.565	0.5	2.358
39	0.309	255	255	255	79.176	13.1	1.182	78.736	100	10200	897	145	131.987	0.559	2.11449
174	0.378	255	255	255	69.393	42.951	1.182	96.451	100	12495	785	484	138.013	0.497	2.37827
6	0.247	255	255	255	62.627	2.463	1.195	62.988	100	8160	711	34	72.897	0.31	3.85484
205	0.34	255	255	255	62.665	56.956	1.195	86.609	100	11220	707	647	162.897	0.445	2.68539
301	0.517	255	255	255	75.332	75.208	1.195	131.882	100	17085	853	861	53.973	0.668	1.78892
66	0.432	255	255	255	28.065	17.468	1.221	110.23	100	14280	316	193	120.256	0.559	2.18426
172	0.517	255	255	255	40.22	42.431	1.221	131.882	100	17085	452	480	149.744	0.682	1.79032
228	0.224	255	255	255	66.508	62.142	1.221	57.083	100	7395	753	713	59.744	0.377	3.23873
27	0.409	255	255	255	32.005	9.821	1.224	104.325	100	13515	358	109	158.962	0.703	1.74111
290	0.718	255	255	255	77.579	72.876	1.224	183.06	100	23715	877	833	21.038	0.889	1.37683
134	0.247	255	255	255	23.95	29.532	1.243	62.988	100	8160	271	329	98.13	0.387	3.21189
157	0.278	255	255	255	48.713	36.142	1.243	70.862	100	9180	547	410	171.87	0.264	4.70833
317	0.255	255	255	255	10.574	82.272	1.249	64.957	100	8415	115	941	39.289	0.354	3.52825
34	0.355	255	255	255	67.038	11.636	1.258	90.546	100	11730	758	135	24.775	0.568	2.21479
42	0.525	255	255	255	59.017	13.937	1.258	133.85	100	17340	671	150	114.775	1.033	1.21781
206	0.363	255	255	255	70.753	57.074	1.258	92.514	100	11985	799	648	167.905	0.527	2.3871
262	0.618	255	255	255	55.109	67.278	1.258	157.471	100	20400	625	759	102.095	0.751	1.6751
269	0.386	255	255	255	35.766	67.939	1.258	98.419	100	12750	401	776	24.775	0.55	2.28727
182	0.579	255	255	255	62.65	46.759	1.267	147.629	100	19125	708	537	33.69	0.746	1.69839
208	0.355	255	255	255	34.261	57.813	1.267	90.546	100	11730	383	664	33.69	0.653	1.94028
329	0.71	255	255	255	22.048	88.929	1.267	181.092	100	23460	246	1016	33.69	0.966	1.31159
53	0.27	255	255	255	41.629	16.275	1.279	68.894	100	8925	472	192	74.055	0.432	2.96065
15	0.509	255	255	255	71.006	7.263	1.297	129.914	100	16830	805	76	118.301	0.629	2.062
180	0.517	255	255	255	65.288	45.939	1.297	131.882	100	17085	737	520	151.699	0.75	1.72933
47	0.27	255	255	255	27.127	15.126	1.306	68.894	100	8925	308	178	70.346	0.49	2.66531
148	0.34	255	255	255	53.5	33.68	1.306	86.609	100	11220	603	388	42.274	0.412	3.1699
243	0.625	255	255	255	12.178	64.655	1.306	159.439	100	20655	136	743	70.346	0.703	1.85775
323	0.255	255	255	255	32.56	87.439	1.306	64.957	100	8415	365	1001	42.274	0.372	3.51075
160	0.448	255	255	255	66	37.149	1.318	114.167	100	14790	746	416	126.87	0.731	1.80301
117	0.594	255	255	255	54.464	26.447	1.33	151.566	100	19635	619	294	97.595	0.703	1.89189
80	0.903	255	255	255	19.914	20.836	1.338	230.301	100	29835	223	244	66.801	0.943	1.41888
233	0.417	255	255	255	37.27	62.793	1.338	106.293	100	13770	418	717	23.199	0.533	2.51032
56	0.533	255	255	255	31.273	16.872	1.344	135.819	100	17595	354	184	101.31	0.615	2.18537
159	0.463	255	255	255	64.875	37.191	1.344	118.103	100	15300	736	416	101.31	0.524	2.56489
213	0.494	255	255	255	62.564	59.103	1.344	125.977	100	16320	706	674	11.31	0.703	1.91181
288	0.332	255	255	255	38.91	72.519	1.344	84.641	100	10965	435	824	168.69	0.479	2.80585
112	0.286	255	255	255	21.109	25.423	1.364	72.83	100	9435	238	297	75.069	0.345	3.95362
192	0.448	255	255	255	56.024	49.866	1.364	114.167	100	14790	629	569	14.931	0.527	2.58824
280	0.525	255	255	255	88.023	70.402	1.364	133.85	100	17340	994	799	165.069	0.439	3.10706
177	0.54	255	255	255	68.722	44.462	1.372	137.787	100	17850	780	514	39.806	1.019	1.34642
236	0.78	255	255	255	59.212	63.548	1.372	198.807	100	25755	669	718	129.806	0.972	1.41152
264	0.34	255	255	255	33.63	67.541	1.375	86.609	100	11220	379	762	116.565	0.422	3.25829
327	0.479	255	255	255	28.5	88.074	1.375	122.04	100	15810	318	1007	26.565	0.571	2.40806
5	1.05	255	255	255	64.065	1.73	1.389	267.701	100	34680	726	27	71.565	1.054	1.31784
170	0.409	255	255	255	64.708	41.328	1.417	104.325	100	13515	729	466	150.255	0.574	2.46864
162	0.849	255	255	255	43.655	37.888	1.419	216.523	100	28050	489	428	158.199	0.959	1.47967
311	0.78	255	255	255	24.636	76.916	1.419	198.807	100	25755	273	878	21.801	0.791	1.79393
58	0.749	255	255	255	73.925	16.947	1.43	190.934	100	24735	835	187	132.51	0.808	1.7698
95	0.448	255	255	255	48.656	22.928	1.43	114.167	100	14790	550	269	79.38	0.664	2.15361
98	0.818	255	255	255	41.815	23.281	1.43	208.649	100	27030	476	273	79.38	1.006	1.42147
133	0.54	255	255	255	57.583	29.516	1.43	137.787	100	17850	654	344	79.38	0.439	3.2574
183	0.718	255	255	255	66.196	47.43	1.43	183.06	100	23715	746	538	169.38	0.615	2.3252
279	0.594	251.688	0	255	10.412	70.387	1.43	149.598	98.701	19380	110	800	169.38	0.586	2.44027
225	0.34	255	255	255	63.494	61.915	1.449	86.609	100	11220	721	713	75.964	0.41	3.53415
101	0.417	255	255	255	14.345	23.086	1.473	106.293	100	13770	156	265	17.354	0.458	3.21616
257	0.741	255	255	255	13.859	65.892	1.473	188.965	100	24480	149	748	162.646	0.703	2.09531
144	0.455	255	255	255	26.23	30.879	1.491	116.135	100	15045	293	346	135	0.634	2.35174
181	0.363	255	255	255	66.82	46.048	1.491	92.514	100	11985	754	519	135	0.435	3.42759
216	0.44	255	255	255	65.089	60.13	1.494	112.198	100	14535	734	688	28.072	0.473	3.15856
226	0.594	255	255	255	58.64	62.214	1.496	151.566	100	19635	663	713	49.764	0.94	1.59149
307	0.71	255	255	255	19.843	76.81	1.496	181.092	100	23460	219	867	130.236	0.968	1.54545
331	0.347	255	255	255	33.114	89.43	1.501	88.577	100	11475	369	1021	20.556	0.455	3.2989
20	0.826	255	255	255	69.24	8.303	1.517	210.618	100	27285	780	92	169.992	0.879	1.72582
158	0.78	255	255	255	44.01	36.701	1.517	198.807	100	25755	493	416	169.992	0.774	1.95995
57	0.432	255	255	255	61.788	17.184	1.534	110.23	100	14280	699	203	76.759	0.791	1.93932
217	0.309	255	255	255	21.78	60.117	1.534	78.736	100	10200	240	682	166.759	0.362	4.23757
261	0.957	252.944	0	255	12.097	67.293	1.534	242.112	99.194	31365	129	764	156.371	1.193	1.28583
312	0.455	255	255	255	13.323	78.651	1.534	116.135	100	15045	143	898	13.241	0.446	3.43946
2	0.517	255	255	255	28.176	0.525	1.537	131.882	100	17085	312	13	30.964	0.773	1.98836
238	0.378	255	255	255	9.465	63.758	1.537	96.451	100	12495	100	722	149.036	0.583	2.63636
210	0.556	255	255	255	17.844	58.352	1.554	141.724	100	18360	196	660	132.709	0.836	1.85885
248	0.494	255	255	255	78.586	65.407	1.554	125.977	100	16320	889	738	132.709	0.683	2.27526
14	0.494	255	255	255	31.48	6.793	1.564	125.977	100	16320	350	71	141.843	0.773	2.02329
33	0.633	255	255	255	7.956	11.75	1.564	161.408	100	20910	83	126	128.157	0.819	1.90965
211	0.471	255	255	255	11.373	58.62	1.564	120.072	100	15555	124	674	51.843	0.667	2.34483
105	0.425	255	255	255	71.491	23.758	1.572	108.261	100	14025	806	264	153.435	0.747	2.10442
281	0.78	255	255	255	55.696	71.314	1.572	198.807	100	25755	629	819	63.435	0.866	1.81524
13	0.309	255	255	255	79.005	6.484	1.584	78.736	100	10200	894	65	123.69	0.437	3.62471
124	0.517	255	255	255	44.675	27.567	1.584	131.882	100	17085	503	322	56.31	0.645	2.45581
128	0.525	255	255	255	17.476	28.208	1.584	133.85	100	17340	197	330	70.56	0.566	2.79859
322	0.425	255	255	255	4.736	87.569	1.584	108.261	100	14025	49	1004	56.31	0.51	3.10588
35	0.517	255	255	255	28.837	12.505	1.603	131.882	100	17085	326	132	99.462	0.615	2.6065
50	0.764	255	255	255	77.173	15.898	1.603	194.87	100	25245	878	171	99.462	0.737	2.17503
79	0.556	255	255	255	65.97	20.494	1.615	141.724	100	18360	748	224	112.38	0.528	3.05871
140	0.61	255	255	255	56.622	30.283	1.615	155.503	100	20145	641	354	67.62	0.596	2.70973
246	0.363	255	255	255	42.816	65.28	1.615	92.514	100	11985	481	749	45	0.435	3.71264
106	0.563	255	255	255	42.954	24.031	1.651	143.692	100	18615	485	265	115.201	0.613	2.69331
43	0.332	255	255	255	77.593	14.416	1.658	84.641	100	10965	878	155	122.005	0.453	3.66004
272	0.378	255	255	255	84.812	68.719	1.658	96.451	100	12495	957	787	32.005	0.414	4.00483
218	0.502	255	255	255	66.681	60.439	1.679	127.945	100	16575	751	695	42.879	0.629	2.66932
64	0.463	255	255	255	68.922	17.282	1.69	118.103	100	15300	778	193	152.103	0.629	2.6868
230	0.973	255	255	255	60.937	63.004	1.69	248.017	100	32130	687	726	62.103	1.142	1.47986
309	0.486	255	255	255	61.097	76.628	1.69	124.008	100	16065	685	872	171.027	0.501	3.37325
109	0.324	255	255	255	18.406	24.866	1.697	82.672	100	10710	205	276	111.251	0.49	3.46327
9	0.656	255	255	255	30.593	3.897	1.706	167.313	100	21675	340	48	34.509	0.932	1.83047
325	0.648	255	255	255	35.433	87.771	1.726	165.345	100	21420	392	1003	14.744	0.706	2.44476
189	0.602	255	255	255	72.787	48.857	1.733	153.534	100	19890	820	551	149.534	0.506	3.4249
249	0.455	255	255	255	81.121	65.4	1.733	116.135	100	15045	915	740	149.534	0.435	3.98391
302	0.486	255	255	255	54.454	75.473	1.74	124.008	100	16065	612	852	135	0.683	2.54758
292	0.494	255	255	255	38.58	73.391	1.751	125.977	100	16320	428	838	17.526	0.625	2.8016
115	0.417	255	255	255	11.171	25.891	1.757	106.293	100	13770	121	303	53.13	0.504	3.48611
141	0.502	255	255	255	15.484	30.159	1.768	127.945	100	16575	169	349	26.565	0.55	3.21455
199	0.664	255	255	255	68.398	53.038	1.768	169.281	100	21930	774	613	63.435	0.589	3.0017
260	1.073	255	255	255	84.746	66.61	1.792	273.606	100	35445	955	756	168.69	0.82	2.18537
300	0.44	255	255	255	51.72	74.77	1.792	112.198	100	14535	579	852	11.31	0.451	3.97339
219	0.772	255	255	255	10.625	60.768	1.809	196.839	100	25500	116	702	60.945	0.748	2.41845
12	0.517	255	255	255	76.339	6.18	1.811	131.882	100	17085	868	60	104.036	0.49	3.69592
86	0.494	255	255	255	69.992	21.075	1.811	125.977	100	16320	788	245	22.834	0.679	2.66716
179	1.227	255	255	255	71.727	46.086	1.811	312.974	100	40545	806	523	165.964	1.084	1.67066
255	1.274	253.455	0	255	55.968	66.045	1.811	322.816	99.394	41820	629	745	157.166	1.134	1.597
76	0.895	255	255	255	43.688	19.786	1.828	228.333	100	29580	493	217	125.218	0.804	2.27363
209	0.533	255	255	255	70.876	58.462	1.828	135.819	100	17595	797	669	35.218	0.792	2.30808
305	0.949	255	255	255	56.445	76.1	1.847	242.112	100	31365	633	861	154.654	0.966	1.91201
222	0.803	255	255	255	9.285	61.543	1.853	204.712	100	26520	101	712	58.57	1.121	1.65299
81	0.563	255	255	255	24.394	20.803	1.862	143.692	100	18615	266	242	19.29	0.879	2.11832
224	0.486	255	255	255	33.68	61.507	1.862	124.008	100	16065	373	703	19.29	0.436	4.27064
10	0.911	255	255	255	76.087	4.139	1.864	232.27	100	30090	866	38	98.13	0.825	2.25939
82	0.448	255	255	255	25.987	21.375	1.864	114.167	100	14790	294	232	98.13	0.45	4.14222
207	0.563	255	255	255	13.212	58.398	1.886	143.692	100	18615	145	673	62.241	0.87	2.16782
214	0.795	255	255	255	59.874	59.811	1.935	202.744	100	26265	673	688	50.528	0.994	1.94668
21	0.571	255	255	255	58.522	8.423	1.945	145.661	100	18870	654	100	18.435	0.512	3.79883
102	0.401	255	255	255	40.849	23.825	1.945	102.356	100	13260	461	261	108.435	0.426	4.56573
113	0.517	255	255	255	14.42	26.036	1.951	131.882	100	17085	156	303	54.162	0.738	2.64363
245	0.687	255	255	255	38.918	65.233	1.951	175.187	100	22695	445	732	97.765	1.014	1.92406
1	0.749	255	255	255	29.603	0.635	1.965	190.934	100	24735	326	0	153.435	1.038	1.89306
318	0.563	255	255	255	26.805	85.646	1.965	143.692	100	18615	301	986	63.435	0.665	2.95489
77	1.065	255	255	255	80.658	20.183	1.982	271.638	100	35190	917	240	77.196	1.403	1.41269
278	1.058	253.139	0	255	78.787	71.137	1.992	267.701	99.27	34680	893	797	138.576	1.491	1.33602
195	1.166	251.623	0	255	51.564	51.803	2.003	293.29	98.675	37995	583	601	74.745	1.18	1.69746
242	0.471	255	255	255	81.647	64.109	2.003	120.072	100	15555	920	734	15.255	0.595	3.36639
171	0.787	255	255	255	64.304	42.451	2.023	200.776	100	26010	723	476	145.62	0.745	2.71544
136	0.347	255	255	255	9.794	30.031	2.049	88.577	100	11475	106	352	59.036	0.367	5.58311
167	0.44	255	255	255	63.734	40.166	2.049	112.198	100	14535	716	452	149.036	0.393	5.21374
41	0.733	255	255	255	63.446	13.985	2.068	186.997	100	24225	720	148	102.265	0.516	4.00775
59	0.502	255	255	255	73.36	17.321	2.112	127.945	100	16575	829	188	135	0.559	3.77818
48	0.54	255	255	255	20.204	15.554	2.125	137.787	100	17850	229	189	82.875	0.455	4.67033
328	0.965	255	255	255	31.329	88.606	2.125	246.049	100	31875	344	1014	29.745	0.747	2.84471
46	0.988	255	255	255	62.775	15.239	2.138	251.954	100	32640	713	163	99.462	0.791	2.70291
129	0.957	255	255	255	26.068	28.83	2.138	244.08	100	31620	299	344	80.538	1.596	1.3396
293	0.895	255	255	255	25.129	73.894	2.202	228.333	100	29580	276	834	151.39	1.136	1.93838
164	0.919	255	255	255	42.031	39.616	2.212	234.238	100	30345	479	438	96.843	0.895	2.47151
259	0.548	255	255	255	38.229	67.094	2.212	139.756	100	18105	434	753	96.843	0.634	3.48896
32	0.772	255	255	255	75.841	11.729	2.223	196.839	100	25500	859	121	108.435	0.703	3.16216
149	0.625	255	255	255	48.809	34.391	2.245	159.439	100	20655	544	398	30.579	0.511	4.39335
221	1.636	255	255	255	68.001	61.884	2.306	417.298	100	54060	768	691	130.365	1.581	1.45857
96	1.467	255	255	255	21.832	23.362	2.339	373.994	100	48450	234	270	34.287	1.421	1.64602
284	0.865	255	255	255	33.419	72.021	2.357	220.46	100	28560	367	824	26.565	0.803	2.93524
231	1.297	255	255	255	77.687	63.115	2.387	330.689	100	42840	869	718	173.66	1.123	2.12556
70	0.579	255	255	255	31.303	19.148	2.43	147.629	100	19125	353	230	77.471	0.469	5.18124
163	1.212	255	255	255	65.448	39.631	2.43	309.037	100	40035	744	437	102.529	1.241	1.9581
254	0.71	255	255	255	65.027	66.647	2.43	181.092	100	23460	737	770	77.471	0.709	3.42736
23	0.764	255	255	255	79.045	9.524	2.441	194.87	100	25245	894	96	120.256	0.542	4.50369
17	0.656	255	255	255	59.626	8.445	2.53	167.313	100	21675	671	110	69.677	0.669	3.78176
229	0.749	255	255	255	80.097	62.355	2.534	190.934	100	24735	898	703	146.31	0.603	4.20232
90	0.571	255	255	255	17.707	21.682	2.562	145.661	100	18870	188	254	22.166	0.667	3.84108
67	1.397	255	255	255	76.017	18.393	2.572	356.278	100	46155	864	196	97.853	1.789	1.43767
44	1.096	255	255	255	80.474	14.156	2.585	279.511	100	36210	899	160	9.782	1.217	2.12408
266	1.042	255	255	255	40.29	67.87	2.602	265.732	100	34425	443	772	11.689	0.979	2.65781
188	2.385	255	255	255	63.009	48.561	2.707	608.232	100	78795	705	559	35.754	2.019	1.34076
104	1.15	255	255	255	19.694	24.611	2.729	293.29	100	37995	214	289	56.821	1.127	2.42147
84	1.644	255	255	255	50.376	21.623	2.736	419.267	100	54315	559	246	174.472	1.669	1.6393
65	2.015	255	255	255	79.409	18.154	2.745	513.749	100	66555	892	216	50.194	1.869	1.4687
286	1.189	255	255	255	53.298	72.395	2.774	303.132	100	39270	590	818	169.046	1.297	2.13878
298	1.606	255	255	255	48.473	75.309	2.803	409.425	100	53040	543	843	122.196	0.933	3.00429
235	1.088	255	255	255	40.848	63.661	2.829	277.543	100	35955	449	735	36.158	1.12	2.52589
121	0.911	255	255	255	48.64	27.754	2.89	232.27	100	30090	550	300	109.537	0.817	3.53733
285	2.069	255	255	255	22.639	72.515	2.901	527.528	100	68340	243	818	144.866	1.793	1.61796
135	0.787	255	255	255	48.013	29.854	2.936	200.776	100	26010	531	330	141.072	0.72	4.07778
38	1.135	255	255	255	20.748	13.658	2.946	289.353	100	37485	227	138	107.354	1.542	1.91051
68	0.787	255	255	255	30.385	18.709	2.946	200.776	100	26010	337	198	107.354	0.883	3.33635
178	1.289	255	255	255	62.638	45.554	2.947	328.721	100	42585	699	531	26.565	1.363	2.16214
306	1.953	255	255	255	76.793	76.788	2.947	498.002	100	64515	858	881	26.565	1.624	1.81466
62	1.328	255	255	255	64.521	17.885	3.026	338.563	100	43860	730	191	115.821	1.172	2.58191
234	0.957	255	255	255	36.571	63.846	3.03	244.08	100	31620	407	713	119.539	0.647	4.68315
122	2.069	255	255	255	24.622	27.841	3.035	527.528	100	68340	271	305	112.109	1.747	1.73726
275	1.42	255	255	255	53.718	70.132	3.069	362.184	100	46920	595	805	23.629	1.063	2.88711
330	1.142	255	255	255	35.128	89.464	3.069	291.322	100	37740	382	1024	23.629	1.073	2.86021
74	1.837	255	255	255	20.556	19.058	3.085	468.477	100	60690	221	210	160.017	1.711	1.80304
3	1.305	255	255	255	25.358	1.677	3.12	332.658	100	43095	273	26	32.347	1.66	1.87952
78	1.474	255	255	255	71.755	20.945	3.185	375.962	100	48705	811	221	114.444	1.375	2.31636
202	1.768	255	255	255	17.218	56.119	3.261	450.761	100	58395	181	651	27.255	1.37	2.38029
232	0.726	255	255	255	16.039	63.935	3.293	185.029	100	23970	178	748	80.789	0.699	4.71102
130	1.768	255	255	255	55.622	29.727	3.426	450.761	100	58395	625	357	67.38	1.127	3.03993
283	3.203	255	255	255	81.471	72.249	3.444	816.881	100	105825	912	826	174.144	2.374	1.45072
187	1.189	255	255	255	60.361	48.59	3.462	303.132	100	39270	671	565	35.707	0.891	3.88552
29	1.513	255	255	255	57.107	11.524	3.534	385.804	100	49980	637	118	124.875	1.481	2.38623
239	1.899	252.927	0	255	41.93	64.697	3.568	480.287	99.187	62220	466	757	52.001	1.615	2.20929
265	1.498	255	255	255	6.771	68.006	3.704	381.867	100	49470	56	764	157.694	1.12	3.30714
173	2.092	255	255	255	64.404	43.745	3.733	533.433	100	69105	714	484	153.435	1.204	3.1005
99	4.747	251.268	0	255	45.822	24.314	3.831	1192.84	98.537	154530	504	269	143.393	2.861	1.33904
267	3.366	255	255	255	79.266	68.825	3.854	858.218	100	111180	886	766	114.228	2.468	1.56159
73	3.119	250.582	0	255	28.4	19.759	4.07	781.45	98.267	101235	312	208	103.736	2.154	1.88951
51	3.944	254.501	0	255	81.732	16.684	4.24	1003.88	99.804	130050	913	174	124.019	2.7	1.57037
116	3.721	243.361	0	255	43.337	27.293	4.481	905.459	95.436	117300	483	289	118.072	2.453	1.82674
152	5.357	255	255	255	40.937	36.938	4.512	1366.06	100	176970	455	391	96.71	3.481	1.29618
166	4.709	236.607	0	255	40.955	41.028	4.518	1114.11	92.787	144330	455	445	103.496	1.91	2.36545
30	2.709	255	255	255	31.076	12.186	4.559	690.904	100	89505	339	165	62.447	2.154	2.11653
277	6.337	250.962	0	255	36.01	72.195	4.59	1590.46	98.417	206040	412	792	95.492	3.223	1.42414
8	2.146	255	255	255	28.474	5.699	5.328	547.212	100	70890	319	27	103.349	1.596	3.33835
19	3.867	233.623	0	255	29.518	9.029	5.582	903.49	91.617	117045	304	121	28.179	2.462	2.26726
6	0.224	255	255	255	1.544	1.592	0.634	57.083	100	7395	16	15	123.69	0.527	1.20304
277	0.224	255	255	255	89.242	63.142	0.634	57.083	100	7395	1013	716	123.69	0.527	1.20304
85	0.247	255	255	255	68.167	19.123	0.669	62.988	100	8160	774	221	66.801	0.527	1.26945
39	0.278	255	255	255	2.658	9.528	0.686	70.862	100	9180	27	106	129.806	0.615	1.11545
233	0.27	255	255	255	62.539	54.386	0.686	68.894	100	8925	709	616	129.806	0.615	1.11545
294	0.208	255	255	255	19.994	65.801	0.686	53.146	100	6885	225	746	129.806	0.439	1.56264
364	0.201	255	255	255	0.216	80.259	0.686	51.178	100	6630	0	910	129.806	0.527	1.30171
148	0.201	255	255	255	50.982	37.141	0.708	51.178	100	6630	578	426	60.255	0.439	1.61276
344	0.208	255	255	255	38.526	77.61	0.708	53.146	100	6885	436	880	119.745	0.439	1.61276
377	0.27	255	255	255	35.755	83.59	0.708	68.894	100	8925	405	955	60.255	0.527	1.34345
393	0.208	255	255	255	30.791	87.265	0.708	53.146	100	6885	347	991	150.255	0.439	1.61276
397	0.301	255	255	255	13.101	88.423	0.708	76.767	100	9945	147	1003	119.745	0.615	1.15122
64	0.208	255	255	255	68.505	14.179	0.725	53.146	100	6885	776	163	14.036	0.439	1.65148
122	0.208	255	255	255	25.123	32.601	0.725	53.146	100	6885	282	373	14.036	0.597	1.21441
183	0.201	255	255	255	28.676	43.341	0.725	51.178	100	6630	326	489	104.036	0.432	1.67824
12	0.309	255	255	255	7.396	2.284	0.746	78.736	100	10200	81	29	45	0.615	1.21301
399	0.232	255	255	255	1.69	89.352	0.751	59.052	100	7650	15	1016	159.444	0.351	2.1396
343	0.27	255	255	255	16.659	77.623	0.756	68.894	100	8925	186	885	35.538	0.611	1.23732
354	0.286	255	255	255	76.006	78.502	0.756	72.83	100	9435	862	891	125.538	0.618	1.2233
49	0.216	255	255	255	22.636	11.56	0.786	55.115	100	7140	254	134	26.565	0.414	1.89855
204	0.278	255	255	255	86.575	47.903	0.786	70.862	100	9180	984	550	63.435	0.615	1.27805
262	0.232	255	255	255	58.432	60.453	0.786	59.052	100	7650	661	686	153.435	0.439	1.79043
385	0.216	255	255	255	71.254	86.171	0.786	55.115	100	7140	807	978	153.435	0.487	1.61396
387	0.286	255	255	255	72.694	86.54	0.786	72.83	100	9435	824	982	153.435	0.604	1.30132
99	0.309	255	255	255	71.664	25.523	0.796	78.736	100	10200	815	286	96.34	0.609	1.30706
31	0.247	255	255	255	3.495	7.199	0.81	62.988	100	8160	35	81	167.471	0.5	1.62
100	0.201	255	255	255	48.079	25.658	0.81	51.178	100	6630	547	288	102.529	0.351	2.30769
297	0.247	255	255	255	22.157	66.548	0.81	62.988	100	8160	249	754	139.399	0.497	1.62978
368	0.347	255	255	255	14.779	80.892	0.81	88.577	100	11475	164	918	139.399	0.682	1.18768
30	0.247	255	255	255	73.085	7.144	0.829	62.988	100	8160	828	84	32.005	0.527	1.57306
65	0.363	255	255	255	24.246	14.799	0.829	92.514	100	11985	272	171	32.005	0.615	1.34797
81	0.255	255	255	255	68.915	18.199	0.829	64.957	100	8415	781	204	147.995	0.527	1.57306
92	0.262	255	255	255	75.696	21.67	0.829	66.925	100	8670	859	251	57.995	0.527	1.57306
240	0.239	255	255	255	6.818	56.313	0.829	61.02	100	7905	75	645	57.995	0.527	1.57306
263	0.278	255	255	255	6.34	60.703	0.829	70.862	100	9180	70	695	57.995	0.527	1.57306
394	0.324	255	255	255	37.005	87.949	0.829	82.672	100	10710	418	1004	32.005	0.682	1.21554
323	0.262	255	255	255	24.215	73.597	0.834	66.925	100	8670	273	842	71.565	0.439	1.89977
106	0.262	255	255	255	73.142	27.916	0.865	66.925	100	8670	828	316	156.038	0.471	1.83652
114	0.255	255	255	255	73.907	29.94	0.865	64.957	100	8415	838	336	113.962	0.572	1.51224
302	0.201	255	255	255	33.62	67.908	0.865	51.178	100	6630	378	771	156.038	0.351	2.46439
356	0.201	255	255	255	41.442	78.752	0.865	51.178	100	6630	470	901	66.038	0.354	2.4435
370	0.355	255	255	255	4.488	81.424	0.865	90.546	100	11730	49	931	66.038	0.527	1.64137
386	0.293	255	255	255	75.253	86.344	0.87	74.799	100	9690	853	980	135	0.604	1.4404
37	0.432	255	255	255	1.906	8.646	0.879	110.23	100	14280	19	94	126.87	0.703	1.25036
160	0.347	249.333	0	255	31.9	39.551	0.879	86.609	97.778	11220	360	446	126.87	0.615	1.42927
192	0.293	255	255	255	74.009	44.285	0.879	74.799	100	9690	839	508	53.13	0.536	1.63993
218	0.278	255	255	255	35.593	50.699	0.879	70.862	100	9180	401	580	53.13	0.545	1.61284
253	0.239	255	255	255	10.471	58.66	0.879	61.02	100	7905	116	665	143.13	0.497	1.76861
306	0.232	255	255	255	19.086	68.811	0.879	59.052	100	7650	215	787	53.13	0.506	1.73715
102	0.278	255	255	255	57.43	25.999	0.896	70.862	100	9180	653	301	78.69	0.439	2.041
80	0.208	255	255	255	71.955	17.837	0.905	53.146	100	6885	817	207	60.945	0.497	1.82093
197	0.255	255	255	255	49.399	46.969	0.905	64.957	100	8415	558	538	29.055	0.55	1.64545
207	0.34	255	255	255	67.639	48.304	0.905	86.609	100	11220	765	547	150.945	0.615	1.47154
349	0.262	255	255	255	36.645	78.174	0.905	66.925	100	8670	413	893	29.055	0.49	1.84694
119	0.293	255	255	255	27.428	31.849	0.917	74.799	100	9690	307	362	16.699	0.592	1.54899
13	0.286	255	255	255	3.204	2.388	0.946	72.83	100	9435	31	29	21.801	0.511	1.85127
21	0.394	235	0	255	31.087	4.189	0.946	92.514	92.157	11985	349	45	158.199	0.615	1.53821
145	0.355	249.457	0	255	68.618	37.004	0.946	88.577	97.826	11475	776	419	158.199	0.615	1.53821
254	0.232	255	255	255	32.411	58.666	0.946	59.052	100	7650	364	665	158.199	0.398	2.37688
17	0.332	255	255	255	49.343	3.628	0.95	84.641	100	10965	557	44	33.69	0.559	1.69946
182	0.239	255	255	255	73.984	43.296	0.95	61.02	100	7905	839	497	56.31	0.48	1.97917
242	0.201	255	255	255	65.566	56.801	0.95	51.178	100	6630	742	649	33.69	0.39	2.4359
268	0.332	237.209	0	255	17.121	62.117	0.95	78.736	93.023	10200	191	711	56.31	0.575	1.65217
287	0.34	255	255	255	5.489	65.327	0.95	86.609	100	11220	60	748	56.31	0.703	1.35135
328	0.27	255	255	255	17.375	74.495	0.95	68.894	100	8925	194	851	33.69	0.469	2.02559
366	0.54	255	255	255	3.631	80.712	0.95	137.787	100	17850	38	923	56.31	0.791	1.20101
35	0.486	255	255	255	38.225	8.027	0.982	124.008	100	16065	435	86	100.305	0.703	1.39687
259	0.201	255	255	255	32.748	59.122	0.982	51.178	100	6630	367	674	10.305	0.351	2.79772
274	0.293	255	255	255	63.409	63.309	0.982	74.799	100	9690	719	725	63.435	0.527	1.86338
353	0.27	255	255	255	69.967	78.442	0.982	68.894	100	8925	791	893	10.305	0.497	1.97586
357	0.471	255	255	255	67.1	79.439	0.982	120.072	100	15555	761	909	63.435	0.703	1.39687
273	0.216	255	255	255	62.138	62.998	0.994	55.115	100	7140	703	721	45	0.373	2.66488
29	0.432	255	255	255	21.296	6.536	1.002	110.23	100	14280	237	76	15.255	0.615	1.62927
47	0.216	255	255	255	73.334	11.252	1.002	55.115	100	7140	829	130	15.255	0.347	2.88761
117	0.401	255	255	255	88.638	31.563	1.002	102.356	100	13260	1006	365	52.125	0.703	1.42532
230	0.378	255	255	255	68.307	53.428	1.002	96.451	100	12495	774	613	52.125	0.611	1.63993
373	0.324	255	255	255	36.698	82.263	1.002	82.672	100	10710	417	942	74.745	0.439	2.28246
374	0.363	255	255	255	70.481	82.407	1.002	92.514	100	11985	799	942	52.125	0.629	1.593
23	0.648	255	255	255	12.264	5.104	1.025	165.345	100	21420	137	53	120.964	0.879	1.1661
32	0.641	255	255	255	9.214	7.562	1.025	163.376	100	21165	102	81	120.964	0.879	1.1661
105	0.262	255	255	255	46.289	27.575	1.025	66.925	100	8670	524	319	59.036	0.527	1.94497
234	0.347	255	255	255	86.747	54.534	1.025	88.577	100	11475	982	624	30.964	0.55	1.86364
255	0.448	255	255	255	66.394	58.89	1.025	114.167	100	14790	753	665	120.964	0.661	1.55068
348	0.232	255	255	255	35.814	78.376	1.025	59.052	100	7650	405	897	59.036	0.39	2.62821
384	0.432	255	255	255	45.547	85.487	1.025	110.23	100	14280	513	970	149.036	0.615	1.66667
26	0.27	255	255	255	9.229	5.968	1.028	68.894	100	8925	100	65	160.017	0.419	2.45346
41	0.401	255	255	255	23.86	10.496	1.028	102.356	100	13260	269	114	109.983	0.527	1.95066
281	0.239	255	255	255	30.128	63.736	1.028	61.02	100	7905	337	724	160.017	0.392	2.62245
318	0.34	255	255	255	52.206	72.545	1.028	86.609	100	11220	592	831	70.017	0.527	1.95066
295	0.278	255	255	255	56.769	66.368	1.058	70.862	100	9180	641	759	41.634	0.492	2.15041
376	0.401	255	255	255	18.788	83.184	1.069	102.356	100	13260	208	945	170.538	0.527	2.02846
201	0.371	255	255	255	52.324	47.49	1.072	94.483	100	12240	593	546	55.008	0.786	1.36387
215	0.293	255	255	255	66.19	49.913	1.072	74.799	100	9690	748	572	34.992	0.495	2.16566
312	0.332	255	255	255	6.096	70.832	1.072	84.641	100	10965	64	803	145.008	0.585	1.83248
57	0.324	255	255	255	63.426	13.141	1.087	82.672	100	10710	716	152	14.036	0.527	2.06262
107	0.324	255	255	255	83.068	28.102	1.087	82.672	100	10710	945	327	75.964	0.615	1.76748
390	0.432	255	255	255	66.788	87.019	1.087	110.23	100	14280	757	997	75.964	0.791	1.37421
221	0.641	255	255	255	67.551	51.58	1.101	163.376	100	21165	765	582	118.61	0.964	1.14212
327	0.309	255	255	255	24.405	74.495	1.101	78.736	100	10200	273	843	151.39	0.565	1.94867
332	0.301	255	255	255	71.784	75.663	1.101	76.767	100	9945	812	859	151.39	0.523	2.10516
28	0.54	255	255	255	1.757	6.607	1.111	137.787	100	17850	15	73	161.565	0.703	1.58037
70	0.324	255	255	255	59.734	15.938	1.111	82.672	100	10710	678	175	108.435	0.447	2.48546
208	0.286	255	255	255	41.406	48.606	1.111	72.83	100	9435	469	559	71.565	0.405	2.74321
103	0.239	255	255	255	49.514	25.979	1.142	61.02	100	7905	558	293	157.38	0.404	2.82673
112	0.648	255	255	255	77.083	29.545	1.142	165.345	100	21420	872	333	157.38	0.791	1.44374
130	0.347	255	255	255	54.085	34.082	1.142	88.577	100	11475	613	394	67.38	0.439	2.60137
147	0.378	255	255	255	33.475	37.334	1.142	96.451	100	12495	380	419	112.62	0.864	1.32176
175	0.301	255	255	255	47.084	42.013	1.142	76.767	100	9945	532	472	112.62	0.556	2.05396
362	0.525	255	255	255	22.204	80.414	1.142	133.85	100	17340	247	913	157.38	0.879	1.2992
33	0.687	255	255	255	18.68	8.015	1.146	175.187	100	22695	207	95	32.471	0.87	1.31724
53	0.509	255	255	255	3.818	12.895	1.146	129.914	100	16830	38	151	32.471	0.668	1.71557
77	0.718	255	255	255	15.721	17.427	1.146	183.06	100	23715	175	193	122.471	0.879	1.30375
109	0.293	255	255	255	46.17	29.417	1.146	74.799	100	9690	521	340	57.529	0.49	2.33878
260	0.34	255	255	255	65.119	60.281	1.146	86.609	100	11220	734	684	147.529	0.707	1.62093
298	0.301	255	255	255	47.416	67.209	1.146	76.767	100	9945	534	769	32.471	0.463	2.47516
334	0.286	255	255	255	16.749	76.066	1.146	72.83	100	9435	187	871	57.529	0.432	2.65278
66	0.378	255	255	255	66.033	15.389	1.172	96.451	100	12495	745	177	12.995	0.5	2.344
222	0.448	255	255	255	72.776	52.017	1.172	114.167	100	14790	827	598	77.005	0.615	1.90569
375	0.401	255	255	255	14.49	82.893	1.172	102.356	100	13260	163	937	102.995	0.527	2.22391
101	0.255	255	255	255	88.523	25.826	1.179	64.957	100	8415	1004	300	63.435	0.393	3
335	0.27	255	255	255	24.408	76.75	1.179	68.894	100	8925	274	867	116.565	0.424	2.78066
10	0.316	255	255	255	66.821	2.225	1.182	80.704	100	10455	756	30	41.987	0.435	2.71724
224	0.386	255	255	255	35.423	52.728	1.182	98.419	100	12750	399	605	41.987	0.658	1.79635
25	0.432	250.446	0	255	10.339	5.94	1.195	108.261	98.214	14025	114	64	143.973	0.806	1.48263
86	0.401	255	255	255	78.838	19.621	1.195	102.356	100	13260	891	227	36.027	0.565	2.11504
87	0.309	255	255	255	77.742	19.858	1.195	78.736	100	10200	881	221	126.027	0.471	2.53715
118	0.347	255	255	255	82.141	32.095	1.195	88.577	100	11475	933	371	72.897	0.511	2.33855
133	0.394	255	255	255	49.922	34.409	1.195	100.388	100	13005	564	398	53.973	0.621	1.92432
173	0.255	255	255	255	83.678	41.835	1.195	64.957	100	8415	951	470	107.103	0.39	3.0641
176	0.602	248.462	0	255	18.393	42.372	1.195	149.598	97.436	19380	203	487	53.973	0.911	1.31175
184	0.301	255	255	255	52.478	43.671	1.195	76.767	100	9945	596	503	72.897	0.445	2.68539
250	0.432	255	255	255	57.541	58.666	1.195	110.23	100	14280	653	674	72.897	0.527	2.26755
296	0.409	255	255	255	5.998	66.586	1.195	104.325	100	13515	63	763	53.973	0.74	1.61486
16	0.664	255	255	255	1.072	3.168	1.221	169.281	100	21930	9	42	59.744	0.816	1.49632
19	0.463	255	255	255	10.268	4.042	1.221	118.103	100	15300	113	41	120.256	0.621	1.96618
202	0.401	255	255	255	63.63	47.665	1.221	102.356	100	13260	719	538	149.744	0.703	1.73684
128	0.247	255	255	255	85.407	33.395	1.224	62.988	100	8160	970	387	68.962	0.341	3.58944
181	0.432	255	255	255	53.941	43.211	1.224	110.23	100	14280	607	497	21.038	0.867	1.41176
249	0.409	255	255	255	35.113	58.324	1.224	104.325	100	13515	394	667	21.038	0.65	1.88308
308	0.587	255	255	255	29.554	69.456	1.224	149.598	100	19380	330	792	21.038	0.733	1.66985
388	0.54	255	255	255	39.204	86.855	1.224	137.787	100	17850	444	982	111.038	0.527	2.32258
89	0.316	255	255	255	53.736	20.558	1.233	80.704	100	10455	605	232	175.914	0.558	2.20968
96	0.27	255	255	255	74.458	22.872	1.243	68.894	100	8925	840	261	171.87	0.527	2.35863
172	0.34	255	255	255	15.114	41.769	1.243	86.609	100	11220	168	470	135	0.648	1.91821
200	0.355	255	255	255	76.294	47.513	1.249	90.546	100	11730	864	546	50.711	0.471	2.6518
320	0.594	255	255	255	57.844	73.003	1.249	151.566	100	19635	654	825	129.289	0.853	1.46424
322	0.347	255	255	255	17.514	73.609	1.249	88.577	100	11475	195	843	50.711	0.435	2.87126
378	0.455	255	255	255	70.76	83.918	1.249	116.135	100	15045	799	950	129.289	0.786	1.58906
59	0.347	255	255	255	67.869	13.231	1.258	88.577	100	11475	765	151	12.095	0.517	2.43327
110	0.324	255	255	255	82.2	29.621	1.258	82.672	100	10710	934	345	77.905	0.615	2.04553
206	0.409	255	255	255	30.14	48.189	1.258	104.325	100	13515	336	550	24.775	0.528	2.38258
270	0.648	255	255	255	64.098	62.242	1.258	165.345	100	21420	724	705	155.225	0.825	1.52485
361	0.432	255	255	255	40.939	80.217	1.258	110.23	100	14280	466	920	77.905	0.596	2.11074
22	0.679	255	255	255	59.35	4.421	1.267	173.218	100	22440	671	56	56.31	0.915	1.3847
58	0.494	255	255	255	40.324	13.14	1.279	125.977	100	16320	452	152	15.945	0.439	2.91344
154	0.309	255	255	255	86.185	38.632	1.279	78.736	100	10200	981	448	74.055	0.615	2.07967
279	0.293	255	255	255	44.302	63.536	1.279	74.799	100	9690	497	720	164.055	0.448	2.85491
340	0.672	255	255	255	54.726	77.126	1.279	171.25	100	22185	616	881	15.945	0.776	1.6482
97	0.239	255	255	255	56.741	23.247	1.297	61.02	100	7905	643	258	118.301	0.331	3.91843
142	0.363	255	255	255	66.691	36.769	1.297	92.514	100	11985	757	426	61.699	0.471	2.75372
210	0.309	255	255	255	68.668	49.027	1.297	78.736	100	10200	778	564	61.699	0.393	3.30025
239	0.316	255	255	255	10.058	56.175	1.297	80.704	100	10455	109	634	118.301	0.747	1.73628
288	0.286	255	255	255	41.226	65.382	1.297	72.83	100	9435	466	739	118.301	0.791	1.6397
67	0.471	250.82	0	255	26.354	15.442	1.306	118.103	98.361	15300	294	178	19.654	0.615	2.12358
74	0.525	251.25	0	255	65.446	17.37	1.306	131.882	98.529	17085	739	201	42.274	0.829	1.57539
141	0.293	255	255	255	53.328	36.799	1.306	74.799	100	9690	602	423	42.274	0.435	3.0023
159	0.479	255	255	255	54.873	39.626	1.306	122.04	100	15810	618	455	42.274	0.732	1.78415
293	0.486	255	255	255	59.329	65.958	1.306	124.008	100	16065	670	756	47.726	0.559	2.33631
355	0.502	255	255	255	68.585	78.674	1.306	127.945	100	16575	775	897	19.654	0.787	1.65947
156	0.463	255	255	255	70.436	39.125	1.318	118.103	100	15300	796	451	36.87	0.64	2.05938
194	0.247	255	255	255	46.598	44.992	1.321	62.988	100	8160	523	511	176.186	0.351	3.76353
18	0.571	255	255	255	39.823	3.952	1.338	145.661	100	18870	445	49	23.199	0.791	1.69153
111	0.371	255	255	255	68.156	29.848	1.338	94.483	100	12240	772	332	113.199	0.495	2.70303
124	0.262	255	255	255	89.771	33.247	1.338	66.925	100	8670	1018	385	66.801	0.401	3.33666
321	0.448	255	255	255	26.779	73.508	1.338	114.167	100	14790	301	843	66.801	0.511	2.6184
330	0.448	255	255	255	32	74.762	1.338	114.167	100	14790	357	853	23.199	0.597	2.24121
68	0.316	255	255	255	55.629	15.683	1.341	80.704	100	10455	626	182	31.608	0.542	2.47417
290	0.355	255	255	255	3.115	65.587	1.341	90.546	100	11730	30	753	58.392	0.497	2.69819
44	0.247	255	255	255	35.586	11.559	1.364	62.988	100	8160	403	124	104.931	0.379	3.59894
309	0.525	255	255	255	28.205	69.421	1.364	133.85	100	17340	314	792	14.931	0.554	2.46209
371	0.386	255	255	255	12.799	81.299	1.364	98.419	100	12750	138	923	165.069	0.431	3.16473
379	0.486	255	255	255	69.794	84.079	1.364	124.008	100	16065	786	960	14.931	0.611	2.23241
380	0.255	255	255	255	1.338	84.024	1.364	64.957	100	8415	8	954	165.069	0.318	4.28931
286	0.463	255	255	255	8.149	65.301	1.367	118.103	100	15300	87	749	45	0.668	2.04641
79	0.594	255	255	255	78.061	17.812	1.375	151.566	100	19635	884	210	63.435	0.791	1.73831
185	0.602	255	255	255	84.593	43.756	1.375	153.534	100	19890	959	506	63.435	0.767	1.7927
352	0.401	255	255	255	53.849	78.71	1.375	102.356	100	13260	608	903	63.435	0.588	2.33844
82	0.432	255	255	255	57.03	18.78	1.389	110.23	100	14280	644	220	55.305	0.588	2.36224
88	0.479	255	255	255	50.274	20.473	1.389	122.04	100	15810	568	240	55.305	0.668	2.07934
228	0.44	255	255	255	6.724	53.092	1.389	112.198	100	14535	69	607	18.435	0.766	1.81332
333	0.432	255	255	255	61.785	76.108	1.389	110.23	100	14280	701	859	108.435	0.513	2.7076
5	0.594	255	255	255	42.711	1.6	1.417	151.566	100	19635	482	11	119.745	0.609	2.32677
75	0.425	255	255	255	25.489	17.488	1.419	108.261	100	14025	287	207	68.199	0.469	3.02559
244	0.224	255	255	255	60.597	57.082	1.419	57.083	100	7395	682	653	21.801	0.32	4.43438
278	0.764	255	255	255	8.907	63.825	1.419	194.87	100	25245	98	735	68.199	1.139	1.24583
285	0.494	255	255	255	60.779	64.665	1.419	125.977	100	16320	688	729	111.801	0.603	2.35323
301	0.517	255	255	255	57.269	68.245	1.419	131.882	100	17085	649	769	111.801	0.509	2.78782
369	0.726	255	255	255	20.238	81.544	1.419	185.029	100	23970	225	921	111.801	0.994	1.42757
359	0.286	255	255	255	67.557	79.943	1.43	72.83	100	9435	763	916	47.49	0.435	3.28736
360	0.502	255	255	255	17.805	80.458	1.43	127.945	100	16575	204	906	100.62	0.857	1.66861
191	0.463	255	255	255	38.586	44.547	1.449	118.103	100	15300	437	515	75.964	0.49	2.95714
389	0.44	255	255	255	22.423	86.653	1.449	112.198	100	14535	247	988	14.036	0.439	3.30068
398	0.201	255	255	255	18.802	89.052	1.454	51.178	100	6630	207	1010	154.983	0.314	4.63057
150	0.417	255	255	255	73.811	38.035	1.462	106.293	100	13770	836	441	57.265	0.511	2.86106
178	0.324	255	255	255	59.462	42.589	1.462	82.672	100	10710	672	492	57.265	0.432	3.38426
211	0.425	255	255	255	32.264	49.256	1.462	108.261	100	14025	362	554	122.735	0.521	2.80614
238	0.378	255	255	255	67.277	55.976	1.473	96.451	100	12495	762	645	72.646	0.676	2.17899
193	0.455	255	255	255	15.017	45.454	1.494	116.135	100	15045	166	524	61.928	0.511	2.92368
189	0.517	255	255	255	73.098	44.271	1.496	131.882	100	17085	826	510	40.236	0.722	2.07202
246	0.386	255	255	255	63.719	57.467	1.496	98.419	100	12750	719	661	49.764	0.463	3.2311
367	0.401	255	255	255	23.602	81.019	1.496	102.356	100	13260	264	929	49.764	0.439	3.40774
226	0.44	255	255	255	13.973	53.379	1.504	112.198	100	14535	158	599	96.71	0.517	2.90909
324	0.355	255	255	255	39.508	73.99	1.512	90.546	100	11730	444	835	125.538	0.388	3.89691
213	0.309	255	255	255	74.135	49.612	1.534	78.736	100	10200	840	572	66.371	0.35	4.38286
258	0.594	255	255	255	26.812	59.304	1.534	151.566	100	19635	297	679	23.629	0.669	2.29297
303	0.417	255	255	255	53.625	69.015	1.534	106.293	100	13770	608	777	103.241	0.448	3.42411
311	0.625	255	255	255	33.315	70.699	1.534	159.439	100	20655	372	808	23.629	0.703	2.18208
42	0.641	255	255	255	27.696	10.823	1.537	163.376	100	21165	309	130	59.036	0.757	2.03038
177	0.571	255	255	255	14.091	42.461	1.537	145.661	100	18870	155	478	149.036	0.892	1.72309
269	0.486	255	255	255	61.551	62.421	1.537	124.008	100	16065	696	718	59.036	0.49	3.13673
166	0.633	255	255	255	33.243	41.533	1.557	161.408	100	20910	375	463	106.39	0.852	1.82746
46	0.309	255	255	255	28.877	11.635	1.564	78.736	100	10200	324	139	51.843	0.357	4.38095
280	0.563	255	255	255	5.79	63.898	1.564	143.692	100	18615	59	734	38.157	0.825	1.89576
170	0.548	251.408	0	255	38.676	41.998	1.572	137.787	98.592	17850	433	484	63.435	0.982	1.60081
2	1.019	255	255	255	68.509	0.869	1.584	259.827	100	33660	777	17	70.56	1.125	1.408
167	0.27	255	255	255	48.467	41.694	1.591	68.894	100	8925	551	465	96.34	0.264	6.02652
3	0.417	255	255	255	62.009	1.097	1.603	106.293	100	13770	707	23	80.538	0.703	2.28023
243	0.664	255	255	255	7.198	57.401	1.603	169.281	100	21930	79	644	99.462	0.701	2.28673
98	0.772	255	255	255	46.385	24.96	1.613	196.839	100	25500	521	291	29.358	1.286	1.25428
138	0.409	255	255	255	19.491	35.793	1.615	104.325	100	13515	218	399	112.38	0.53	3.04717
121	0.517	255	255	255	49.528	32.442	1.62	131.882	100	17085	561	380	77.471	0.766	2.11488
209	0.687	255	255	255	74.967	49.125	1.62	175.187	100	22695	850	567	77.471	0.638	2.53918
214	0.494	255	255	255	61.611	49.782	1.62	125.977	100	16320	700	576	77.471	0.439	3.69021
158	0.44	255	255	255	23.351	39.306	1.641	112.198	100	14535	258	445	164.476	0.5	3.282
292	0.764	255	255	255	16.852	65.94	1.641	194.87	100	25245	183	750	164.476	0.966	1.69876
363	0.262	255	255	255	28.198	80.171	1.641	66.925	100	8670	311	914	15.524	0.347	4.72911
283	0.803	247.644	0	255	6.518	64.477	1.651	198.807	97.115	25755	72	743	64.799	1.038	1.59056
382	0.54	255	255	255	72.096	85.323	1.651	137.787	100	17850	816	963	115.201	0.633	2.60821
266	0.502	255	255	255	47.877	61.761	1.667	127.945	100	16575	539	705	18.435	0.791	2.10746
326	0.525	255	255	255	21.523	74.159	1.679	133.85	100	17340	237	844	173.991	0.736	2.28125
135	0.533	255	255	255	75.718	34.977	1.69	135.819	100	17595	853	400	8.973	0.439	3.84966
351	0.618	255	255	255	22.262	78.883	1.69	157.471	100	20400	250	889	98.973	0.846	1.99764
282	0.826	255	255	255	48.695	64.155	1.706	210.618	100	27285	544	731	168.111	1.313	1.29931
34	0.618	255	255	255	30.769	7.936	1.726	157.471	100	20400	341	88	165.256	0.679	2.54197
43	0.494	255	255	255	68.949	10.952	1.726	125.977	100	16320	776	127	14.744	0.432	3.99537
131	0.996	255	255	255	32.223	34.298	1.726	253.922	100	32895	357	394	14.744	1.129	1.52879
174	0.648	255	255	255	37.49	42.346	1.726	165.345	100	21420	423	491	75.256	0.777	2.22136
196	0.54	255	255	255	84.637	46.417	1.726	137.787	100	17850	961	537	75.256	0.472	3.65678
24	0.324	255	255	255	41.289	5.456	1.731	82.672	100	10710	462	58	156.038	0.361	4.79501
310	0.826	255	255	255	26.354	70.518	1.733	210.618	100	27285	292	808	30.466	0.674	2.57122
164	0.262	255	255	255	77.28	40.86	1.74	66.925	100	8670	873	473	45	0.311	5.59486
129	0.517	255	255	255	52.903	34.036	1.757	131.882	100	17085	594	393	36.87	0.487	3.6078
153	0.618	255	255	255	51.15	38.658	1.757	157.471	100	20400	575	446	36.87	0.649	2.70724
163	0.44	255	255	255	59.554	40.536	1.757	112.198	100	14535	669	454	143.13	0.641	2.74103
339	1.281	255	255	255	17.794	77.041	1.757	326.753	100	42330	195	883	36.87	1.056	1.66383
63	0.888	228.391	0	255	62.351	14.297	1.777	202.744	89.565	26265	700	163	171.469	0.776	2.28995
272	0.88	255	255	255	4.461	63.118	1.777	224.396	100	29070	41	720	8.531	0.853	2.08324
299	0.973	255	255	255	27.68	67.789	1.779	248.017	100	32130	309	780	57.095	0.826	2.15375
345	0.803	255	255	255	67.612	78.258	1.779	204.712	100	26520	766	882	110.225	0.791	2.24905
336	0.34	255	255	255	29.373	77.126	1.792	86.609	100	11220	331	887	78.69	0.485	3.69485
190	0.533	255	255	255	77.911	44.052	1.811	135.819	100	17595	877	498	165.964	0.485	3.73402
199	0.672	255	255	255	62.084	47.474	1.811	171.25	100	22185	700	549	50.906	0.633	2.86098
225	0.502	255	255	255	59.682	53.132	1.811	127.945	100	16575	670	612	39.094	0.683	2.65154
248	0.425	255	255	255	68.083	58.4	1.811	108.261	100	14025	767	672	39.094	0.545	3.32294
276	0.494	255	255	255	52.276	63.543	1.811	125.977	100	16320	586	729	39.094	0.479	3.78079
307	0.54	255	255	255	70.129	69.324	1.811	137.787	100	17850	794	798	67.166	0.531	3.41055
61	0.486	255	255	255	73.278	14.428	1.828	124.008	100	16065	829	173	54.782	0.5	3.656
149	1.003	251.077	0	255	19.511	37.931	1.828	251.954	98.462	32640	220	441	54.782	1.333	1.37134
162	1.243	251.832	0	255	86.017	40.279	1.853	312.974	98.758	40545	970	466	31.43	1.334	1.38906
245	0.625	255	255	255	50.006	57.688	1.853	159.439	100	20655	560	660	31.43	1.037	1.78689
71	0.71	255	255	255	69.238	16.13	1.868	181.092	100	23460	780	176	131.186	0.675	2.76741
137	0.61	255	255	255	76.823	35.761	1.878	155.503	100	20145	872	419	79.216	0.578	3.24913
237	0.463	255	255	255	42.461	55.175	1.878	118.103	100	15300	473	625	169.216	0.476	3.94538
48	1.058	255	255	255	1.392	11.897	1.88	269.669	100	34935	10	145	52.595	0.892	2.10762
152	0.718	255	255	255	30.574	38.45	1.88	183.06	100	23715	340	447	37.405	0.928	2.02586
383	0.849	255	255	255	52.552	85.813	1.88	216.523	100	28050	589	983	37.405	0.678	2.77286
256	0.633	255	255	255	46.289	59.101	1.893	161.408	100	20910	517	676	21.801	0.5	3.786
305	0.942	255	255	255	60.1	69.183	1.901	240.143	100	31110	677	778	123.69	0.905	2.10055
198	0.587	255	255	255	31.544	47.513	1.919	149.598	100	19380	360	553	74.055	1.045	1.83636
358	0.818	255	255	255	56.283	79.88	1.927	208.649	100	27030	634	918	46.848	0.65	2.96462
36	0.502	255	255	255	3.927	8.769	1.929	127.945	100	16575	40	110	59.931	0.542	3.55904
346	0.548	255	255	255	34.538	78.296	1.951	139.756	100	18105	386	902	54.162	0.534	3.65356
381	0.563	255	255	255	37.12	84.906	1.951	143.692	100	18615	415	975	54.162	0.463	4.21382
216	0.324	255	255	255	85.673	50.782	1.982	82.672	100	10710	973	590	77.196	0.335	5.91642
4	1.189	255	255	255	10.861	1.78	1.992	303.132	100	39270	114	26	41.424	1.118	1.78175
144	1.104	255	255	255	37.964	37.643	2.038	281.48	100	36465	431	440	82.569	0.703	2.899
261	0.455	255	255	255	34.147	61.343	2.038	116.135	100	15045	387	708	82.569	0.439	4.64237
56	0.579	255	255	255	14.035	13.176	2.044	147.629	100	19125	149	154	25.463	0.607	3.36738
264	0.672	255	255	255	49.367	61.549	2.044	171.25	100	22185	558	711	64.537	0.545	3.75046
126	0.741	255	255	255	76.076	33.468	2.051	188.965	100	24480	857	388	43.264	0.559	3.66905
289	1.142	255	255	255	62.839	65.553	2.057	291.322	100	37740	704	750	19.983	0.917	2.24318
391	0.749	255	255	255	53.729	87.217	2.068	190.934	100	24735	602	996	12.265	0.609	3.39573
235	0.533	255	255	255	63.818	55.125	2.083	135.819	100	17595	720	639	62.354	0.495	4.20808
227	0.764	255	255	255	32.988	53.131	2.088	194.87	100	25245	365	611	22.249	0.906	2.30464
7	0.386	255	255	255	57.475	2.177	2.112	98.419	100	12750	647	32	45	0.373	5.6622
45	0.818	255	255	255	36.666	11.428	2.125	208.649	100	27030	406	124	150.255	0.58	3.66379
83	0.463	255	255	255	71.959	19.3	2.138	118.103	100	15300	817	232	80.538	0.381	5.61155
223	0.818	255	255	255	57.357	52.676	2.138	208.649	100	27030	646	612	80.538	0.999	2.14014
186	0.363	255	255	255	75.803	43.848	2.14	92.514	100	11985	851	495	160.821	0.459	4.66231
275	1.212	255	255	255	18.761	63.634	2.14	309.037	100	40035	201	722	160.821	1.151	1.85925
188	0.594	255	255	255	17.03	44.833	2.161	151.566	100	19635	188	519	63.435	0.702	3.07835
50	0.872	255	255	255	43.737	12.049	2.17	222.428	100	28815	487	142	21.371	0.636	3.41195
146	0.517	255	255	255	84.062	37.636	2.196	131.882	100	17085	952	442	73.74	0.466	4.71245
165	0.371	255	255	255	43.325	41.601	2.196	94.483	100	12240	490	486	73.74	0.341	6.43988
337	0.772	255	255	255	70.218	77.105	2.202	196.839	100	25500	794	889	61.39	0.61	3.60984
134	1.258	255	255	255	78.567	35.779	2.203	320.847	100	41565	894	395	94.574	1.142	1.92907
161	0.371	255	255	255	79.009	40.596	2.24	94.483	100	12240	894	471	64.44	0.496	4.51613
232	1.436	255	255	255	9.059	54.45	2.24	366.12	100	47430	91	617	168.69	1.156	1.93772
205	1.135	255	255	255	86.129	49.042	2.281	289.353	100	37485	978	543	105.642	0.867	2.63091
169	0.965	255	255	255	71.183	42.18	2.284	246.049	100	31875	803	491	67.38	0.886	2.57788
347	0.687	255	255	255	59.087	78.685	2.291	175.187	100	22695	672	910	85.601	0.672	3.40923
84	0.841	255	255	255	76.601	19.434	2.299	214.554	100	27795	861	230	43.452	0.607	3.78748
151	1.907	250.87	0	255	33.868	38.854	2.32	478.318	98.381	61965	376	448	37.304	1.403	1.6536
392	1.027	255	255	255	67.602	88.032	2.326	261.796	100	33915	766	1015	79.114	0.801	2.90387
241	0.872	255	255	255	14.276	57.343	2.339	222.428	100	28815	157	663	55.713	0.943	2.48038
342	0.695	255	255	255	30.615	78.178	2.339	177.155	100	22950	341	879	124.287	0.463	5.05184
372	0.834	255	255	255	33.462	82.232	2.339	212.586	100	27540	372	929	124.287	1.287	1.8174
123	1.305	255	255	255	27.851	33.173	2.39	332.658	100	43095	308	389	53.973	0.992	2.40927
300	0.895	255	255	255	15.376	68.245	2.398	228.333	100	29580	173	764	98.427	0.661	3.62784
116	0.672	255	255	255	47.339	31.358	2.417	171.25	100	22185	537	371	70.907	1.044	2.31513
284	1.081	255	255	255	23.581	65.174	2.436	275.574	100	35700	262	753	64.359	1.422	1.71308
38	0.841	255	255	255	47.405	9.473	2.441	214.554	100	27795	528	121	59.744	1.336	1.8271
9	0.857	255	255	255	31.948	2.052	2.447	218.491	100	28305	352	19	158.962	0.598	4.09197
219	1.235	255	255	255	37.13	51.655	2.466	314.942	100	40800	424	603	85.914	1.002	2.46108
365	0.895	255	255	255	25.958	80.521	2.474	228.333	100	29580	282	921	16.504	0.703	3.5192
212	0.841	255	255	255	84.715	49.92	2.485	214.554	100	27795	963	583	81.87	0.615	4.04065
127	1.065	251.304	0	255	47.204	33.273	2.501	267.701	98.551	34680	526	374	161.565	1.486	1.68304
395	0.811	255	255	255	68.841	89.186	2.517	206.681	100	26775	773	1024	60.751	1.124	2.23932
329	0.872	245.973	0	255	54.405	75.514	2.562	214.554	96.46	27795	614	873	67.834	0.631	4.06022
40	0.973	255	255	255	76.48	10.327	2.584	248.017	100	32130	862	130	54.689	0.779	3.31707
315	0.733	255	255	255	38.157	71.542	2.594	186.997	100	24225	421	821	28.301	0.463	5.60259
171	0.648	255	255	255	69.805	42.14	2.609	165.345	100	21420	785	490	45	0.435	5.9977
52	0.78	255	255	255	27.967	13.648	2.643	198.807	100	25755	315	170	74.578	0.53	4.98679
143	1.667	255	255	255	86.989	37.586	2.676	425.172	100	55080	985	414	113.199	1.275	2.09882
11	1.343	255	255	255	5.653	2.71	2.678	342.5	100	44370	51	22	138.991	1.19	2.25042
91	0.764	255	255	255	66.374	22.093	2.682	194.87	100	25245	742	259	31.608	0.613	4.3752
304	1.15	255	255	255	36.008	68.785	2.688	293.29	100	37995	394	784	11.31	0.835	3.21916
265	2.362	215	0	255	24.984	61.851	2.689	507.844	84.314	65790	268	713	38.367	1.859	1.44648
291	1.058	255	255	255	68.675	66.046	2.707	269.669	100	34935	776	768	54.246	1.367	1.98025
73	1.081	255	255	255	21.03	17.132	2.712	275.574	100	35700	226	186	155.095	1.021	2.65622
217	0.772	255	255	255	31.634	51.141	2.714	196.839	100	25500	354	597	60.945	0.904	3.00221
350	1.189	253.344	0	255	24.737	79.301	2.714	301.163	99.351	39015	275	915	60.945	0.955	2.84188
140	0.973	255	255	255	85.968	36.761	2.729	248.017	100	32130	975	401	93.691	0.703	3.88193
60	0.625	255	255	255	32.546	14.187	2.736	159.439	100	20655	358	151	137.603	0.445	6.14831
231	1.59	255	255	255	36.867	54.711	2.791	405.488	100	52530	412	611	118.179	1.193	2.33948
252	1.351	255	255	255	35.719	59.136	2.791	344.468	100	44625	393	678	28.179	1.16	2.40603
203	0.664	249.07	0	255	34.51	48.707	2.829	165.345	97.674	21420	382	541	126.158	0.527	5.36812
94	0.749	255	255	255	69.492	22.768	2.836	190.934	100	24735	788	246	106.189	0.504	5.62698
27	1.783	255	255	255	16.113	6.905	2.839	454.698	100	58905	173	83	21.801	1.581	1.7957
155	0.811	255	255	255	53.057	39.748	2.869	206.681	100	26775	594	438	117.35	0.773	3.71151
93	1.745	252.743	0	255	50.641	22.85	2.878	440.919	99.115	57120	562	244	121.264	1.793	1.60513
115	0.919	255	255	255	54.454	31.315	2.947	234.238	100	30345	618	373	79.695	0.775	3.80258
331	2.509	245.585	0	255	25.734	76.801	2.973	616.106	96.308	79815	284	856	108.97	2.177	1.36564
195	1.042	255	255	255	20.613	45.863	2.999	265.732	100	34425	221	533	31.827	0.744	4.03091
20	0.965	255	255	255	6.259	4.337	3.03	246.049	100	31875	54	56	16.858	0.63	4.80952
267	1.521	255	255	255	7.458	62.716	3.03	387.773	100	50235	72	700	119.539	1.296	2.33796
104	1.397	255	255	255	75.819	26.508	3.05	356.278	100	46155	846	304	11.634	0.725	4.2069
271	1.258	255	255	255	64.243	63.679	3.06	320.847	100	41565	720	734	39.174	0.982	3.11609
1	1.374	255	255	255	34.364	1.049	3.109	350.373	100	45390	378	26	47.291	0.975	3.18872
78	2.262	255	255	255	66.099	18.89	3.12	576.738	100	74715	739	225	57.653	2.359	1.32259
15	1.227	255	255	255	59.136	3.16	3.185	312.974	100	40545	658	44	24.444	1.068	2.98221
55	1.266	255	255	255	65.42	13.154	3.198	322.816	100	41820	729	159	15.945	1.095	2.92055
396	2.007	255	255	255	73.383	88.631	3.223	511.781	100	66300	818	1013	17.447	1.06	3.04057
236	2.323	255	255	255	35.667	56.487	3.367	592.485	100	76755	389	651	172.504	2.811	1.19779
139	1.721	237.848	0	255	88.855	36.726	3.395	409.425	93.274	53040	1009	438	79.563	0.718	4.72841
319	1.768	253.886	0	255	62.434	73.326	3.412	448.793	99.563	58140	696	821	145.491	2.007	1.70005
247	2.416	254.185	0	255	28.7	58.134	3.417	614.137	99.681	79560	308	652	162.031	1.909	1.78994
341	2.231	241.765	0	255	26.608	78.197	3.431	539.339	94.81	69870	289	906	50.194	1.142	3.00438
220	2.586	255	255	255	10.097	52.226	3.461	659.41	100	85425	103	578	113.962	2.284	1.51532
338	2.64	254.254	0	255	28.212	78.305	3.476	671.221	99.708	86955	310	905	69.274	2.015	1.72506
76	1.521	255	255	255	75.813	17.971	3.485	387.773	100	50235	845	214	33.69	1.001	3.48152
325	1.413	250.82	0	255	30.868	74.574	3.605	354.31	98.361	45900	340	866	46.975	1.589	2.26872
251	3.806	237.931	0	255	11.985	59.922	3.618	905.459	93.306	117300	129	699	60.945	2.724	1.32819
113	3.728	238.634	0	255	72.473	30.642	3.619	889.712	93.582	115260	804	353	5.572	2.653	1.36412
72	2.192	254.102	0	255	63.896	16.867	3.632	557.054	99.648	72165	720	213	57.848	2.416	1.50331
90	1.706	253.846	0	255	48.07	22.906	3.728	433.046	99.548	56100	547	281	81.87	1.308	2.85015
8	2.756	255	255	255	38.254	3.316	3.794	702.715	100	91035	430	59	84.685	1.775	2.13746
14	2.169	255	255	255	36.227	3.428	3.831	553.117	100	71655	393	50	36.607	1.07	3.58037
229	1.853	255	255	255	66.097	54.822	3.851	472.413	100	61200	743	641	62.85	1.139	3.38104
313	5.126	194.706	0	255	31.51	72.308	4.015	997.973	76.355	129285	343	836	23.199	2.936	1.36751
187	1.814	255	255	255	33.945	44.278	4.05	462.571	100	59925	364	505	12.529	1.556	2.60283
120	3.636	255	255	255	88.058	33.43	4.065	927.111	100	120105	994	361	96.203	1.964	2.06976
125	1.698	255	255	255	25.483	34.302	4.1	433.046	100	56100	271	405	45	1.999	2.05103
180	0.903	255	255	255	19.133	44.324	4.226	230.301	100	29835	208	527	69.305	0.831	5.08544
108	2.015	255	255	255	89.23	29.882	4.446	513.749	100	66555	999	361	60.396	1.431	3.10692
69	3.095	255	255	255	53.306	17.49	4.449	789.324	100	102255	604	225	80.91	3.337	1.33323
51	3.497	254.437	0	255	59.411	14.129	4.489	889.712	99.779	115260	663	139	139.764	2.929	1.5326
132	3.551	255	255	255	23.367	36.092	4.847	905.459	100	117300	245	386	133.531	3.065	1.5814
179	1.274	255	255	255	51.692	44.694	4.861	324.784	100	42075	587	481	96.226	0.638	7.61912
54	3.52	255	255	255	9.088	14.509	4.915	897.585	100	116280	103	191	61.144	2.751	1.78662
136	1.829	255	255	255	44.489	37.644	5.057	466.508	100	60435	502	455	82.011	1.019	4.96271
95	4.454	255	255	255	55.07	25.267	5.059	1135.76	100	147135	627	253	110.323	3.753	1.34799
257	1.822	252.839	0	255	21.197	60.577	5.242	460.603	99.153	59670	214	715	50.44	1.337	3.92072
317	3.396	255	255	255	28.242	73.839	5.325	866.091	100	112200	297	866	52.374	2.025	2.62963
168	3.798	255	255	255	85.568	43.663	5.541	968.447	100	125460	961	466	104.697	1.449	3.82402
109	0.201	255	255	255	40.81	38.448	0.621	51.178	100	6630	462	435	135	0.439	1.41458
113	0.208	255	255	255	38.92	39.763	0.634	53.146	100	6885	440	454	33.69	0.527	1.20304
124	0.208	255	255	255	78.642	44.318	0.634	53.146	100	6885	892	506	33.69	0.439	1.44419
154	0.232	255	255	255	65.18	53.869	0.634	59.052	100	7650	740	610	123.69	0.527	1.20304
37	0.247	255	255	255	61.188	18.299	0.669	62.988	100	8160	693	210	23.199	0.527	1.26945
55	0.239	255	255	255	41.7	21.754	0.669	61.02	100	7905	473	251	66.801	0.527	1.26945
188	0.216	255	255	255	82.892	64.717	0.669	55.115	100	7140	942	733	113.199	0.439	1.52392
88	0.201	255	255	255	41.648	30.933	0.686	51.178	100	6630	471	355	39.806	0.487	1.40862
116	0.262	255	255	255	34.65	40.844	0.708	66.925	100	8670	391	467	29.745	0.527	1.34345
150	0.293	255	255	255	69.734	51.895	0.708	74.799	100	9690	792	587	119.745	0.615	1.15122
207	0.278	255	255	255	7.739	74.348	0.708	70.862	100	9180	85	849	29.745	0.615	1.15122
85	0.232	255	255	255	32.136	30.812	0.725	59.052	100	7650	365	355	75.964	0.527	1.37571
129	0.216	255	255	255	47.086	46.951	0.751	55.115	100	7140	532	533	159.444	0.439	1.71071
7	0.201	255	255	255	60.464	3.998	0.756	51.178	100	6630	685	49	54.462	0.457	1.65427
99	0.232	255	255	255	86.632	36.18	0.756	59.052	100	7650	983	415	54.462	0.497	1.52113
165	0.208	255	255	255	60.745	56.7	0.756	53.146	100	6885	689	642	125.538	0.463	1.63283
196	0.332	255	255	255	78.949	70.736	0.756	84.641	100	10965	895	807	35.538	0.615	1.22927
201	0.27	255	255	255	2.752	73.105	0.756	68.894	100	8925	28	835	35.538	0.527	1.43454
209	0.301	255	255	255	23.691	75.147	0.756	76.767	100	9945	266	853	144.462	0.615	1.22927
125	0.347	255	255	255	40.363	45.58	0.786	88.577	100	11475	457	515	116.565	0.615	1.27805
230	0.201	255	255	255	36.002	80.577	0.786	51.178	100	6630	408	913	116.565	0.432	1.81944
235	0.371	255	255	255	6.295	82.304	0.786	94.483	100	12240	69	933	116.565	0.695	1.13094
20	0.224	255	255	255	33.706	12.459	0.81	57.083	100	7395	383	138	102.529	0.439	1.8451
21	0.224	255	255	255	73.588	12.889	0.81	57.083	100	7395	833	148	12.529	0.439	1.8451
65	0.27	255	255	255	55.347	23.874	0.81	68.894	100	8925	626	274	40.601	0.589	1.37521
155	0.34	255	255	255	57.074	53.965	0.81	86.609	100	11220	647	618	40.601	0.615	1.31707
60	0.363	255	255	255	64.134	22.629	0.829	92.514	100	11985	726	255	147.995	0.615	1.34797
107	0.332	255	255	255	42.662	38.532	0.829	84.641	100	10965	482	442	57.995	0.615	1.34797
117	0.309	255	255	255	81.559	41.439	0.829	78.736	100	10200	926	476	57.995	0.589	1.40747
81	0.208	255	255	255	33.775	29.324	0.834	53.146	100	6885	383	339	71.565	0.508	1.64173
192	0.224	255	255	255	38.79	68.271	0.834	57.083	100	7395	437	776	161.565	0.351	2.37607
40	0.355	255	255	255	73.681	18.819	0.865	90.546	100	11730	834	216	23.962	0.527	1.64137
70	0.347	255	255	255	34.108	24.756	0.865	88.577	100	11475	384	284	23.962	0.527	1.64137
180	0.371	255	255	255	12.009	60.709	0.865	94.483	100	12240	132	689	156.038	0.621	1.39291
193	0.201	255	255	255	37.874	68.452	0.865	51.178	100	6630	426	780	23.962	0.439	1.97039
10	0.371	255	255	255	63.91	5.799	0.879	94.483	100	12240	724	62	126.87	0.615	1.42927
77	0.278	255	255	255	47.295	27.768	0.879	70.862	100	9180	535	312	126.87	0.497	1.76861
181	0.371	255	255	255	9.71	60.809	0.879	94.483	100	12240	106	694	36.87	0.621	1.41546
208	0.432	255	255	255	36.085	74.564	0.879	110.23	100	14280	407	845	126.87	0.703	1.25036
147	0.278	255	255	255	38.651	51.236	0.896	70.862	100	9180	439	578	101.31	0.439	2.041
243	0.216	255	255	255	24.136	83.761	0.896	55.115	100	7140	274	948	101.31	0.351	2.55271
245	0.216	255	255	255	34.218	84.084	0.896	55.115	100	7140	384	956	168.69	0.405	2.21235
200	0.409	255	255	255	82.867	72.275	0.905	104.325	100	13515	941	818	119.055	0.615	1.47154
211	0.355	255	255	255	81.963	75.282	0.905	90.546	100	11730	930	861	60.945	0.615	1.47154
239	0.386	255	255	255	10.373	83.473	0.905	98.419	100	12750	116	945	119.055	0.703	1.28734
106	0.378	255	255	255	73.038	37.936	0.917	96.451	100	12495	829	427	106.699	0.615	1.49106
52	0.301	255	255	255	53.275	20.695	0.946	76.767	100	9945	602	238	21.801	0.683	1.38507
101	0.216	255	255	255	51.193	36.615	0.946	55.115	100	7140	582	412	111.801	0.519	1.82274
115	0.417	255	255	255	40.451	40.428	0.946	106.293	100	13770	458	465	68.199	0.615	1.53821
179	0.27	255	255	255	55.704	60.491	0.946	68.894	100	8925	632	694	68.199	0.465	2.03441
3	0.255	255	255	255	19.98	0.518	0.95	64.957	100	8415	223	3	146.31	0.424	2.24057
74	0.224	255	255	255	25.402	26.044	0.95	57.083	100	7395	285	299	33.69	0.459	2.06972
195	0.262	255	255	255	5.442	69.887	0.95	66.925	100	8670	60	801	56.31	0.487	1.95072
216	0.316	255	255	255	15.004	76.316	0.95	80.704	100	10455	168	873	56.31	0.511	1.8591
250	0.533	255	255	255	25.929	88.693	0.95	135.819	100	17595	290	1012	33.69	0.791	1.20101
31	0.286	255	255	255	27.541	16.777	0.982	72.83	100	9435	313	197	79.695	0.439	2.2369
110	0.432	255	255	255	86.677	38.997	0.982	110.23	100	14280	984	439	116.565	0.615	1.59675
28	0.324	255	255	255	38.39	15.812	1.002	82.672	100	10710	433	176	142.125	0.497	2.0161
34	0.301	255	255	255	56.938	17.767	1.002	76.767	100	9945	644	198	127.875	0.672	1.49107
35	0.247	255	255	255	53.665	17.907	1.002	62.988	100	8160	605	202	164.745	0.351	2.8547
43	0.301	255	255	255	62.266	19.222	1.002	76.767	100	9945	705	214	127.875	0.471	2.12739
86	0.448	255	255	255	89.407	30.778	1.002	114.167	100	14790	1012	351	15.255	0.615	1.62927
118	0.587	255	255	255	47.241	42.112	1.002	149.598	100	19380	534	484	52.125	0.87	1.15172
131	0.239	255	255	255	29.715	47.513	1.002	61.02	100	7905	334	536	127.875	0.414	2.42029
160	0.247	255	255	255	23.447	55.387	1.002	62.988	100	8160	263	635	52.125	0.404	2.4802
234	0.224	255	255	255	15.64	82.225	1.002	57.083	100	7395	174	941	52.125	0.435	2.30345
62	0.309	255	255	255	35.324	23.283	1.025	78.736	100	10200	400	260	120.964	0.621	1.65056
91	0.656	255	255	255	76.802	31.889	1.025	167.313	100	21675	871	358	120.964	0.879	1.1661
135	0.208	255	255	255	43.547	48.916	1.025	53.146	100	6885	490	560	30.964	0.511	2.00587
162	0.239	255	255	255	62.472	55.755	1.025	61.02	100	7905	706	638	30.964	0.392	2.6148
171	0.286	255	255	255	47.203	58.078	1.025	72.83	100	9435	534	665	59.036	0.527	1.94497
19	0.455	255	255	255	35.333	12.496	1.028	116.135	100	15045	400	148	70.017	0.658	1.56231
166	0.262	255	255	255	61.664	56.938	1.058	66.925	100	8670	699	643	131.634	0.551	1.92015
186	0.232	255	255	255	12.789	63.504	1.058	59.052	100	7650	141	718	131.634	0.373	2.83646
219	0.324	255	255	255	20.086	77.431	1.058	82.672	100	10710	229	875	94.764	0.439	2.41002
5	0.409	255	255	255	43.975	3.149	1.062	104.325	100	13515	495	33	155.556	0.56	1.89643
69	0.239	255	255	255	30.568	24.831	1.062	61.02	100	7905	345	289	65.556	0.524	2.02672
72	0.378	255	255	255	42.374	24.989	1.062	96.451	100	12495	477	286	24.444	0.586	1.81229
168	0.594	255	255	255	18.37	57.577	1.062	151.566	100	19635	204	653	155.556	0.864	1.22917
241	0.301	255	255	255	85.826	83.521	1.062	76.767	100	9945	972	948	155.556	0.5	2.124
138	0.425	255	255	255	44.438	49.52	1.069	108.261	100	14025	504	570	80.538	0.615	1.73821
89	0.309	255	255	255	36.349	31.357	1.072	78.736	100	10200	409	352	145.008	0.621	1.72625
174	0.471	255	255	255	63.02	58.95	1.072	120.072	100	15555	713	676	55.008	0.707	1.51627
184	0.255	255	255	255	9.165	63.087	1.072	64.957	100	8415	99	714	124.992	0.577	1.85789
100	0.563	255	255	255	69.52	36.52	1.087	143.692	100	18615	791	410	104.036	0.788	1.37944
122	0.34	255	255	255	75.607	42.773	1.087	86.609	100	11220	858	492	75.964	0.527	2.06262
233	0.347	255	255	255	83.793	82.008	1.087	88.577	100	11475	949	937	14.036	0.703	1.54623
242	0.378	255	255	255	88.487	83.759	1.087	96.451	100	12495	1005	959	75.964	0.527	2.06262
87	0.448	255	255	255	34.466	30.991	1.125	114.167	100	14790	385	352	141.34	0.902	1.24723
251	0.394	255	255	255	63.485	89.274	1.125	100.388	100	13005	719	1011	128.66	0.535	2.1028
127	0.471	255	255	255	55.038	46.474	1.142	120.072	100	15555	620	527	157.38	0.615	1.85691
128	0.409	255	255	255	39.657	46.831	1.142	104.325	100	13515	449	539	67.38	0.55	2.07636
4	0.201	255	255	255	47.782	1.095	1.146	51.178	100	6630	540	7	122.471	0.341	3.3607
57	0.579	255	255	255	36.476	22.417	1.146	147.629	100	19125	412	249	122.471	0.703	1.63016
175	0.54	255	255	255	47.689	59.458	1.146	137.787	100	17850	538	683	57.529	0.852	1.34507
183	0.44	255	255	255	10.195	63.153	1.146	112.198	100	14535	115	712	94.399	0.527	2.17457
185	0.208	255	255	255	85.452	63.221	1.146	53.146	100	6885	967	716	147.529	0.345	3.32174
220	0.594	255	255	255	13.2	77.525	1.146	151.566	100	19635	145	886	32.471	0.683	1.67789
229	0.224	255	255	255	7.706	80.583	1.146	57.083	100	7395	85	923	57.529	0.373	3.07239
80	0.278	255	255	255	42.472	29.108	1.156	70.862	100	9180	477	330	171.254	0.384	3.01042
50	0.324	255	255	255	54.468	20.513	1.172	82.672	100	10710	613	236	12.995	0.472	2.48305
102	0.718	255	255	255	44.193	36.726	1.172	183.06	100	23715	497	420	12.995	0.879	1.33333
144	0.548	255	255	255	42.827	50.91	1.172	139.756	100	18105	487	573	102.995	0.785	1.49299
161	0.409	255	255	255	59.168	55.821	1.172	104.325	100	13515	672	642	77.005	0.439	2.6697
194	0.371	255	255	255	84.681	68.748	1.172	94.483	100	12240	958	784	12.995	0.439	2.6697
39	0.309	255	255	255	48.272	18.71	1.179	78.736	100	10200	544	215	26.565	0.505	2.33465
64	0.34	255	255	255	61.521	23.73	1.179	86.609	100	11220	698	265	116.565	0.773	1.52523
231	0.224	255	255	255	30.894	80.968	1.179	57.083	100	7395	349	915	116.565	0.393	3
236	0.201	255	255	255	11.78	82.645	1.179	51.178	100	6630	130	947	63.435	0.375	3.144
54	0.27	255	255	255	21.326	21.891	1.195	68.894	100	8925	236	253	36.027	0.47	2.54255
71	0.286	255	255	255	41.152	25.145	1.195	72.83	100	9435	465	292	53.973	0.449	2.66147
202	0.494	255	255	255	15.805	73.204	1.221	125.977	100	16320	174	830	149.744	0.75	1.628
137	0.409	255	255	255	36.209	49.298	1.243	104.325	100	13515	404	562	8.13	0.791	1.57143
199	0.533	255	255	255	42.174	72.055	1.249	135.819	100	17595	475	827	50.711	0.808	1.54579
244	0.401	255	255	255	17.677	83.898	1.249	102.356	100	13260	195	950	140.711	0.559	2.23435
12	0.378	255	255	255	70.162	7.397	1.258	96.451	100	12495	793	80	155.225	0.526	2.39163
51	0.702	255	255	255	62.293	20.845	1.258	179.123	100	23205	707	244	77.905	0.91	1.38242
148	0.633	255	255	255	75.678	51.184	1.258	161.408	100	20910	855	579	155.225	0.746	1.68633
226	0.401	250.096	0	255	49.571	79.668	1.258	100.388	98.077	13005	557	905	155.225	0.615	2.04553
134	0.386	255	255	255	39.385	49.139	1.267	98.419	100	12750	445	554	123.69	0.536	2.36381
142	0.571	255	255	255	71.877	50.621	1.267	145.661	100	18870	812	573	146.31	0.668	1.89671
149	0.625	255	255	255	63.453	52.073	1.267	159.439	100	20655	717	598	56.31	0.808	1.56807
145	0.811	255	255	255	14.561	50.852	1.279	206.681	100	26775	159	581	15.945	0.879	1.45506
223	0.463	255	255	255	33.499	78.866	1.279	118.103	100	15300	374	896	164.055	0.688	1.85901
68	0.448	241.81	0	255	25.441	24.976	1.297	108.261	94.828	14025	287	290	61.699	0.604	2.14735
24	0.394	255	255	255	68.135	14.01	1.306	100.388	100	13005	768	163	19.654	0.528	2.47348
187	0.772	255	255	255	83.62	63.829	1.306	196.839	100	25500	949	721	109.654	0.953	1.37041
237	0.208	255	255	255	38.067	82.843	1.344	53.146	100	6885	432	936	101.31	0.255	5.27059
197	0.448	255	255	255	81.542	70.899	1.367	114.167	100	14790	924	814	45	0.683	2.00146
205	0.301	255	255	255	40.166	73.604	1.367	76.767	100	9945	452	833	135	0.497	2.7505
224	0.324	255	255	255	85.727	78.975	1.389	82.672	100	10710	969	903	34.695	0.362	3.83702
67	0.363	255	255	255	52.4	24.871	1.417	92.514	100	11985	596	276	97.125	0.439	3.22779
82	0.363	255	255	255	87.901	30.09	1.417	92.514	100	11985	997	350	60.255	0.41	3.4561
152	0.425	255	255	255	78.251	52.079	1.417	108.261	100	14025	883	593	7.125	0.558	2.53943
228	0.386	255	255	255	3.323	80.537	1.417	98.419	100	12750	32	920	29.745	0.55	2.57636
177	0.479	255	255	255	86.617	60.328	1.419	122.04	100	15810	983	679	111.801	0.528	2.6875
8	0.756	255	255	255	60.986	5.305	1.441	192.902	100	24990	687	65	37.569	0.896	1.60826
29	0.849	255	255	255	71.871	16.744	1.449	216.523	100	28050	809	189	165.964	1.225	1.18286
11	0.363	255	255	255	36.193	7.669	1.462	92.514	100	11985	408	94	57.265	0.422	3.46445
44	0.347	255	255	255	67.232	19.463	1.462	88.577	100	11475	759	215	122.735	0.575	2.54261
203	0.633	255	255	255	80.928	73.259	1.462	161.408	100	20910	915	829	147.265	0.815	1.79387
14	0.726	255	255	255	73.254	8.663	1.473	185.029	100	23970	834	108	72.646	1.258	1.17091
108	0.34	255	255	255	77.374	38.372	1.473	86.609	100	11220	872	439	17.354	0.439	3.35535
139	0.316	255	255	255	75.65	49.322	1.473	80.704	100	10455	852	559	162.646	0.483	3.04969
23	0.525	255	255	255	53.388	13.975	1.494	133.85	100	17340	599	155	151.928	0.615	2.42927
156	0.409	255	255	255	46.558	54.336	1.494	104.325	100	13515	525	627	61.928	0.5	2.988
214	0.371	255	255	255	35.279	76.075	1.501	94.483	100	12240	394	869	20.556	0.453	3.31347
136	0.494	255	255	255	64.735	49.271	1.504	125.977	100	16320	729	559	6.71	0.853	1.76319
130	0.27	255	255	255	72.452	47.36	1.512	68.894	100	8925	817	535	144.462	0.439	3.44419
56	0.471	255	255	255	35.203	22.158	1.517	120.072	100	15555	391	250	169.992	0.482	3.1473
94	0.278	255	255	255	56.891	34.446	1.534	70.862	100	9180	639	394	13.241	0.295	5.2
119	0.448	255	255	255	54.297	42.327	1.534	114.167	100	14790	616	474	103.241	0.447	3.43177
25	0.432	255	255	255	65.187	14.476	1.537	110.23	100	14280	738	157	120.964	0.493	3.11765
103	0.656	255	255	255	42.794	37.284	1.572	167.313	100	21675	483	430	63.435	0.879	1.7884
16	0.347	255	255	255	31.829	10.2	1.584	88.577	100	11475	355	121	33.69	0.411	3.85401
46	0.293	255	255	255	60.699	20.09	1.584	74.799	100	9690	691	219	93.18	0.338	4.68639
246	0.548	255	255	255	12.321	85.538	1.584	139.756	100	18105	136	983	70.56	0.612	2.58824
163	0.448	255	255	255	47.676	56.477	1.603	114.167	100	14790	540	653	80.538	0.734	2.18392
53	0.625	255	255	255	58.252	21.496	1.613	159.439	100	20655	655	250	29.358	0.639	2.52426
48	0.911	250.678	0	255	43.814	20.38	1.62	228.333	98.305	29580	498	240	77.471	1.066	1.5197
206	0.448	255	255	255	17.067	73.924	1.634	114.167	100	14790	187	836	143.746	0.467	3.49893
248	0.332	255	255	255	42.163	87.821	1.658	84.641	100	10965	475	1007	57.995	0.354	4.68362
26	0.78	255	255	255	62.795	15.146	1.667	198.807	100	25755	705	175	18.435	0.758	2.19921
33	0.895	255	255	255	43.754	17.393	1.667	228.333	100	29580	489	198	161.565	1.117	1.49239
221	0.463	255	255	255	3.634	78.613	1.667	118.103	100	15300	38	904	71.565	0.417	3.9976
189	0.579	255	255	255	82.908	65.747	1.679	147.629	100	19125	935	748	6.009	0.527	3.18596
38	0.664	255	255	255	56.709	18.638	1.69	169.281	100	21930	637	207	152.103	0.55	3.07273
151	0.718	255	255	255	44.269	52.167	1.69	183.06	100	23715	493	598	27.897	0.953	1.77335
215	0.563	255	255	255	5.851	76.837	1.69	143.692	100	18615	65	864	98.973	0.527	3.20683
58	0.718	246.774	0	255	38.928	22.663	1.706	177.155	96.774	22950	438	249	124.509	0.75	2.27467
238	0.332	255	255	255	84.507	82.923	1.731	84.641	100	10965	953	940	156.038	0.432	4.00694
45	0.687	255	255	255	46.908	19.492	1.744	175.187	100	22695	530	231	49.086	1.056	1.65152
95	0.556	255	255	255	79.573	35.4	1.757	141.724	100	18360	899	413	36.87	1.114	1.5772
123	0.316	255	255	255	49.185	43.802	1.757	80.704	100	10455	552	504	36.87	0.39	4.50513
15	0.54	255	255	255	71.953	9.511	1.777	137.787	100	17850	819	119	81.469	0.615	2.88943
84	0.849	255	255	255	20.7	31.313	1.777	216.523	100	28050	234	365	81.469	0.703	2.52774
2	0.741	255	255	255	57.419	0.854	1.779	188.965	100	24480	648	0	110.225	0.783	2.27203
190	0.687	255	255	255	35.375	66.923	1.779	175.187	100	22695	396	757	147.095	0.756	2.35317
213	0.803	255	255	255	18.68	75.933	1.779	204.712	100	26520	205	861	159.775	0.945	1.88254
120	0.425	255	255	255	46.216	43.007	1.811	108.261	100	14025	522	478	104.036	0.563	3.2167
225	0.664	255	255	255	82.816	80.024	1.811	169.281	100	21930	939	921	67.166	0.577	3.13865
59	0.394	255	255	255	66.029	22.751	1.828	100.388	100	13005	747	251	125.218	0.678	2.69617
96	0.903	255	255	255	85.603	35.914	1.847	230.301	100	29835	970	417	64.654	1.014	1.8215
140	0.471	255	255	255	79.121	49.928	1.868	120.072	100	15555	891	560	131.186	0.899	2.07786
97	0.934	255	255	255	78.017	35.625	1.878	238.175	100	30855	879	402	169.216	0.791	2.37421
13	0.965	255	255	255	76.054	8.071	1.897	246.049	100	31875	856	94	13.392	0.791	2.39823
143	0.849	255	255	255	65.976	51.092	1.901	216.523	100	28050	745	590	56.31	0.837	2.27121
172	0.857	255	255	255	49.596	58.69	1.945	218.491	100	28305	551	674	18.435	1.166	1.6681
104	1.003	255	255	255	47.275	36.749	1.951	255.891	100	33150	526	415	172.235	0.788	2.47589
249	0.479	255	255	255	19.435	88.543	1.951	122.04	100	15810	213	1002	144.162	0.463	4.21382
78	0.641	255	255	255	44.09	28.4	2.003	163.376	100	21165	492	327	15.255	0.703	2.84922
164	0.695	255	255	255	22.487	56.983	2.005	177.155	100	22950	250	637	118.811	0.629	3.1876
36	0.726	255	255	255	50.791	18.531	2.044	185.029	100	23970	568	215	25.463	0.748	2.73262
105	0.718	255	255	255	52.441	37.193	2.051	183.06	100	23715	588	432	43.264	0.543	3.77716
141	0.965	255	255	255	51.562	50.616	2.057	246.049	100	31875	577	583	19.983	0.895	2.29832
112	1.034	255	255	255	41.876	40.108	2.127	263.764	100	34170	466	447	141.71	0.979	2.17263
158	0.679	255	255	255	18.766	55.102	2.145	173.218	100	22440	209	638	55.008	0.855	2.50877
218	0.695	255	255	255	18.839	77.477	2.17	177.155	100	22950	207	893	58.241	0.782	2.77494
170	0.965	255	255	255	60.704	58.698	2.174	246.049	100	31875	690	653	104.036	1.068	2.03558
22	1.058	255	255	255	31.215	13.406	2.217	269.669	100	34935	343	146	146.31	1.647	1.34608
222	0.587	255	255	255	13.521	79.101	2.24	149.598	100	19380	145	911	48.18	0.46	4.86957
1	0.826	255	255	255	54.442	1.061	2.252	210.618	100	27285	615	24	69.444	0.668	3.37126
217	0.857	255	255	255	37.354	77.571	2.281	218.491	100	28305	422	896	74.358	0.806	2.83002
63	0.849	248.045	0	255	62.742	24.361	2.291	210.618	97.273	27285	714	261	94.399	1.136	2.01673
98	0.672	255	255	255	43.934	35.818	2.299	171.25	100	22185	485	409	6.582	0.439	5.2369
176	0.98	255	255	255	15.73	60.396	2.299	249.985	100	32385	171	676	133.452	1.002	2.29441
178	1.598	255	255	255	58.197	61.057	2.306	407.456	100	52785	650	704	49.635	1.493	1.54454
182	1.629	255	255	255	54.17	63.398	2.306	415.33	100	53805	610	733	72.255	1.364	1.69062
212	0.579	255	255	255	21.474	76.177	2.306	147.629	100	19125	235	878	49.635	0.492	4.68699
210	0.895	255	255	255	42.841	75.893	2.32	228.333	100	29580	482	852	127.304	0.818	2.83619
47	1.204	255	255	255	65.745	20.176	2.321	307.069	100	39780	734	235	29.476	1.385	1.67581
17	1.011	255	255	255	73.623	11.217	2.366	257.859	100	33405	831	139	58.671	0.889	2.66142
42	0.988	255	255	255	42.056	19.38	2.39	251.954	100	32640	471	230	36.027	1.272	1.87893
79	0.664	255	255	255	30.207	29.521	2.39	169.281	100	21930	333	344	36.027	0.747	3.19946
9	1.112	255	255	255	36.976	6.109	2.43	283.448	100	36720	409	74	40.601	1.342	1.81073
111	1.328	255	255	255	80.628	39.834	2.443	338.563	100	43860	910	443	127.694	1.757	1.39044
167	1.312	255	255	255	88.501	58.009	2.474	334.626	100	43350	1005	645	96.116	0.832	2.97356
75	0.911	255	255	255	57.535	26.801	2.497	232.27	100	30090	644	315	39.289	1.107	2.25565
169	1.443	252.273	0	255	51.844	58.172	2.53	364.152	98.93	47175	574	667	20.323	1.332	1.8994
173	1.467	255	255	255	57.311	59.349	2.53	373.994	100	48450	644	664	110.323	1.077	2.34912
247	1.096	255	255	255	18.325	86.687	2.584	279.511	100	36210	206	973	107.819	1.181	2.18798
191	1.227	253.396	0	255	11.802	68.64	2.596	311.005	99.371	40290	119	774	156.038	1.083	2.39705
6	1.142	255	255	255	41.445	4.027	2.656	291.322	100	37740	461	56	34.216	0.761	3.49014
18	1.181	255	255	255	28.547	12.642	2.678	301.163	100	39015	314	133	131.009	0.788	3.39848
126	2.015	254.023	0	255	45.363	46.67	2.707	511.781	99.617	66300	509	516	103.134	2.223	1.21772
198	0.648	255	255	255	4.028	71.677	2.734	165.345	100	21420	36	826	45	0.435	6.28506
83	3.057	240.189	0	255	39.96	30.864	2.792	734.209	94.192	95115	442	355	24.146	1.845	1.51328
41	2.053	255	255	255	37.098	19.488	2.86	523.591	100	67830	406	229	10.62	1.401	2.0414
90	1.482	255	255	255	80.794	32.191	2.882	377.931	100	48960	909	354	142.431	1.144	2.51923
157	1.32	255	255	255	52.528	55.159	2.953	336.594	100	43605	590	613	120.379	1.429	2.06648
232	1.05	255	255	255	28.592	81.289	3.019	267.701	100	34680	310	916	171.634	1.129	2.67405
32	1.814	255	255	255	69.182	17.164	3.026	462.571	100	59925	770	201	25.821	1.263	2.39588
92	2.053	255	255	255	72.505	35.429	3.03	523.591	100	67830	821	386	106.858	1.662	1.8231
159	2.285	255	255	255	64.271	55.868	3.298	582.643	100	75480	719	647	48.24	1.631	2.02207
133	1.212	255	255	255	75.08	47.776	3.308	309.037	100	40035	833	544	10.713	1.035	3.19614
93	2.532	248.003	0	255	75.942	35.092	3.437	627.916	97.256	81345	845	411	32.471	1.849	1.85884
30	2.154	255	255	255	63.409	17.223	3.444	549.18	100	71145	703	197	5.856	1.731	1.9896
76	1.66	255	255	255	30.144	28.138	3.511	423.204	100	54825	335	338	58.299	1.375	2.55345
66	2.115	236.387	0	255	43.527	26.004	3.623	499.971	92.701	64770	471	309	39.094	2.293	1.58003
146	2.563	255	255	255	46.178	51.417	3.708	653.505	100	84660	511	604	36.327	2.099	1.76656
204	1.42	255	255	255	21.236	74.127	3.785	362.184	100	46920	222	834	158.199	0.874	4.33066
27	1.907	253.968	0	255	69.773	15.353	3.803	484.224	99.595	62730	771	180	6.633	1.295	2.93668
121	1.914	255	255	255	51.337	43.692	3.964	488.16	100	63240	568	482	167.196	2.748	1.4425
240	2.679	255	255	255	86.782	84.398	3.969	683.031	100	88485	962	950	152.301	2.247	1.76636
153	2.223	255	255	255	61.981	53.877	4.141	566.896	100	73440	701	639	72.719	1.195	3.46527
114	2.439	255	255	255	75.127	40.414	4.163	622.011	100	80580	838	454	172.725	2.163	1.92464
132	2.856	255	255	255	79.291	48.304	4.221	728.304	100	94350	876	552	2.386	1.772	2.38205
49	2.57	255	255	255	69.029	20.493	4.313	655.473	100	84915	761	235	176.496	1.478	2.91813
32	0.216	255	255	255	16.11	8.962	0.634	55.115	100	7140	181	99	123.69	0.439	1.44419
272	0.224	255	255	255	4.637	70.449	0.634	57.083	100	7395	50	804	33.69	0.527	1.20304
337	0.232	255	255	255	10.004	88.837	0.634	59.052	100	7650	112	1008	123.69	0.527	1.20304
40	0.27	255	255	255	35.11	11.476	0.669	68.894	100	8925	396	132	23.199	0.615	1.0878
68	0.232	255	255	255	85.185	16.907	0.669	59.052	100	7650	968	189	113.199	0.439	1.52392
107	0.255	255	255	255	72.663	23.345	0.669	64.957	100	8415	826	262	113.199	0.527	1.26945
178	0.224	255	255	255	45.879	39.29	0.669	57.083	100	7395	519	445	156.801	0.527	1.26945
255	0.216	255	255	255	64.331	63.092	0.669	55.115	100	7140	730	715	113.199	0.439	1.52392
306	0.239	255	255	255	16.139	80.761	0.669	61.02	100	7905	180	918	156.801	0.527	1.26945
31	0.232	255	255	255	76.745	8.487	0.686	59.052	100	7650	871	93	129.806	0.527	1.30171
197	0.255	255	255	255	76.771	45.054	0.686	64.957	100	8415	871	510	129.806	0.585	1.17265
11	0.293	255	255	255	45.273	3.098	0.708	74.799	100	9690	512	33	150.255	0.615	1.15122
29	0.293	255	255	255	65.515	7.979	0.708	74.799	100	9690	743	94	60.255	0.615	1.15122
91	0.27	255	255	255	75.349	20.49	0.708	68.894	100	8925	855	230	119.745	0.611	1.15876
150	0.27	255	255	255	5.223	32.501	0.708	68.894	100	8925	56	372	29.745	0.527	1.34345
25	0.201	255	255	255	77.279	7.37	0.746	51.178	100	6630	876	87	45	0.5	1.492
242	0.208	255	255	255	6.955	58.968	0.746	53.146	100	6885	76	674	45	0.435	1.71494
322	0.262	255	255	255	64.664	84.608	0.751	66.925	100	8670	734	967	69.444	0.589	1.27504
120	0.216	255	255	255	66.512	27.013	0.756	55.115	100	7140	755	304	125.538	0.527	1.43454
141	0.239	255	255	255	85.434	31.387	0.756	61.02	100	7905	969	360	35.538	0.497	1.52113
152	0.216	255	255	255	34.042	32.774	0.756	55.115	100	7140	384	370	144.462	0.471	1.6051
160	0.363	255	255	255	71.888	34.014	0.756	92.514	100	11985	815	384	125.538	0.703	1.07539
19	0.27	255	255	255	62.371	5.511	0.786	68.894	100	8925	706	64	26.565	0.527	1.49146
210	0.255	255	255	255	15.052	49.799	0.786	64.957	100	8415	170	571	63.435	0.527	1.49146
250	0.286	255	255	255	61.576	61.958	0.786	72.83	100	9435	699	701	116.565	0.527	1.49146
42	0.208	255	255	255	46.023	11.609	0.81	53.146	100	6885	520	135	40.601	0.463	1.74946
51	0.27	255	255	255	44.927	13.336	0.81	68.894	100	8925	507	150	167.471	0.517	1.56673
201	0.224	255	255	255	54.868	45.855	0.81	57.083	100	7395	621	519	139.399	0.435	1.86207
267	0.208	255	255	255	63.738	67.598	0.81	53.146	100	6885	724	764	102.529	0.527	1.537
276	0.309	255	255	255	7.793	71.961	0.81	78.736	100	10200	84	819	12.529	0.695	1.16547
75	0.316	255	255	255	72.159	17.871	0.829	80.704	100	10455	819	208	57.995	0.615	1.34797
90	0.27	255	255	255	26.151	20.49	0.829	68.894	100	8925	294	236	32.005	0.51	1.62549
127	0.201	255	255	255	68.567	28.507	0.829	51.178	100	6630	777	322	147.995	0.414	2.00242
165	0.208	255	255	255	54.666	35.695	0.829	53.146	100	6885	618	409	32.005	0.432	1.91898
191	0.232	255	255	255	45.634	43.282	0.829	59.052	100	7650	515	490	147.995	0.559	1.48301
212	0.239	255	255	255	39.065	50.483	0.829	61.02	100	7905	441	577	32.005	0.467	1.77516
225	0.224	255	255	255	56.564	53.641	0.829	57.083	100	7395	640	613	32.005	0.439	1.88838
226	0.363	255	255	255	33.836	54.042	0.829	92.514	100	11985	381	617	32.005	0.615	1.34797
293	0.201	255	255	255	83.517	75.836	0.829	51.178	100	6630	948	859	122.005	0.389	2.13111
33	0.255	255	255	255	36.25	9.815	0.834	64.957	100	8415	410	108	108.435	0.439	1.89977
88	0.255	255	255	255	77.828	20.363	0.834	64.957	100	8415	885	227	108.435	0.471	1.7707
245	0.239	255	255	255	55.865	60.063	0.834	61.02	100	7905	634	688	71.565	0.351	2.37607
278	0.201	255	255	255	77.562	71.946	0.834	51.178	100	6630	882	824	71.565	0.351	2.37607
330	0.255	255	255	255	23.303	86.947	0.834	64.957	100	8415	261	991	18.435	0.615	1.3561
43	0.201	255	255	255	41.517	11.733	0.865	51.178	100	6630	468	132	156.038	0.431	2.00696
62	0.224	255	255	255	30.04	15.843	0.865	57.083	100	7395	340	175	113.962	0.439	1.97039
111	0.355	255	255	255	69.468	24.478	0.87	90.546	100	11730	787	275	135	0.615	1.41463
20	0.332	255	255	255	63.778	5.708	0.879	84.641	100	10965	722	68	36.87	0.527	1.66793
96	0.208	255	255	255	73.471	21.472	0.879	53.146	100	6885	834	240	126.87	0.422	2.08294
229	0.409	255	255	255	66.071	55.102	0.879	104.325	100	13515	748	624	143.13	0.703	1.25036
313	0.425	255	255	255	15.205	82.408	0.879	108.261	100	14025	170	942	53.13	0.703	1.25036
236	0.224	255	255	255	18.694	56.122	0.905	57.083	100	7395	211	643	60.945	0.417	2.17026
254	0.278	255	255	255	53.218	63.219	0.905	70.862	100	9180	602	723	29.055	0.629	1.43879
332	0.247	255	255	255	65.15	87.62	0.905	62.988	100	8160	739	1002	60.945	0.426	2.12441
9	0.208	255	255	255	34.566	2.214	0.917	53.146	100	6885	389	27	16.699	0.351	2.61254
56	0.224	255	255	255	35.481	14.659	0.917	57.083	100	7395	402	162	106.699	0.384	2.38802
128	0.201	255	255	255	43.004	28.899	0.917	51.178	100	6630	488	323	106.699	0.439	2.08884
147	0.232	255	255	255	17.821	32.104	0.917	59.052	100	7650	197	365	16.699	0.457	2.00656
223	0.324	255	255	255	68.252	53.372	0.917	82.672	100	10710	771	608	16.699	0.689	1.33091
224	0.371	255	255	255	20.887	53.515	0.917	94.483	100	12240	233	607	163.301	0.527	1.74004
248	0.316	255	255	255	58.903	61.172	0.917	80.704	100	10455	669	701	73.301	0.439	2.08884
323	0.371	255	255	255	11.257	84.725	0.917	94.483	100	12240	123	966	16.699	0.527	1.74004
24	0.502	255	255	255	36.231	7.239	0.934	127.945	100	16575	409	78	131.186	0.791	1.18078
93	0.394	255	255	255	19.99	21.097	0.934	100.388	100	13005	223	243	41.186	0.621	1.50403
194	0.286	255	255	255	62.469	44.728	0.934	72.83	100	9435	708	513	41.186	0.536	1.74254
219	0.216	255	255	255	8.984	53.082	0.934	55.115	100	7140	100	608	48.814	0.55	1.69818
169	0.432	255	255	255	87.435	37.263	0.946	110.23	100	14280	993	429	68.199	0.667	1.41829
94	0.278	255	255	255	74.058	21.208	0.95	70.862	100	9180	840	237	123.69	0.471	2.01699
136	0.216	255	255	255	71.323	30.493	0.95	55.115	100	7140	809	343	123.69	0.389	2.44216
203	0.247	255	255	255	21.413	46.422	0.95	62.988	100	8160	241	533	56.31	0.393	2.4173
296	0.216	255	255	255	49.8	76.469	0.95	55.115	100	7140	564	875	56.31	0.389	2.44216
341	0.224	255	255	255	22.206	89.618	0.95	57.083	100	7395	249	1015	123.69	0.435	2.18391
95	0.355	255	255	255	59.244	21.329	0.982	90.546	100	11730	669	241	153.435	0.55	1.78545
146	0.309	255	255	255	79.141	32.141	0.982	78.736	100	10200	898	361	116.565	0.482	2.03734
162	0.316	255	255	255	6.288	35.466	0.982	80.704	100	10455	69	398	116.565	0.527	1.86338
199	0.278	255	255	255	54.058	45.626	0.982	70.862	100	9180	612	514	116.565	0.477	2.0587
155	0.201	255	255	255	56.03	33.302	0.994	51.178	100	6630	634	375	135	0.311	3.19614
6	0.316	255	255	255	39.994	1.628	1.002	80.704	100	10455	451	15	142.125	0.55	1.82182
30	0.378	255	255	255	32.758	8.304	1.002	96.451	100	12495	369	99	52.125	0.585	1.71282
157	0.355	255	255	255	31.622	33.711	1.002	90.546	100	11730	359	378	105.255	0.527	1.90133
170	0.239	255	255	255	47.884	37.509	1.002	61.02	100	7905	541	432	52.125	0.463	2.16415
180	0.278	255	255	255	49.965	40.122	1.002	70.862	100	9180	568	463	74.745	0.439	2.28246
206	0.386	255	255	255	49.15	47.807	1.002	98.419	100	12750	556	549	37.875	0.786	1.27481
214	0.27	255	255	255	11.217	51.401	1.002	68.894	100	8925	124	588	37.875	0.528	1.89773
235	0.286	255	255	255	42.226	56.114	1.002	72.83	100	9435	479	633	105.255	0.414	2.42029
260	0.525	255	255	255	19.795	64.283	1.002	133.85	100	17340	220	733	15.255	0.703	1.42532
275	0.216	255	255	255	64.35	71.2	1.002	55.115	100	7140	728	807	142.125	0.471	2.12739
338	0.224	255	255	255	29.449	88.945	1.002	57.083	100	7395	331	1008	142.125	0.369	2.71545
92	0.386	255	255	255	15.326	20.872	1.025	98.419	100	12750	169	240	30.964	0.59	1.73729
27	0.309	255	255	255	69.545	7.699	1.028	78.736	100	10200	790	82	109.983	0.414	2.48309
53	0.594	255	255	255	80.796	13.83	1.028	151.566	100	19635	914	156	160.017	0.791	1.29962
97	0.247	255	255	255	69.505	21.514	1.028	62.988	100	8160	785	243	160.017	0.527	1.95066
209	0.224	255	255	255	65.671	49.524	1.028	57.083	100	7395	746	569	70.017	0.385	2.67013
163	0.255	255	255	255	17.807	35.608	1.058	64.957	100	8415	198	409	41.634	0.482	2.19502
261	0.286	255	255	255	56.941	64.945	1.058	72.83	100	9435	644	735	138.366	0.487	2.17248
300	0.355	255	255	255	41.586	77.467	1.058	90.546	100	11730	468	878	131.634	0.741	1.4278
329	0.224	255	255	255	56.025	86.806	1.058	57.083	100	7395	633	985	138.366	0.476	2.22269
138	0.255	255	255	255	19.237	30.93	1.062	64.957	100	8415	213	355	24.444	0.393	2.70229
153	0.239	255	255	255	11.517	32.965	1.069	61.02	100	7905	124	374	170.538	0.439	2.43508
158	0.371	255	255	255	73.164	33.74	1.069	94.483	100	12240	831	378	99.462	0.439	2.43508
218	0.309	255	255	255	68.49	52.329	1.072	78.736	100	10200	775	599	34.992	0.559	1.91771
233	0.386	255	255	255	65.479	56.033	1.072	98.419	100	12750	741	642	55.008	0.658	1.62918
52	0.293	255	255	255	45.832	13.773	1.087	74.799	100	9690	520	163	75.964	0.592	1.83615
66	0.286	255	255	255	47.687	16.896	1.087	72.83	100	9435	541	199	75.964	0.439	2.47608
202	0.494	255	255	255	64.185	46.405	1.101	125.977	100	16320	728	534	61.39	0.683	1.61201
288	0.262	255	255	255	25.52	75.137	1.101	66.925	100	8670	290	849	118.61	0.778	1.41517
12	0.34	255	255	255	37.604	3.934	1.111	86.609	100	11220	426	51	71.565	0.445	2.49663
65	0.255	255	255	255	28.531	16.828	1.111	64.957	100	8415	322	185	108.435	0.424	2.62028
83	0.239	255	255	255	76.937	19.619	1.111	61.02	100	7905	869	225	18.435	0.351	3.16524
149	0.355	255	255	255	74.388	32.401	1.111	90.546	100	11730	840	367	161.565	0.5	2.222
228	0.316	255	255	255	40.125	55.112	1.125	80.704	100	10455	453	632	51.34	0.439	2.56264
240	0.702	249.396	0	255	60.178	58.688	1.125	175.187	97.802	22695	679	671	38.66	1.054	1.06736
263	0.286	255	255	255	61.818	65.456	1.142	72.83	100	9435	702	751	67.38	0.559	2.04293
279	0.301	255	255	255	47.316	72.784	1.142	76.767	100	9945	533	831	22.62	0.439	2.60137
340	0.224	255	255	255	60.909	89.405	1.142	57.083	100	7395	691	1012	112.62	0.334	3.41916
132	0.355	255	255	255	72.669	29.524	1.146	90.546	100	11730	824	331	122.471	0.528	2.17045
282	0.463	255	255	255	1.633	74.141	1.146	118.103	100	15300	16	850	57.529	0.597	1.9196
327	0.316	255	255	255	20.607	86.248	1.146	80.704	100	10455	230	976	122.471	0.435	2.63448
49	0.293	255	255	255	8.249	12.881	1.156	74.799	100	9690	87	146	171.254	0.431	2.68213
217	0.378	255	255	255	61.402	52.15	1.156	96.451	100	12495	699	588	98.746	0.615	1.87967
22	0.548	255	255	255	39.255	7.19	1.172	139.756	100	18105	444	75	102.995	0.791	1.48167
39	0.247	255	255	255	72.923	11.262	1.179	62.988	100	8160	827	134	63.435	0.358	3.2933
186	0.239	255	255	255	60.499	42.006	1.179	61.02	100	7905	683	481	26.565	0.369	3.19512
342	0.286	255	255	255	54.037	89.586	1.179	72.83	100	9435	610	1015	153.435	0.614	1.9202
61	0.262	255	255	255	22.438	15.608	1.182	66.925	100	8670	250	183	48.013	0.435	2.71724
76	0.255	255	255	255	74.327	18.052	1.182	64.957	100	8415	842	210	48.013	0.51	2.31765
154	0.695	255	255	255	9.881	33.468	1.182	177.155	100	22950	108	375	131.987	0.966	1.2236
221	0.324	255	255	255	53.581	53.343	1.182	82.672	100	10710	605	603	138.013	0.435	2.71724
301	0.355	255	255	255	23.67	77.998	1.182	90.546	100	11730	265	892	41.987	0.559	2.11449
171	0.672	255	255	255	7.267	38.109	1.195	171.25	100	22185	78	439	53.973	0.879	1.3595
253	0.517	255	255	255	57.134	63.201	1.195	131.882	100	17085	649	712	107.103	0.703	1.69986
74	0.332	255	255	255	71.018	18.073	1.224	84.641	100	10965	806	213	68.962	0.439	2.78815
204	0.255	255	255	255	54.213	47.003	1.224	64.957	100	8415	610	538	21.038	0.393	3.1145
303	0.239	255	255	255	44.217	78.612	1.224	61.02	100	7905	501	901	68.962	0.379	3.22955
46	0.417	255	255	255	46.536	12.543	1.249	106.293	100	13770	526	137	129.289	0.652	1.91564
315	0.401	255	255	255	22.568	83.756	1.249	102.356	100	13260	253	948	129.289	0.668	1.86976
121	0.463	255	255	255	78.036	27.22	1.258	118.103	100	15300	882	312	24.775	0.615	2.04553
142	0.486	255	255	255	4.776	31.534	1.258	124.008	100	16065	48	355	155.225	0.583	2.1578
256	0.27	255	255	255	34.216	63.679	1.258	68.894	100	8925	388	732	77.905	0.349	3.60458
305	0.548	255	255	255	20.916	79.65	1.258	139.756	100	18105	235	913	65.225	0.629	2
339	0.27	255	255	255	49.998	89.424	1.258	68.894	100	8925	567	1010	102.095	0.424	2.96698
196	0.363	255	255	255	46.407	45.108	1.267	92.514	100	11985	523	518	33.69	0.668	1.89671
249	0.633	255	255	255	17.059	61.788	1.267	161.408	100	20910	189	708	33.69	0.746	1.69839
71	0.409	255	255	255	76.804	17.859	1.279	104.325	100	13515	872	211	74.055	0.556	2.30036
72	0.594	255	255	255	1.762	17.867	1.279	151.566	100	19635	14	200	164.055	0.861	1.48548
284	0.378	255	255	255	43.855	74.509	1.279	96.451	100	12495	498	841	105.945	0.49	2.6102
126	0.332	255	255	255	22.528	28.87	1.297	84.641	100	10965	255	335	61.699	0.982	1.32077
159	0.448	255	255	255	47.238	33.98	1.297	114.167	100	14790	534	393	61.699	0.471	2.75372
45	0.448	255	255	255	25.65	12.482	1.306	114.167	100	14790	290	149	70.346	0.538	2.42751
117	0.201	255	255	255	79.066	25.611	1.306	51.178	100	6630	893	289	160.346	0.306	4.26797
139	0.973	255	255	255	81.299	31.163	1.306	248.017	100	32130	918	356	19.654	1.044	1.25096
166	0.803	252.548	0	255	86.063	36.232	1.306	202.744	99.038	26265	975	419	42.274	0.932	1.40129
239	0.232	255	255	255	9.861	57.395	1.306	59.052	100	7650	110	661	70.346	0.385	3.39221
14	0.347	255	255	255	41.367	4.316	1.318	88.577	100	11475	465	44	143.13	0.437	3.01602
70	0.286	255	255	255	88.39	17.825	1.338	72.83	100	9435	1003	209	66.801	0.437	3.06178
1	0.432	255	255	255	40.506	0.565	1.341	110.23	100	14280	457	13	58.392	0.472	2.8411
311	0.224	255	255	255	24.86	82.186	1.341	57.083	100	7395	277	942	58.392	0.478	2.80544
109	0.417	255	255	255	14.959	23.717	1.344	106.293	100	13770	162	267	168.69	0.527	2.55028
37	0.324	255	255	255	31.826	10.328	1.364	82.672	100	10710	356	115	165.069	0.439	3.10706
252	0.486	255	255	255	62.988	62.778	1.372	124.008	100	16065	710	719	39.806	0.683	2.00878
175	0.401	255	255	255	3.947	39.43	1.375	102.356	100	13260	41	455	63.435	0.615	2.23577
57	0.301	255	255	255	46.107	14.946	1.389	76.767	100	9945	519	174	34.695	0.643	2.16019
123	0.756	255	255	255	21.981	27.973	1.417	192.902	100	24990	241	316	172.875	1.003	1.41276
47	0.409	255	255	255	36.033	12.805	1.419	104.325	100	13515	407	138	111.801	0.445	3.18876
270	0.587	255	255	255	58.968	68.478	1.419	149.598	100	19380	669	772	111.801	0.698	2.03295
333	0.27	255	255	255	54.574	88.257	1.419	68.894	100	8925	617	997	111.801	0.426	3.33099
102	0.563	255	255	255	72.307	22.395	1.43	143.692	100	18615	815	254	169.38	0.584	2.44863
230	0.486	255	255	255	58.251	55.459	1.43	124.008	100	16065	657	638	47.49	0.682	2.09677
145	0.316	255	255	255	47.706	32.265	1.441	80.704	100	10455	538	374	52.431	0.373	3.86327
5	0.509	255	255	255	33.177	1.978	1.449	129.914	100	16830	375	31	75.964	0.527	2.74953
18	0.27	255	255	255	38.212	5.88	1.454	68.894	100	8925	432	74	64.983	0.346	4.20231
273	0.455	255	255	255	45.336	71.239	1.454	116.135	100	15045	512	803	115.017	0.538	2.7026
280	0.479	255	255	255	36.892	73.162	1.462	122.04	100	15810	414	827	122.735	0.678	2.15634
285	0.618	255	255	255	35.014	74.872	1.462	157.471	100	20400	394	859	57.265	0.668	2.18862
283	0.278	255	255	255	40.583	73.906	1.473	70.862	100	9180	453	843	17.354	0.396	3.7197
82	0.347	255	255	255	69.331	19.554	1.494	88.577	100	11475	785	231	61.928	0.527	2.83491
290	0.479	255	255	255	65.884	75.455	1.494	122.04	100	15810	747	867	61.928	0.62	2.40968
289	0.834	255	255	255	64.627	75.657	1.496	212.586	100	27540	737	852	93.366	1.054	1.41935
151	0.741	255	255	255	0.435	33.069	1.501	188.965	100	24480	2	384	69.444	0.74	2.02838
334	0.679	255	255	255	26.805	88.189	1.512	173.218	100	22440	298	998	144.462	0.672	2.25
99	0.409	255	255	255	12.319	22.15	1.534	104.325	100	13515	138	261	76.759	0.485	3.16289
116	0.772	255	255	255	57.58	26.044	1.534	196.839	100	25500	653	305	76.759	0.615	2.49431
134	0.486	255	255	255	34.008	30.199	1.534	124.008	100	16065	381	351	66.371	0.739	2.07578
216	0.602	255	255	255	16.007	52.061	1.534	153.534	100	19890	179	601	66.371	0.579	2.6494
319	0.44	255	255	255	63.927	84.381	1.537	112.198	100	14535	723	953	120.964	0.461	3.33406
21	0.417	255	255	255	79.883	6.69	1.557	106.293	100	13770	908	67	106.39	0.577	2.69844
113	0.517	255	255	255	44.881	25.56	1.557	131.882	100	17085	508	299	73.61	0.439	3.5467
184	0.718	255	255	255	6.803	41.363	1.557	183.06	100	23715	75	479	73.61	0.861	1.80836
23	0.602	255	255	255	46.1	7.483	1.564	153.534	100	19890	517	88	38.157	0.746	2.09651
316	0.432	255	255	255	66.624	83.954	1.572	110.23	100	14280	754	948	116.565	0.627	2.50718
317	0.486	255	255	255	44.548	83.909	1.572	124.008	100	16065	499	961	26.565	0.668	2.35329
55	0.888	255	255	255	70.053	14.275	1.584	226.365	100	29325	790	159	160.56	0.896	1.76786
60	0.556	255	255	255	75.745	15.767	1.584	141.724	100	18360	857	186	56.31	0.633	2.50237
167	0.455	255	255	255	53.362	36.078	1.584	116.135	100	15045	599	414	19.44	0.431	3.67517
277	0.301	255	255	255	48.702	72.329	1.584	76.767	100	9945	548	830	56.31	0.432	3.66667
336	0.486	255	255	255	25.325	88.579	1.584	124.008	100	16065	281	1001	123.69	0.721	2.19695
220	0.718	255	255	255	66.399	53.544	1.603	183.06	100	23715	755	601	99.462	0.852	1.88146
232	0.316	255	255	255	52.384	55.74	1.613	80.704	100	10455	588	639	29.358	0.369	4.37127
326	0.44	255	255	255	11.549	85.877	1.613	112.198	100	14535	123	981	29.358	0.571	2.82487
185	0.471	255	255	255	53.088	41.95	1.615	120.072	100	15555	597	474	157.62	0.5	3.23
195	0.679	255	255	255	51.66	45.225	1.615	173.218	100	22440	582	508	135	1.027	1.57254
15	0.471	255	255	255	3.187	5.239	1.62	120.072	100	15555	36	69	77.471	0.546	2.96703
271	0.509	255	255	255	45.334	69.89	1.651	129.914	100	16830	510	790	154.799	1.023	1.61388
183	1.019	255	255	255	20.234	41.216	1.658	259.827	100	33660	225	477	57.995	0.93	1.7828
237	0.293	255	255	255	60.546	57.18	1.658	74.799	100	9690	685	658	57.995	0.4	4.145
264	0.834	255	255	255	62.943	65.897	1.658	212.586	100	27540	709	743	122.005	0.938	1.76759
287	0.548	255	255	255	42.8	75.111	1.658	139.756	100	18105	482	847	122.005	0.683	2.42753
297	0.772	249.9	0	255	63.855	76.819	1.667	192.902	98	24990	723	867	108.435	0.916	1.81987
[truncated: 521 more rows]

## Sheet: Size
Range	Frequency
0.5–1	512
1–1.5	819
1.5–2	499
2–2.5	255
2.5–3	161
2.5–3.5	109
3.5–4	63
4–4.5	54
4.5–5	21
5–5.5	22
>5.5	5
Total WPBs	2520

## Sheet: Aspect
Ratio	Frequency
1–1.5	456
1.5–2	625
2–2.5	505
2.5–3	339
3–3.5	241
3.5–4	159
4–4.5	84
4.5–5	53
5–5.5	25
5.5–6	18
>6	15
