# Supplementary material for: V-ATPase V0a1 promotes Weibel–Palade body biogenesis through the regulation of membrane fission
Source: eLife journal article supplement (doi:10.7554/elife.71526), 2021-12-14
Supplement: fig4-data1 [file Fig 4B_left.xlsx]

## Sheet: Sheet1
shControl	No of WPB	ROI			shV0a1	No of WPB	ROI			shV0a2	No of WPB	ROI
1	305	4	76.25		1	112	3	37.3333		1	245	4	61.25
2	342	4	85.5		2	186	5	37.2		2	272	4	68
3	297	4	74.25		3	127	3	42.3333		3	334	4	83.5
4	354	4	88.5		4	152	3	50.6667		4	332	4	83
5	261	3	87		5	107	4	26.75		5	395	5	79
6	372	4	93		6	197	5	39.4		6	399	4	99.75
7	335	4	83.75		7	87	2	43.5		7	251	3	83.6667
8	297	4	74.25		8	155	4	38.75		8	342	4	85.5
		31	82.8125				29	39.4917				32	80.4583
			7.08589					6.78066					11.649
