# Supplementary material for: V-ATPase V0a1 promotes Weibel–Palade body biogenesis through the regulation of membrane fission
Source: eLife journal article supplement (doi:10.7554/elife.71526), 2021-12-14
Supplement: fig4-data1 [file Fig 4B_right.xlsx]

## Sheet: Sheet1
	No of >2 um	No of<2 um	total WPB	% of >2um
shCont-1	108	191	299	36.1204
shCont-2	107	230	337	31.7507
shCont-3	89	205	294	30.2721
shCont-4	107	247	354	30.226			shControl	shV0a1	shV0a2
shCont-5	81	178	259	31.2741		Avarage	32.5	10.9	26.8
shCont-6	123	243	366	33.6066		SD	2.1	2.8	2.1
shCont-7	106	226	332	31.9277
shCont-8	101	191	292	34.589
			Average	32.4708
			SD	2.11171
	No of >2 um	No of<2 um	total WPB	% of >2um
shV0a2-1	66	176	242	27.2727
shV0a2-2	79	188	267	29.588
shV0a2-3	91	237	328	27.7439
shV0a2-4	76	248	324	23.4568
shV0a2-5	113	285	398	28.392
shV0a2-6	60	190	250	24
shV0a2-7	92	249	341	26.9795
shV0a2-8	105	287	392	26.7857
			Average	26.7773
			SD	2.08625
	No of >2 um	No of<2 um	total WPB	% of >2um
shV0a1-1	16	95	111	14.4144
shV0a1-2	17	170	187	9.09091
shV0a1-3	9	118	127	7.08661
shV0a1-4	19	133	152	12.5
shV0a1-5	9	98	107	8.41121
shV0a1-6	21	175	196	10.7143
shV0a1-7	13	74	87	14.9425
shV0a1-8	15	140	155	9.67742
			Average	10.8547
			SD	2.84792
