# Supplementary material for: V-ATPase V0a1 promotes Weibel–Palade body biogenesis through the regulation of membrane fission
Source: eLife journal article supplement (doi:10.7554/elife.71526), 2021-12-14
Supplement: fig5-data1 [file Fig 5C-E.xlsx]

## Sheet: Sheet1
	PKD1	shControl	shV0a1		PKD2	shControl	shV0a1		PKD3	shControl	shV0a1
	1	0.103	0.284		1	0.052	0.164		1	-0.084	0.215
	2	0.077	0.303		2	0.024	0.454		2	0.127	0.49
	3	0.101	0.397		3	0.032	0.349		3	-0.005	0.51
	4	0.09	0.326		4	-0.007	0.204		4	0.14	0.333
	5	-0.009	0.231		5	-0.056	0.286		5	0.023	0.21
	6	0.106	0.25		6	-0.095	0.329		6	-0.045	0.245
	7	0.037	0.456		7	0.05	0.341		7	0.073	0.471
	8	0.036	0.201		8	-0.011	0.231		8	0.0016	0.213
	9	0.078	0.268		9	-0.032	0.197		9	0.013	0.25
	10	0.091	0.244		10	0.007	0.168		10	0.058	0.202
	11	0.065	0.366		11	-0.079	0.322		11	0.043	0.304
	12	-0.003	0.436		12	0.014	0.437		12	0.032	0.273
	13	0.14	0.547						13	-0.005	0.203
	14	0.1	0.412
	Average	0.0722857	0.337214			-0.00841667	0.290167			0.0285846	0.301462
	SD	0.0428475	0.101118			0.0484251	0.0988266			0.0622525	0.114992
