# Supplementary material for: V-ATPase V0a1 promotes Weibel–Palade body biogenesis through the regulation of membrane fission
Source: eLife journal article supplement (doi:10.7554/elife.71526), 2021-12-14
Supplement: fig5-figsupp3-data1 [file Fig5-fig supp 3C.xlsx]

## Sheet: Sheet1
		WPB	Cells	WPB/cell			WPB	Cells	WPB/cell			WPB	Cells	WPB/cell			WPB	Cells	WPB/cell
	EGFP-1	734	12	61.1667		PKD1-K612N-1	495	12	41.25		PKD2-K580N-1	398	10	39.8		PKD3-K605N-1	434	9	48.2222
	EGFP-2	757	12	63.0833		PKD1-K612N-2	358	11	32.5455		PKD2-K580N-2	571	12	47.5833		PKD3-K605N-2	241	7	34.4286
	EGFP-3	748	12	62.3333		PKD1-K612N-3	421	11	38.2727		PKD2-K580N-3	489	10	48.9		PKD3-K605N-3	204	7	29.1429
	EGFP-4	608	11	55.2727		PKD1-K612N-4	451	11	41		PKD2-K580N-4	464	9	51.5556		PKD3-K605N-4	463	10	46.3
	EGFP-5	712	12	59.3333		PKD1-K612N-5	332	10	33.2		PKD2-K580N-5	396	9	44		PKD3-K605N-5	349	9	38.7778
	EGFP-6	747	12	62.25		PKD1-K612N-6	252	9	28		PKD2-K580N-6	305	9	33.8889		PKD3-K605N-6	409	10	40.9
	EGFP-7	762	12	63.5		PKD1-K612N-7	236	9	26.2222		PKD2-K580N-7	466	11	42.3636		PKD3-K605N-7	319	8	39.875
	EGFP-8	753	12	62.75		PKD1-K612N-8	320	11	29.0909		PKD2-K580N-8	399	8	49.875		PKD3-K605N-8	272	7	38.8571
			Avarage	61.2112				Avarage	33.6977				Avarage	44.7458				Avarage	39.5629
			SD	2.73191				SD	5.88504				SD	5.93482				SD	6.07466
						Average	SD
					Control	61.2112	2.73191
					PKD1-DN	33.6977	5.88504
					PKD2-DN	44.7458	5.93482
					PKD3-DN	39.5629	6.07466
