# Supplementary material for: V-ATPase V0a1 promotes Weibel–Palade body biogenesis through the regulation of membrane fission
Source: eLife journal article supplement (doi:10.7554/elife.71526), 2021-12-14
Supplement: fig6-data1 [file Fig 6A-C.xlsx]

## Sheet: Sheet1
	PKCe-C1	shControl	shV0a1		PKD-C1a	shControl	shV0a1		OSBP-PH	shControl	shV0a1
	1	-0.062	0.317		1	0.076	0.183		1	-0.059	0.148
	2	-0.065	0.314		2	0.094	0.509		2	-0.041	0.296
	3	-0.096	0.512		3	0.009	0.189		3	0.085	0.183
	4	-0.069	0.463		4	0.029	0.126		4	-0.059	0.51
	5	-0.111	0.342		5	0.052	0.149		5	0.012	0.251
	6	-0.063	0.406		6	0.095	0.126		6	0.042	0.453
	7	-0.129	0.395		7	0.086	0.287		7	-0.086	0.184
	8	-0.089	0.383		8	-0.013	0.129		8	-0.082	0.384
	9	-0.148	0.276		9	0.047	0.122		9	-0.071	0.4
	10	-0.06	0.291		10	0.048	0.27		10	-0.027	0.387
	11	-0.065	0.273		11	0.054	0.618		11	-0.075	0.287
	12	-0.073	0.27		12	-0.033	0.28		12	-0.06	0.143
	13	-0.063	0.297		13	-0.022	0.187		13	0.042	0.29
	14	-0.081	0.321		14	-0.072	0.24		14	0.03	0.312
	15	-0.074	0.447						15	0.063	0.321
	16	-0.005	0.425						16	0.062	0.27
	17	-0.063	0.362						17	0.076	0.445
	18	-0.073	0.306						18	0.064	0.425
	19	-0.068	0.334
	Average	-0.0766842	0.354421			0.0321429	0.243929			-0.00466667	0.316056
	SD	0.0299816	0.0705717			0.0515526	0.149078			0.0627075	0.109333
